# Supplementary material
Source: publisher figshare collection journal article supplement (https://rs.figshare.com/ndownloader/files/37510277)
Supplement: Supplementary file 1 [file 37510277]

## Sheet: Article information
Title:	Rising floor and dropping ceiling: organ heterogeneity in response to cold acclimation of the largest extant amphibian
Authors:	Wei Zhu1,2*,#, Chunlin Zhao1,#, Tian Zhao1, Liming Chang1,2, Qiheng Chen1,2, Jiongyu Liu1, Cheng Li1, Feng Xie1, Jianping Jiang1,2*
Affiliations:	1 CAS Key Laboratory of Mountain Ecological Restoration and Bioresource Utilization & Ecological Restoration Biodiversity Conservation Key Laboratory of Sichuan Province, Chengdu Institute of Biology, Chengdu, China 2 University of Chinese Academy of Sciences, Beijing 10049, China
Notes:	#These authors contributed equally to this work. *Correspondence: Wei Zhu, zhuwei@cib.ac.cn, Tel.: 86-028-82890935; Jianping Jiang, jiangjp@cib.ac.cn.
DOI:	DOI: 10.1098/rspb.2022.1394

## Sheet: Table S1
This data is the food intake of larvae acclimated at 2019. Note: '\' in conversion rate denotes the body weight were not recorded during this period, and thus the growth rate and food conversion rate can not be calculated.
Days after acclimation	Temperature oC	Container ID （Temp---Number）	Food intake (g)	Food conversion rate
0	7	7--1	1.3	\
1	7	7--1	0.8	\
2	7	7--1	0.7	\
5	7	7--1	0.8	0.26
7	7	7--1	1.4	0.15
9	7	7--1	0.9	0.23
11	7	7--1	0.9	0.23
15	7	7--1	0.5	0.41
17	7	7--1	0.6	0.34
19	7	7--1	0.6	0.34
21	7	7--1	1.3	0.16
26	7	7--1	0.6	0.34
33	7	7--1	0.9	0.23
37	7	7--1	0.8	0.26
40	7	7--1	1	0.2
59	7	7--1	0.7	\
84	7	7--1	0.6	\
86	7	7--1	0.8	\
90	7	7--1	1.3	\
111	7	7--1	0.5	\
113	7	7--1	1.3	\
115	7	7--1	0.8	\
117	7	7--1	0.8	\
119	7	7--1	1	\
120	7	7--1	1	\
121	7	7--1	1	\
125	7	7--1	1.3	\
128	7	7--1	1.6	\
0	7	7--2	1	\
1	7	7--2	0.8	\
2	7	7--2	0.8	\
5	7	7--2	1	0.34
7	7	7--2	1.2	0.29
9	7	7--2	1.1	0.31
11	7	7--2	1	0.34
15	7	7--2	0.7	0.49
17	7	7--2	0.5	0.69
19	7	7--2	0.9	0.38
21	7	7--2	0.9	0.38
26	7	7--2	1	0.34
33	7	7--2	0.9	0.38
37	7	7--2	1.2	0.29
40	7	7--2	0.9	0.38
59	7	7--2	0.8	\
84	7	7--2	0.9	\
86	7	7--2	1.2	\
90	7	7--2	1	\
111	7	7--2	0.5	\
113	7	7--2	1	\
115	7	7--2	0.7	\
117	7	7--2	1.1	\
119	7	7--2	1.2	\
120	7	7--2	1.6	\
121	7	7--2	1.3	\
125	7	7--2	1	\
128	7	7--2	1.9	\
0	7	7--3	0.9	\
1	7	7--3	0.8	\
2	7	7--3	0.8	\
5	7	7--3	0.9	0.46
7	7	7--3	1.6	0.26
9	7	7--3	1.3	0.32
11	7	7--3	0.7	0.59
15	7	7--3	0.9	0.46
17	7	7--3	0.7	0.59
19	7	7--3	0.8	0.52
21	7	7--3	0.8	0.52
26	7	7--3	1	0.41
33	7	7--3	1	0.41
37	7	7--3	1	0.41
40	7	7--3	1.2	0.34
59	7	7--3	1.2	\
84	7	7--3	0.6	\
86	7	7--3	1.6	\
90	7	7--3	1.3	\
111	7	7--3	1.3	\
113	7	7--3	1	\
115	7	7--3	1	\
117	7	7--3	0.8	\
119	7	7--3	1	\
120	7	7--3	1.3	\
121	7	7--3	1.4	\
125	7	7--3	1.3	\
128	7	7--3	1.8	\
0	15	15--1	2.2	\
1	15	15--1	2.5	\
2	15	15--1	1.3	\
5	15	15--1	1.9	0.56
9	15	15--1	1.6	0.66
11	15	15--1	1.3	0.81
13	15	15--1	1.1	0.96
15	15	15--1	2.3	0.46
17	15	15--1	2.2	0.48
19	15	15--1	3.1	0.34
21	15	15--1	3.7	0.29
26	15	15--1	2.7	0.39
33	15	15--1	2	0.53
37	15	15--1	1.9	0.56
40	15	15--1	2.8	0.38
59	15	15--1	1.6	\
84	15	15--1	2.3	\
85	15	15--1	2.2	\
86	15	15--1	2.5	\
90	15	15--1	4.1	\
111	15	15--1	3.5	\
113	15	15--1	3.6	\
115	15	15--1	2.3	\
117	15	15--1	3.1	\
119	15	15--1	2.9	\
120	15	15--1	4	\
121	15	15--1	4.5	\
125	15	15--1	1.9	\
128	15	15--1	4.9	\
0	15	15--2	2.2	\
1	15	15--2	1.9	\
2	15	15--2	2.2	\
5	15	15--2	1.7	0.91
9	15	15--2	1.5	1.03
11	15	15--2	2	0.77
13	15	15--2	1.7	0.91
15	15	15--2	2.3	0.67
17	15	15--2	2.1	0.74
19	15	15--2	3.1	0.5
21	15	15--2	3.2	0.48
26	15	15--2	2.8	0.55
33	15	15--2	2.8	0.55
37	15	15--2	2	0.77
40	15	15--2	3.6	0.43
59	15	15--2	2.2	\
84	15	15--2	4.2	\
85	15	15--2	2.3	\
86	15	15--2	3	\
90	15	15--2	4.3	\
111	15	15--2	3.6	\
113	15	15--2	4	\
115	15	15--2	3.8	\
117	15	15--2	3.3	\
119	15	15--2	3.4	\
120	15	15--2	3.7	\
121	15	15--2	4.6	\
125	15	15--2	4.4	\
128	15	15--2	4.1	\
0	15	15--3	1.8	\
1	15	15--3	2.6	\
2	15	15--3	1.3	\
5	15	15--3	1.2	1.2
9	15	15--3	1.5	0.96
11	15	15--3	2	0.72
13	15	15--3	1.8	0.8
15	15	15--3	1.9	0.76
17	15	15--3	2.4	0.6
19	15	15--3	3.9	0.37
21	15	15--3	3.1	0.47
26	15	15--3	3.2	0.45
33	15	15--3	2.1	0.69
37	15	15--3	1.7	0.85
40	15	15--3	3	0.48
59	15	15--3	1	\
84	15	15--3	3.8	\
85	15	15--3	2.4	\
86	15	15--3	4.2	\
90	15	15--3	3.8	\
111	15	15--3	4.6	\
113	15	15--3	4.3	\
115	15	15--3	2.1	\
117	15	15--3	3.4	\
119	15	15--3	3.9	\
120	15	15--3	4	\
121	15	15--3	4.5	\
125	15	15--3	4	\
128	15	15--3	4	\

## Sheet: Table S2
This data is the growth rate of larvae acclimated at 2019.
Days after acclimation	Temperature oC	Container ID （Temp---Number）	Weight (g)	Length (cm)	Condition factor (weight/length3*100)
5	7	7--1	3.8	8.5	0.618767
5	7	7--1	3.6	8.5	0.5862
5	7	7--1	3.6	8.2	0.652921
5	7	7--1	3.5	8.1	0.658587
5	7	7--1	3.5	8	0.683594
5	7	7--1	3.2	8	0.625
5	7	7--1	3.2	8.1	0.602136
5	7	7--1	3.1	7.5	0.734815
5	7	7--1	3.1	7.8	0.653248
5	7	7--1	3.1	8	0.605469
5	7	7--1	3.1	8	0.605469
5	7	7--1	3	7.7	0.657127
5	7	7--1	3	7.6	0.683409
5	7	7--1	3	8	0.585938
5	7	7--1	2.9	8	0.566406
5	7	7--1	2.9	7.6	0.660628
5	7	7--1	2.8	7.6	0.637848
5	7	7--1	2.7	7.5	0.64
5	7	7--1	2.7	7.6	0.615068
5	7	7--1	2.5	7.4	0.616943
5	7	7--2	3.9	8.5	0.63505
5	7	7--2	3.8	8.5	0.618767
5	7	7--2	3.7	8.5	0.602483
5	7	7--2	3.7	8.6	0.58171
5	7	7--2	3.6	8.5	0.5862
5	7	7--2	3.5	8.5	0.569917
5	7	7--2	3.5	8.5	0.569917
5	7	7--2	3.5	8	0.683594
5	7	7--2	3.4	8	0.664062
5	7	7--2	3.2	8.1	0.602136
5	7	7--2	3.2	8	0.625
5	7	7--2	3.2	7.6	0.728969
5	7	7--2	3.1	7.7	0.679031
5	7	7--2	3.1	7.5	0.734815
5	7	7--2	3.1	8	0.605469
5	7	7--2	3	7.8	0.632175
5	7	7--2	3	8.1	0.564503
5	7	7--2	3	8	0.585938
5	7	7--2	2.9	8	0.566406
5	7	7--2	2.5	7.5	0.592593
5	7	7--3	3.9	8.6	0.613154
5	7	7--3	3.5	8.3	0.612116
5	7	7--3	3.5	8	0.683594
5	7	7--3	3.5	8.4	0.590514
5	7	7--3	3.3	8	0.644531
5	7	7--3	3.3	8.3	0.577138
5	7	7--3	3.2	7.7	0.700935
5	7	7--3	3.2	8	0.625
5	7	7--3	3.1	8	0.605469
5	7	7--3	3	7.6	0.683409
5	7	7--3	2.9	7.8	0.611103
5	7	7--3	2.8	7.5	0.663704
5	7	7--3	2.8	7.5	0.663704
5	7	7--3	2.8	7.7	0.613318
5	7	7--3	2.7	7.5	0.64
5	7	7--3	2.5	7.1	0.698498
5	7	7--3	2.5	7.5	0.592593
5	7	7--3	2.3	7.4	0.567587
5	7	7--3	2.1	7	0.612245
5	7	7--3		8.3
5	15	15--1	3.4	8.5	0.553633
5	15	15--1	3.4	8.4	0.573642
5	15	15--1	3.4	8.4	0.573642
5	15	15--1	3.3	8.3	0.577138
5	15	15--1	3.2	8	0.625
5	15	15--1	3.2	8.4	0.539898
5	15	15--1	3.2	8.5	0.521067
5	15	15--1	3.2	8	0.625
5	15	15--1	3.1	8.5	0.504783
5	15	15--1	3.1	8.4	0.523027
5	15	15--1	3.1	7.9	0.628754
5	15	15--1	3.1	7.8	0.653248
5	15	15--1	3	8	0.585938
5	15	15--1	3	8.1	0.564503
5	15	15--1	3	8	0.585938
5	15	15--1	2.9	7.9	0.588189
5	15	15--1	2.7	7.8	0.568958
5	15	15--1	2.7	7.5	0.64
5	15	15--1	2.7	7.3	0.694057
5	15	15--1	2.6	7.8	0.547885
5	15	15--2	3.8	8.5	0.618767
5	15	15--2	3.8	8.5	0.618767
5	15	15--2	3.7	8.7	0.561881
5	15	15--2	3.6	8.5	0.5862
5	15	15--2	3.6	8.1	0.677404
5	15	15--2	3.3	7.6	0.75175
5	15	15--2	3.3	8	0.644531
5	15	15--2	3.3	7.9	0.669318
5	15	15--2	3.3	7.8	0.695393
5	15	15--2	3.2	8	0.625
5	15	15--2	3.2	7.7	0.700935
5	15	15--2	3.2	8.3	0.559649
5	15	15--2	3.1	8	0.605469
5	15	15--2	3.1	8.4	0.523027
5	15	15--2	3.1	8	0.605469
5	15	15--2	3	7.9	0.608471
5	15	15--2	2.8	7.5	0.663704
5	15	15--2	2.8	7.5	0.663704
5	15	15--2	2.8	7.7	0.613318
5	15	15--2	2.3	7.4	0.567587
5	15	15--3	4.1	8.6	0.644597
5	15	15--3	4.1	8	0.800781
5	15	15--3	3.9	8.4	0.658001
5	15	15--3	3.8	8.5	0.618767
5	15	15--3	3.7	8.4	0.624258
5	15	15--3	3.6	8.5	0.5862
5	15	15--3	3.6	8.3	0.629605
5	15	15--3	3.5	8.3	0.612116
5	15	15--3	3.4	8.2	0.616648
5	15	15--3	3.4	8.1	0.63977
5	15	15--3	3.4	8.2	0.616648
5	15	15--3	3.3	8.5	0.53735
5	15	15--3	3.2	8	0.625
5	15	15--3	3.2	7.5	0.758519
5	15	15--3	3.2	7.9	0.649036
5	15	15--3	3.1	7.7	0.679031
5	15	15--3	3	7.9	0.608471
5	15	15--3	3	7.9	0.608471
5	15	15--3	3	8.4	0.506155
5	15	15--3	2.6	8	0.507812
26	7	7--1	3.7	8.3	0.647094
26	7	7--1	3.5	7.8	0.737538
26	7	7--1	3.4	8	0.664062
26	7	7--1	3.4	7.8	0.716465
26	7	7--1	3.3	8.1	0.620953
26	7	7--1	3.3	8.3	0.577138
26	7	7--1	3.3	8.4	0.55677
26	7	7--1	3.1	8	0.605469
26	7	7--1	3.1	7.7	0.679031
26	7	7--1	3.1	7.8	0.653248
26	7	7--1	3	7.7	0.657127
26	7	7--1	2.9	7.8	0.611103
26	7	7--1	2.9	7.7	0.635222
26	7	7--1	2.9	7.5	0.687407
26	7	7--1	2.9	7.3	0.745469
26	7	7--1	2.8	7.5	0.663704
26	7	7--1	2.6	7.3	0.668351
26	7	7--1	2.5	7.4	0.616943
26	7	7--1	2.5	7.5	0.592593
26	7	7--1	2.4	7.5	0.568889
26	7	7--2	3.8	8.3	0.664583
26	7	7--2	3.8	8.3	0.664583
26	7	7--2	3.8	8.2	0.689195
26	7	7--2	3.7	8.3	0.647094
26	7	7--2	3.5	8.3	0.612116
26	7	7--2	3.4	8.6	0.534544
26	7	7--2	3.4	8.2	0.616648
26	7	7--2	3.4	8.3	0.594627
26	7	7--2	3.3	8	0.644531
26	7	7--2	3.3	8	0.644531
26	7	7--2	3.3	7.7	0.722839
26	7	7--2	3.3	8.2	0.598511
26	7	7--2	3.3	7.5	0.782222
26	7	7--2	3.2	7.5	0.758519
26	7	7--2	3.1	7.6	0.706189
26	7	7--2	3	7.8	0.632175
26	7	7--2	3	7.7	0.657127
26	7	7--2	2.9	7.9	0.588189
26	7	7--2	2.8	7.8	0.59003
26	7	7--2	2.6	7.4	0.64162
26	7	7--3	3.9	8.5	0.63505
26	7	7--3	3.6	8.5	0.5862
26	7	7--3	3.5	8.1	0.658587
26	7	7--3	3.4	8	0.664062
26	7	7--3	3.4	8.1	0.63977
26	7	7--3	3.3	8	0.644531
26	7	7--3	3.2	7.7	0.700935
26	7	7--3	3.2	7.7	0.700935
26	7	7--3	3.2	8	0.625
26	7	7--3	3.2	7.3	0.822586
26	7	7--3	3.1	7.9	0.628754
26	7	7--3	3	7.6	0.683409
26	7	7--3	3	7.7	0.657127
26	7	7--3	3	7.6	0.683409
26	7	7--3	3	7.7	0.657127
26	7	7--3	3	8	0.585938
26	7	7--3	2.7	7.8	0.568958
26	7	7--3	2.5	7.1	0.698498
26	7	7--3	2.5	7.2	0.669796
26	7	7--3	2.4	7	0.699708
26	15	15--1	5.6	9.3	0.696208
26	15	15--1	5.5	9.6	0.621654
26	15	15--1	5.5	9.2	0.706316
26	15	15--1	5.1	9.5	0.594839
26	15	15--1	5	9.2	0.642106
26	15	15--1	4.9	8.7	0.744112
26	15	15--1	4.9	9	0.672154
26	15	15--1	4.7	8.5	0.765317
26	15	15--1	4.7	9.1	0.623697
26	15	15--1	4.6	8.9	0.652511
26	15	15--1	4.6	9.3	0.571885
26	15	15--1	4.5	8.7	0.683368
26	15	15--1	4.5	8.8	0.660335
26	15	15--1	4.5	8.8	0.660335
26	15	15--1	4.4	8.5	0.716467
26	15	15--1	4.3	8.6	0.676041
26	15	15--1	4.3	8.6	0.676041
26	15	15--1	4.3	8.2	0.779878
26	15	15--1	3.6	8.5	0.5862
26	15	15--1	3.6	8.1	0.677404
26	15	15--2	6.3	9.6	0.712077
26	15	15--2	5.9	9.3	0.733505
26	15	15--2	5.9	9.9	0.60806
26	15	15--2	5.7	9.1	0.756399
26	15	15--2	5.2	9.1	0.690048
26	15	15--2	5.2	8.3	0.90943
26	15	15--2	5.1	9.4	0.614026
26	15	15--2	4.8	8.8	0.704358
26	15	15--2	4.7	8.5	0.765317
26	15	15--2	4.6	8.8	0.675009
26	15	15--2	4.5	8.5	0.73275
26	15	15--2	4.5	9	0.617284
26	15	15--2	4.2	9	0.576132
26	15	15--2	4.2	8.5	0.6839
26	15	15--2	4.1	9.4	0.493629
26	15	15--2	4	8.5	0.651333
26	15	15--2	4	8.3	0.699561
26	15	15--2	4	8.6	0.628875
26	15	15--2	3.5	8.2	0.634785
26	15	15--2	3.1	7.9	0.628754
26	15	15--3	6.9	9.9	0.711121
26	15	15--3	6.8	9.6	0.768591
26	15	15--3	6.2	9.5	0.723137
26	15	15--3	5.9	9.5	0.688147
26	15	15--3	5.5	9	0.754458
26	15	15--3	5.4	9.3	0.671344
26	15	15--3	5.1	8.8	0.74838
26	15	15--3	5.1	9.5	0.594839
26	15	15--3	4.9	8.8	0.719032
26	15	15--3	4.9	9	0.672154
26	15	15--3	4.9	9.5	0.571512
26	15	15--3	4.8	9.1	0.636967
26	15	15--3	4.7	9.1	0.623697
26	15	15--3	4.7	9	0.644719
26	15	15--3	4.6	8.9	0.652511
26	15	15--3	4.4	9	0.603567
26	15	15--3	4.4	9.5	0.513194
26	15	15--3	4.3	8.7	0.652996
26	15	15--3	4.1	8.4	0.691745
26	15	15--3	4.1	9	0.562414
33	7	7--1	3.8	8.4	0.641129
33	7	7--1	3.6	8.1	0.677404
33	7	7--1	3.5	8.5	0.569917
33	7	7--1	3.5	8.3	0.612116
33	7	7--1	3.5	8.1	0.658587
33	7	7--1	3.5	8.3	0.612116
33	7	7--1	3.3	8	0.644531
33	7	7--1	3.2	7.4	0.789687
33	7	7--1	3.2	8	0.625
33	7	7--1	3.2	7.6	0.728969
33	7	7--1	3.2	7.7	0.700935
33	7	7--1	3.2	7.6	0.728969
33	7	7--1	3.1	7.6	0.706189
33	7	7--1	3.1	7.7	0.679031
33	7	7--1	3	7.4	0.740331
33	7	7--1	3	7.7	0.657127
33	7	7--1	2.9	7.5	0.687407
33	7	7--1	2.9	7.5	0.687407
33	7	7--1	2.6	7.8	0.547885
33	7	7--1	2.6	7.8	0.547885
33	7	7--2	4.4	8.5	0.716467
33	7	7--2	4.1	8.5	0.667617
33	7	7--2	4	8.6	0.628875
33	7	7--2	4	8.5	0.651333
33	7	7--2	3.8	8.3	0.664583
33	7	7--2	3.8	8.5	0.618767
33	7	7--2	3.8	8.8	0.557616
33	7	7--2	3.6	8.4	0.607386
33	7	7--2	3.6	8.4	0.607386
33	7	7--2	3.5	8.5	0.569917
33	7	7--2	3.4	7.7	0.744744
33	7	7--2	3.4	7.8	0.716465
33	7	7--2	3.4	7.9	0.689601
33	7	7--2	3.4	7.7	0.744744
33	7	7--2	3.3	8.1	0.620953
33	7	7--2	3.3	8	0.644531
33	7	7--2	3.2	7.7	0.700935
33	7	7--2	3.1	7.7	0.679031
33	7	7--2	3	8.2	0.544101
33	7	7--2	2.8	7.5	0.663704
33	7	7--3	4.1	8.7	0.622624
33	7	7--3	3.9	8.5	0.63505
33	7	7--3	3.7	8.1	0.69622
33	7	7--3	3.7	8.3	0.647094
33	7	7--3	3.5	8.1	0.658587
33	7	7--3	3.5	8.4	0.590514
33	7	7--3	3.5	8.3	0.612116
33	7	7--3	3.4	8.1	0.63977
33	7	7--3	3.4	7.7	0.744744
33	7	7--3	3.3	8	0.644531
33	7	7--3	3.2	8.2	0.580375
33	7	7--3	3.2	8	0.625
33	7	7--3	3.1	7.7	0.679031
33	7	7--3	3.1	8	0.605469
33	7	7--3	3.1	7.8	0.653248
33	7	7--3	3	7.6	0.683409
33	7	7--3	3	8	0.585938
33	7	7--3	2.6	7.5	0.616296
33	7	7--3	2.4	7.5	0.568889
33	7	7--3	2.3	7.4	0.567587
33	15	15--1	6.4	9.6	0.72338
33	15	15--1	5.8	10	0.58
33	15	15--1	5.8	9.7	0.635496
33	15	15--1	5.3	9.3	0.658911
33	15	15--1	5.3	9.5	0.618166
33	15	15--1	5.2	9.8	0.552491
33	15	15--1	5	9.5	0.583175
33	15	15--1	5	9.5	0.583175
33	15	15--1	4.9	9.1	0.650237
33	15	15--1	4.8	9.2	0.616421
33	15	15--1	4.7	9.3	0.584318
33	15	15--1	4.6	9.3	0.571885
33	15	15--1	4.6	9.1	0.610427
33	15	15--1	4.6	9.2	0.590737
33	15	15--1	4.5	8.9	0.638326
33	15	15--1	4.4	9.1	0.583887
33	15	15--1	4.3	8.9	0.609956
33	15	15--1	4.3	9	0.589849
33	15	15--1	4	8.5	0.651333
33	15	15--1	3.6	8.8	0.528268
33	15	15--2	6.7	10.2	0.631356
33	15	15--2	6.4	10.2	0.603086
33	15	15--2	6.3	10	0.63
33	15	15--2	6.3	9.5	0.734801
33	15	15--2	5.9	9.7	0.646453
33	15	15--2	5.6	9.5	0.653156
33	15	15--2	5.4	9.5	0.629829
33	15	15--2	5.4	9.1	0.716588
33	15	15--2	5.2	9.3	0.646479
33	15	15--2	5	9.5	0.583175
33	15	15--2	5	9	0.685871
33	15	15--2	4.9	9.1	0.650237
33	15	15--2	4.7	9.2	0.603579
33	15	15--2	4.6	8.5	0.749033
33	15	15--2	4.5	9.6	0.508626
33	15	15--2	4.4	8.5	0.716467
33	15	15--2	4.2	9	0.576132
33	15	15--2	4.2	9	0.576132
33	15	15--2	3.8	8.6	0.597432
33	15	15--2	3.1	8.3	0.54216
33	15	15--3	7.4	10.1	0.718237
33	15	15--3	7.3	10.3	0.668053
33	15	15--3	6.3	10	0.63
33	15	15--3	6.2	9.5	0.723137
33	15	15--3	6.1	9.6	0.689471
33	15	15--3	5.9	9.6	0.666866
33	15	15--3	5.5	10	0.55
33	15	15--3	5.3	9.3	0.658911
33	15	15--3	5.1	9.4	0.614026
33	15	15--3	5.1	9.2	0.654948
33	15	15--3	5	9.5	0.583175
33	15	15--3	5	9.4	0.601986
33	15	15--3	4.9	9.6	0.553838
33	15	15--3	4.9	9.5	0.571512
33	15	15--3	4.7	8.5	0.765317
33	15	15--3	4.7	9.3	0.584318
33	15	15--3	4.6	9.1	0.610427
33	15	15--3	4.4	9.2	0.565053
33	15	15--3	4.2	9.1	0.557346
33	15	15--3	4.2	8.5	0.6839
41	7	7--1	4	8.1	0.752671
41	7	7--1	3.9	8.6	0.613154
41	7	7--1	3.7	8.5	0.602483
41	7	7--1	3.7	8.3	0.647094
41	7	7--1	3.6	7.9	0.730165
41	7	7--1	3.6	8.4	0.607386
41	7	7--1	3.6	8.5	0.5862
41	7	7--1	3.4	8.1	0.63977
41	7	7--1	3.3	8	0.644531
41	7	7--1	3.3	7.7	0.722839
41	7	7--1	3.3	8	0.644531
41	7	7--1	3.3	8	0.644531
41	7	7--1	3.3	7.9	0.669318
41	7	7--1	3.2	7.5	0.758519
41	7	7--1	3.2	7.5	0.758519
41	7	7--1	3.1	8	0.605469
41	7	7--1	3	7.5	0.711111
41	7	7--1	2.9	7.5	0.687407
41	7	7--1	2.8	7.9	0.567906
41	7	7--1	2.7	7.7	0.591414
41	7	7--2	4.4	8.7	0.668182
41	7	7--2	4.3	8.7	0.652996
41	7	7--2	4.1	8.8	0.601639
41	7	7--2	4.1	8.6	0.644597
41	7	7--2	4	8.2	0.725468
41	7	7--2	4	9	0.548697
41	7	7--2	4	8.6	0.628875
41	7	7--2	3.9	7.7	0.854265
41	7	7--2	3.8	8.6	0.597432
41	7	7--2	3.8	8.2	0.689195
41	7	7--2	3.8	8.5	0.618767
41	7	7--2	3.7	7.9	0.750448
41	7	7--2	3.7	8.5	0.602483
41	7	7--2	3.6	8	0.703125
41	7	7--2	3.4	8	0.664062
41	7	7--2	3.3	8.2	0.598511
41	7	7--2	3.3	8	0.644531
41	7	7--2	3.3	8	0.644531
41	7	7--2	3.2	7.8	0.67432
41	7	7--2	2.9	7.7	0.635222
41	7	7--3	4.3	8.7	0.652996
41	7	7--3	4.1	8.6	0.644597
41	7	7--3	4	8.4	0.674873
41	7	7--3	3.9	8.5	0.63505
41	7	7--3	3.8	8.3	0.664583
41	7	7--3	3.6	8.4	0.607386
41	7	7--3	3.6	8.6	0.565988
41	7	7--3	3.5	8.1	0.658587
41	7	7--3	3.5	8.2	0.634785
41	7	7--3	3.4	8.2	0.616648
41	7	7--3	3.4	8	0.664062
41	7	7--3	3.4	8	0.664062
41	7	7--3	3.3	8.2	0.598511
41	7	7--3	3.2	8	0.625
41	7	7--3	3.2	8	0.625
41	7	7--3	3.2	8	0.625
41	7	7--3	3	7.8	0.632175
41	7	7--3	2.9	7.5	0.687407
41	7	7--3	2.7	7.5	0.64
41	7	7--3	2.6	7.7	0.56951
41	15	15--1	7.5	10.2	0.706742
41	15	15--1	6.7	10.2	0.631356
41	15	15--1	6.5	10.5	0.561494
41	15	15--1	6	10.1	0.582354
41	15	15--1	5.9	9.9	0.60806
41	15	15--1	5.7	10.2	0.537124
41	15	15--1	5.3	9.5	0.618166
41	15	15--1	5.3	9.4	0.638105
41	15	15--1	5.2	9.7	0.569755
41	15	15--1	5	9.4	0.601986
41	15	15--1	5	9.5	0.583175
41	15	15--1	4.9	9.5	0.571512
41	15	15--1	4.8	9.4	0.577907
41	15	15--1	4.8	9.5	0.559848
41	15	15--1	4.8	9	0.658436
41	15	15--1	4.7	9	0.644719
41	15	15--1	4.6	9	0.631001
41	15	15--1	4.6	9.1	0.610427
41	15	15--1	4.3	8.4	0.725489
41	15	15--1	3.9	8.7	0.592252
41	15	15--2	7.9	10.5	0.682432
41	15	15--2	7.6	10.1	0.737649
41	15	15--2	7.3	10.8	0.579498
41	15	15--2	7.3	10.4	0.648967
41	15	15--2	6.7	10.1	0.650295
41	15	15--2	6.3	10.2	0.593663
41	15	15--2	6.3	9.7	0.69028
41	15	15--2	6.2	10	0.62
41	15	15--2	6	10	0.6
41	15	15--2	6	10.7	0.489779
41	15	15--2	5.5	9.5	0.641493
41	15	15--2	5.4	9.5	0.629829
41	15	15--2	5.4	9.1	0.716588
41	15	15--2	5.3	9.5	0.618166
41	15	15--2	5.1	8.7	0.774484
41	15	15--2	5	9.5	0.583175
41	15	15--2	5	9.6	0.56514
41	15	15--2	4.6	9.1	0.610427
41	15	15--2	4.2	9	0.576132
41	15	15--2	3.3	8.5	0.53735
41	15	15--3	8.7	10.5	0.751539
41	15	15--3	8.4	10.5	0.725624
41	15	15--3	7.2	10	0.72
41	15	15--3	6.9	10.3	0.631448
41	15	15--3	6.7	9.9	0.690509
41	15	15--3	6.6	10.2	0.621933
41	15	15--3	6.4	10.3	0.585691
41	15	15--3	5.6	9.6	0.632957
41	15	15--3	5.5	9.5	0.641493
41	15	15--3	5.5	9.5	0.641493
41	15	15--3	5.5	9.5	0.641493
41	15	15--3	5.4	9.6	0.610352
41	15	15--3	5.2	9.9	0.535917
41	15	15--3	5.1	9.2	0.654948
41	15	15--3	5	9.6	0.56514
41	15	15--3	5	9.5	0.583175
41	15	15--3	4.9	9	0.672154
41	15	15--3	4.7	9.5	0.548185
41	15	15--3	4.5	9.5	0.524858
41	15	15--3	4.3	8.8	0.630987
48	7	7--1	4.1	7.9	0.831577
48	7	7--1	4.1	8	0.800781
48	7	7--1	3.9	8	0.761719
48	7	7--1	3.9	8	0.761719
48	7	7--1	3.8	8.5	0.618767
48	7	7--1	3.6	8.3	0.629605
48	7	7--1	3.4	7.5	0.805926
48	7	7--1	3.4	8	0.664062
48	7	7--1	3.4	8.3	0.594627
48	7	7--1	3.4	8.1	0.63977
48	7	7--1	3.3	8.1	0.620953
48	7	7--1	3.2	7.5	0.758519
48	7	7--1	3.2	8.3	0.559649
48	7	7--1	3.2	7.9	0.649036
48	7	7--1	3.1	7	0.90379
48	7	7--1	3	7.5	0.711111
48	7	7--1	3	7.6	0.683409
48	7	7--1	3	7	0.874636
48	7	7--1	2.7	8	0.527344
48	7	7--1	2.6	7	0.758017
48	7	7--2	4.6	8.1	0.865571
48	7	7--2	4.5	8.5	0.73275
48	7	7--2	4.3	8	0.839844
48	7	7--2	4.2	8.1	0.790304
48	7	7--2	4.2	8.3	0.734539
48	7	7--2	4.1	8.1	0.771487
48	7	7--2	4.1	8	0.800781
48	7	7--2	4	8.2	0.725468
48	7	7--2	4	8.5	0.651333
48	7	7--2	3.9	8.5	0.63505
48	7	7--2	3.8	8.6	0.597432
48	7	7--2	3.8	8	0.742188
48	7	7--2	3.7	8.1	0.69622
48	7	7--2	3.7	7.9	0.750448
48	7	7--2	3.7	8.2	0.671058
48	7	7--2	3.4	8.2	0.616648
48	7	7--2	3.4	7.6	0.77453
48	7	7--2	3.4	8.3	0.594627
48	7	7--2	3.3	7.9	0.669318
48	7	7--2	3	8	0.585938
48	7	7--3	4.3	8.9	0.609956
48	7	7--3	4.3	8	0.839844
48	7	7--3	4.1	8.5	0.667617
48	7	7--3	4	8.6	0.628875
48	7	7--3	3.8	8.2	0.689195
48	7	7--3	3.8	8.4	0.641129
48	7	7--3	3.7	8.2	0.671058
48	7	7--3	3.7	8.5	0.602483
48	7	7--3	3.7	8.2	0.671058
48	7	7--3	3.6	8.1	0.677404
48	7	7--3	3.5	8.5	0.569917
48	7	7--3	3.5	8.1	0.658587
48	7	7--3	3.4	8.2	0.616648
48	7	7--3	3.4	8.1	0.63977
48	7	7--3	3.3	8.5	0.53735
48	7	7--3	3.3	8.1	0.620953
48	7	7--3	3.1	7.6	0.706189
48	7	7--3	2.7	8	0.527344
48	7	7--3	2.6	7.8	0.547885
48	7	7--3	2.3	8	0.449219
48	15	15--1	8.3	10.5	0.716985
48	15	15--1	7.1	10.5	0.613325
48	15	15--1	7	10.7	0.571409
48	15	15--1	6.9	10	0.69
48	15	15--1	5.9	10.8	0.468361
48	15	15--1	5.8	10.6	0.486979
48	15	15--1	5.6	9.3	0.696208
48	15	15--1	5.5	9.2	0.706316
48	15	15--1	5.4	9.3	0.671344
48	15	15--1	5.3	9.5	0.618166
48	15	15--1	5.1	9.5	0.594839
48	15	15--1	5.1	9.6	0.576443
48	15	15--1	5.1	10.1	0.495001
48	15	15--1	5.1	9.4	0.614026
48	15	15--1	4.9	9.1	0.650237
48	15	15--1	4.8	10.1	0.465883
48	15	15--1	4.8	10.1	0.465883
48	15	15--1	4.8	9.3	0.59675
48	15	15--1	4	8.6	0.628875
48	15	15--1	4	10	0.4
48	15	15--2	8.9	10.9	0.687243
48	15	15--2	8.7	10.4	0.773427
48	15	15--2	8.7	10.6	0.730469
48	15	15--2	8.2	10	0.82
48	15	15--2	8	10.6	0.671695
48	15	15--2	7.6	10.1	0.737649
48	15	15--2	6.9	10.6	0.579337
48	15	15--2	6.8	10.5	0.58741
48	15	15--2	6.6	10	0.66
48	15	15--2	6.5	10.4	0.577848
48	15	15--2	5.8	9.2	0.744843
48	15	15--2	5.8	9.2	0.744843
48	15	15--2	5.8	10.5	0.501026
48	15	15--2	5.7	10	0.57
48	15	15--2	5.7	10.5	0.492387
48	15	15--2	5.5	10.5	0.475111
48	15	15--2	5.3	9	0.727023
48	15	15--2	4.9	10.4	0.435608
48	15	15--2	4.3	9.7	0.471144
48	15	15--2	3.4	9	0.466392
48	15	15--3	9.7	10.6	0.814431
48	15	15--3	9	11.6	0.576592
48	15	15--3	7.7	10.5	0.665155
48	15	15--3	7.5	10.3	0.686356
48	15	15--3	7.2	10.3	0.658902
48	15	15--3	7.2	10.2	0.678472
48	15	15--3	6.8	10.5	0.58741
48	15	15--3	6.2	9.3	0.770802
48	15	15--3	6.1	9.5	0.711474
48	15	15--3	5.9	10.6	0.495375
48	15	15--3	5.8	10.5	0.501026
48	15	15--3	5.7	10.1	0.553236
48	15	15--3	5.7	9.5	0.66482
48	15	15--3	5.3	9.3	0.658911
48	15	15--3	5.2	9.6	0.587746
48	15	15--3	5.2	9.5	0.606502
48	15	15--3	5	9.6	0.56514
48	15	15--3	5	10.5	0.431919
48	15	15--3	4.7	10.3	0.430117
48	15	15--3	4.4	10	0.44
55	7	7--1	4	8.5	0.651333
55	7	7--1	4	8.6	0.628875
55	7	7--1	3.9	8.1	0.733854
55	7	7--1	3.9	8.2	0.707332
55	7	7--1	3.9	8	0.761719
55	7	7--1	3.7	8.4	0.624258
55	7	7--1	3.7	8.4	0.624258
55	7	7--1	3.6	8	0.703125
55	7	7--1	3.5	8.2	0.634785
55	7	7--1	3.5	8	0.683594
55	7	7--1	3.4	8.1	0.63977
55	7	7--1	3.4	8.1	0.63977
55	7	7--1	3.3	7.8	0.695393
55	7	7--1	3.3	7.6	0.75175
55	7	7--1	3.1	7.9	0.628754
55	7	7--1	3	7.6	0.683409
55	7	7--1	3	8	0.585938
55	7	7--1	3	7.6	0.683409
55	7	7--1	2.9	8	0.566406
55	7	7--1	2.5	7.5	0.592593
55	7	7--2	4.9	8.5	0.797883
55	7	7--2	4.7	8.8	0.689684
55	7	7--2	4.6	8.5	0.749033
55	7	7--2	4.4	9	0.603567
55	7	7--2	4.3	8.1	0.809121
55	7	7--2	4.2	8.5	0.6839
55	7	7--2	4.2	8.5	0.6839
55	7	7--2	4.1	8.6	0.644597
55	7	7--2	4.1	8.8	0.601639
55	7	7--2	4	8.6	0.628875
55	7	7--2	3.9	8.1	0.733854
55	7	7--2	3.9	8.5	0.63505
55	7	7--2	3.9	8.5	0.63505
55	7	7--2	3.8	8	0.742188
55	7	7--2	3.6	8.1	0.677404
55	7	7--2	3.5	8	0.683594
55	7	7--2	3.5	8.5	0.569917
55	7	7--2	3.4	8.3	0.594627
55	7	7--2	3.4	8	0.664062
55	7	7--2	3	7.9	0.608471
55	7	7--3	4.7	9	0.644719
55	7	7--3	4.5	8.5	0.73275
55	7	7--3	4.4	8.5	0.716467
55	7	7--3	4.3	8.5	0.700183
55	7	7--3	4.3	8.8	0.630987
55	7	7--3	3.9	8.4	0.658001
55	7	7--3	3.8	8.5	0.618767
55	7	7--3	3.8	8.5	0.618767
55	7	7--3	3.8	8.2	0.689195
55	7	7--3	3.7	8	0.722656
55	7	7--3	3.7	8.3	0.647094
55	7	7--3	3.7	8.3	0.647094
55	7	7--3	3.6	8.5	0.5862
55	7	7--3	3.5	8.2	0.634785
55	7	7--3	3.4	8.2	0.616648
55	7	7--3	3.3	7.8	0.695393
55	7	7--3	3.3	8	0.644531
55	7	7--3	3	7.5	0.711111
55	7	7--3	3	8	0.585938
55	7	7--3	3	7.5	0.711111
55	15	15--1	9.1	10.8	0.722387
55	15	15--1	7.8	10.1	0.75706
55	15	15--1	7.3	10.8	0.579498
55	15	15--1	7.1	10.5	0.613325
55	15	15--1	6.6	10.3	0.603993
55	15	15--1	6.6	9.8	0.701238
55	15	15--1	6.2	10.5	0.535579
55	15	15--1	6	10	0.6
55	15	15--1	6	9.9	0.618366
55	15	15--1	5.9	10.3	0.539934
55	15	15--1	5.5	9.6	0.621654
55	15	15--1	5.5	9.9	0.566836
55	15	15--1	5.3	9.7	0.580712
55	15	15--1	5.2	9.4	0.626066
55	15	15--1	5.2	10	0.52
55	15	15--1	5.2	9.5	0.606502
55	15	15--1	5.1	9.5	0.594839
55	15	15--1	5	9.5	0.583175
55	15	15--1	4.5	8.9	0.638326
55	15	15--1	3.8	8.9	0.539031
55	15	15--2	9.4	10.7	0.76732
55	15	15--2	9.2	11	0.69121
55	15	15--2	9.1	11.4	0.614224
55	15	15--2	8.5	11.5	0.558889
55	15	15--2	8.2	10.9	0.63319
55	15	15--2	7.7	11	0.578512
55	15	15--2	7.4	10.4	0.657857
55	15	15--2	7.3	10.6	0.612922
55	15	15--2	7.3	10.3	0.668053
55	15	15--2	7	10.4	0.622297
55	15	15--2	6.6	10	0.66
55	15	15--2	6.5	10	0.65
55	15	15--2	6.2	9.9	0.638978
55	15	15--2	6.2	10.5	0.535579
55	15	15--2	6	10	0.6
55	15	15--2	5.8	10	0.58
55	15	15--2	5.7	9.3	0.708641
55	15	15--2	5	9.5	0.583175
55	15	15--2	4.4	9.2	0.565053
55	15	15--2	3.8	8.6	0.597432
55	15	15--3	11	11.5	0.723268
55	15	15--3	10	11.5	0.657516
55	15	15--3	8.7	10.9	0.6718
55	15	15--3	8	10.6	0.671695
55	15	15--3	7.9	11	0.593539
55	15	15--3	7.6	11	0.570999
55	15	15--3	7.4	10.4	0.657857
55	15	15--3	6.6	10.1	0.640589
55	15	15--3	6.4	10.3	0.585691
55	15	15--3	6.3	10.1	0.611472
55	15	15--3	6.2	10.4	0.551178
55	15	15--3	5.9	10.3	0.539934
55	15	15--3	5.8	10	0.58
55	15	15--3	5.7	9.7	0.624539
55	15	15--3	5.6	9.5	0.653156
55	15	15--3	5.6	9.4	0.674224
55	15	15--3	5.5	10.1	0.533825
55	15	15--3	5.4	10	0.54
55	15	15--3	5.2	9.7	0.569755
55	15	15--3	5.1	9.4	0.614026
63	7	7--1	4.3	8.7	0.652996
63	7	7--1	4.2	8.6	0.660319
63	7	7--1	4.1	8.1	0.771487
63	7	7--1	4.1	8.5	0.667617
63	7	7--1	4	8.6	0.628875
63	7	7--1	4	8.4	0.674873
63	7	7--1	4	8.9	0.567401
63	7	7--1	3.9	8.2	0.707332
63	7	7--1	3.7	8.1	0.69622
63	7	7--1	3.6	8	0.703125
63	7	7--1	3.5	8.2	0.634785
63	7	7--1	3.5	8	0.683594
63	7	7--1	3.5	8	0.683594
63	7	7--1	3.4	7.9	0.689601
63	7	7--1	3.3	8	0.644531
63	7	7--1	3.3	7.9	0.669318
63	7	7--1	3.2	7.8	0.67432
63	7	7--1	3.2	8	0.625
63	7	7--1	3.2	8.4	0.539898
63	7	7--1	2.6	7.5	0.616296
63	7	7--2	5	9	0.685871
63	7	7--2	5	9	0.685871
63	7	7--2	5	9	0.685871
63	7	7--2	4.6	9.2	0.590737
63	7	7--2	4.5	8	0.878906
63	7	7--2	4.4	9	0.603567
63	7	7--2	4.3	8.8	0.630987
63	7	7--2	4.3	8.7	0.652996
63	7	7--2	4.2	8.7	0.63781
63	7	7--2	4.1	8.8	0.601639
63	7	7--2	4.1	8.4	0.691745
63	7	7--2	4	8.2	0.725468
63	7	7--2	4	8.7	0.607438
63	7	7--2	4	8.6	0.628875
63	7	7--2	4	8.9	0.567401
63	7	7--2	3.9	8.4	0.658001
63	7	7--2	3.8	8.3	0.664583
63	7	7--2	3.7	8.3	0.647094
63	7	7--2	3.6	8	0.703125
63	7	7--2	3.2	7.9	0.649036
63	7	7--3	5.2	9.3	0.646479
63	7	7--3	4.9	9.9	0.504999
63	7	7--3	4.7	8.7	0.71374
63	7	7--3	4.5	8.8	0.660335
63	7	7--3	4.2	8.5	0.6839
63	7	7--3	4.2	8.6	0.660319
63	7	7--3	4.2	8.8	0.616313
63	7	7--3	4.1	8.7	0.622624
63	7	7--3	4.1	8.5	0.667617
63	7	7--3	4	8.6	0.628875
63	7	7--3	3.9	8.4	0.658001
63	7	7--3	3.8	8.6	0.597432
63	7	7--3	3.8	8.5	0.618767
63	7	7--3	3.7	8.4	0.624258
63	7	7--3	3.7	8.3	0.647094
63	7	7--3	3.6	8.1	0.677404
63	7	7--3	3.6	8.3	0.629605
63	7	7--3	3.3	7.9	0.669318
63	7	7--3	3	8	0.585938
63	7	7--3	2.9	7.2	0.776963
63	15	15--1	8.3	11.3	0.575232
63	15	15--1	8.2	11	0.616078
63	15	15--1	7	10.6	0.587733
63	15	15--1	7	10.6	0.587733
63	15	15--1	6.7	10.7	0.54692
63	15	15--1	6.5	10.4	0.577848
63	15	15--1	6.4	10	0.64
63	15	15--1	6.3	10	0.63
63	15	15--1	6.1	10	0.61
63	15	15--1	6	9.6	0.678168
63	15	15--1	6	10.1	0.582354
63	15	15--1	5.9	10.3	0.539934
63	15	15--1	5.9	9.9	0.60806
63	15	15--1	5.7	9.8	0.605615
63	15	15--1	5.5	9.6	0.621654
63	15	15--1	5.5	10	0.55
63	15	15--1	5.2	9.5	0.606502
63	15	15--1	5	9	0.685871
63	15	15--1	4.6	11.1	0.336348
63	15	15--1	4.2	9.2	0.539369
63	15	15--2	10.8	11.8	0.657321
63	15	15--2	10.1	11.5	0.664091
63	15	15--2	9.9	12	0.572917
63	15	15--2	9.5	11.5	0.62464
63	15	15--2	8.9	11.2	0.633484
63	15	15--2	8.7	8.9	1.2341
63	15	15--2	8.4	11.1	0.614201
63	15	15--2	8.1	10.5	0.699708
63	15	15--2	8.1	10.6	0.680092
63	15	15--2	7.6	10.1	0.737649
63	15	15--2	7.6	10.7	0.620386
63	15	15--2	7.2	10.4	0.640077
63	15	15--2	7.1	10.4	0.631187
63	15	15--2	7.1	10.5	0.613325
63	15	15--2	7	10.8	0.555683
63	15	15--2	6.5	9.6	0.734682
63	15	15--2	6.5	10.4	0.577848
63	15	15--2	5.6	10	0.56
63	15	15--2	4.8	11.5	0.315608
63	15	15--2	4.5	9.5	0.524858
63	15	15--3	11.5	13	0.523441
63	15	15--3	11.1	11.6	0.71113
63	15	15--3	10	11.4	0.674972
63	15	15--3	9.5	11.3	0.658398
63	15	15--3	9.2	10.4	0.817877
63	15	15--3	9	10.5	0.777454
63	15	15--3	8.9	11.2	0.633484
63	15	15--3	8	10.5	0.69107
63	15	15--3	7.4	9.3	0.91999
63	15	15--3	6.9	10.5	0.596048
63	15	15--3	6.7	10.5	0.578771
63	15	15--3	6.5	10.1	0.630884
63	15	15--3	6.4	10.5	0.552856
63	15	15--3	6.3	9.5	0.734801
63	15	15--3	6.2	12	0.358796
63	15	15--3	6.2	10	0.62
63	15	15--3	5.9	9.9	0.60806
63	15	15--3	5.9	10.1	0.572648
63	15	15--3	5.8	10.2	0.546547
63	15	15--3	5.3	9.5	0.618166
70	7	7--1	4.4	8.9	0.624141
70	7	7--1	4.2	9	0.576132
70	7	7--1	4.2	8.4	0.708617
70	7	7--1	4.2	8.5	0.6839
70	7	7--1	4.1	8.2	0.743605
70	7	7--1	4.1	8.6	0.644597
70	7	7--1	4.1	8.5	0.667617
70	7	7--1	3.9	7.8	0.821828
70	7	7--1	3.8	8.3	0.664583
70	7	7--1	3.7	8.4	0.624258
70	7	7--1	3.6	8.2	0.652921
70	7	7--1	3.6	8	0.703125
70	7	7--1	3.5	8.3	0.612116
70	7	7--1	3.4	7.9	0.689601
70	7	7--1	3.3	8.1	0.620953
70	7	7--1	3.3	7.7	0.722839
70	7	7--1	3.3	7.5	0.782222
70	7	7--1	3.2	7.9	0.649036
70	7	7--1	3.1	8	0.605469
70	7	7--1	2.7	7.6	0.615068
70	7	7--2	5.4	9	0.740741
70	7	7--2	5.3	9	0.727023
70	7	7--2	5.1	9	0.699588
70	7	7--2	4.7	9.3	0.584318
70	7	7--2	4.6	8.1	0.865571
70	7	7--2	4.5	8.9	0.638326
70	7	7--2	4.5	8.8	0.660335
70	7	7--2	4.5	9	0.617284
70	7	7--2	4.4	9	0.603567
70	7	7--2	4.4	8.4	0.74236
70	7	7--2	4.4	8.9	0.624141
70	7	7--2	4.2	8.7	0.63781
70	7	7--2	4.1	8	0.800781
70	7	7--2	4	8.9	0.567401
70	7	7--2	4	8.5	0.651333
70	7	7--2	3.9	8.5	0.63505
70	7	7--2	3.7	8	0.722656
70	7	7--2	3.7	8.4	0.624258
70	7	7--2	3.5	8.4	0.590514
70	7	7--2	3.2	8.1	0.602136
70	7	7--3	5.4	9.1	0.716588
70	7	7--3	5	8.8	0.733706
70	7	7--3	4.7	9	0.644719
70	7	7--3	4.6	8.2	0.834289
70	7	7--3	4.6	8.5	0.749033
70	7	7--3	4.4	8.8	0.645661
70	7	7--3	4.2	8.5	0.6839
70	7	7--3	4.2	8.5	0.6839
70	7	7--3	4.1	8.5	0.667617
70	7	7--3	4.1	8.5	0.667617
70	7	7--3	4	8.5	0.651333
70	7	7--3	4	8.7	0.607438
70	7	7--3	4	8.5	0.651333
70	7	7--3	3.8	8.3	0.664583
70	7	7--3	3.7	8.3	0.647094
70	7	7--3	3.7	8.5	0.602483
70	7	7--3	3.5	8.2	0.634785
70	7	7--3	3.4	7.6	0.77453
70	7	7--3	3.3	8.6	0.518822
70	7	7--3	3.1	7.7	0.679031
70	15	15--1	11.4	11.6	0.73035
70	15	15--1	10.1	11.3	0.699981
70	15	15--1	8.9	11.5	0.585189
70	15	15--1	8.6	11.2	0.612131
70	15	15--1	7.2	11	0.540947
70	15	15--1	7	10.5	0.604686
70	15	15--1	6.8	10.6	0.570941
70	15	15--1	6.6	10.5	0.570133
70	15	15--1	6.3	10.3	0.576539
70	15	15--1	6.3	10.1	0.611472
70	15	15--1	6.3	10.4	0.560068
70	15	15--1	6.2	9.9	0.638978
70	15	15--1	5.9	9.9	0.60806
70	15	15--1	5.9	10.5	0.509664
70	15	15--1	5.9	10.5	0.509664
70	15	15--1	5.6	10	0.56
70	15	15--1	5.6	10	0.56
70	15	15--1	5.4	10	0.54
70	15	15--1	4.9	9.3	0.609182
70	15	15--1	4.4	9.4	0.529748
70	15	15--2	11.6	12	0.671296
70	15	15--2	10.7	12.2	0.589256
70	15	15--2	10.5	11.8	0.639062
70	15	15--2	10.3	9.8	1.09436
70	15	15--2	10	12.1	0.564474
70	15	15--2	10	11.7	0.624371
70	15	15--2	9.3	11.6	0.595812
70	15	15--2	8.8	10.8	0.698572
70	15	15--2	8.7	10.6	0.730469
70	15	15--2	8.2	10.8	0.650942
70	15	15--2	7.5	10.5	0.647878
70	15	15--2	7.4	10.6	0.621318
70	15	15--2	7.4	10.6	0.621318
70	15	15--2	7.3	11.2	0.5196
70	15	15--2	7	11	0.52592
70	15	15--2	6.7	11.4	0.452231
70	15	15--2	6.6	9.7	0.723151
70	15	15--2	5.9	10	0.59
70	15	15--2	4.8	9.6	0.542535
70	15	15--2	4	9	0.548697
70	15	15--3	14.1	12.5	0.72192
70	15	15--3	11.7	12	0.677083
70	15	15--3	10.8	11.6	0.69191
70	15	15--3	10	11.6	0.640658
70	15	15--3	10	11.7	0.624371
70	15	15--3	10	12	0.578704
70	15	15--3	8.8	11	0.661157
70	15	15--3	8.6	10.9	0.664078
70	15	15--3	8.1	10.8	0.643004
70	15	15--3	7.7	10.8	0.611251
70	15	15--3	7.2	11	0.540947
70	15	15--3	7.1	10.5	0.613325
70	15	15--3	6.9	10.1	0.669707
70	15	15--3	6.8	10.9	0.525085
70	15	15--3	6.7	10.6	0.562545
70	15	15--3	6.5	10.5	0.561494
70	15	15--3	6.3	10.3	0.576539
70	15	15--3	6	10	0.6
70	15	15--3	5.9	10.4	0.524508
70	15	15--3	5.3	9.7	0.580712
76	7	7--1	4.4	8.8	0.645661
76	7	7--1	4.4	8.5	0.716467
76	7	7--1	4.1	8.4	0.691745
76	7	7--1	4.1	8.8	0.601639
76	7	7--1	4.1	8.7	0.622624
76	7	7--1	4	8.6	0.628875
76	7	7--1	4	8.4	0.674873
76	7	7--1	3.8	8.5	0.618767
76	7	7--1	3.7	8.5	0.602483
76	7	7--1	3.7	8.4	0.624258
76	7	7--1	3.7	8	0.722656
76	7	7--1	3.6	8.5	0.5862
76	7	7--1	3.6	8	0.703125
76	7	7--1	3.5	8	0.683594
76	7	7--1	3.4	7.9	0.689601
76	7	7--1	3.4	7.9	0.689601
76	7	7--1	3.4	8.4	0.573642
76	7	7--1	3.3	8.1	0.620953
76	7	7--1	3.1	8.1	0.58332
76	7	7--1	2.8	7.7	0.613318
76	7	7--2	5.4	9	0.740741
76	7	7--2	5.2	9	0.713306
76	7	7--2	5.2	9.3	0.646479
76	7	7--2	4.8	8.9	0.680881
76	7	7--2	4.8	9	0.658436
76	7	7--2	4.7	9.4	0.565867
76	7	7--2	4.6	8.3	0.804495
76	7	7--2	4.5	8.9	0.638326
76	7	7--2	4.4	9	0.603567
76	7	7--2	4.4	8.9	0.624141
76	7	7--2	4.3	8.5	0.700183
76	7	7--2	4.2	8.4	0.708617
76	7	7--2	4.1	8.8	0.601639
76	7	7--2	4.1	8.3	0.71705
76	7	7--2	4	8.9	0.567401
76	7	7--2	3.9	8.1	0.733854
76	7	7--2	3.8	8.4	0.641129
76	7	7--2	3.6	8.2	0.652921
76	7	7--2	3.6	8.5	0.5862
76	7	7--2	3.2	8	0.625
76	7	7--3	5.5	9.4	0.662185
76	7	7--3	5.2	9	0.713306
76	7	7--3	5.1	9.1	0.676778
76	7	7--3	4.9	8	0.957031
76	7	7--3	4.5	8.3	0.787006
76	7	7--3	4.5	8.5	0.73275
76	7	7--3	4.4	8.6	0.691763
76	7	7--3	4.3	8.4	0.725489
76	7	7--3	4.3	8.5	0.700183
76	7	7--3	4.3	8.5	0.700183
76	7	7--3	4.2	8.7	0.63781
76	7	7--3	4.2	8.8	0.616313
76	7	7--3	4.1	8.5	0.667617
76	7	7--3	4.1	8.3	0.71705
76	7	7--3	4	8.9	0.567401
76	7	7--3	4	8.8	0.586965
76	7	7--3	3.6	8.6	0.565988
76	7	7--3	3.4	8	0.664062
76	7	7--3	3.4	8.4	0.573642
76	7	7--3	3.3	8.5	0.53735
76	15	15--1	12.5	12	0.72338
76	15	15--1	10.1	11.5	0.664091
76	15	15--1	9.4	11.9	0.557811
76	15	15--1	8.6	11.5	0.565464
76	15	15--1	7.3	10.9	0.563694
76	15	15--1	7.3	11.4	0.492729
76	15	15--1	7	10.5	0.604686
76	15	15--1	7	11	0.52592
76	15	15--1	6.8	10.3	0.622296
76	15	15--1	6.8	10.4	0.604518
76	15	15--1	6.5	10.2	0.61251
76	15	15--1	6.4	10.5	0.552856
76	15	15--1	6.4	10.5	0.552856
76	15	15--1	6.3	10.6	0.52896
76	15	15--1	6	9.7	0.65741
76	15	15--1	5.9	10.3	0.539934
76	15	15--1	5.7	10	0.57
76	15	15--1	5.5	10	0.55
76	15	15--1	5	9.3	0.621615
76	15	15--1	4.7	9.5	0.548185
76	15	15--2	12.6	12.2	0.693891
76	15	15--2	11.8	12.2	0.649834
76	15	15--2	11.4	12.6	0.569893
76	15	15--2	10.8	12.1	0.609632
76	15	15--2	10.1	11.6	0.647064
76	15	15--2	10	12	0.578704
76	15	15--2	9.4	11.4	0.634473
76	15	15--2	8.9	11.2	0.633484
76	15	15--2	8.8	11.1	0.643448
76	15	15--2	8.2	10.7	0.669364
76	15	15--2	8.1	10.2	0.763281
76	15	15--2	8	12.5	0.4096
76	15	15--2	8	10.8	0.635066
76	15	15--2	7.7	9.1	1.0218
76	15	15--2	7.5	10.9	0.579138
76	15	15--2	7.3	11	0.54846
76	15	15--2	7.1	10	0.71
76	15	15--2	6.1	10.2	0.574817
76	15	15--2	5.5	10	0.55
76	15	15--2	4.1	9.3	0.509724
76	15	15--3	15	12.8	0.715256
76	15	15--3	11.9	12.3	0.639487
76	15	15--3	11.1	12	0.642361
76	15	15--3	11	11.9	0.652757
76	15	15--3	10.6	12.1	0.598342
76	15	15--3	10	11.9	0.593416
76	15	15--3	9.3	11.1	0.680008
76	15	15--3	9	11.2	0.640602
76	15	15--3	8.6	11	0.646131
76	15	15--3	8.2	11.2	0.58366
76	15	15--3	7.6	11	0.570999
76	15	15--3	7.1	11	0.533434
76	15	15--3	7	11	0.52592
76	15	15--3	6.9	10.5	0.596048
76	15	15--3	6.9	10.1	0.669707
76	15	15--3	6.9	10.5	0.596048
76	15	15--3	6.4	10.5	0.552856
76	15	15--3	6.1	10.2	0.574817
76	15	15--3	5.8	10.5	0.501026
76	15	15--3	5.4	9.6	0.610352
95	7	7--1	5.2	8.7	0.78967
95	7	7--1	5.1	9.2	0.654948
95	7	7--1	4.8	8.7	0.728926
95	7	7--1	4.7	9.4	0.565867
95	7	7--1	4.7	8.7	0.71374
95	7	7--1	4.6	8.4	0.776104
95	7	7--1	4.6	9	0.631001
95	7	7--1	4.6	9.1	0.610427
95	7	7--1	4.2	8.6	0.660319
95	7	7--1	4.1	7.8	0.863973
95	7	7--1	4.1	8.7	0.622624
95	7	7--1	4	7.6	0.911212
95	7	7--1	4	8.4	0.674873
95	7	7--1	3.9	8.6	0.613154
95	7	7--1	3.9	8.4	0.658001
95	7	7--1	3.9	8.6	0.613154
95	7	7--1	3.8	8.2	0.689195
95	7	7--1	3.7	8.5	0.602483
95	7	7--1	3.7	8.1	0.69622
95	7	7--1	3.7	8.4	0.624258
95	7	7--2	6.6	9.5	0.769792
95	7	7--2	6.5	9.5	0.758128
95	7	7--2	6.4	9.2	0.821895
95	7	7--2	5.6	9.9	0.577142
95	7	7--2	5.6	9.4	0.674224
95	7	7--2	5.5	9.4	0.662185
95	7	7--2	5.4	9.2	0.693474
95	7	7--2	5.3	9	0.727023
95	7	7--2	5.3	8.6	0.83326
95	7	7--2	5.2	9.1	0.690048
95	7	7--2	5	8.6	0.786094
95	7	7--2	5	9	0.685871
95	7	7--2	5	9.1	0.663507
95	7	7--2	5	8.5	0.814166
95	7	7--2	4.7	8.8	0.689684
95	7	7--2	4.6	8.7	0.698554
95	7	7--2	4.6	8.5	0.749033
95	7	7--2	4.5	8.6	0.707485
95	7	7--2	4.2	8.6	0.660319
95	7	7--2	3.8	8.4	0.641129
95	7	7--3	6.5	9.9	0.669897
95	7	7--3	6.3	9.3	0.783234
95	7	7--3	6.2	9.3	0.770802
95	7	7--3	5.9	9.2	0.757685
95	7	7--3	5.5	9.2	0.706316
95	7	7--3	5.4	8.8	0.792402
95	7	7--3	5.4	8.9	0.765991
95	7	7--3	5.3	9	0.727023
95	7	7--3	5.3	9	0.727023
95	7	7--3	5.2	8.9	0.737621
95	7	7--3	5.1	9.4	0.614026
95	7	7--3	5	9	0.685871
95	7	7--3	5	8.9	0.709251
95	7	7--3	4.9	8.9	0.695066
95	7	7--3	4.7	9.2	0.603579
95	7	7--3	4.7	8.8	0.689684
95	7	7--3	4.6	8.6	0.723207
95	7	7--3	4.6	8.7	0.698554
95	7	7--3	4.4	8.4	0.74236
95	7	7--3	3.8	9.2	0.488
95	15	15--1	12.2	12	0.706019
95	15	15--1	10.7	12.2	0.589256
95	15	15--1	10.7	12.3	0.575001
95	15	15--1	10.6	12.7	0.517481
95	15	15--1	8.9	10.7	0.726505
95	15	15--1	8.8	11.2	0.626367
95	15	15--1	8.7	11.3	0.602954
95	15	15--1	8.7	11.1	0.636137
95	15	15--1	8.4	10.7	0.68569
95	15	15--1	8.1	11.5	0.532588
95	15	15--1	8	10.9	0.617747
95	15	15--1	7.8	11.1	0.570329
95	15	15--1	7.7	10.5	0.665155
95	15	15--1	7.4	11.5	0.486562
95	15	15--1	7.1	10.3	0.649751
95	15	15--1	6.6	10	0.66
95	15	15--1	6.6	10.6	0.554149
95	15	15--1	6.6	10.3	0.603993
95	15	15--1	5.6	9.5	0.653156
95	15	15--1	5.5	10	0.55
95	15	15--2	14.4	13.5	0.585277
95	15	15--2	14	13	0.637233
95	15	15--2	13.4	13.2	0.582617
95	15	15--2	13	11.8	0.79122
95	15	15--2	12.9	12.8	0.61512
95	15	15--2	11.6	11.6	0.743163
95	15	15--2	10.7	12.6	0.534899
95	15	15--2	10.5	12.2	0.578242
95	15	15--2	10.5	11.5	0.690392
95	15	15--2	10.4	11.5	0.683817
95	15	15--2	10.2	12.4	0.534977
95	15	15--2	10	11.7	0.624371
95	15	15--2	9.6	11.8	0.584286
95	15	15--2	8.9	11.5	0.585189
95	15	15--2	8.6	10.7	0.702016
95	15	15--2	8.6	10.5	0.7429
95	15	15--2	8.2	11.3	0.568301
95	15	15--2	6.8	10.7	0.555083
95	15	15--2	6.6	10.5	0.570133
95	15	15--2	4.7	9.6	0.531232
95	15	15--3	19.2	14	0.699708
95	15	15--3	14	12.8	0.667572
95	15	15--3	13.7	13.1	0.609406
95	15	15--3	13.5	12.1	0.76204
95	15	15--3	13.1	12.6	0.654877
95	15	15--3	12.7	11.9	0.753638
95	15	15--3	11.6	12.4	0.608405
95	15	15--3	10.6	11.5	0.696967
95	15	15--3	10.3	11.5	0.677242
95	15	15--3	10.2	12	0.590278
95	15	15--3	9.1	11.8	0.553854
95	15	15--3	9	11.1	0.658072
95	15	15--3	8.9	11.5	0.585189
95	15	15--3	8.2	11.3	0.568301
95	15	15--3	8.1	11.1	0.592265
95	15	15--3	7.7	10.6	0.646507
95	15	15--3	7.6	10.6	0.638111
95	15	15--3	7.2	10.5	0.621963
95	15	15--3	6.6	10.6	0.554149
95	15	15--3	6.2	10.2	0.58424

## Sheet: Table S3
This data is the recorded real-time temperatures and preferred temperatures (staying still for the longest duration, at least > 4min). Measured at 2018.		Real-time temperature
Acclimation temperature (oC)	Preferred temperature (oC)	1 min	2 min	3 min	4 min	5 min	6 min	7 min	8 min	9 min	10 min	11 min	12 min	13 min	14 min	15 min	16 min	17 min	18 min	19 min	20 min	21 min	22 min	23 min	24 min	25 min	26 min	27 min	28 min	29 min	30 min
7	6	9	9	9	8	7	7	7	7	7	7	7	6	6	6	6	6	6	6	6	6	6	6	6	6	6	6	6	8	8	8
7	12.9	10	10.5	11	11	11	13	13.3	13.1	13.3	13	12.9	12.8	13	12.9	12.9	13	13	12.8	12.2	12	12.2	13	13.1	12.6	13.2	13	11	10.6	10.6	10.7
7	10	9	11	11.2	11.3	11.5	11	10	10	10	10.5	10	10	10	10	10	10	10.1	10	10	9.8	10	10	9.9	10	10	9.9	10	9.9	10	10
7	9.9	10	9	9.8	9.8	9.8	9.9	9.9	9.9	9.8	10	9.9	9.5	9.8	9.9	9.7	9.9	9.8	9.8	9.9	9.9	9.8	9.8	11	10	9.9	9.9	9.9	9.9	9.9	9.9
7	13	10	11	10	10	18	18	16	15	14.8	14	18	18	12	15	15	14	13	13.8	14	13	13.5	13	13.5	13	13	13	13	13	13	13
7	\ (stable peroid < 4min )	8	8	13	13	12	12	14	14	10.5	10.5	11	15	13	15	11	11	15	14	10	11	11	12.5	15.5	11	10	9	9	10.5	8	7.5
7	11	14	14	14	14	13.5	13	13.5	13.5	13.5	13	13	13	13	13	13	13	13	12	12	12	12	11	11	11	11	11	11	11	11	11
7	10	13	13	13	12	12.5	12	10	16	17	17	13	13	14	13	14	10	10	10	15	15	10	10	9	10	10	10	10	10	10	12
7	11	11	11.5	11.5	11	11	11	11	11	11	11	10	10	10	11	10.5	10	10	11	11	11	11	11	11	11	11	11	10.2	10	10	10
7	8	10	9	9	9	8.9	8.5	8.5	8.5	8.1	8.1	8	8	8	8	8	8	8	8	8	8	8	8	8	8	8	8	8	8	8.2	8
7	10	10.9	10.9	11	11	11	12	12	12	12	12	11.5	12	11	11	11	10.5	10	10	10	10	10	11	12.5	10	9	10	10	10	10	10
7	9	18	15	15	16	18	16	20	12	12	10	10	9.5	10	9	9	9	9	9	9	9	9	9	12	10	9.5	9.5	9.8	9.8	9.9	10
7	13	15	13	15	14	14	15	14	13	15	14	14	14	15	16	15.5	17	15	15	17		15.5	15	15	13	11	10	13	13	13	13
7	13	14	13	13	13	13	13	13	13	13.5	15	13	13	13	13	13	13	13	13	13	13	15	14	10.5	10.5	15	15	13.8	15	16	16
7	12	12	11	11	11	11	11	11	11	10.5	10.5	11.8	12	11.8	11.8	11.8	11.8	11.8	11.8	12	12	12	12	12	12	12	12	12	12	12	12
7	12.8	12	14	13	12.8	12	13	13	13	12.8	12.8	12.8	12.8	13	13	13.8	13.8	14	13.5	13.5	13.22	12	11	11.5	11	11	12	12	12	12	12
7	11.5	15	16	14	14	14	14	14	15	16	14	14	16	13.5	13.5	13	13	13	13	14	13	11	10.8	10.5	10.5	11.5	11.5	11.5	11.5	11.5	11.5
7	15.5	14.7	14.3	14.3	14.7	14.9	14.9	15.1	15.1	15.3	15.5	15.5	15.5	15.5	15.3	15.3	15.3	15.5	15.5	15.5	15.5	15.5	15.5	15.5	15.5	15.5	15.5	15	14.8	16	15
7	11	12	14	14	15	12		11.5	11.5	11	11	11	11	11	11	11	11	11	11	11	11	11	11.5	12	11.8	11.8		11.5	11	11	11
7	11	13	9	13	12	14	14	13	10	11	12	11.3	11.8	11	11	17	17	15	12	11.5	11	11	11	11	11	11	11.6	11	18	17	16
7	11	11	11	11	11	11	11	11	11	11	11	11	10	10	10	10	10	10	11	11	11	11	11	11	11	11	11	11	11	11	11
7	12.5	13	12.5	12	12	11.8	12	12.8	12.8	12.5	12.5	12.5	12.5	12.5	12.5	12	12	14	14	14	12	15	15	12.5	12	12	12.8	13	13	13.5	13.8
7	12	13.8	13	13	13.5	13.5	13.8	13.8	13.8	14	13	12.5	12	11.5	11	11	10.5	10.5	11	11	12	12	12	12	12	12.5	11	11	15	15	13
7	12.5	12	12.5	12.5	12.5	12.5	12.5	12	12	12	12.5	12.5	12	12.5	12.5	12.5	12.5	12.5	12.5	12.5	12.5	13	12.8	12.8	12.5	12.5	12.5	12.5	12.5	12.5	13
7	9	11.5	10.8	10.8	10.8	10.8	10.8	11.5	11.5	11.5	11.5	10.5	10.5	10	10	10	10	9.8	9.8	9.8	9.8	9.8	9.8	9	9	9	9	9	9	9	9
7	11	12	12	12	15.5	15	16	18.5	18.5	17	16	18	14	14	14	13.8	13.8	13.8	13.8	13.8	13	13	12.8	12	11	11	11	11	11	11	11
7	10.5	10	9.8	11	11	11	11	10.7	11	11	11	10.8	10.8	11.3	11.5	11.5	11.2	11.2	11.2	11	11	11.5	10	10	10	10.5	10.5	10.5	10.5	10.5	10.5
7	10.5	10	10	10	10	10	10	10	10	10	10	10	10.5	10.5	10.5	10.5	10.5	10.5	10.5	10.5	10.5	10.5	10.5	10.5	10.5	10.5	11.5	11	11	11	11
7	10	9.5	9.5	9.5	9.5	9.5	9.5	9.5	10	10	9.5	9.5	10	10	10	10	10	10	10	10	10	10	10	9.5	9.5	8.5	9.5	9.5	9.5	9.5	9.5
7	11	12	12	12	12	11	11	13	11	11	10	10	10	10	10.5	10.5	11	11	11	11	11	15	15	14	19.5	17.5	17.5	17.5	18	12	12
15	17	16	17	17	17	17	17	17	17	17	17	17	17	17	17	17	17	18	18	18	16	16	16	16	13	12.5	12	11	10.5	10.5	13
15	12	13	12	12	12	12	12	12	12	12	12	12	12	11.5	11.5	11.5	11.5	11.5	11.5	11.5	11.5	13	15	14	14	15	15	15	15	15	15
15	12.5	14	13	14	14	14	18	15	15	13	13	16	18	16	18	16	14	13	13.5	13	12.5	12.5	12.5	12	13	13	12.5	12.5	12.5	12.5	12.5
15	12.5	11	12.5	13	13	11	11	11	11	11	12	13	12	11	13	12.5	13	12.5	13	12.5	13	12.5	12.5	12.5	12.5	12.5	12.5	12.5	11	11	11
15	13	13	13	13	13	13	13	13	13	13	13	13	13	13	13	13	13	13	13	13	13	13	13	12.5	12.5	12	12.5	13.5	14	14	14
15	15	10	10	9.5	10	10	10	9.5	10	9	9	9	9	10	9.5	10	11	14	14	14	14	15	15	15	15	15	15	15	16	15.5	15.5
15	12	15	14	14	13	13	13	13	13	11.5	11	11.5	11.5	11	11	11	12	12	12	12	12	12	12	12	12	12	12	12	12	12	12
15	10.5	10	10	10	10	10	10	10	10	10	10	10	10	10	10	10.5	10.5	10.5	10.5	10.5	10.5	10.5	10.5	10.5	10.5	10.5	10.5	10.5	10.5	10.5	11
15	13	13.5	13.5	13.5	13.5	13	13	13	13	13	13	13	13	13	12	13	13	12.5	12	12	12	11	11	11.5	11	11	10.5	10.5	10.5	11	11
15	11.5	11.5	11.5	11.5	11.5	11.5	11.5	11.5	11.5	11.5	11.5	11.5	11.5	11.5	11.5	11.5	11.5	11.5	11.5	11.5	11.5	11.5	11.5	11.5	11.5	11.5	11.5	11.5	11.5	11.5	11.5
15	11	16.5	14	14	15	15	18	12	11	10	10	10	10	10	10	10.5	11	11	11	11	10.5	11	11	11	11	11	11	11	11	11	11
15	14	15	14	14	14	14	13	12.5	11	13	15	12	11.5	11.5	11	10	12	16	14	14	14	14	14	14	15	15	15	14.5	14	13.5	13
15	11	8	8	8	8	8	8	8	8	8	8.5	8.5	8.5	9	11	11	11	11	11	11	10.5	11	12.5	11	11	11	11	11	11	11	11
15	11	10.8	10.5	10.5	11	11	11	11	11	11	11.5	11.5	11.5	11.5	11	10	10	10.2	10.2	10.2	10.8	10.8	10.5	10.2	10.2	10	10	9	7.5	11	9
15	10	11	11	11.5	10	10	10	10	10	10	10	10	10	10	10	10	9.7	9.5	9.5	9.5	9	11	10	10	10	10	10	10	10	10	10
15	15	15	15	15	17	15	15	15	15	15	15	12	12	12	13	13.9	14.4	13	12.7	15.6	16	15.8	15.5	15.5	15	14	14	14	13.5	13.7	12
15	14.8	11	11	10.5	10.5	11	10.7	10.7	10.9	11	10.7	10.7	10.5	10.5	10	10.5	10.5	10.7	15	16	15	14.5	14.5	14.9	14.8	14.8	14.8	14.8	14.8	14.9	16
15	11	11	10.5	10.5	10.5	10.5	10.5	10.5	10.5	10.5	10.5	10.5	10.5	11	11	11	11	11	11	11	11	11	11	11	11	11	11	10.8	10.8	14	14
15	10.5	11	11	11	11	11	11	11	11	11	11	11	11	11	10.8	10.5	10.5	10.5	10.5	10.5	10.5	10.5	10.5	10.5	10.5	10.5	11	10.2	9.8	9.8	9.2
15	10	10	10	9	9	12	12.5	10	10	10	10	10	10	10	10	10	10	10	10	10	10	10	10	10	10	10	10	10	10	10.5	10
15	9.5	9.5	9.5	9.5	9.5	9.5	10	9	9	9.5	9.5	9.5	9.5	9.5	9	9	8.8	10.5	10	9.5	9.5	9.8	10	10	9	9	9	9	9.5	9	9
15	13	13	12.5	12.5	12.5	12	12	12	12	13.5	13.5	12.9	13	13	13	13	13	13	13	13	13	13	13	15	15	14.8	14	14	14	14	14
15	11.5	16.5	15	15	14.6	13.3	13	13	13	19	14	15	15	16	12.7	13	11.5	15	13	13	13	11	11.2	11.5	11.5	11.5	11.5	11.5	12	12.5	12.8
15	11	10	10	11.8	10	10.8	10.8	12	11.8	11.8	12	12	12	12.5	12.5	12.5	12.5	13	13	13	12	12	12	11.5	11	11	11	11	11	11	11
15	12.8	15	13.5	13.5	13	13	12.8	12.8	12.8	12.8	12.8	12.8	12.8	12.8	12.8	12.8	12.8	12.8	12.8	12.8	12.8	12.8	12.8	12.8	12.8	13	12.8	12.8	12.8	12.8	12.8
15	12.5	12.8	12.5	12.5	12.5	12.5	12.5	12.5	12.5	12.5	12	11.5	10.5	9.8	9.8	9	8.5	8.5	8.5	8.5	9	9	9	8	7.5	8	10.5	9.8	9.8	9.8	9.8
15	10	9.8	9.8	10	10.8	10.8	10.8	10.8	10.8	10.8	10.5	10	10	10	10	10	10	10	10	10	10	10	10	10.5	10.5	10.5	10.5	10.5	10.5	10.5	10.5
15	14	14.5	14.5	14	14	14	14	14	14	14	14	14	14	14	13	13	13	14	13	12.8	12.8	12.8	12	12	12	12.8	12.8	13	13	13	13
15	11.8	10	10	10	10	10	10	12	12	12	12	12.5	12	12	12	11.8	11.8	11.8	11.8	11.5	13	11.8	11.8	11.8	11.8	11.8	11.8	11.8	11.8	10	9.5
15	10.5	10.5	10.5	10.5	10.5	10.5	10.5	10.5	10.5	10.5	10.5	10.5	10.5	10.5	10.5	10.5	10.5	11	11	11	11	11	11	11	11	12	11.8	11.8	11.8	11.8	11.8

## Sheet: Table S4
The data is the oragan weights at the 80th of acclimation in 2018. These tissues were used for metabolomics and transcriptomics. Note: some values are missing, because the organs were destroied during dissection.
Num.	Acclimation temperature	Body weight (g)	Length (cm)	Gill (g)	Brain (g)	Heart (g)	Liver (g)
1	7	4.24	8.5				0.0748
2	7	3.74	8.4	0.017		0.0053	0.0617
3	7	4.53	8.5	0.0242	0.0273	0.0083	0.0726
4	7	4.69	8.6	0.0409	0.0164	0.0047	0.0823
5	7	3.81	8.3	0.0108	0.0224	0.003	0.0914
6	7	4.18	8.7	0.0324	0.0174	0.0096	0.0796
7	7	4.15	8.2	0.0126	0.0189	0.0082	0.1051
8	7	3.08	7.6	0.02166	0.0194	0.0052	0.0585
9	7	5.17	9	0.0205	0.0176	0.0058	0.1269
10	7	5.59	9.6		0.0239	0.0089	0.1082
11	7	4.89	9	0.0278	0.024	0.0075	0.0867
12	7	3.56	8	0.0231	0.0175	0.0043	0.0457
13	7	3.09	8	0.0185	0.0188	0.0072	0.0799
14	7	3.2	8.4	0.0123	0.0234	0.0063	0.0354
15	7	3.4	8.1	0.0241	0.0202	0.0041	0.0743
1	15	4.74	9.4	0.0238			0.0524
2	15	5.32	9.4	0.0304	0.0206	0.0072	0.0476
3	15	4.65	9	0.0286		0.0069	0.0909
4	15	4.77	9.1	0.0241	0.0168	0.0081	0.0834
5	15	6.24	10	0.0209	0.0244	0.0075	0.0549
6	15	3.65	8.2	0.0225	0.0176	0.005	0.0509
7	15	4.85	9.6	0.0228	0.0245	0.0102	0.1168
8	15	4.62	9	0.044	0.019	0.0105	0.0541
9	15	5.13	9.6	0.0273	0.03376	0.0082	0.1077
10	15	4.68	9.2	0.0297	0.0245	0.0086	0.0526
11	15	4.5	8.9	0.0138	0.0205	0.0098	0.1243
12	15	4.5	8.9	0.0208	0.0241	0.0083	0.082
13	15	4.14	9.5	0.0316	0.02637	0.0075	0.153
14	15	5.9	10.4	0.0329	0.0226	0.0045	0.0738
15	15	4.21	8.9	0.0227	0.0262	0.0088	0.0369

## Sheet: Table S5
Table S5 Statistics of Polymerase reads (Whole length transcriptome).
CellID	Polymerase_reads	Polymerase_base	Average_length	N50
r54169_20180725_020721	724206	19500892203	26927.3	63396
r54169_20180723_084820	717279	21153820588	29491.8	68356

## Sheet: Table S6
Table S2 Statistics of ORI (Whole length transcriptome).
Cell_ID	r54169_20180723_084820
ReadsNum	277744
BasesNum	624837398
MeanLen	2249.69
MaxLen	16826
GC	46.13
N50	2495
MeanPass	23.73

## Sheet: Table S7
Table S3 Statistics of transcripts (Whole length transcriptome).
Cell_ID	r54169_20180725_020721
Number of Consensus Isoforms	16426
Mean Length of Consensus Isoforms	2504.63
Number of High-quality Isoforms	16140
Mean Length of High-quality Isoforms	2500.58
Number of Low-quality Isoforms	281
Mean Length of Low-quality Isoforms	2459.43

## Sheet: Table S8
Transcripts_ID	NR annotation	Brain						Heart						Liver						Tail						Fore limb						Gill					Skin
Transcripts_ID		Cold-1	Cold-2	Cold-3	CK-1	CK-2	CK-3	Cold-1	Cold-2	Cold-3	CK-1	CK-2	CK-3	Cold-1	Cold-2	Cold-3	CK-1	CK-2	CK-3	Cold-1	Cold-2	Cold-3	CK-1	CK-2	CK-3	Cold-1	Cold-2	Cold-3	CK-1	CK-2	CK-3	Cold-1	Cold-2	Cold-3	CK-1	CK-2	Cold-1	Cold-2	Cold-3	CK-1	CK-2	CK-3
GiantSalamander_f393p60_397_transcript14743_g1	.	236.93	333.96	103.89	169.33	3128.72	197.31	62.24	10107.6	44.77	30.68	96.39	39.35	31.04	68.44	11.99	24.55	55.33	347.74	154251	262841	216979	55159.2	478783	72805.6	1637.89	5000.49	114.92	1516.86	6576.4	1437.87	118.27	8646.7	1375.52	8546.29	7460.3	208100	248195	84352.3	80022.8	92814.6	97874.1
GiantSalamander_f2p48_379_transcript30894_g1	hypothetical protein T12_14577, partial [Trichinella patagoniensis]	2324.18	2124.71	1839.7	3136.7	42041.8	2343.95	1450.9	5086.35	5747.38	1317.9	14031.8	2787.33	2140.05	2658.6	3340.27	23453.9	6037.79	7587.84	6183.77	5762.49	8413.65	4431.58	8962.8	5863.73	7320.51	1749.39	1201.58	1700.11	1477.48	1465.19	4288.01	1683.48	6406.6	33225.4	99448.7	4585.91	8824.03	5046.21	24192.7	11217.8	45376.9
GiantSalamander_f1877p60_640_transcript30153_g1	adult beta-globin [Hynobius retardatus]	17262.1	14537.3	14934.6	19393	29326.1	16091.8	75712.6	2390.97	13750.8	9644.01	18314.3	8136.74	7413.61	5807.4	4618.1	2157.15	24355.2	2520.27	10576.6	18769.6	7576.13	15872.5	15291.1	9655.76	9245.62	7620.76	6598.01	9049.28	15982.1	9184.73	41776.8	35207.9	42118.8	11582.7	20150.4	5840.75	9712.78	3903.52	8604.83	20074.3	9161.7
GiantSalamander_f225p60_658_transcript30021_g1	beta globin chain [Ambystoma mexicanum]	26618.8	21026.1	21123.5	24463.1	48867.4	19056.8	126474	4723.87	21488.8	10907	25043.2	8931.64	10732.1	7962.29	5342.74	3790.08	27896.2	3007.53	16886.6	31970.4	12373.5	21214	21273.5	14822.5	15225.2	12330.4	10331.1	10694.9	20573.6	11130.4	63226.7	52523.6	61365.3	11669.4	14042.2	10382	15587.7	6501.79	14710.9	31774.7	11280.1
GiantSalamander_f5p60_1628_transcript27660_g3	cytochrome c oxidase subunit III [Andrias davidianus]	27318	21626.4	26242.5	21514.6	32821.5	27199.6	61362.8	146283	161981	82340.8	117822	107564	22591.2	22578.2	27119.3	54998.2	30937.4	19321.5	23738.7	27069.4	19455.2	23271.1	42777.9	22600.7	28861.2	26977.8	27472.6	36860.6	39007.3	33582.4	30972.1	27288.3	36401.9	89086.7	46149.1	20418.6	26900.1	31171.8	16314.5	26138	24946.5
GiantSalamander_f3p60_2387_transcript23962_g3	cytochrome c oxidase subunit I [Andrias davidianus]	31680.9	25640.6	29482.4	22080.5	27331.6	24508.9	39184.7	114800	121970	53286.6	55815.3	73508.9	21529.8	23917.6	24607.3	60835.1	20355.2	23641.7	24845.1	30127.1	16314.9	21927.4	43614.2	23561	27137	26658.1	26924.5	28182.6	24651.7	28729.6	28452.7	25701.5	23732.6	86692.4	33675.1	22122.9	28043.8	24735.5	18116.6	18053.2	25058
GiantSalamander_f581p60_2289_transcript7052_g1	serum albumin precursor, partial [Plethodon vehiculum]	1.23	1.77	0.25	4.2	3.4	3.23	2.59	7.9	18.09	0.06	88.61	1.03	79350.1	77816.5	37180.5	38684.1	101859	85586.3	15.62	13.91	2.18	0.57	2.65	0	0	0	10.63	0.07	0.07	0	0	0	0	5.16	3.22	0	1.04	0	0	13.91	21.87
GiantSalamander_f14p60_240_transcript15136_g1	.	5214.88	3371.24	4571.88	6069.38	30724.1	8300.78	34003.8	6635.45	43767.6	5090.6	23552	12338	2138.68	1161.93	2720.47	13122.7	6016.46	1609.18	2342.35	6621.39	2598.91	5176.73	21724.8	5578.1	3895.08	2899.85	2428.82	4018.86	3068	3436.47	9126.69	11021.1	16495.8	20504.4	28621	2713.39	2902.85	1915.3	6992.54	18124.9	15685.2
GiantSalamander_f46p60_519_transcript14514_g1	PREDICTED: apolipoprotein C-I isoform X5 [Chrysemys picta bellii]	93.42	110.62	107.22	41.5	30.93	95.4	13.06	5.84	8.35	3.54	28.97	0.61	25353	25422.7	54189.5	89795.8	32043.7	32050.7	362.42	484.2	402.73	65.52	554.55	61.1	479.76	566.71	485.88	38.05	405.84	41.19	418.2	422.38	772.41	625.61	104.06	222.4	359.57	261.66	70.35	240.78	28.7
GiantSalamander_f5p60_1000_transcript29447_g1	minor alpha-globin chain, partial [Pleurodeles waltl]	10658.2	7775.81	8931.99	10763.1	21975.4	8862.31	50432	2116.96	11183.3	5255.5	12206.2	4892.49	4417.47	3151.31	3269.15	1834.39	15450.1	1537.71	6371.53	11937.2	4955.71	8689.1	9442	5749.69	6034.77	4577.41	4286.85	5154.3	9048.35	4982.15	24036.1	19072.6	28255.3	7056.29	11096	3610.08	5840.35	2629.58	5674.27	15005.7	5326.69
GiantSalamander_f89p60_400_transcript30808_g1	PREDICTED: protein S100-A1-like [Cyprinodon variegatus]	32.09	22.11	30.64	14.14	129.01	16.73	7.68	24.89	5.06	10.16	9.92	9.66	3.14	7.46	9.71	2.36	2.59	119.81	13574.4	21424.1	13509.4	4965.84	9207.65	14220.9	18316.8	18217.7	13057.9	6942.1	6993.52	12090	16594.2	17531.5	32011.2	25422.5	47995.4	16764.7	23668.4	26481.9	12199.4	14592.6	19601.8
GiantSalamander_f2p60_706_transcript14061_g1	.	7.51	4.39	13.81	11.05	84.23	11.09	2.78	10.21	8.48	7.06	38.72	2.01	3.68	8.19	1.2	1.77	7.61	9	13613.3	8857.86	27329.9	2038.79	16087.7	16918	21784.4	20860.7	36574.1	24454.4	22720.5	19390.1	171.24	98.31	1481.7	152.31	77.65	6561.66	2626.1	25799.8	30931.1	17152.4	13873.1
GiantSalamander_f2p60_2184_transcript8965_g1	Uncharacterized protein T4D_4496 [Trichinella pseudospiralis]	449.47	351.38	341.04	552.9	6451.2	428.01	278.07	985.86	1088.2	216.6	2219.99	501.86	380.32	420.45	598.86	4933	936.24	1302.87	1048.6	995.19	1556.72	801.47	1532.03	979.38	1200.79	295.69	240.04	271.36	201.43	254.17	740.89	327.92	1111.83	4852.05	16254.1	804.11	1482.46	872.48	3990.54	1803.74	8030.41
GiantSalamander_f63p60_462_transcript14637_g1	.	25.24	30.13	23.55	17.87	221.72	11.65	19	2288.84	2.86	4.4	4.4	2.85	7.97	7.61	9.13	3.79	8.51	26.04	21746.7	16799.6	41401.6	4987.27	33028	5997.85	244.57	374.99	15.89	244.83	375.96	124.56	8.21	551.16	183.59	811.3	636.84	22880.6	17324.4	17304	5982.56	3304.49	6404.12
GiantSalamander_f34p60_951_transcript13431_g1	myosin regulatory light chain 2, skeletal muscle isoform [Xenopus tropicalis]	71.67	12.12	19.37	25.28	303.03	8.34	272.17	6.9	4.06	26.42	28.39	8.52	11.65	3.56	3.46	27.96	6.02	758.58	1640	7.45	3579.03	29456.6	1337.54	10953.7	5797.68	6540.07	4735.85	7608.6	8691.37	10608.1	93.84	270.2	230.95	508.92	159.58	484.06	15.88	11.42	4.19	7.26	48
GiantSalamander_f3p60_501_transcript30652_g1	.	5.26	3.61	3.26	4.29	19.66	4.57	1.57	4.46	4.13	1.88	25.61	1.33	1.2	1.97	0.86	0	4.52	7.59	3846.52	1885.96	11789.3	132.59	7664.26	3770.03	6018.46	6604.93	12687.6	9896.36	7035.54	7493.91	9.23	6.65	344.07	9.65	3.14	86.76	13.54	6201.76	6462.62	4471.3	4235.17
GiantSalamander_f112p60_669_transcript14082_g1	hypothetical protein Y1Q_012053 [Alligator mississippiensis]	25.98	10.39	7.72	25.38	297.54	6.25	89.69	3.48	0.64	13.68	18.28	6.09	5.49	1.15	2.13	9.72	8.08	402.29	882.56	3.67	1588.65	32642.4	840.3	6796.67	2475.61	3732.81	2145.93	5980.16	6632.34	8656.72	46.94	135.75	160.61	312	62.54	260.88	10.59	6.52	3.72	6.44	44.52
GiantSalamander_f21p60_773_transcript13909_g1	.	31.54	19.93	36.99	21.52	180.18	32.47	73.94	17.94	11.94	17.06	39.45	11.82	7.01	9.27	7.85	1.93	5.77	19.34	13011.7	14548	14866.3	8076.34	27277.7	22947.1	17017.9	15720.2	21425.5	22587.6	23022.8	15277.8	2372.18	2904.9	4807.63	5173.52	7117.75	20341	18603.1	27051.1	27394.7	33109.6	33634.8
GiantSalamander_f2p60_1235_transcript12807_g1	cytochrome b [Andrias davidianus]	2906.83	2574.84	2983.66	3867.14	9681.91	5376.05	5902.45	20781.3	17506.5	13131.8	24270.9	16756.7	2501.51	2724.54	5916.45	26812.6	6157.89	5953.12	2066.97	3034.92	1703.22	3869.36	13041.1	6064.54	2477.28	2534.7	2051.39	5130.05	4772.27	5377.1	2358.3	2504.86	3311.8	21155.8	18656.5	2214.5	2535.61	2462.8	4451.84	6137.69	11406.3
GiantSalamander_f343p60_1379_transcript12134_g1	actin, alpha 1, skeletal muscle [Xenopus tropicalis]	21.88	13.85	15.19	25.87	191.86	11.28	119.59	49.82	12.56	49.78	22.59	29.75	2.41	1.26	1.84	13.93	5.23	208.52	880.37	3.87	1540.58	19126	1442.13	6293.54	4074.42	4470.82	3526.3	6051.2	9254.46	8406.58	79.74	231.51	205.26	725.69	210.87	541.88	7.24	5.75	3.02	4.66	49.85
GiantSalamander_f10p60_3288_transcript18711_g1	major alpha globin chain [Ambystoma mexicanum]	825.04	682.83	720.53	892.84	3636.87	814.31	3999.46	304.34	722.34	543.91	2004.37	451.45	332.27	254.09	197.94	155.3	2503.72	118.11	496.54	988.67	392.96	747.66	2014.14	647.97	455.93	375.05	323.25	953.21	1641.14	467.41	1928.18	1635.79	2120.12	1122.71	751.61	378.29	472.21	205.47	515.23	2554.18	590.6
GiantSalamander_f2p56_1748_transcript27202_g1	serum albumin precursor, partial [Plethodon vehiculum]	0.78	0	0.33	0	0	0	3.79	0	0	2.65	0	0	10.09	11.27	28022.4	25.7	51.47	1418.72	0	0.12	1.79	0.47	0	0	0	0.06	0	0	0.3	0.14	0	0	0.15	4.74	8.68	0.38	0.19	0.38	0	0	0.26
GiantSalamander_f3p24_2938_transcript20694_g1	NADH dehydrogenase subunit 4 [Andrias davidianus]	7977.99	6113.31	7207.35	6904.51	8696.14	7416.32	10184.9	20112.4	25727.4	16735.1	15756.5	20674.7	4700.69	4979.36	5233.8	16285.6	5439.08	5178.34	6066.86	6459.68	4241.6	6078.24	9217.57	5098.84	7256.46	6588.16	6891.04	9031.94	8895.18	8795.78	7285.06	6383.75	7187.49	21293.2	10897	4817.68	6273.06	6919.57	4013.02	5498.91	4705.12
GiantSalamander_f2p31_1545_transcript11767_g1	serum albumin precursor, partial [Plethodon wehrlei]	0	0	0	0	0	0	9.29	0	0	0	0.11	0.81	219.85	236.68	683.88	24487	444.36	626.96	0.22	0.17	0	2.51	0.25	0	0.04	0.1	0.11	0.35	0	0.08	0.06	0	0	0	8.7	0	2.1	0.11	0.29	0	0.06
GiantSalamander_f11p60_623_transcript30349_g1	.	2.2	2.25	0.64	1.5	53.27	4.28	0.16	0.31	1.17	0.76	25.76	1.35	2.8	0.68	0	0.49	0.8	2.53	48.66	76.06	85.36	170.62	6457.56	945.42	516.56	299.1	644.77	4444.77	4667.44	409.15	3.6	2.56	0.88	3.54	0.95	19.5	2.1	815.77	20532.9	21795.7	6363.52
GiantSalamander_f54p60_990_transcript29334_g1	PREDICTED: myosin light chain 1/3, skeletal muscle isoform isoform X1 [Xenopus tropicalis]	39.93	8	8.44	18.51	191.66	5.15	132.63	2.39	2.24	10.06	16.15	4.91	5.45	1.88	1.12	9.26	4.56	374.4	916.84	4.83	2043.64	17391.6	882.89	6000.2	4058.91	4650.9	3136.58	6298.98	6959.32	7931.55	54.27	146.05	178.14	407.24	135.36	239.36	8.16	6.39	2.75	3.67	33.86
GiantSalamander_f71p60_743_transcript30047_g1	PREDICTED: cystatin-A [Equus caballus]	10.08	9.7	12.71	5.55	41.25	6.37	3.06	9.58	4.41	3.41	6.68	4.51	1.71	3.28	2.95	1.2	2.59	3.8	10837.8	12073.4	22776.1	2603.89	5091.99	6704.49	10365.4	12268.1	12323.5	4932.52	3932.56	6791.94	9989.51	10795.9	22573.6	5072.4	9220.84	10700	13728.7	24899.9	5515.16	6332.2	11120.9
GiantSalamander_f52p60_1030_transcript13213_g1	.	22.82	4.33	3	2.95	10.13	2.95	1.68	5.46	2.52	0.85	0.56	0.92	1.6	1.45	0.34	0.42	2	4.98	14193.3	20053.7	551.79	2520.5	765.26	3742.26	12212.2	12626.1	4249.34	771.03	1190.78	4577.15	6882.69	8307.43	4114.06	1961.54	2876.16	11524.7	23586.1	1557.91	3542.91	7.45	3881.06
GiantSalamander_f2p19_777_transcript13859_g1	cytochrome c oxidase subunit II [Andrias davidianus]	129.43	32.54	58.59	520.41	7880.04	1148.3	7294.18	6739.62	3133.97	11710.1	283.6	14807.4	434.36	132.64	767.85	1437.44	8571.05	153.23	115.97	207.85	379.36	3158.56	3287.9	3064.9	531.29	473.92	157.92	7920.79	13223.7	5402.76	363.8	602.57	81.26	10611	5706.96	237.68	182.91	3268.53	4302.85	10121.6	2271.69
GiantSalamander_f270p60_569_transcript14276_g1	RecName: Full=Fatty acid-binding protein 2, liver; AltName: Full=Liver basic FABP; Short=LB-FABP; AltName: Full=Liver-type fatty acid-binding protein; Short=L-FABP	1.14	0.79	0	1.35	0.32	0.94	4.23	14.27	11.61	0.47	23.07	1.17	16028.5	18820.1	22296.3	9713.93	22843.4	16339.1	4.8	3.34	2.52	0.97	0.95	0.13	0.21	0.07	2.5	0.33	0.25	0.41	0	0	0	3.79	4.8	0	1.78	0.29	0	4.02	4.77
GiantSalamander_f3p50_3037_transcript20026_g1	cytochrome c oxidase subunit I [Andrias davidianus]	6053.64	4017.59	6655.17	4113.3	5386.57	5129.94	7203.87	18882.7	21918.5	8554.54	10552	11025.6	6451.01	6712.26	6109.58	5123.1	3077.12	4168.23	5459.73	5457.41	3881.59	3207.8	7475.29	3295.7	5184.76	5063.99	5719.39	5778.47	5168.3	5961.69	5867.32	4580.21	7170.56	18440.6	11466	3895.14	4749.74	5650.44	2476.64	3018.64	4373.87
GiantSalamander_f4p52_1677_transcript27451_g1	creatine kinase M-type [Pelodiscus sinensis]	7.02	4.86	4	9.47	81	3.17	4351.31	4677.85	4459.13	5347.76	6348.2	3314.65	1.48	0.75	0.81	13.9	2.98	153.61	362.02	2.95	711.4	8547.33	467.5	2218.22	1142.89	1583.17	1077.35	1833.34	3377.03	2906.77	14.25	49.18	39.59	151.85	36.24	100.23	2.88	3.38	1.01	3.45	14.27
GiantSalamander_f2p28_1598_transcript11712_g1	cytochrome c oxidase subunit II [Andrias davidianus]	74.32	37.77	61.92	119.59	3047.71	112.34	346.52	535.34	615.25	375.5	429.91	405.27	83.12	72.2	185.53	1941.9	119.57	46.18	32.82	46.81	57.7	68.47	203.19	104.56	43.46	48.79	40.87	130.71	148.18	106.98	56.39	86.16	93.04	477.53	10094.6	75.61	51.51	89.36	157.15	723.72	1095.39
GiantSalamander_f67p60_970_transcript29441_g1	troponin I type 2 (skeletal, fast) [Xenopus laevis]	39.02	6.47	7.84	12.16	145.42	3.22	131.61	1.84	1.85	10.93	14.54	4.01	5.2	1.61	1.81	16.26	2.58	355.25	863.18	4	1744.75	12772.3	564.44	4346	3138.59	3571.38	2732.96	3307.14	4267.34	5353.17	53.71	150.88	119.89	250.84	73.22	218.47	7.9	4.91	1.78	2.54	24.47
GiantSalamander_f13p60_586_transcript14304_g1	uncharacterized protein LOC100036820 [Xenopus laevis]	17.99	20.3	22.77	17.01	209.82	6.18	85.37	2.37	0.87	12.17	8.22	2.75	4.66	0.67	0.72	26.66	3.06	84.99	166.07	0.79	9.21	11765.4	305.37	324.39	2773.48	2719.44	1518.64	4079.85	4776.04	4723.99	11.24	31.89	34.92	92.21	18.59	146.31	3.81	1.83	2.68	2.47	28.45
GiantSalamander_f77p60_485_transcript14549_g1	.	3726.25	3668.41	3161.56	3153.39	5711.6	4150.65	13895.5	10844.4	9895.02	15884.9	15300.2	13575.1	3959.79	3435.87	5710.82	8272.78	7039.33	5261.12	6779.46	8686.54	7344.62	11070.5	14628.1	14979.1	7774.07	7457.3	6781.95	10371.8	11848.6	8991.41	5537	5036.93	9487.67	6931.41	9419.68	9121.19	7691.89	9608.75	12869	18758.6	15749.7
GiantSalamander_f3p60_2219_transcript25082_g3	NADH dehydrogenase subunit 1 [Andrias davidianus]	5341.75	4464.26	5711.15	5135.4	7545.84	5466.37	4109.84	8377.73	9727.81	8308.68	9177.52	9724.53	2577.56	2827.35	2980.46	7217.98	4803.98	3060.41	3174.85	3705.59	2626.65	3725.53	5616.79	2962.3	3886.82	3999.21	3692.9	5600.3	6100.4	5366.68	5077.92	5152.59	5614.7	14526.5	7069.73	2263.73	3662.14	3949.88	2027.11	3331.07	2556.41
GiantSalamander_f45p60_390_transcript14723_g1	PREDICTED: LOW QUALITY PROTEIN: 60S ribosomal protein L36a [Sorex araneus]	3972.47	4342.36	3567.51	3097.58	5478.64	4103.3	8881.4	10258.2	9928.42	10384.8	12267.8	8974.15	3852.64	3396.52	6443.78	18074.5	5795.47	4424.29	5522.64	6559.27	5782.8	7146.55	17032.9	12781.4	6613.44	6951.28	6625.1	8949.09	9790.59	6898.53	5530.95	5050.71	10310.8	10436.5	14928.4	8243.6	6176.39	8011	11222.9	15339.1	16400.5
GiantSalamander_f2p46_3341_transcript18651_g1	NADH dehydrogenase subunit 5 [Andrias davidianus]	2955.73	2885.63	3269.31	3384.15	3899.02	3677.36	3556.52	7898.56	8335.33	7309.29	8692.82	8932.37	2740.07	3037.89	2749.95	7993.64	3615.1	3481.24	2057.38	2188.28	1286.48	3053.37	4722.59	2376.86	2106.57	2215.93	2087.23	3498.64	3528.22	3903.2	2561.29	2453.27	2453.88	9675.09	3699.9	1594.72	2136.24	1815.67	1644.17	1885.71	1998.97
GiantSalamander_f46p60_1287_transcript28711_g1	fast skeletal troponin C beta [Xenopus laevis]	6.36	4.16	1.21	7.57	33.62	1.02	38.08	0.97	0.49	6.69	2.87	2.93	1.87	0.47	0.33	5.33	0.93	133.25	375.34	1.21	625.12	9248.07	259.97	1738.88	1295.9	1288.36	796.77	1739.48	2034.08	2555.71	13.84	33.1	27.76	69.72	24.16	91.77	3.09	1.72	0.8	0.98	11.21
GiantSalamander_f456p60_638_transcript14081_g1	peripheral myelin protein 2 [Xenopus laevis]	611.12	392.65	307.77	240.38	278.46	235.61	2134.11	1066.76	700.04	2120.37	1224.86	1956.45	12.35	7.43	15.15	11.86	11.19	14.03	4822.57	3433.64	2325.12	1957.38	6279.15	6485.2	7081.96	5215.1	6693.78	12241.4	12660	6664.95	879.93	859.45	1741.01	803.84	1219.88	5323.7	3415.81	5800.03	8156.83	17322.7	5848.32
GiantSalamander_f12p60_442_transcript14701_g1	.	2.18	5.07	3.28	4.84	145.96	3.76	3.79	229.04	0.49	1.57	2.87	0.46	2.47	2.36	0.11	1.13	5.03	24.84	2770.58	1339.36	879.64	3359.3	12437.8	595.74	64.96	147.85	1.71	93.47	278.01	55.52	5.08	45.11	5.5	313.08	98.14	16924.3	7251.06	1695.09	13372.6	7984.37	7773.71
GiantSalamander_f6p60_1181_transcript28997_g1	troponin T type 3 (skeletal, fast), partial [Scaphiopus couchii]	17.16	5.25	4.86	7.95	90.27	2.35	62.45	2.05	0.81	11.15	8.83	4.15	2.02	0.76	0.7	7.29	1.71	168.98	305.75	0.52	472.16	6307.47	550.25	1909.04	1123.67	1262.71	960.94	1487.45	1977.02	2117.69	11.73	31.98	36.85	171.96	54.51	101.09	3.91	2.29	1.54	2.04	19.33
GiantSalamander_f10p60_587_transcript30372_g1	PREDICTED: lymphocyte antigen 6E-like [Xenopus tropicalis]	0	1.16	0	0.1	1.1	0.97	1.22	1.09	0.2	1.85	0.81	2.16	0	0	0.6	0.2	0.06	0.11	0.42	0.46	0.06	2.49	13.72	59.22	40.72	1.08	0	166.84	5.85	21.72	11107.7	10068.8	6353.48	4700.63	12986.8	20.12	1.26	0	0.91	1.97	6.79
GiantSalamander_f2p60_790_transcript29939_g3	.	0.21	0.03	0.27	0.26	0	0.51	4.37	0.42	2.1	0.61	3.52	0.43	5374.13	4752.25	9966.21	12080.8	4377.55	5945.45	1.07	1.08	2	1.13	0.12	0.24	0	0	0.63	0.03	0.24	0.08	0	0.02	0	0.98	4.39	0	1.15	0.08	0.04	1.98	2.16
GiantSalamander_f27p60_449_transcript14673_g1	.	6.8	13.16	6.65	3.57	84.94	5.33	2.36	722.51	2.78	0.65	3.19	1.37	0.83	3.29	0.87	0.48	1.48	9.76	6651.65	11078.9	13830.4	1900.85	16078.8	2969.91	62.26	218.97	1.87	69.92	191.86	47.31	4.44	345.83	61.59	254.42	254.45	7605.17	10705.3	5458.8	2263.42	1785.81	3786.12
GiantSalamander_f2p60_561_transcript14387_g1	.	2.57	1.21	5.95	5.56	32.17	3.83	0.5	3.53	2.5	2.13	11.88	0.42	1.26	2.2	0.36	0.21	3.24	2.77	3947.19	4276.94	6359.12	1411.3	5139.6	5591.42	6419.48	8561.98	9429.57	12204.8	7381.34	6024.28	38.58	42.79	280.39	67.76	31.82	3105.38	1962.12	8219.17	14442.7	6863.01	5218.89
GiantSalamander_f16p60_2388_transcript24001_g1	NADH dehydrogenase subunit 5 [Andrias davidianus]	4407.86	3039.55	3591.02	3865.76	4240.11	3518.77	6451.38	11756.9	12933.6	9600.35	9973.81	12836.7	4342.35	4981.19	3818.64	5759.24	2744.82	4285.5	2725.67	2783.76	1789.31	3140.78	4354.93	2570.03	2707.79	2879.8	2451.07	3271.31	2845.78	3797.91	3027.17	2859.6	2338.36	10797.3	4554.1	1721.57	2650.4	2044.37	1810.42	1481.56	2414.41
GiantSalamander_f2p60_1223_transcript28874_g2	tropomyosin [Ambystoma mexicanum]	3.02	3	1.46	1.89	2.17	2.41	9543.7	4156.61	2409.14	14980.6	10010.5	11786.9	0.03	0.03	0.09	1.02	0	0.28	2.27	0.29	4.06	15.91	0.77	5.06	26.94	23.59	21.9	32.73	46.66	58.98	0.48	1.49	2.17	2.64	2.71	4.29	0	1.47	0.07	0.02	0.11
GiantSalamander_f11p60_2614_transcript22629_g1	serotransferrin-B precursor [Xenopus laevis]	60.98	81.64	183.7	116.98	1.17	89.24	0.58	0	1.35	0.19	1.03	0.28	14103.9	14950.2	2882.05	0.8	7422.17	12852.5	6.36	16.54	49.61	0.26	0.3	0.87	1	0.84	5.07	0.89	2.78	2.54	0.01	1.08	0.94	0	0	23.18	8.38	34.41	23.19	10.16	0.82
GiantSalamander_f2p60_451_transcript30823_g2	.	0	0	0.72	0	3216.55	0	682.84	4449.35	2920.9	581.09	2070.65	1252.65	1.6	0	2879.95	11058.2	530.28	1421.74	0.64	363.5	6.4	3.21	11293.9	2256.28	5.29	0.68	0	3.43	0	0	0	0.32	2109.14	10995.8	12994.2	1.76	0.81	185.05	1530.96	4992.19	14582.9
GiantSalamander_f105p60_536_transcript30483_g1	.	0.11	0.13	0.81	2.32	47.64	0.11	0	0.29	0.49	0.4	0	0	0.57	0.15	0	0	0.07	0.21	1.99	129.77	6.79	769.28	14176.9	6243.05	1039.14	115.58	136.84	8388.01	6979.61	163.23	1.75	0.21	0	5.28	0	0.3	0	1.48	5532.21	5770.12	1251.39
GiantSalamander_f16p60_1176_transcript12848_g1	myosin essential light chain fast [Rana pipiens]	29.42	3.77	6.63	8.78	108.89	3.03	110.87	2.35	0.97	5.83	6.52	2.46	4.1	2.45	1.22	1.92	2.13	347.69	709.95	2.37	1271.63	13691.4	293.64	3693.12	2197.24	2640.37	1782.29	2556.82	2985.23	4309.95	45.19	130.73	105.53	127.32	33.89	212.28	6.34	4.75	1.42	2.02	16
GiantSalamander_f15p60_516_transcript30628_g1	PREDICTED: 60S acidic ribosomal protein P1 isoform X1 [Jaculus jaculus]	3955.68	3595.04	3585.55	3652.25	4214.35	4182.28	6446.34	3617.69	3764.77	4886.07	5184.9	4085.09	1915.62	1701.47	3507.11	3348.81	1845.83	2935.18	5387.96	6259.84	4846.02	4007.16	9132.33	9163.64	4302.17	3594.5	3518.16	2348.68	2688.71	2829.76	4118.88	4283.55	4504.5	5242.02	5851.43	6038.88	5368.08	4925.03	7778.3	5912.47	13111.2
GiantSalamander_f9p60_441_transcript14708_g1	PREDICTED: beta-microseminoprotein-like [Xenopus tropicalis]	0.18	0	0.19	0.44	0.17	0	2.34	1.32	1.89	0.13	8.79	0.35	8574.21	7932.6	7505.12	4343.35	13071.4	9850.06	2.53	1.58	0.87	1.04	0.75	0	0	0	1.35	0	0	0	0	0	0	0.28	0.91	0.5	0.68	0.89	0	2.71	2.16
GiantSalamander_f5p43_2571_transcript22904_g1	hypothetical 18K protein - goldfish mitochondrion	6473.59	4984.82	5921.03	7046.44	12929.9	6577.9	2357.79	8414.56	9972.34	2492.77	4321.33	3283.85	665.37	787.63	1334.42	3521.98	749.9	688.16	761.25	1142.49	983.7	1032.4	2875.77	1156.78	1034.88	1069.85	1191.09	1179.78	1301.83	931.73	1309.97	1395.22	1901.85	5719.94	3756.43	700.35	1392.25	1264.82	1284.02	1743.76	2354.02
GiantSalamander_f53p60_692_transcript30056_g1	PREDICTED: galectin-1-like [Sarcophilus harrisii]	1.11	3.41	1.37	2.04	60.66	6.11	0	67.92	0.46	0.19	11.8	1.65	0.23	0.68	0	0	2.09	8.92	2228.13	1238.7	2090.48	1162.16	9993.65	1365.85	11.11	23.74	0.29	28.45	104.84	31.02	0.75	32.48	4.63	128.58	117.89	2624.98	2211.13	738.97	1846.97	1654.83	2203.45
GiantSalamander_f13p60_577_transcript14309_g1	PREDICTED: leukocyte cell-derived chemotaxin-2-like [Calypte anna]	20.85	4.38	23.13	4.35	9.28	25.01	58.29	9.09	41.8	10.45	36.03	64.01	5862.1	7112.94	12479.4	4752.87	9361.15	6159.52	630.4	1837.19	339.17	548.11	387.27	530.8	576.7	1026.57	260.94	129.98	160.71	350.93	1225.58	1841.96	1282.48	2154.01	1832.94	533.17	1591.09	176.75	640.29	46.37	552.72
GiantSalamander_f15p60_374_transcript30978_g1	60S ribosomal protein L37-like [Scleropages formosus]	2771.02	2833.02	2300.05	2462.92	3387.95	2878.35	6616.33	3158.13	3030.68	6264.6	5944.38	5527.32	2744.66	2538.83	3651.57	3297.95	4680.82	3037.26	4717.42	5354.06	4800.6	5947.1	6868.92	8653.94	5333.75	5177.28	4854.93	7313.31	8301.59	5723.21	4188.82	3938.11	6560.11	3745.75	6205.51	6257.38	5599.71	6416.59	9625.77	12424.4	8682.19
GiantSalamander_f6p60_1667_transcript11261_g1	hypothetical histidine-rich protein [Xenopus laevis]	0.32	0.27	0.13	0.68	0.17	0.35	2.23	0.67	1.21	0	7.13	0.18	8991.21	7284.54	10554.7	4387.12	8266.69	9346.9	0.93	1.36	0.79	0.15	0.36	0.15	0	0.07	0.9	0.04	0.08	0.08	0.06	0	0	1.64	3.75	0.01	0.66	0	0	2.09	1.64
GiantSalamander_f11p60_825_transcript13803_g1	unnamed protein product [Xenopus laevis]	0.48	0.22	0	0.61	0.18	0.15	1.59	0.58	1.84	0.25	7.58	0.32	6839.73	7111.86	12262.3	4166.17	8827.67	7746.33	1.41	1.06	1.05	0.76	0.19	0.2	0	0	0.74	0	0	0.13	0	0.07	0.07	2.08	2.22	0.09	0.85	0.07	0.2	1.58	1.48
GiantSalamander_f36p60_762_transcript13833_g1	peptidyl-prolyl cis-trans isomerase-like [Scleropages formosus]	5678.6	6150.2	5363.92	5343.05	6159.24	5718.57	6866.43	2105.56	1559.46	5879.21	4441.44	4681.05	2885.55	2492.05	3100.28	2724.6	3442.02	2671.5	7259.81	8603.06	6375.6	6223.31	6575.82	10484.4	7460.89	7153.49	7371.65	8654.62	9134.15	6986.09	5694.02	5357.75	7549.06	3997.05	6221.96	9758.8	8537.14	8887.15	11774	12068.7	9087.15
GiantSalamander_f7p60_1156_transcript29033_g1	tropomyosin 1 (alpha) [Xenopus laevis]	10.86	4.82	8.26	8.81	115.83	2.44	52.54	9.79	21.55	32.53	51.54	26.07	0.92	1.09	0.74	2.43	3.65	109.62	597.09	3.51	1707.69	10990.2	702.44	4481.3	2635.7	2823.03	2664.73	4741.75	5366.93	6005.56	44.23	101.98	103.06	221.55	65.08	159.02	8.43	10.51	2.32	1.62	12.53
GiantSalamander_f540p60_844_transcript13467_g1	ferritin L subunit [Andrias davidianus]	109.39	86.75	101.94	249.93	875.15	229.56	623.6	60.28	362.23	254.08	747.95	231.65	3045.06	3575.66	6172.55	6492.56	5331.69	6253.94	892.31	1203.82	401.38	867.41	2736.12	2523.07	955.4	660.94	906.07	1288.32	1175.63	949.57	797.45	789.42	1019.46	1328.44	1289.2	862.2	913.82	613.48	2991.52	2315.94	3149.36
GiantSalamander_f20p60_435_transcript30811_g1	PREDICTED: 60S ribosomal protein L35 [Latimeria chalumnae]	3845.59	3825.27	3475.81	3615.99	6234.57	4140.73	5559.01	3738.17	3661.09	6076.63	6892.42	5714.6	2551.07	2194.5	3846.41	6768.62	4400.45	3010.9	3504.25	4022.67	3558.63	5532.59	10603.6	8180.56	4148.67	4036.63	3879.97	6142.47	6623.3	4795.31	3007.34	3003.9	4996.8	5937.26	7768.65	4782.76	4106.15	4332.44	8346.28	10773.4	11208.6
GiantSalamander_f3p60_1226_transcript28866_g2	glyceraldehyde 3-phosphate dehydrogenase [Ranodon sibiricus]	2940.78	3433.27	3323.33	3476.63	1740.8	2899.98	4145.54	305	157.44	4844.9	2754.13	3026.24	1417.15	1549.56	1316.66	195.27	893.5	1938.34	1384.66	1143.3	1870.06	9579.17	295.75	3982.29	3213.5	3361.24	2856.13	3801.97	5008.95	5603.6	972.51	1089.76	976.72	154.36	111.22	1709.38	1209.37	1009.85	1603.91	739.79	412.86
GiantSalamander_f2p60_280_transcript31115_g1	.	1.23	9.92	7.6	1.59	50.44	1.18	2.29	1278.03	1.07	3.31	1.7	0.67	0.95	5.28	4.43	0	0.82	15.11	4708.99	4783.28	10688.8	1763.74	7318.5	1670.37	73.72	91	5.94	82.93	130.63	32.37	5.84	126.96	100.4	187.81	186.07	7430.28	3502.86	5665.15	2433.52	1081.48	2117.49
GiantSalamander_f42p60_480_transcript14563_g1	PREDICTED: 60S ribosomal protein L23 [Nipponia nippon]	2785.5	2752.13	2321.49	2698.23	4115.26	3127.72	5427.39	2964.42	2544.28	4858.72	4641.96	4378.75	2196.91	2118.79	2323.13	3671.67	3722.9	2446.35	3746.32	4185.9	3791.05	5312.91	5850.1	7079.43	4287.05	3968.86	3643.41	5998.85	6617.2	4813.93	3178.5	2907.9	4417.13	3125.09	5245.61	4199.62	4148.32	4625.18	7315.39	10567.9	7882.68
GiantSalamander_f3p37_1723_transcript10868_g1	creatine kinase M-type [Pelodiscus sinensis]	3.57	2.77	1.65	4.37	39.28	1.56	1925.78	1079.9	659.14	2406.91	2754.49	1429.58	0.52	0.24	0.41	1.69	1.14	70.6	166	1.12	307.67	3566.67	191.31	975.55	543.54	773.56	466.39	823.08	1479.57	1244.87	6.34	25.61	19.22	62.79	15.16	45.86	1.24	1.27	0.54	0.88	5.26
GiantSalamander_f2p22_1507_transcript27999_g1	PREDICTED: fetuin-B-like [Latimeria chalumnae]	0.19	0	0	0.17	0.09	0.09	0.54	0.21	1.31	0.39	3.02	0	2249.29	2010.41	2565.08	10416.1	2246.69	2346.64	0.09	0.31	0.56	0.76	0.14	0.01	0	0	0.33	0	0.06	0	0	0	0.06	0.29	0.61	0.03	0.65	0.06	0.06	0.41	0.23
GiantSalamander_f444p60_450_transcript30646_g1	PREDICTED: protein S100-G-like [Xenopus tropicalis]	147.34	155.21	152.16	159.88	224.36	136.81	350.24	199.08	150.08	284.97	392.83	248.21	119.03	87.06	162.07	142.76	90.67	80.87	6188.71	7704.44	6027.46	2096.7	4719.95	5128.27	6918.49	8286.15	6059.44	4522.31	4996.1	5320.88	4241.04	4291.01	7722.72	2988.39	4505.32	7965.94	8232.04	10258.9	4252.38	6534.01	6247.82
GiantSalamander_f2p60_714_transcript14097_g1	PREDICTED: galectin-1-like [Sarcophilus harrisii]	5.45	3.48	1.78	7.08	83.81	7.09	1.01	130.52	0.24	1.1	8.66	0.54	2.96	1.67	1.83	1.19	3.23	10.21	2518.22	2550.3	3109.38	1993.31	9753.36	1758.16	31.18	58.34	0.84	35.61	150.3	45.49	1.8	99.48	15.84	195.95	175.06	5271.34	4608.63	1902.32	3097.3	3844.4	2613
GiantSalamander_f13p56_638_transcript30265_g1	MGC82582 protein [Xenopus laevis]	124.05	4.75	13.36	15.46	126.29	2.23	163.74	1.34	0.78	3.75	7.89	1.09	9.63	2.87	0.61	5.35	1.19	354.9	464.37	1.05	485.83	9595.74	50.04	590.08	1521.06	2926.48	1294.38	2934.49	3134.63	2585.62	4.41	17.75	18.01	7.09	1.1	168.04	6.34	4.19	1.03	2.66	12.8
GiantSalamander_f13p60_2094_transcript9389_g1	PREDICTED: myosin regulatory light chain 2, atrial isoform [Chrysemys picta bellii]	1.68	1.59	0.46	0.39	0.05	1.94	9284.9	7273.25	4648.03	9063.42	9546.17	8014.87	0	0.12	0.05	0.24	0.05	0.82	0.03	0.53	0.01	0.08	0.05	0.41	0.01	0.68	0	0.34	0.99	1.18	0.02	0.04	0.89	0.06	1.7	0.8	0.02	0.73	0.01	0.06	0.02
GiantSalamander_f18p60_400_transcript30903_g1	PREDICTED: 60S ribosomal protein L39 [Pelodiscus sinensis]	2437.07	2573.91	2240.97	2404.86	3371.25	2844.95	4748.98	1820.4	1706.99	4357.17	3725.13	3872.14	1896.88	1599.01	2474.56	1245.19	3473.34	1990.78	3260.03	3870.05	3449.29	4148.96	5375.15	6635.56	3583.57	3533.16	3329.21	4985.05	6051.81	4076.12	2917.59	2776.41	4314.46	3090.15	4919.15	4389.95	4164.76	4675.64	6846.76	9513.23	6692.22
GiantSalamander_f171p60_1700_transcript26909_g1	hypothetical protein cypCar_00000665 [Cyprinus carpio]	4497.52	5000.05	4407.41	4381.18	4057.22	4462.43	6375.73	1872.44	1466.41	4476.49	3497.64	3256.45	2528.77	2540.3	2630.08	1657.54	2578.3	2751.33	6319.42	6783.6	5285.52	5973.55	5443.58	9508.31	4995.33	4701.57	4440.78	4000.7	4671.95	4516.59	5105.29	5110.98	4112.7	2541.61	3111.42	8160.58	5757.19	5282.61	8617.82	6190.33	7821.82
GiantSalamander_f2p60_835_transcript29816_g1	RecName: Full=Serotransferrin-A; Flags: Precursor	0	0	0	0	0	0	0	3.68	0.96	0.11	0	0	3.4	4.19	7.19	9250.56	1.13	3.89	0	0	0	0	0.88	0	0	0	0	0	0	0	0	0	0	0.41	1.33	0	0	0.11	0	0	24.34
GiantSalamander_f3p60_796_transcript29933_g1	ferritin heavy chain [Andrias davidianus]	1603.3	1338.46	2261.09	1908.53	3672.79	2128.96	1672.78	863.65	1729.17	1446.61	2019.12	1137.65	1724.65	1593.86	5109.59	6400.36	2430.35	2575.62	2407.64	2468.63	2273.42	1465.62	6041.75	4986.67	2179.88	1297.93	2339.21	1562.6	1519.15	1187.86	2262.97	1784.41	4334.87	4561.77	4409.04	3349.86	1583.23	2962.44	4392.05	3436.12	6140.4
GiantSalamander_f13p60_1799_transcript27098_g1	PREDICTED: fructose-bisphosphate aldolase A [Chrysemys picta bellii]	801.8	1080.29	1116.28	901.64	605.27	704.03	786.27	695.3	438.84	933.68	721.11	456.06	46.05	33.8	59.18	40.56	35.95	91.79	210.38	61.42	366.59	3094.78	151.98	689.49	1109.14	1212.27	787.65	1658.2	2155.49	1931.6	100.95	165.5	139.25	153.56	112.83	225.87	67.42	89.82	78.55	62.17	124.09
GiantSalamander_f34p60_1526_transcript11699_g1	PREDICTED: tubulin alpha-1D chain [Protobothrops mucrosquamatus]	74.48	72.93	63.25	60.12	82.93	69.26	1.91	2.27	2.16	1.41	1.3	1.84	1.04	1.07	3.55	1.2	0.2	6.42	3.81	3.71	4.5	3.57	10.12	21.27	24.66	2.08	1.62	46.92	2.94	11.34	8202.98	8848.65	3856.2	1009.57	2380.44	14.18	4.14	3.34	2.91	2.31	5.66
GiantSalamander_f11p60_6028_transcript70_g1	PREDICTED: myosin-4-like [Xenopus tropicalis]	0.35	0.71	0.21	0.62	4.6	0.15	2.04	0.23	0.01	0.21	0.13	0.43	0.07	0.1	0.02	0.36	0.11	1.61	503.38	0.89	846.76	8796.31	119.6	1972.96	457.69	448.43	617.83	650.58	532.47	658.15	24.81	50.96	46.24	40.51	21.52	39.4	1.8	0.32	0.05	0.44	1.85
GiantSalamander_f23p60_382_transcript30911_g1	PREDICTED: 60S ribosomal protein L37a [Apteryx australis mantelli]	3177.61	3297.12	2771.52	3222.02	4584.26	3383.07	4753.32	2283.31	2166.33	4526.48	4132.47	4334.65	2061.1	1908.31	2238.38	1615.9	3683.31	1958.87	3583.64	4130.7	3517.85	4970.44	5377.61	6286.03	4069.47	3904.36	3579.36	5765.25	6761.96	4492.47	3099.98	2762.42	4200.6	3114.25	4850.92	4204.83	4152.65	4225.46	6927.85	8718.4	6556.16
GiantSalamander_f2p41_1525_transcript27971_g1	.	0	0	0.94	0	31.02	1.1	0	0.4	0.44	0	5.55	0.21	0.55	0.34	0	0	0	0.49	0.35	647.36	0.12	0.77	5520.34	3768.49	0.31	1.22	0.99	2.84	1.52	1.19	0.05	0	23.79	115.43	104.02	0.45	71.09	7.52	2092.38	6224.27	8688.72
GiantSalamander_f17p60_503_transcript14559_g1	PREDICTED: 40S ribosomal protein S20 [Cuculus canorus]	2224.14	2209.04	1955.97	2047.91	2948.94	2062.43	4688.46	2459.64	1794.41	3979.81	3888.78	3658.3	2390.26	2117.43	2984.72	1737.68	3620.05	2192.63	3942.19	4795.08	4253.53	4328.55	4030.42	5635.26	4433.21	4153.55	3868.76	4709.61	5329.54	4089.85	3851.99	3876.32	5817.66	2589.88	4442.39	4691.95	4994.66	5744.94	6408.86	8566.78	5866.17
GiantSalamander_f2p60_1526_transcript28013_g2	glyceraldehyde 3-phosphate dehydrogenase [Ranodon sibiricus]	847.62	959.71	1004.64	1053.51	2721.02	1323.94	2211.38	4403.1	3361.66	4297.22	6115.23	3856.77	428.72	425.07	1423.57	3463.08	336.08	1002.16	420.9	482.97	628.77	2369.25	1718.11	2250.47	1061.46	1254.8	874.52	1347.63	1411.48	1798.33	260.45	327.29	611.21	984.51	837.97	605.17	407.32	413.73	893.11	600.02	2025.47
GiantSalamander_f23p60_508_transcript14489_g1	40S ribosomal protein S25 [Xenopus tropicalis]	2242.52	2352.11	2140.74	2071.51	3571.98	2448.95	3419.24	2836.36	2763.95	3326.73	3904.99	3156.17	1551.64	1466.36	2281.12	8016.36	2262.79	1803.39	2619.98	3118.37	2804.54	3351.94	6821.99	5620.24	3014.36	2863.91	2800.86	3809.65	4120.99	3260.76	2522.67	2285.84	3861.94	3466.3	4785.93	3628.62	2919.26	3484.23	4967.38	6080.29	8232.47
GiantSalamander_f205p60_893_transcript13386_g1	PREDICTED: glutathione S-transferase P-like [Lepisosteus oculatus]	4.24	4.58	4.41	2.84	5.14	11.11	1.96	4.46	2.51	2.34	8.03	0.54	3755.45	4132.3	4595.75	7586.4	2637.11	6594.49	732.12	1206.04	376.19	194.55	473.43	697.87	501.64	800.11	591	194.53	211.23	270.28	909.58	1427.22	1122.09	514.77	1022.97	777.1	875.62	771.24	802.08	231.91	951.32
GiantSalamander_f3p60_1981_transcript26204_g4	PREDICTED: uromodulin-like [Xenopus tropicalis]	11.97	4.7	2.92	4.74	11.16	3.81	1.11	2.89	1.38	1	0.48	0.95	0.66	1	0.46	0.57	1.16	2.17	5911.09	5262.42	730.3	775.84	1022.46	3631.58	6591.72	3808.91	1609.15	455.21	859.48	4140.69	3327.63	2199.94	1588.25	3086.69	4262.62	8026.6	5493.12	1059.37	1916.21	6.51	5983.9
GiantSalamander_f8p60_557_transcript14388_g1	PREDICTED: 60S ribosomal protein L21 [Sarcophilus harrisii]	2170.28	2154.91	1871.15	1827.5	2605.45	2191.51	3692.3	1766.47	1545.43	3619.2	3678.99	3211.29	1729.61	1607.83	2317.35	3080.64	2963.43	2009.23	2774.73	3161.87	2762.81	3817.65	5783.99	5743.55	2913.14	2879.22	2639.42	4210.83	4880.72	3513.99	2356.55	2234.89	3562.55	2798.52	4187.76	3693.93	3130.48	3534.98	6053.59	7952.31	7426.85
GiantSalamander_f3p31_722_transcript30051_g1	PREDICTED: natriuretic peptides A-like [Alligator mississippiensis]	6.78	8.84	5.77	5.63	5.41	4.32	5115.82	6289.95	3994.47	7852.75	6826.35	7165.94	0	0.04	0.07	0	0.04	0.38	0	0.39	0	0.04	0	0.33	0	0.49	0	0.21	0.66	0.55	0	0	0.73	0	0.31	0.33	0.04	0.92	0	0.3	0
GiantSalamander_f29p60_520_transcript30490_g1	PREDICTED: 60S ribosomal protein L32 [Tupaia chinensis]	2037.2	2123.73	1928.89	1791.54	2879.42	2334.46	4798.41	2929.13	2608.49	4968.15	4685.84	4379.98	1576.04	1452.22	2444.37	2809.35	1974.72	1964.64	3143	3923.59	3611.89	3669.22	5898.15	7166.73	3359.81	3256.2	3148.92	4020.35	4159.35	3663.12	2494.06	2488.65	4261.05	2840.69	4166.87	4837.94	3726.46	4184.48	6331.08	7037.97	7850.16
GiantSalamander_f22p60_1634_transcript11464_g1	fibrinogen gamma chain precursor [Xenopus laevis]	0.52	0.67	0.22	0.64	0.43	0.13	0.93	0.77	1.98	0.18	4.15	0.09	7178.15	7787.35	3190.83	218.02	4532.53	4539.12	1.05	1.25	2.07	0.2	0.73	0.12	0.09	0.19	1.38	0	0.38	0.14	0	0	0	0.31	0.27	2.48	1.33	0.67	2.11	2.18	1.85
GiantSalamander_f16p60_1810_transcript9997_g1	actin, alpha cardiac muscle 1 [Xenopus laevis]	29.02	2.67	4.17	6.33	62.99	1.73	93.11	0.8	0.77	2.85	5.84	1.46	3.94	1.33	0.56	3.43	1.31	301.64	577.65	1.56	861.62	7654.73	74.61	1934.55	764.38	950.87	774.72	589.94	907.02	1155.25	10.32	22.05	22.18	10.65	6.6	89.37	3.34	2.73	0.85	1.19	6.55
GiantSalamander_f3p27_1960_transcript9948_g1	serum albumin precursor, partial [Plethodon nettingi]	0.37	0.33	0	0	0	0	0.86	0	0	1.25	0	0	107.04	152.29	1390.07	4.97	255.64	253.19	0	0.25	1.93	0.6	0.4	0.92	0	0	0	0	0.56	0.15	0	0	0.19	0	2.33	0	1.56	0.13	0	0	0.47
GiantSalamander_f3p60_854_transcript29784_g1	lectin, galactose binding, soluble 3, isoform CRA_b [Mus musculus]	2.02	2.22	0.57	3.4	31.36	4.35	0.44	54.66	0.19	0.28	9.86	0.45	0.52	0.39	0.11	0	1.03	3.95	1090.15	880.06	909.61	777.03	4797.62	627.57	9.85	16.88	0.21	15.61	56.04	14.28	0.82	30.21	5.05	90.61	74.98	2287.05	1516.8	448.74	1101	1548.6	1054.01
GiantSalamander_f39p60_545_transcript14376_g1	p26olf [Rana catesbeiana]	303.13	316.1	275.93	406.88	335.21	236.43	1176.14	540.23	415.75	1153.42	1117.47	1032.21	362.44	238.71	419.23	769.95	446.31	382.86	3174.48	3403.48	3467.53	2643.9	3672.95	4598.09	3349.52	3251.11	2928.11	3525.38	4143.7	4213.33	4189.64	4139.74	5890.16	4586.78	7511.46	3538.42	3945.5	4559.04	4277.1	5828.06	4974.44
GiantSalamander_f179p60_1312_transcript28318_g1	PREDICTED: protein AMBP [Chrysemys picta bellii]	0.24	0.19	0.05	0.42	0.23	0.68	0.99	1.27	1.93	0.32	3.81	0.3	5073.47	4789.27	6808.42	4694.03	4919.24	7464.4	0.43	0.89	0.44	0.34	0.34	0.1	0.02	0.07	0.56	0	0.19	0.03	0	0.02	0.06	0.65	1.24	0	0.54	0.02	0	1.42	1.08
GiantSalamander_f30p60_532_transcript14427_g1	PREDICTED: 40S ribosomal protein S26-like [Rattus norvegicus]	1482.94	1427.42	1389.71	1430.31	2493.34	1888.34	2823.17	2683.48	2926.13	3139.77	3749.6	2706.65	1030.84	910.78	2038.47	6138.18	1347.9	1690	1967.38	2351.03	2182.41	2140.31	6029.42	5404.68	1852.52	1804.54	1704.45	2016.37	2258.84	1950.44	1511.66	1355.03	2354.65	3486.08	3819.98	2838.35	2014.62	2302.89	4570.8	4369.42	7452.95
GiantSalamander_f2p60_541_transcript14431_g2	PREDICTED: 40S ribosomal protein S24-like isoform X1 [Neolamprologus brichardi]	2412.08	2396.45	2233.76	2474.14	4173.16	2830.05	3624.94	1763.92	1592.16	3524.55	3732.25	3170.43	1309.1	1154.34	1612.76	2056.18	2270.23	1677.63	2294.34	2662.54	2417.33	3398.45	4211.27	5361.56	2670.5	2454.89	2416.4	3748.92	4041.04	3098.37	1957.77	1795.59	3005.92	1898.79	2849.74	3083.64	2506.01	2982.13	5469.56	7407.3	4656.48
GiantSalamander_f10p60_947_transcript29566_g1	.	8.63	3.56	6.25	2.08	11.1	3.94	0.91	4.02	1.38	0.99	0.71	1.06	0.58	1.42	0.19	0.09	0.49	1.66	4332.92	5807.32	5081.9	947.79	1108.89	2804.33	5434.12	5210.9	4311.82	1215.89	1366.67	2813.17	2192.16	2149.26	4498.86	1116.09	2305.53	3833.07	4803.61	7310.12	2026.98	1694.62	3089.98
GiantSalamander_f14p60_560_transcript14375_g2	PREDICTED: 60S ribosomal protein L27a [Lepisosteus oculatus]	1071.72	969.25	964.72	793.99	1762.1	1234.08	2432.01	1558.44	1922.35	2416.11	2897.5	2219.99	1238.91	1034.83	2107.46	2802.04	1694.67	1542.87	2173.56	2763.43	2244.19	2464.72	6572.18	5558.88	2531.66	2376.78	2328.58	3062.12	3240.46	2603.48	2250.58	1939.64	3753.1	3715.98	5056.54	3374.42	2466.97	3082.69	4934.69	5544.91	7302.51
GiantSalamander_f16p60_439_transcript14698_g1	60S acidic ribosomal protein P2 [Amazona aestiva]	1851.29	2041.1	1750.3	1595.2	2715.09	2095.09	4028.07	2990.59	3140.63	3988.01	4352.73	3569.37	1601.57	1469.64	2471.6	2803.56	1995.66	1786.65	2697.55	3367.11	3040.92	3285.53	6773.46	6344.27	3001.93	3041.85	2879.19	3733.25	4160.17	3290.19	2503.04	2481.14	4201.12	3278.65	4649.8	4308.57	3332.2	3911.41	5913.71	7114.01	7237.18
GiantSalamander_f16p60_695_transcript14035_g1	PREDICTED: 40S ribosomal protein S8 isoform X1 [Mandrillus leucophaeus]	2161.55	2109.34	1926.89	2299.85	3807.23	2507.78	4354.07	2149.74	2039.95	4180.46	4440.82	4102.68	1656.83	1520.8	2250.65	4720.42	2259.22	2056.65	3029.97	3439.15	2986.11	4275.76	6288.84	6231.43	3175.48	2922.61	2905.1	4052.1	3899.15	3726.38	2406.91	2218	3538.22	2961.1	3706.77	3249.63	3106.48	3614.41	5763.65	6466.91	7214.72
GiantSalamander_f3p60_944_transcript13457_g1	PREDICTED: myosin light chain 4 [Anolis carolinensis]	110.43	106.99	103.71	187.2	209.84	237.75	5125.6	3969.76	2603.25	6334.48	7202.27	5773.67	0.15	0.03	0.29	0.3	0.02	0.62	24.75	0.57	45.75	144.24	15.06	98.47	150.19	152.92	98.32	139.22	170.91	195.44	4.65	18.44	10.93	36.05	22.74	20.66	0.46	0.78	0.16	0.42	0.7
GiantSalamander_f2p25_1795_transcript10793_g1	PREDICTED: actin, cytoplasmic 1 [Camelus dromedarius]	2676.37	2746.21	2799.54	2698.09	2928.19	3035.8	1678.33	714.33	413.85	1114.45	892.58	859.36	1507.57	1128.43	1903.35	1660.76	1069.63	1384.27	4800.11	5486.26	7101.97	1948.81	2977.59	4361.19	3191.02	3830.12	3871.53	3110.44	2724.54	3520.28	2973.1	3251.01	4997.29	2211.06	3486.7	5287.98	5341.89	6047.1	4802.44	3900.95	4751.4
GiantSalamander_f17p60_454_transcript30795_g1	60S ribosomal protein L34, partial [Columba livia]	1801.38	1826.54	1611.61	1834.77	2894.47	2018.26	2859.14	1479.08	1343.92	2483.56	2396.66	2227.89	1376.58	1201.89	1545.69	2511.86	2316.99	1516.44	2292.41	2533.15	2137.04	3250.65	3902.57	5048.44	2464.01	2309.31	2148.54	3846.11	4289.08	3009.57	1940.5	1750.66	2749.02	1776.97	2459.9	3174.84	2631.48	2882.21	5435.36	7086.28	4171.85
GiantSalamander_f28p60_537_transcript30549_g1	ribosomal protein L27 [Alligator mississippiensis]	1733.83	1910.52	1634.13	1990.63	3171.97	2320.75	3201.07	2129.64	1797.13	3477.55	3595.67	3078.25	1263.69	1189.24	2180.88	5257.84	2438.16	1726.64	2316.85	2803.06	2619.19	3012.61	5843.23	5125.06	2567.19	2554.52	2473.79	4237.12	4418.66	3036.81	2146.3	2025.24	3572.78	3688.04	5633.77	3029.76	2727.96	3151.93	5247.88	6771.73	6976.67
GiantSalamander_f304p60_563_transcript14149_g1	PREDICTED: beta-microseminoprotein-like [Xenopus tropicalis]	0.19	0.23	0	0.57	0.37	0.29	1.13	0.66	1.25	0	4.07	0	4506.23	4454.02	6954.58	977.93	6887.71	4367.39	1.45	0.67	0.75	0.61	0.18	0	0.14	0	0.59	0	0	0	0	0	0.07	1.41	0.83	0	0.08	0.55	0	0.73	0.84
GiantSalamander_f2p19_1758_transcript11034_g1	thyroid hormone down-regulated protein (gene 17) precursor [Xenopus laevis]	3.53	3.93	2.9	5.21	0.3	1.66	0.48	1.54	0.79	0.32	0	0.17	0.12	0.21	0	0.35	0.24	0.88	1601.95	6632.62	500.5	1181.06	12.86	729.13	1693.36	3348.9	1274.06	145.86	3.42	1067.01	728.09	2245.47	1211.79	4.3	960.63	2290.2	6873.06	662.56	2579.25	0.25	1145.17
GiantSalamander_f2p60_606_transcript14266_g1	40S ribosomal protein S15 isoform 1 [Homo sapiens]	1394.84	1500.57	1345.31	1394.75	2658.74	1709.36	2510.56	2790.79	3046.25	2899.84	3375.07	2565.75	898.02	800.71	1657.04	1844.91	1623.07	1382.89	1699.29	2193.84	1855.06	2179.53	6117.84	5058.87	1766.44	1817.81	1712.58	2454.72	2637.66	2134.27	1468.7	1338.52	2558.31	2918.14	3617.24	2538.38	1869.03	2195.33	4255.26	5045.5	6775.13
GiantSalamander_f33p60_573_transcript14209_g1	PREDICTED: apolipoprotein C-II [Anolis carolinensis]	0.19	0.22	0	0.11	0	0.09	1.44	0.19	0.69	0.28	3.13	0	2614.81	2263.95	4396.1	6714.4	2587.33	3329.68	0.3	0.34	0.72	0.59	0.41	0.06	0	0	0.19	0.07	0	0	0	0	0	0.56	0.99	0	0.7	0	0	0.69	0.29
GiantSalamander_f4p60_1744_transcript11008_g1	PREDICTED: uromodulin-like [Xenopus tropicalis]	2.38	0.93	0	1.59	0	0.82	0.37	0.94	0.13	0.51	0	0.07	0.1	0.08	0	0.27	0.22	0.63	1791.74	4259.98	284.12	525.64	0.84	7.09	3160.1	4533.88	1835.56	158.79	134.05	1313.18	1814.01	3342.27	467.97	4.18	5.92	1285.73	6696.45	393.63	471.06	0	6.22
GiantSalamander_f3p60_463_transcript14620_g1	.	4.48	3.17	4.34	5.54	21.45	1.41	2.68	332.03	0.43	1.04	0.33	0.81	0.64	0.45	0.86	1.45	1.11	3.74	3173.39	2104.8	6677.14	1366.24	3035.35	498.51	56.73	58.95	6.61	60.3	67.15	21.06	1.66	74.29	36.04	67.5	61.08	4458.71	2238.12	2565.49	1327.08	416.86	730.3
GiantSalamander_f15p60_505_transcript14560_g1	60S ribosomal protein L14, partial [Ophiophagus hannah]	1664.57	1784.49	1513.59	1465.71	2071.08	1502.09	2895.03	1333.83	1254.2	3102.63	2989.38	2500.49	1363.62	1219.14	1782.8	4284.03	2400.42	1420.1	2426.79	2758.13	2486.54	3352.26	4627.79	4425.14	2882.63	2734.14	2692.5	4101.2	4569.7	2980.47	2462.41	2452.11	3845.77	2820.89	4022.37	3249.48	2903.28	3407.97	4990.27	6667.5	5225.73
GiantSalamander_f89p60_619_transcript30263_g1	PREDICTED: ovomucoid-like [Xenopus tropicalis]	0.64	0.19	1.01	1.03	4.13	1.89	0.38	0.76	1.15	1.19	6.75	0.37	0.41	0.38	0	0	0.86	7.32	621.63	219.96	208.86	188.82	1012.84	985.53	1470.72	1109.8	2836.98	3487.15	2853.22	1659.57	4.8	1.85	8.97	6.71	4.6	354.53	50.48	767.58	1961.27	2016.35	895.98
GiantSalamander_f23p60_587_transcript30389_g1	PREDICTED: 60S ribosomal protein L23a [Gekko japonicus]	2038.77	2097.81	1800.65	1932.28	3046.93	2088.05	3431.51	1945.78	1597.97	2876.08	2491.43	2490.53	1441.61	1250.55	1749.5	2428.25	2245.03	1924.72	2237.47	2579.65	2479.8	3232.25	4505.21	5876.71	2644.63	2607.97	2526.27	3669.67	3837.12	3149.38	2259.03	1994.04	3321.71	1947.15	2434.38	3504.64	2535.79	3017.84	5391.06	6551.71	4045.17
GiantSalamander_f64p60_1216_transcript28607_g1	folate receptor 4 (delta) homolog precursor [Xenopus laevis]	0.59	0.46	0.09	1.18	0.91	0.05	1.4	0.8	1.1	0.27	2.5	0.22	6385.71	6483.57	5777.92	1225.57	2653.04	4178.95	0.65	0.69	0.58	0.35	0.23	0.02	0.04	0.18	1.17	0.02	0.23	0.11	0.02	0	0.06	0.76	0.6	0.23	0.28	0.06	0	1.41	1.76
GiantSalamander_f7p60_469_transcript30751_g1	.	0.98	0.31	1.16	0.6	17.27	0.98	0.28	0.23	1.14	1	7.35	0.27	1.38	0.65	0	0	0.44	0.77	2551.26	815.91	4148.46	199.44	2137.38	2908.44	3783.19	1535.21	4196.17	2562.15	4770.74	3134.76	21.16	8.22	118.69	31.32	29.18	1386.69	403.45	3859.99	3440.24	3657.58	2573.39
GiantSalamander_f20p60_724_transcript13944_g1	PREDICTED: 40S ribosomal protein S27, partial [Lepisosteus oculatus]	2163.31	2083.15	1913.37	1809.82	3319.24	2126.52	4363.96	2494.44	2802.49	4085.97	4390.86	3296.97	1529.18	1408.97	2008.27	1782.82	3282.74	1951.86	2375.13	2841.54	2375.11	3915.11	4373.55	5336.71	2703.1	2708.21	2530.57	3679.39	3960.78	3055.13	2223.22	2008.23	3367.56	1922.95	2689.49	3152.7	2557.61	2956.93	4694.46	6203.28	4413.26
GiantSalamander_f2p30_240_transcript15106_g1	.	23.22	28.29	25.87	89.49	283.85	43.88	562.7	148.95	160.09	219.97	414.84	249.29	107.86	32.93	207.27	84.68	20.27	141.4	1232.24	1600.6	888.16	4380.66	2709.22	4096.42	1859.05	2275.88	1115.38	2194.24	1708.88	2020.56	322.05	500.71	692.44	1573.68	974.3	3788.52	3287.04	2907.49	6400.74	4786.13	5948.02
GiantSalamander_f4p60_447_transcript14667_g1	.	2.46	8.65	3.17	1.49	49.39	1.73	1.3	273.36	0.38	1.52	0.97	0.45	0.48	1.77	0.11	0.12	0.23	3.95	2411.98	3955.15	5140.79	611.33	6254.92	992.74	22.27	100.48	0.35	21.85	81.63	20.46	0.72	150.33	26.45	160.64	121.85	2889.28	4093.48	2389.19	674.19	721.28	1212.46
GiantSalamander_f3p59_912_transcript13517_g1	ferritin heavy chain B [Xenopus laevis]	1862.26	1377.84	2288.35	1720.19	2779.47	1699.65	1735.92	536.32	1196.31	1194.77	1488.21	982.27	1897.36	1663.14	5607.29	4752.57	2651.97	2747.04	2573.48	2137.3	2631.07	1255.07	4046.28	3642.83	2361.37	1181.03	2748.97	1669.27	1496.01	1164.56	2357.64	1634.26	4600.09	2901.83	2832.78	2979.46	1453.34	3121.95	3325.76	2708.9	3840.87
GiantSalamander_f19p60_373_transcript30961_g1	PREDICTED: 40S ribosomal protein S21 isoform X1 [Monodelphis domestica]	1506.02	1753.21	1468.09	1712.06	3123.69	2069.74	2267.37	1904.82	2224.88	2580.91	3216.5	2318.55	998.83	978.07	1707.15	3464.62	1845.82	1397.71	1652.33	2134.66	1826.52	2214.08	5195.42	4616.55	1948.09	1869.14	1748.32	2841.4	3271.32	2258.88	1550.12	1549.08	2653.26	3423.53	4734.89	2633.36	2043.87	2320.15	4513.79	5986.92	6204.07
GiantSalamander_f7p60_840_transcript13698_g1	PREDICTED: glutathione S-transferase P-like [Lepisosteus oculatus]	38.57	25.47	40.36	27.28	62.52	24.56	106.97	61.15	56.81	47.37	106.22	30.95	4224.41	3115.02	5613.9	5674.64	2768.32	4859.65	88.79	87.53	96.18	52.75	83.69	102.07	52.85	38.88	49.39	38.82	63.8	38.62	58.99	57.07	85.24	68.03	85.44	106.39	64.91	76.03	80.67	100.94	111.33
GiantSalamander_f128p60_756_transcript13765_g1	PREDICTED: secreted phosphoprotein 24 isoform X1 [Alligator mississippiensis]	0.6	0.53	0.17	0.32	1.47	0.22	1.26	0.8	0.45	0.21	2.91	0.41	5535.56	4827.1	6103.75	3158.46	3477.15	4034.21	1.06	1.21	0.82	0.37	2.79	0.92	0.36	0.5	0.93	0.38	0.32	0.36	1.13	0.93	1.8	5.36	5.95	0.39	0.39	0.64	0.79	1.39	3.49
GiantSalamander_f20p60_544_transcript14346_g1	PREDICTED: 40S ribosomal protein S19 [Latimeria chalumnae]	1424.63	1592.58	1390.03	1679.46	3287.43	1914.99	2785.8	2786.99	3641.28	3082.21	3746.09	2665.65	901.43	798.1	1478.54	2681.73	1227.74	1197.92	1762.87	2230.67	1987.55	2306.62	5826.14	5324.05	1764.44	1844.11	1709.31	2357.58	2553.42	2111.91	1484.26	1416.38	2529.18	2689.98	3131.59	2692.12	1827.46	2435.07	4340.03	5128.58	6096.01
GiantSalamander_f2p31_3170_transcript3230_g1	hypothetical protein [Callorhinchus milii]	295.38	279.44	355.43	314.04	1310.41	456.5	529.14	1224.69	988.71	353.63	1750.22	525.92	218.6	269.74	375.38	2081.97	274.98	364.89	1179.65	595.14	867.38	1139.1	2041.11	664.05	473.63	367.06	388.97	456.84	383.67	344.48	368.71	307.29	742.34	2139.52	4456.5	1191.1	2581.35	537.49	852.16	1027.43	2524.26
GiantSalamander_f3p60_484_transcript14572_g1	.	3.9	3.82	4.05	1.85	20.29	0.83	1.14	379.1	0.31	0.31	0.58	0.63	0.85	0.2	0.43	0.4	0.37	2.55	2469.13	1678.54	6059.42	397.89	2544.62	538.22	38.33	37.77	2.08	49.73	52.61	14.81	0.37	54.14	25.82	71.38	78.15	4063.36	1805.59	2324.84	411.83	300.58	727.4
GiantSalamander_f56p60_2019_transcript25854_g1	PREDICTED: keratin, type I cytoskeletal 12-like isoform X2 [Charadrius vociferus]	1.24	0.4	1.67	1.48	25.54	1.4	0.19	0.61	0.32	0.7	3.48	0.24	0.36	0.44	0.1	0.04	0.32	0.49	1797.58	891.9	357.74	1976.49	2275.79	3989.31	1294.54	687.06	690.88	1194.19	1222.94	1234.04	2.1	8.52	12.98	91.61	39.95	6050.67	3173.81	3136.5	4737.74	3851.53	4591.55
GiantSalamander_f26p60_730_transcript13870_g1	PREDICTED: 60S ribosomal protein L13 [Alligator sinensis]	1919.28	1875.37	1770.71	1701.55	2457.31	2103.14	3527.08	2011.52	1733.64	3408.52	2806.27	2925.1	1175.93	1059.58	1712.16	1671.41	1720.42	1549.94	2260.75	2689.18	2344.61	3135.39	4621.8	5848.9	2322.84	2142.53	2084.32	2957.64	2912.2	2810.71	1790.86	1617.28	2795.87	2103.11	2992.65	3113.46	2457.51	2827.66	4817.65	5156.38	6049.99
GiantSalamander_f65p60_511_transcript14445_g1	PREDICTED: protein S100-P [Alligator sinensis]	1.47	0.45	2.33	1.31	18.83	1.33	14.81	3.11	1.09	2.06	6.69	0.4	2.75	0.67	0.08	0	0.78	12	1400.33	1269.68	1516.61	945.85	2259.17	2397.17	2140.52	1663.73	2106.82	4095.13	4588.3	2344.06	187.36	222	419.69	262.04	282.85	1828.42	1480.31	2268.94	3822.58	6044.89	2600.71
GiantSalamander_f14p60_2971_transcript3701_g1	tropomyocin [Ambystoma mexicanum]	52.63	38.05	21.91	35.02	28.61	39.22	52.16	2.96	10.36	4.33	7.97	3.46	2.98	2.39	1.08	3.16	0.48	141.45	428.33	5.1	237.49	6004.36	63.81	598.93	1193.46	1394.9	533.35	686.72	619.84	1373.45	27.67	60.61	24.89	25.07	10.74	77.38	6.85	4.29	2.49	2.46	5.4
GiantSalamander_f13p60_2309_transcript8062_g1	serotransferrin-B precursor [Xenopus laevis]	0	0	0	0	46.72	0.1	4.53	0	0	0.36	4.2	0	2.3	1.84	5990.1	7.03	1.92	5.47	0	0.78	0	0.35	2.85	1.27	0	0	0	0.73	0	0.38	0.29	0	1.03	1.46	0.6	0.49	0	5.56	3.95	11.4	15.2
GiantSalamander_f25p60_465_transcript30738_g1	uncharacterized protein LOC569770 [Danio rerio]	96.75	100.52	65.7	29.22	165.11	38.03	2703.46	4632.98	2923.72	5978.96	5904.59	4143.18	506.05	474.3	1180.1	1926.34	302.42	735.27	654.24	773.71	578.83	780.39	1490.77	1321.75	882.42	919.68	765.32	648.61	690.83	771.46	1107.56	1049.11	1233.59	2185.26	3208.63	722.99	603.22	736.56	1184.55	512.92	1681.05
GiantSalamander_f10p60_2413_transcript23381_g1	golli protein J37.1 [Xenopus laevis]	442.88	1238.41	1904.63	1155.42	5958.73	203.43	0	0.53	0	0.29	0	0.16	0.03	0	0	0.33	0	0	5.59	1.45	6.63	140.91	5.3	3.71	12.62	11.38	8.36	15.01	12.34	5.04	0.19	0.44	0.58	3.85	0.28	2.25	2.09	2.44	0.84	2.44	1.45
GiantSalamander_f35p60_582_transcript30444_g1	PREDICTED: 40S ribosomal protein S14 [Takifugu rubripes]	1635.96	1595.73	1489.61	1446.45	2099.84	1634.27	2853.01	2113.75	2125.78	3090.93	3185.53	2608.98	1293.4	1082.75	2069.36	4411.12	1918.37	1398.67	2225.41	2584.71	2367.12	2602	4715.59	4141.25	2364.35	2122.34	2375.41	3126.28	3438.38	2442.76	2041.62	1829.39	3231.31	2562.52	3594.32	3248.14	2433.72	3165.18	4372.14	5890.84	5751.92
GiantSalamander_f49p60_426_transcript14582_g1	.	2.04	1.31	1.95	0.99	27.11	4.21	0.96	97.41	0.54	0	0.56	0.51	0.14	3.56	1.09	4.88	1.57	8.1	1395.38	1523.76	2961.71	623.65	5848.29	2041.28	11.05	22.01	1.1	16.74	27.88	22.32	1.18	31.36	11.53	120.58	144.93	1657.33	1563.49	1107.1	653.56	529.48	1649.25
GiantSalamander_f9p60_821_transcript13756_g1	heat shock protein family B (small) member 1 [Xenopus laevis]	13.56	6.95	16.21	4.68	5.7	19.68	3362.38	3404	2117.9	5269.88	5769.95	3479.81	0.71	0.1	2.27	0.8	0.03	4.27	48.31	0.74	138.36	220.8	92.14	251.11	249.84	192.75	183.35	159.35	194.6	198.95	6.35	19.25	16.58	46.33	18.15	27.02	0.47	0.71	2.46	1.47	2.32
GiantSalamander_f2p27_2333_transcript7925_g1	unnamed protein product [Homo sapiens]	2.14	0.91	1.53	2.3	24.33	3.95	33.68	10.74	3.18	1.47	7.08	1.94	0.63	0.94	0.49	0	0.75	0.88	746.06	1943.96	1257.84	640.61	3461.13	3291.2	455.89	573.72	518.62	1109.98	270	811.25	32.98	42.18	237.05	307.56	249.89	1122.42	1057.3	2113.28	3088.93	5196.49	5175.43
GiantSalamander_f2p21_1702_transcript11295_g1	PREDICTED: fetuin-B-like [Latimeria chalumnae]	0.16	0.3	0.03	0.34	0.26	0.17	0.46	0.23	0.63	0.09	3.52	0.06	5658.15	5085.55	5057.93	1397.02	3807.33	4152.3	0.43	0.52	0.21	0.13	0.11	0	0	0.01	0.55	0	0.03	0	0.01	0.03	0.03	0.77	0.93	0.02	0.28	0.07	0	0.86	1.15
GiantSalamander_f220p60_3019_transcript3794_g1	keratin 5, partial [Ambystoma mexicanum]	3.6	2.87	2.67	1.45	4.87	2.18	0.48	1.12	0.7	0.51	0.9	0.16	0.19	0.54	0.08	0	0.72	4.25	1929.67	303.53	2865.65	90.62	388.31	386.25	2256.61	3214.79	4316.88	2998.01	2246.34	3626.48	97.36	131.3	181.2	161.74	192.72	221.38	140.1	509	394.1	569.58	186.41
GiantSalamander_f2p23_1247_transcript28863_g1	PREDICTED: troponin T, cardiac muscle [Anolis carolinensis]	0.55	0.91	0.14	0.36	0.05	0.68	4139.93	3461.41	1529.92	5627.78	3409.27	4331.2	0.05	0.07	0.02	0.26	0	0.19	0.12	0.15	0.04	0.07	0.07	0.26	0.19	0.39	0.02	0.25	0.59	0.94	0.18	0.13	0.73	0.56	0.67	0.59	0	0.51	0.07	0.02	0
GiantSalamander_f30p60_1277_transcript12616_g1	PREDICTED: uncharacterized protein LOC101731692 isoform X1 [Xenopus tropicalis]	0.3	0.17	0.21	0.5	0.66	0.28	0.87	0.27	0.72	1.43	1.46	1.84	1904.81	1145.99	2051.54	4508.87	1295.73	3263.2	0.19	0.46	0.24	3.07	2.03	4.4	0	0	0.17	0.17	0.52	1.54	0.36	0.36	0.28	0.88	2.88	0.75	0.58	0.26	9.68	2.33	7.39
GiantSalamander_f3p60_2155_transcript25357_g3	Ovotransferrin, partial [Phoenicopterus ruber ruber]	4.13	0.44	3.67	0.02	62.03	13.25	4.1	0.73	1.33	1.73	8.89	3.21	344.64	322.4	5563.48	196.02	228.19	1290.63	0.73	4.31	2.01	2.22	4.04	1.35	1.19	0.34	0	0.12	0.23	0.06	0	0.1	2.23	1.21	0.81	4.32	2.03	16.15	9.5	16.63	20.42
GiantSalamander_f2p45_1498_transcript28050_g1	PREDICTED: protein S100-A1 [Protobothrops mucrosquamatus]	0.8	0.07	0.92	1.19	2.42	0.5	0.14	0.32	0.61	0.28	3.44	0.21	0.4	0.2	0.02	0	0.8	0.57	74.02	131.26	807.9	57.48	796.97	533.24	513.33	559.65	974.32	2837.39	2131.31	1065.77	0.23	0.35	7.15	0.89	0.14	0.82	0.14	261.52	2505.82	2355.27	662.99
GiantSalamander_f4p60_1781_transcript10889_g1	serum albumin precursor, partial [Plethodon vehiculum]	0	0	0	0	0	0.42	0.93	0	0	0	0	0	3.5	2.85	9.69	1074.18	4.76	12.44	0	0	0	0.02	0	0.33	0	0	0	0.01	0	0	0	0	0	0	0	0	0.73	0	0	0	0
GiantSalamander_f3p43_1783_transcript27049_g1	.	1.08	0	0	0.25	12.39	0	0.02	0	0.28	0.05	0.19	0.14	0	0	0	0.33	0.69	0.14	5.12	0.34	6.97	11.28	1907.65	5.53	5.66	0.24	10.39	85.13	4.13	0.87	0.34	0	5.36	37.93	0.73	3.37	0.98	73.8	325.08	1320.29	37.5
GiantSalamander_f54p60_490_transcript30618_g1	PREDICTED: 40S ribosomal protein S12 [Taeniopygia guttata]	1608.71	1896.3	1441.62	1502.29	1822.34	1713.62	3529.23	1413.63	1181.56	2664.77	2063.09	2221.25	1613.61	1793.27	1281.13	732.36	2484.17	1370.45	2598.45	3034.41	2770.44	3921.25	2594.46	4302.39	2898.45	3067.84	2707.72	4430.33	5344.27	3660.9	2352.58	2238.18	2954.56	1011.86	1452.81	4175.1	3411.14	3531.61	5072.99	4859.62	3360.07
GiantSalamander_f3p60_2133_transcript9186_g1	fibrinogen beta chain precursor [Xenopus laevis]	0.24	0.21	0.04	0.29	0.13	0.11	1.07	0.54	0.81	0.19	2.63	0.02	5317.04	2534.44	3564.83	3402.46	3031.01	2742.91	0.43	0.41	0.25	0.12	0.19	0.05	0	0	0.33	0.04	0.03	0	0.05	0	0	0.44	0.85	0.02	0.23	0.03	0	0.9	0.74
GiantSalamander_f26p60_883_transcript29711_g1	PREDICTED: 40S ribosomal protein S3-like [Neolamprologus brichardi]	1491.18	1587.85	1372.54	1307.38	2231.62	1632.09	2729.31	1754.9	2023.06	2589.75	2705.08	2175.37	1056.34	940.35	1637.78	1618.55	1276.99	1323.27	2193.64	2757.18	2242.41	2401.55	4492.67	5300.7	2071.23	2173.3	2013.71	2347.22	2427.01	2271.49	1800	1688.74	2694.33	2301.81	2728.02	3340.05	2419.66	2847.02	4478.64	4411.81	4994.02
GiantSalamander_f19p60_966_transcript29518_g1	PREDICTED: avidin-like [Parus major]	6.71	4.47	5.42	3.63	3.55	3.16	79.21	40.88	13.92	152.97	88.14	169.22	4111.83	2917.67	4189.88	610.48	5250.25	3344.72	4.45	4.65	20.06	5.24	3.32	3.45	29.38	21.91	28	24.8	35.17	28.13	1.2	1.86	6.31	4.47	3.79	2.34	2.59	12.15	1.71	12.28	3.12
GiantSalamander_f25p60_841_transcript13651_g1	PREDICTED: 60S ribosomal protein L6 [Chelonia mydas]	1884.64	1947.15	1740.52	1873.66	2802.33	2089.2	3055.64	1621.6	1325.48	3112.26	2952.31	2788.86	1524.57	1392.6	2259.54	3583.19	2082.4	1805.86	2263.38	2671.32	2442.32	2809.1	4488.12	4703.74	2465.63	2407.29	2444.15	3192.9	3370.08	2870.5	2084.86	1931.75	3071.01	2384.86	3341.61	2943.84	2514.26	2940.79	4469.31	4863.8	5249.96
GiantSalamander_f25p60_551_transcript30506_g1	PREDICTED: 40S ribosomal protein S11 [Camelus dromedarius]	1217.39	1348.4	1225.88	1205.19	1987.83	1544.21	2054.28	1541.67	1517.57	2368.37	2451.83	1928.25	909.86	817.13	1532.63	2302.06	1026.75	1280.71	1757.76	2242.95	1964.86	1787.31	4277.6	4337.43	1715.32	1761.97	1611.74	1856.63	2030.88	1883.34	1561.78	1506.9	2513.14	2489.82	2996.5	2878.45	2040.15	2304.21	3604.23	3052.51	5233.84
GiantSalamander_f11p60_1076_transcript13058_g1	uncharacterized protein LOC446289 [Xenopus laevis]	1057.77	1116.21	1031.82	1063.02	1841.72	1335.34	1692.6	1300.92	1273.5	1673.29	1931.99	1372.72	654.06	592.68	1258.67	1714.64	860.92	1115.86	1467.7	1839.37	1576.08	1259.53	4378.56	3938.68	1213	1172.73	1100.85	1014.22	1149.77	1058.16	1132.88	1161.57	1486.22	2077.09	2296.52	2358.87	1353.05	1602.61	2752.44	2463.72	5233.08
GiantSalamander_f8p60_429_transcript30821_g1	PREDICTED: 60S ribosomal protein L35a [Acinonyx jubatus]	1614.95	2192.07	1607.38	1458.62	2218.82	2223.53	2333.39	1109.95	1258.57	2193.62	1854.17	2250.68	1001.81	1104.94	1194.02	1977.37	1204.3	1322.98	1678.53	2416.18	1819.88	2152.76	3285.28	5168.36	1891.11	2246.44	1807.84	2270.48	2475.15	2526.09	1550.89	1849.57	2420.72	1408.17	2453.17	2669.36	2384.3	2278.39	3458.39	3500	4405.82
GiantSalamander_f13p60_547_transcript30609_g1	PREDICTED: 60S ribosomal protein L28 [Gekko japonicus]	1139.26	1207.49	996.21	1084.39	1741.03	1418.46	2431.84	2022.86	2054.29	3110.68	3289.53	2551.18	917.03	801.44	1623.62	4092.35	1319.27	1198.51	1564.72	1876.78	1758.05	2126.97	4633.86	4438.94	1681.11	1645.65	1614.25	2400.51	2584.94	1962.56	1436.98	1392.8	2566.99	2686.69	3578.02	2663.22	1763.07	2143.85	3930.82	4641.58	5167.47
GiantSalamander_f37p60_1014_transcript13251_g1	RNA-binding protein AxRNBP [Ambystoma mexicanum]	3882.5	3678.99	4187.54	3142.04	3641.26	3603.15	2444	1441.15	1058.15	2343.58	1896.89	1866.89	935.77	800.44	1684.22	1797.75	915.55	850.23	3228.57	3292.1	4604.98	1500.89	2081.58	2584.07	2813.96	2900.79	3408.38	2769.59	2417.99	2691.43	2999.62	3060.57	5166.32	2246.33	3570.21	3190.53	3001.89	4503.88	3037.73	3618.04	3022.82
GiantSalamander_f35p60_519_transcript14446_g1	PREDICTED: 60S ribosomal protein L26 isoform X1 [Aotus nancymaae]	1298.55	1507.52	1213.51	1293.95	1950.32	1505.75	2684.8	1442.58	1157.67	3161.64	2902.53	2661.44	1053.06	965.66	1469.23	1890.25	2078.62	1271.56	1633.47	1959.81	1624.41	2694.64	3865.64	4097.62	1824.62	1909.1	1788.07	3020.1	3654.09	2445.18	1583.44	1497.13	2381.49	2074.12	3107.95	2563.54	1911.97	1998.58	3941.26	5115.69	4490.42
GiantSalamander_f61p60_530_transcript14366_g1	PREDICTED: 40S ribosomal protein S18 [Thamnophis sirtalis]	1282.66	1290.52	1177.65	1251.14	1946.61	1615.34	2392.67	1310.93	1646.08	2020.52	1634.72	1757.87	871.19	870.95	1202.82	888.97	941.54	1049.68	1851.25	2415.14	2410.92	1864.09	3506.23	4520.35	1891.07	1747.56	1643.87	1887.44	2012.09	1990.15	1467.92	1368.83	2148.45	1443.67	1961.25	2763.91	1960.29	2389.67	3915.31	3826.04	5115.23
GiantSalamander_f2p55_1943_transcript10047_g1	.	0	0.51	1.19	1.54	10.16	0.88	0.33	0.1	0.41	0.04	5.05	0	0.09	0.14	0.05	0	0.26	0.17	5.16	0.13	13.81	71.33	2054.66	0.14	6.03	0.13	2.4	792.68	1.67	0.13	0.83	0.37	15.2	42.57	3.53	338.15	0.11	1017.38	5081.54	4079.99	324.49
GiantSalamander_f4p60_1238_transcript12684_g1	cardiac troponin I [Rhinella marina]	0.39	0.45	0.22	0.15	0	0.71	2842.97	2566.76	1619.64	4843.42	5047.95	3767.54	0.18	0.05	0.07	0.25	0.02	0.14	0	0.21	0	0	0	0.32	0.02	0.04	0	0.11	0.34	0.35	0.04	0.15	0.14	0.63	0.94	0.3	0	0.17	0	0.07	0
GiantSalamander_f2p52_2304_transcript24551_g1	fibrinogen alpha chain precursor [Xenopus laevis]	0.2	0	0.03	0	0.25	0.06	1.84	0.8	0.43	0.12	1.77	0.16	948.61	674.04	5045.21	4226.34	1324.54	3346.06	0.11	0.48	0.39	0.17	0.08	0	0	0.02	0.19	0.01	0.08	0.01	0	0.01	0.02	0.25	1.56	0.03	0.31	0.04	0.04	0.33	0.33
GiantSalamander_f2p60_1067_transcript13149_g2	PREDICTED: translationally-controlled tumor protein [Bubalus bubalis]	1323.08	1287.04	1185.86	1215.11	1943.29	1421.05	2369.33	1276.92	959.37	2304.76	2400.93	2093.91	946.11	869.85	1395.6	1858.18	1345.3	1158.55	2268.46	2628.91	2421.99	2342.33	3419.75	4103.22	2278.77	2109.03	2116.9	2287.28	2297.68	2212.98	1801.19	1720.16	2429.71	1975.16	2975.86	2935.15	2449.35	2785.76	3877.83	3944.93	5043.69
GiantSalamander_f68p60_768_transcript29833_g1	PREDICTED: 60S ribosomal protein L13a [Alligator sinensis]	1301.42	1286.27	1207.54	1165.63	1751.86	1358.77	2804.78	1106.64	988.83	2682.64	2392.92	2215.59	1053.31	898.79	1643.81	1378.53	1684.66	1293.35	1998.85	2427.86	1993.62	2532.72	3574.59	4536.51	2013.87	1909.54	1908.71	2782.44	3037.49	2395.02	1751.75	1633.12	2762.66	1990.86	3100.44	2989.67	2277.78	2588.43	4368.73	5029.06	4771.14
GiantSalamander_f78p60_1087_transcript29118_g1	ribosomal protein, large, P0 [Xenopus laevis]	2365.64	2374.78	2093.48	2231.42	2940.66	2609.1	3769.2	1312.07	1081.44	2854.69	2412.95	2414.39	1506.69	1404.53	1535.47	1019.18	1752.57	1447.82	3008.69	3510.62	2892.56	3278.05	2862.45	4964.49	2843.38	2640.29	2463.43	3020.4	3141.23	3002.77	2589.81	2498.07	2854.88	1519.81	2155.34	3623.87	3269.68	3344	4577.33	4548.61	3927.11
GiantSalamander_f5p60_1072_transcript29234_g1	caveolin-3 [Xenopus laevis]	0.1	0.26	0.3	0.11	0.68	0.64	0.45	0.27	0.1	0.24	0.21	0.67	0	0	0.2	0.07	0.02	0.15	0.1	0.07	0.02	0.29	3.83	23.74	15.57	0.33	0.07	33.61	1.35	8.07	4228.02	4299.81	1870.78	2089.6	4918.32	6.7	0.31	0	0.6	0.56	2.27
GiantSalamander_f47p60_1238_transcript12793_g1	hCG2040565, partial [Homo sapiens]	1437.85	1508.28	1215.99	1565.73	1182.31	1886.65	1792.59	349.62	401.38	2017.97	1492.53	2194.77	673.92	639.38	688.28	579.62	924.49	864.95	3159.83	2887.26	3948.2	1736.48	2325.61	3106.81	2479.05	2668.52	3019.08	4411.74	3597.74	3592.78	2465.28	2760	4695.96	1739.56	3027.68	2672.96	2911.08	4598.79	3708.32	4896.03	2977.68
GiantSalamander_f16p60_493_transcript30659_g1	.	3.61	2.3	1.84	1.6	19.97	0.66	0.64	196.82	0.37	0.29	0.37	0.35	0.27	0.84	0.16	0.1	0.43	1.03	2469.78	1906.58	4882.85	387.49	2830.89	518.16	18.73	34.37	1.53	18.97	37.07	10.06	0.33	61.31	15.96	79.5	57.9	2763.72	2050.3	1918.34	345.58	294.78	684.05
GiantSalamander_f12p60_403_transcript14785_g1	PREDICTED: 60S ribosomal protein L29 isoform X1 [Condylura cristata]	1088.42	1129.29	981.76	896.35	1363.71	1067.48	2086.85	1101.75	980.5	1787.21	1643.21	1530.99	959.22	874.18	1172.79	546.83	1784.22	994.44	1551.31	1729.96	1736.51	2118.78	2116.58	3289.62	1960.97	1771.76	1821.28	2460.75	2888.18	2057.54	1436.95	1410.37	2254.5	1106.93	1621.92	2265.52	1825.81	2187.74	3560.33	4862.12	2302.59
GiantSalamander_f24p60_3940_transcript1090_g1	desmin, gene 1 [Xenopus laevis]	8	10.44	11.55	8.04	7.61	3.11	4278.5	3046.88	2035.26	3982.97	3742.73	3089.79	33.15	25.98	65.77	76.44	12.85	29.97	82.18	8.99	240.72	833.58	95.71	521.02	281.74	326.45	264.3	305.11	319.56	400.59	44.15	71.98	66.8	109.2	44.4	33.26	4.2	5.76	7.85	19.9	6.24
GiantSalamander_f59p60_1598_transcript11532_g1	Tubulin alpha-1C chain [Larimichthys crocea]	3710.83	4817.68	4220.56	3750.1	3052.21	3330.34	3301.47	1001.79	1406.3	881.91	1410.35	759.28	396.04	439.12	393.93	162.26	501.71	282.14	705.06	945.87	752.23	674.4	605.96	756.87	695.6	666.73	562.73	460.68	621.21	501.81	1114.83	1207.08	893.02	314.68	315.45	782.06	687.15	534.05	523.34	689.35	488.42
GiantSalamander_f16p60_895_transcript13587_g1	PREDICTED: 40S ribosomal protein S3a [Chrysemys picta bellii]	1317.04	1358.18	1207.35	1151.82	1734.39	1316.48	2586.42	1364.46	1124.53	2337.78	2132.13	2128.21	1155.05	1048.59	1398.04	1089.89	1625.62	1257.51	2314.83	2642.26	2295.95	2616.76	3043.95	4184.8	2440.98	2310.85	2183.88	2762.28	2900.68	2590.53	1960.14	1842.33	2647.33	1590.14	2488.92	2763.05	2578.07	2910.36	4009.76	4765.68	4136.06
GiantSalamander_f32p60_1409_transcript28386_g1	PREDICTED: myosin light chain 3 [Tinamus guttatus]	0.98	0.98	1.08	1.72	7.5	0.73	3183.33	736.28	478.01	3717.41	2082.19	2464.46	0.14	0.07	0.06	0.28	0.29	0.29	68.33	0.67	115.51	987.6	23.15	273.95	895.12	786.79	699.17	1000.01	1259.48	1350.02	8.39	30.94	26.26	45.66	15	134.63	0.94	0.84	0.2	0.45	1.33
GiantSalamander_f6p59_2503_transcript6769_g1	PREDICTED: keratin, type II cytoskeletal 5 isoform X2 [Ceratotherium simum simum]	7.94	4.3	2.6	6.99	1.71	4.17	1.07	0.53	0.91	0.57	0.33	0.37	0.34	0.47	0.38	0	0	0.96	3454.92	4683.78	4396.16	518.53	278.12	1739.77	2099.17	2761.84	1828.64	174.4	134.76	1526.22	1513.11	1861.1	3554.43	1573.74	2664.13	2181.09	3302.15	3138.01	378.74	74.62	1231.73
GiantSalamander_f3p60_1044_transcript13217_g2	PREDICTED: LOW QUALITY PROTEIN: keratin, type I cytoskeletal 15-like [Anser cygnoides domesticus]	0.15	0.25	0.1	0.06	3.25	0.19	0.1	0.15	0.31	0.06	0.69	0.1	0.03	0.11	0.11	0.18	0.37	0.43	13.61	25.53	6.51	36.21	1093.41	196.31	84.24	148.52	106.28	315.3	387.48	350.59	0.23	0.33	1.07	43.81	5.3	65.91	23.65	37.65	114.76	366.32	496.51
GiantSalamander_f24p60_1463_transcript28194_g1	actin, alpha cardiac muscle 1-like [Scleropages formosus]	0.74	0.98	0.69	1.05	3.84	0.8	2174.08	1479.42	1483.51	4284.59	2871.17	2466.75	0.11	0.07	0.19	0.96	0.07	3.88	30.45	0.33	29.28	147.54	14.77	175.23	48.62	40.04	27.12	69.7	102.87	92.83	3.28	6.54	2.57	11.84	4.61	14.95	0.36	0.5	0.1	0.18	0.45
GiantSalamander_f19p60_903_transcript29661_g1	galectin 4 [Xenopus laevis]	104.28	110.82	98.72	102.44	118.87	89.31	450.93	214.11	128.29	357.13	354.07	292.23	66.89	60.77	120.3	72.04	75.51	84	2071.53	2060.86	2586.73	1272.87	2858.86	3270.36	2165.84	2085.9	2142.66	3185.52	2847.02	2876.47	1120.84	1208.45	1933.05	1256.68	1890.08	2391.07	2033.74	2763.1	3745.36	4642.39	4113.16
GiantSalamander_f23p60_723_transcript14013_g1	.	0.61	1.05	0.19	1.08	27.01	2.04	0.41	36.54	0.18	0.04	2.05	0.26	0.15	0.26	0.04	0.06	0.16	3.47	961.35	1089.9	1311.04	408.49	4552.88	1134.32	7.06	16.67	0	10.26	25.05	12.71	0.69	37.75	3.52	77.23	61.9	1274.43	1268.37	556.33	537.79	450.73	1309.32
GiantSalamander_f53p60_1285_transcript28640_g1	PREDICTED: haptoglobin [Fukomys damarensis]	0.13	0.06	0	0.29	0.07	0.13	0.75	0.51	0.83	0.11	1.46	0.07	2284.68	1990.2	4275.05	3170.31	1496.16	2834.46	0.27	0.42	0.43	0.45	0.17	0.07	0	0.02	0.31	0.09	0.05	0.07	0	0.02	0	0.63	1.09	0.02	0.6	0.04	0.02	0.23	0.44
GiantSalamander_f28p60_715_transcript30139_g1	40S ribosomal protein S7, partial [Merops nubicus]	1307.06	1305.13	1185.66	1209.18	1749.52	1395.51	2163.27	1174.76	1059.2	2215.97	2352.39	1937.98	929.06	803.48	1246.19	1637.76	1716.42	1139.53	1719.18	1927.19	1681.62	2335.49	2703.85	3349.95	1719.93	1680.87	1688.55	2511.28	2904.7	2080.2	1424.42	1336.97	2094.31	1512.73	2272.32	2401.16	1946.1	2127.29	3400.91	4486.35	3361.84
GiantSalamander_f18p60_360_transcript30997_g1	60S ribosomal protein L38, partial [Oryzias melastigma]	842.06	843.37	788.93	796.48	1367.82	1074.17	1857.65	1698.69	2407.8	2537.57	2791.36	2198.43	661.87	561.02	1117.12	1859.51	1235.8	896.22	1036.31	1258.65	1259.76	1623.35	3414.68	3448.96	1299.89	1324.98	1223.77	1880.32	2189.62	1545.37	1111.02	1010.11	2052.05	2130.57	2542.83	2007.64	1313.45	1565.24	2771.76	4125.5	3451.37
GiantSalamander_f81p60_1010_transcript29317_g1	PREDICTED: RNA-binding protein 3 isoform X1 [Dasypus novemcinctus]	1127.07	1106.57	1115.05	1334.7	1399.83	1654.4	2432.95	761.54	521.98	3128.58	2507.61	2587.27	843.97	782.26	1495.63	1020.48	1362.55	1734.02	2051.78	2250.32	2426.51	2811.21	2611.09	4041.78	2077.42	1948	2042.05	2676.05	2827.37	3018.83	1667.47	1645.75	2367.55	2065.97	3361.93	2531.57	2156.13	2234.26	3832.2	4030.52	4465.3
GiantSalamander_f7p60_6021_transcript71_g1	myosin, heavy chain 7, cardiac muscle, beta [Xenopus tropicalis]	0.18	0.23	0.45	0.82	3.7	0.13	3.3	0.26	0.05	1.83	0.12	0.08	0.02	0.12	0.03	0.19	0.1	1.65	210.64	0.54	445.44	4434.42	141.25	1062.91	782.49	625.5	764.62	1214.15	1459.27	1839.88	22.58	52.39	37.87	89.47	27.91	28.46	1.02	0.34	0.04	0.21	1.72
GiantSalamander_f72p60_748_transcript13871_g1	PREDICTED: 60S ribosomal protein L9 [Callithrix jacchus]	1148.81	1166	1071.27	1206.33	1915.31	1417.01	2037.84	1090.38	1018.01	2188.52	2172.66	1853.22	763.34	701.61	1037.17	930.34	1477.88	994.5	1423.31	1754.54	1529.92	1982.42	2602.32	3553.56	1543.88	1508.55	1468.75	2256.73	2532.15	1924.99	1240.16	1182.67	1836.77	1341.28	1977.59	1987.5	1651.4	1947.37	3459.29	4432.22	3200.87
GiantSalamander_f11p60_620_transcript14234_g1	ribosomal protein S10 [Alligator mississippiensis]	1594.73	1697.54	1497.53	1528.18	2241.37	1890.78	2858.27	2001.91	1719.19	2774.94	2739.7	2333.77	959	904.66	1507.5	1392.51	900.76	1334.54	1945.55	2363.67	2136.32	1987.34	3499.02	4420.16	1861.46	1904.71	1815.97	1721.49	1860.06	1904.74	1593.93	1546.51	2360.36	1834.13	2187.12	2819.79	2095.6	2293.46	3756.45	2679.04	4389.09
GiantSalamander_f3p60_705_transcript30151_g1	40S ribosomal protein S9 [Chelonia mydas]	653.18	739.84	614.62	703.53	1060.45	874.79	1411.45	1710.72	1787.45	1704.54	2096.53	1449.55	413.4	365.79	890.89	1198.38	485.24	819.8	1085.17	1330.61	1059.06	946.99	3421.42	3223.39	902.48	911.67	869.68	696.67	861.72	769.35	831.33	881.66	1108.26	1876.42	1943.58	1602.67	933	1016.72	2334.03	1571.49	4418.5
GiantSalamander_f4p60_1825_transcript10669_g1	fibrinogen beta chain precursor [Xenopus laevis]	0.16	0.22	0.01	0.05	0.14	0.13	0.51	0.84	0.92	0	0.02	0.2	83.82	3408.95	4402.54	4.76	40.96	3506.26	0	0.54	0.14	0.14	0.08	0	0	0	0.35	0	0	0	0.02	0	0	0.52	0.77	0.02	0.14	0.09	0	0.03	0.88
GiantSalamander_f2p60_2374_transcript7789_g1	heat shock cognate protein 70 [Andrias davidianus]	1956.38	1944.78	1890.59	1519.93	1197.19	1373.66	1805.76	481.67	359.62	1142.02	811.5	875.01	1328.31	1303.38	885.81	368.5	835.46	641.6	3429.97	3177.85	3245.39	1520.49	1047.34	2584.32	3435.62	3039.74	3251.46	3499.71	2891.35	2960.89	4361.67	3651.1	3100.3	811.48	1449.21	3472	3257.23	4033.47	3984.6	3723.73	1501.02
GiantSalamander_f3p60_556_transcript30514_g2	PREDICTED: 60S ribosomal protein L31 [Struthio camelus australis]	1202.07	1235.68	1112.81	1116.03	1781.32	1336.79	2012.23	1348.49	1268.7	2087.27	2095.59	1827.32	831.38	760	1242.1	2465.08	1514.44	1029.38	1445.79	1729.28	1446.52	1887.14	2995.5	3692.76	1536.51	1459.72	1431.77	2265.72	2570.89	1859.14	1386.43	1288.86	2175.08	1691.73	2539.46	2171.46	1689.93	1959.68	3226.74	4312.09	3631.2
GiantSalamander_f18p60_439_transcript30794_g1	.	937.24	988.15	1148.81	1766.58	2415.99	1967.07	63.01	45.45	52.66	128.69	155.92	84.43	1273.29	1154.79	2406.92	1566.23	1999.84	1537.07	66.82	82.87	88.43	235.83	195.43	201.26	122.5	159.93	111.23	204.06	211.56	196.85	88.52	114.41	120.46	366.68	659.06	70.29	70.79	46.65	107.48	157.33	152.53
GiantSalamander_f2p24_3211_transcript3080_g1	major alpha globin chain [Ambystoma mexicanum]	864.74	722.66	747.77	929.21	5.67	858.78	4306.43	2.11	958.44	580.96	5.48	483.29	337.6	268.83	220.25	170.85	7.58	124.1	519.58	1060.14	423.63	792.71	6.08	721.78	473.7	398.42	334.04	4.18	5.15	501.27	2009.75	1713.56	2244.65	5.69	878.87	414.01	500.7	221.11	596.19	3.57	725.13
GiantSalamander_f5p60_840_transcript29803_g1	ribosomal protein S5 [Callorhinchus milii]	957	1015.75	928.41	927.48	1617.22	1221.68	1540.56	1424.3	1336.56	1767.92	1915.42	1510.55	909.4	869.9	1819.6	1691.55	911.78	1442.09	1274.97	1702.28	1489.68	1182.43	3876.2	3559.15	1215.4	1304.52	1211.71	1238.63	1242.33	1261.59	1156.57	1167.04	1966.32	1948.68	2608.73	2096.67	1419.11	1729.05	2798.8	2366.05	4299.02
GiantSalamander_f23p60_770_transcript29934_g1	.	20.35	56.06	60.42	30.42	135.67	14.85	28.37	20.72	8.77	15.96	31.19	11.47	245.16	318.53	737.58	526.36	203.41	218.32	1786.05	2791.49	2835.68	568.59	1494.73	1544.84	1596.83	2341.92	2211.61	703.85	628.44	1064.66	1839.76	2324.2	4250.14	1772.33	2584.62	1701.78	1793.75	2793.29	1640.14	1143.31	2470.7
GiantSalamander_f2p60_1652_transcript27601_g1	PREDICTED: plasma kallikrein-like isoform X3 [Clupea harengus]	2.17	2.61	1.45	1.04	1.71	1.88	0.61	0.58	0.56	0.17	1.88	0.07	2835.9	2551.46	4248.12	714.86	2015.63	2313.19	42.33	47.36	38.42	29.09	50.44	83.64	73.03	79.45	117.14	160.41	136.7	79.76	11.14	12.65	19.38	8.61	18.22	67.28	79.32	108.99	129.02	136.44	84.42
GiantSalamander_f162p60_448_transcript30792_g1	PREDICTED: 60S ribosomal protein L36 isoform X1 [Esox lucius]	1454.33	1434.33	1292.22	1287.08	1465.44	1495.33	2415.73	887	687.44	2409.24	1918.45	1986.86	1174.17	1192.29	1556.68	2429.96	2208.35	1429.87	1856.71	2106.78	1971.5	2309.98	2164.61	2644.46	2152.75	1994.4	2056.22	2725.66	3347.4	2306.88	1741.94	1611.62	2571.83	1347.5	2432.93	2169.23	2233.52	2487.09	2850.62	4218.89	2796.14
GiantSalamander_f5p60_2156_transcript25305_g1	LOC397864 protein [Xenopus laevis]	0	0	0.48	0.27	1.93	0	0	0.57	0	0.35	1.46	0	0.55	0.26	0.01	0	0	0.33	767.17	551.33	694.46	308.36	35.86	1464.09	1521.29	1453.61	1684.49	2934.52	4211.98	1451.22	0	0.42	0	1.93	0	101.2	3.77	287.08	1298.62	2117.27	27.15
GiantSalamander_f31p60_863_transcript29710_g1	60S ribosomal protein L8, partial [Calypte anna]	1384.65	1399.66	1255.33	1334.42	2033.43	1577.18	2359.61	1744.5	1736.83	2221.81	2823.73	2210.46	1047.77	953.03	1598.78	1852.12	1403.06	1594.25	1776.77	2074.92	1814.98	2058.71	3772.8	3840.9	1601.45	1535.77	1498.31	1848.82	1802.12	1841.45	1397.76	1388.3	1897.65	1931.36	2425.14	2314.11	1810.03	1959.99	3476.17	3854.91	4195.21
GiantSalamander_f68p60_1090_transcript12879_g1	PREDICTED: cathelicidin-OH antimicrobial peptide-like [Chelonia mydas]	0.2	0.14	1.2	0.92	3.59	0.46	0.31	0.35	0.51	0.47	2.17	0.11	0.26	0.3	0	0	0.55	0.31	515.61	168.23	264.47	99.91	775.81	744.59	1374.84	985.14	2054.53	3556.31	2607.76	1371.67	0.55	0.62	0.52	0.97	1.09	67.09	12.26	88.64	1878.25	1218.18	422.56
GiantSalamander_f761p60_863_transcript13450_g1	ferritin heavy chain [Andrias davidianus]	1479.2	2494.62	2272.6	2979.95	3567.25	2897.84	943.89	590.96	387.06	1164.11	1209.61	904.94	1317.39	1831.88	2228.16	1937.5	2085.57	2292.31	1860.19	2817.01	1880.71	1855.38	3400.63	3832.89	1790.94	1870.92	2146.28	2116.86	1997.23	1570.1	1634.7	2296.35	3261.45	1665.08	1735.35	1961.53	2168.04	2206.31	3841.76	2480.17	3341.19
GiantSalamander_f123p60_1015_transcript29141_g1	apolipoprotein A-I precursor [Xenopus tropicalis]	11.62	16.95	13.84	26.85	18.28	5.82	1.57	4.87	3.99	0.21	2.17	0.38	1262.64	998.51	3728.48	3158.24	1492.3	1881.6	0.48	0.48	0.74	0.43	2.92	1.3	0.35	0.21	0.35	0.17	0.27	0.46	0.44	0.5	0.59	6.36	4.91	0.81	0.59	0.79	0.55	1.24	4.2
GiantSalamander_f5p60_1083_transcript29205_g1	PREDICTED: cold-inducible RNA-binding protein isoform X1 [Chlorocebus sabaeus]	3522.88	3450.22	4056.65	1807.31	1271.17	2232.89	1462.08	357.1	253.68	1071.08	736.6	754.87	403.99	353.12	652.31	112.6	184.31	180.06	2206.51	2104	3393.4	475.05	483.78	869.01	1864.14	1978.08	2643.69	1105.47	969.73	1013.16	1925.05	1983.33	3074.02	435.92	825.23	2189.91	1821.06	3361.54	1088.81	1376.58	733.83
GiantSalamander_f23p60_1335_transcript28518_g1	triosephosphate isomerase [Gallus gallus]	769.96	823.89	841.97	828.45	1277.89	1033.27	1804.45	992.01	672.35	2400.93	2348.54	1966.28	517.64	464.88	632.14	735.72	545.68	649.01	552.79	418.76	794.66	4037.47	487.98	1655.58	1640.5	1612.27	1341.88	2211.7	2403.18	2766.77	475	524.68	579.22	404.63	554.3	514.14	331.11	395.78	477.89	565.04	454.4
GiantSalamander_f2p31_1675_transcript11298_g1	Keratin, type I cytoskeletal 42, partial [Charadrius vociferus]	0	0	0	0	16.4	0	0	0	0.22	0	0.79	0	0.13	0.03	0.05	0.26	0.22	0.39	0.19	0.21	0.41	0.58	4055.04	17.1	0.4	0.21	0.85	1.68	0.91	0.95	0	0	2.81	83.63	8.51	0.45	0	1.05	206.81	152.01	2222.66
GiantSalamander_f18p60_657_transcript14124_g1	PREDICTED: 60S ribosomal protein L18a [Chrysochloris asiatica]	1517.13	1785.31	1497.58	1258.46	1608.14	1389.57	2505.94	921.56	830.89	1925.51	1454.36	1483.45	1098.52	1053.34	1125.63	606.22	1125.25	1046.24	2008.02	2396.15	2001.72	2178.52	2151.62	4051.3	1957.76	2024.05	2010.9	1996.07	2163.55	2031.78	1899.15	1862	2519.57	1028.93	1274.84	3297.14	2306.13	2548.44	3859.69	2653.88	2670.13
GiantSalamander_f2p60_1324_transcript12571_g1	thyroid hormone down-regulated protein (gene 17) precursor [Xenopus laevis]	1.11	0.8	1.65	2.77	0.41	0.8	0.45	1.44	0.7	0.41	0.05	0.27	0.07	0.49	0	0.34	0.06	1.03	954.28	4041.23	395.63	727.76	0.32	1108.07	932.66	1829.82	688.29	85.02	0.04	662.07	443.19	1003.32	749.77	0.09	1856.31	1216.89	3339.33	525.07	1860.27	0.44	3062.69
GiantSalamander_f7p60_441_transcript30790_g1	.	1.1	3.25	1.17	1.99	23.2	1.98	0.25	165.64	0.59	0.13	0.13	0.12	0.12	0.66	0.22	0.89	0.59	3.4	1497.35	2243.53	3091.08	313.23	4017.22	915.6	15.2	53.83	0.61	10.13	32.25	12.49	1.65	71.33	15.63	101.94	73.25	1225.16	2008.26	1137.29	350.68	230.94	638.07
GiantSalamander_f2p60_389_transcript30916_g1	RecName: Full=Hemoglobin subunit alpha; AltName: Full=Alpha-globin; AltName: Full=Hemoglobin alpha chain	3.47	2.57	4.13	7.22	11.29	4.42	27.81	334.74	4012.51	8.19	2393.79	810.48	0.95	3.79	11.19	867.6	3.07	0.8	1.64	8.21	1.82	1.99	893.37	3.51	1.79	5.53	2.23	0.66	2.64	1.72	9.6	6.54	10.04	2168.49	2896.32	2.52	2.98	1.4	3.47	10.96	508.47
GiantSalamander_f106p60_673_transcript30199_g1	PREDICTED: thymosin beta-4 isoform X1 [Nomascus leucogenys]	1659.54	1686.92	1521.96	1717.2	2032.52	1934.2	1698.17	845.06	558.8	1851.46	1287.17	1461.67	1052.61	678.92	1143.21	1048.63	1056.75	889.62	1867.23	2287.59	3988.85	1168.05	1556.57	1930.2	1392.28	1552.13	1314.78	1650.77	1636.91	1855.38	1529.08	1700.53	3266.67	1509.69	2298.81	2450.17	2526.33	3008.75	2436.98	3068.63	2672.62
GiantSalamander_f79p60_845_transcript13546_g1	.	0	0.57	0.75	0	6.96	0	0.21	0.06	0.25	0.28	0.3	0.12	0	0.42	0	0	0	0.46	290.75	187.52	3972.15	36.94	2098.25	406.08	362.69	332.51	2621.76	755.18	1190.86	133.23	0.3	2.83	81.14	15.64	4.05	147.75	72.57	3044.72	610.65	1953.16	634.38
GiantSalamander_f35p60_1304_transcript12526_g1	PREDICTED: LOW QUALITY PROTEIN: 60S ribosomal protein L4, partial [Phalacrocorax carbo]	2307.2	2420.32	1138.98	1891.92	1073.38	2037.25	2645.16	1334.64	506.07	2069.42	968.29	1743.53	1059.16	1063.77	667.02	1426.22	483.13	1156.61	2244.87	2383.94	1039.71	1918.05	1478.12	3365.14	1858.33	1766.34	877.22	626.51	732.33	1529.97	1879.69	1869.04	1045.77	862.25	2016.87	2598.04	2174.93	1001.69	3068.06	1086.55	3966.34
GiantSalamander_f9p60_840_transcript29787_g1	PREDICTED: 60S ribosomal protein L10 [Alligator sinensis]	1344.53	1419.82	1209.38	1241.12	1603.08	1504.63	2061.85	1020.92	911.2	1899.79	1777.55	1572.7	913.51	819.85	1444.85	1052.83	956.85	1178.49	1981.26	2346.14	2017.66	2017.2	3119.93	3717.62	1822.76	1809.02	1680.66	1691.41	1825.54	1875.81	1606.46	1529.86	2283.49	1579.41	1924.03	2667.02	2099.16	2324.91	3462.35	2771.97	3910.11
GiantSalamander_f2p51_2061_transcript25850_g1	Keratin, type I cytoskeletal 42, partial [Charadrius vociferus]	0.64	0.22	1.97	1.48	13.18	0.88	0.11	0.38	0.24	0.55	2.05	0.15	0.28	0.47	0	0	0.2	0.21	469.11	402.4	620.55	601.19	1596.13	1807.21	1719.01	992.34	1679.35	2510.29	2358.29	1310.6	1.4	2.88	4.13	43.59	7.11	1184.91	180.58	1609.72	3679.53	3889.89	1464.43
GiantSalamander_f23p60_737_transcript30054_g1	PREDICTED: 60S ribosomal protein L15 [Lepisosteus oculatus]	1350.79	1369.13	1224.21	1185.93	1401.33	1409.32	2390.44	986.09	955.65	2202.64	1766.19	1732.67	1042.31	984.76	1154.09	899.68	1226.27	1245.02	2023.32	2280.33	2097.23	2316	2476.86	3865.29	1966.53	1897.69	1932.76	2088.82	2321.83	2132.73	1806.18	1717.21	2196.66	1388.78	1730.77	2803.97	2212.2	2484.05	3467.86	3303.17	2902.44
GiantSalamander_f2p28_1003_transcript11908_g1	PREDICTED: protein S100-A1 [Protobothrops mucrosquamatus]	0	0	0.43	1.04	0.72	0.34	0.1	0.33	0	0.52	1.61	0	0.16	0.3	0.05	0	0.13	0.14	103.64	154.52	1074.09	80.04	85.05	280.64	812.6	816.47	1555.52	3857.56	2980.43	1447.05	0.11	0.37	5.15	0.07	0	1.06	0.31	353.01	1927.47	1344.39	72.2
GiantSalamander_f29p60_468_transcript30732_g1	PREDICTED: 60S ribosomal protein L22 isoform X2 [Chlorocebus sabaeus]	1358.23	1382.16	1250.33	1283.31	1731.51	1406.13	2073.18	693.65	531.93	1783.02	1523.77	1655.74	874.2	852.56	982.31	805.2	1651.05	931.02	1567.1	1731.96	1671.99	1926.98	1947.31	2316.99	1771.47	1599.76	1530.61	2279.6	2792.69	1894.02	1407.55	1293.06	1735.28	1013.67	1808.88	1769.2	1852.15	2022.75	2650.55	3832.03	2719.15
GiantSalamander_f2p30_613_transcript14235_g1	PREDICTED: 40S ribosomal protein S15a-like [Salmo salar]	767.57	853.12	737.79	759.46	1235.68	959.91	1366.48	575.39	483.34	1466.07	1435.66	1229.62	596.03	587.74	978.57	847.23	1241.74	755.59	1010.1	1358	1228.13	1337.27	2327.79	2371.14	1114.64	1200.17	1173.73	1803.83	2173.75	1340.56	887.24	943.7	1526.81	1313.43	1819.12	1561.2	1443.73	1618.22	2459.73	3828.71	2701.89
GiantSalamander_f2p23_2070_transcript25893_g1	Keratin, type I cytoskeletal 42, partial [Charadrius vociferus]	0.28	0.19	0.6	0.98	6.03	0.32	0.35	0.38	0.5	0.23	1.11	0.16	0.11	0.21	0.03	0.07	0.31	0.32	151.67	100.1	81.18	314.29	1084.97	502.38	752.85	685.24	895.21	2183.61	1679.16	1327.4	0.4	3.48	4.03	49.13	6.45	473.86	81.43	299.85	640.19	1047.06	645.05
GiantSalamander_f19p60_449_transcript14719_g1	cytochrome c oxidase subunit VIIc [Xenopus laevis]	1440.6	1419.54	1346.9	1328.06	1928.69	1515.34	2718.63	1283.52	835.78	3804.24	3612.1	2778.58	641.44	583.59	830.6	457.94	731.54	572.5	859.2	968.5	1089.04	972.14	725.76	870.1	1290.26	1300.1	1227.35	1687.8	1624.87	1158.28	1242.99	1295.03	1864.27	1123.21	2269.74	962.45	975.37	1307.43	1241.51	1711.6	834.62
GiantSalamander_f57p60_1108_transcript29058_g1	PREDICTED: uncharacterized protein LOC105607580 isoform X1, partial [Ovis aries]	1830.08	1864.64	1675.88	1686.61	1474.19	1999.04	800.04	153.07	143.27	1254.65	944.16	1487.02	305.68	313.76	381.96	127.53	465.08	354.22	2081.22	2367.29	2423.67	913.06	1173	1889.81	2200.28	2285.58	2694.42	2751.66	2602.29	2239.33	1638.09	1886.93	3803.11	1022.61	2099.73	1965.38	2225.64	3629	1886.18	2830.69	1807
GiantSalamander_f6p60_1098_transcript13054_g1	PREDICTED: cold-inducible RNA-binding protein isoform X1 [Macaca nemestrina]	1089.3	1195.85	1169.77	1823.21	1768.88	2179.09	814.54	507.06	372.11	1590.09	1268.72	1312.76	49.78	52.08	80.93	54.15	39.55	53.84	311.68	322.67	429.27	291.07	259.05	291.41	289.42	332.47	315.5	407.01	365.39	375.77	258.17	287.99	412.55	253.51	407.79	341.2	313.82	395.23	375.58	379.25	361.23
GiantSalamander_f122p60_819_transcript29772_g1	PREDICTED: 60S ribosomal protein L7 [Anolis carolinensis]	1450.63	1524.28	1327.9	1484.41	2017.86	1542.32	2383.86	849.1	606.64	2000.65	1548.04	1753.36	949.15	925.57	1027.54	730.66	1764.4	999.31	1692.15	1978.63	1777.09	2339.57	1783.53	3067.27	1851.66	1805.55	1785.19	2591.75	3064.57	2297.17	1553.62	1495.26	2091.89	963.24	1515.84	2163.52	2033.32	2182.25	3164.78	3801.04	2299.86
GiantSalamander_f220p60_5177_transcript200_g1	complement component C3, partial [Pleurodeles waltl]	0.99	1.65	1.17	1.21	3.57	1.78	19.96	2.04	1.65	19.55	10.2	5.15	2977.4	3692.9	1682.66	2070.69	2740.2	3233.81	1.05	0.78	1.03	0.88	1.94	0.97	0.21	0.26	0.76	0.38	0.82	0.27	0.02	0.08	0.13	0.31	0.62	0.31	0.37	0.43	0	1.63	1.34
GiantSalamander_f14p60_532_transcript30575_g1	PREDICTED: 40S ribosomal protein S16 [Papio anubis]	1341.15	1181.16	1310.54	1178.64	1525.64	1291.97	1862.5	662.26	504.96	1568.91	1284.62	1298.67	808.56	686.69	1119.14	802.28	1270.01	846.71	1742.45	1889.8	1902.21	1782.98	2155.76	2694.06	1732.53	1456.86	1727.48	2159.94	2239.02	1778.24	1471.7	1274.57	2204.08	1061.81	1546.77	1989.74	1795.17	2389.44	2841.59	3669.1	2504.78
GiantSalamander_f9p60_2977_transcript20143_g1	Keratin, type II cytoskeletal cochleal, partial [Calypte anna]	0.25	0	0.72	0.93	0.41	0.36	0.32	0.61	0.24	0.52	0.03	0	0.15	0.33	0.01	0	0	0.06	115.54	2.82	1.9	1.7	352.3	300.13	2113.22	1712.05	3651.66	3260.33	2826.81	1360.34	0.02	0	0	0	0	0.74	0.49	0.9	0	0	1.11
GiantSalamander_f2p22_684_transcript30182_g1	parvalbumin [Xenopus tropicalis]	68.95	3.6	10.87	9.29	146.17	2.09	137.38	1.81	0.73	8.27	15.94	1.31	8.27	1.8	1.35	12.8	1.13	303.24	324.63	1.54	653.33	3648.36	54.06	660.41	726.86	1405.02	761.93	611.27	505.92	744.02	3.38	6.28	9.96	10.78	3.37	111.47	5.25	5.51	2.12	2.77	15.07
GiantSalamander_f2p60_894_transcript13563_g1	.	0.54	0	0.47	0	1.73	0.25	0	0.12	0	0	3.38	0	0.34	0	0	0	0.31	0.04	1500.83	472.86	1573.21	66.46	612.66	2145.15	2004.82	792.69	1032.68	18.12	428.94	835.64	6.77	5.47	33.39	5.73	4.99	792.05	187.15	1228.85	1668.41	653.67	1753.44
GiantSalamander_f17p60_1072_transcript29222_g1	ribosomal protein SA [Xenopus laevis]	1054.69	1304.65	1218.8	1229.2	1449.22	1256.24	1784.55	1314.23	1734.43	1323.55	1412.65	991.05	590.36	533.93	997.56	1386.32	668.23	856.95	1393.41	1446.3	1206.51	1254.77	2565.45	2286.64	985.1	956.73	752.95	746.52	834.74	758.86	1120.7	1323.61	1152.33	1584.96	1687.31	1980.45	1242.04	1168.34	1861.7	1375.08	3627.59
GiantSalamander_f2p60_1617_transcript27652_g1	Keratin, type I cytoskeletal 42, partial [Charadrius vociferus]	0.66	0.23	1.47	1.1	23.43	1.06	0.23	0.74	0.44	0.6	1.92	0	0.49	0.78	0.08	0	0.28	0.42	708.07	800.61	780.9	554.13	3626.76	2273.94	2275.7	1965.72	2205.56	1335.12	2446.18	1873.65	1.64	5.24	9.07	138.04	24.57	1407.92	436.51	2046.47	2640.25	2832.72	3613.48
GiantSalamander_f2p24_1533_transcript11398_g1	PREDICTED: coagulation factor XI-like [Lepisosteus oculatus]	1.71	1.15	0.53	0.83	0.69	0.24	0.64	0.71	1.37	0.12	2.01	0.08	3625.2	3513	3204.97	265.94	2407.25	2258.41	61.67	45.03	54.14	41.09	15.56	52.03	111.11	105.62	171.65	217.79	216.32	121.17	12.31	13.92	9.44	3.8	5.03	81.09	101.28	116.66	116.3	119.65	25.12
GiantSalamander_f6p60_2975_transcript20300_g1	PREDICTED: inter-alpha-trypsin inhibitor heavy chain H3 [Chrysemys picta bellii]	0	0	0	0.09	0.08	0.15	0.14	0.17	0.3	0	3.25	0.05	488.89	1533.9	674.99	4.07	3612.19	2138.33	0.52	0.4	0	0	0.24	0	0	0	0.24	0	0	0	0	0	0	0	0.57	0	0	0	0	0.38	0.35
GiantSalamander_f2p32_2172_transcript25514_g1	LOC397864 protein [Xenopus laevis]	0.2	0	0.52	0.63	0.19	0	0.23	0	0	0	0.13	0	0	0.27	0.01	0	0.24	0	832.12	2.83	648.88	238.48	4.25	8.12	1332.89	5.08	1607.69	2431.44	13.4	5.31	0.31	0	0.57	0	0	99.74	0.13	386.45	3609.34	14.72	5.01
GiantSalamander_f2p60_968_transcript29494_g2	PREDICTED: nucleoside diphosphate kinase [Struthio camelus australis]	612.17	593.72	536.16	438.08	647.38	616.7	856.05	899.57	757.73	1013.93	1230.28	911.67	375.59	286.95	825.49	2105.8	245.68	533.81	1143.56	1540.6	1292.76	832	2850.95	2215.79	1026.69	1037.53	885.44	585.9	658.19	773.17	974	1060.38	1559.75	2172.49	2635.76	1443.65	1194.58	1237.54	1585.51	1188.39	3599.36
GiantSalamander_f4p30_3101_transcript19728_g2	PREDICTED: keratin, type II cytoskeletal 75-like, partial [Acinonyx jubatus]	1.49	0.37	1.67	1.04	11.96	0.64	0	0.23	0.02	0	2.44	0	0.49	0	0	0	0	0.06	5.82	98.65	10.52	32.41	268.94	1062.65	34.89	20.99	40.59	119.08	43.42	48.47	0.74	0	1.98	3.64	0	29.9	45.29	209.02	2521.36	3561.32	364.52
GiantSalamander_f2p46_874_transcript13638_g1	.	0.68	0.93	0.14	0.47	17.74	0.67	0.07	54.11	0.13	0.2	0.71	0.19	0.08	0.15	0	0.16	0.21	1.97	579.3	1053.73	387.69	282.92	3550.01	401.53	4.56	22.73	0.12	3.94	20.08	4.01	0.32	26.25	2.12	73.21	24.1	995.38	801.2	204.02	541.21	490.89	488.74
GiantSalamander_f2p59_2709_transcript5520_g1	PREDICTED: chymotrypsin-like elastase family member 1 isoform X1 [Xenopus tropicalis]	1.69	0.87	0.57	0.95	4.05	1.06	0.36	0.81	0.5	0.17	0.43	0.41	0.07	0.13	0.1	0.22	0.13	0.95	958.25	3537.23	247.08	193.38	68.18	1400.84	306.43	1871.37	290.4	117.39	119.74	1237.8	2082.99	3429.76	767.5	811.31	2166.63	228.57	2483.91	417.39	213.22	131.59	373.85
GiantSalamander_f11p60_4922_transcript15683_g1	reverse transcriptase-like protein [Takifugu rubripes]	0.08	0.12	0.02	0.19	0.16	0.11	0.38	0.33	0.56	0.12	2.49	0.06	3478.8	3404.61	1945.4	1724.41	2424.81	2636.8	0.36	0.29	0.19	0.08	0.09	0.01	0	0.01	0.45	0	0.03	0.02	0.01	0	0.01	0.24	0.49	0.01	0.14	0.03	0	0.6	0.99
GiantSalamander_f66p60_907_transcript29718_g1	ferritin H subunit [Andrias davidianus]	1371.6	1323.44	1254.73	1088.91	1792.89	1228.22	3465.65	499.47	775.14	943.9	1145.51	932.57	738.33	676.61	917.57	424.43	689.19	563.72	1197.93	1906.19	992.7	821.87	1190.97	1637.64	1152.35	1138.31	1157.12	883.02	944.48	856.17	1697.6	1533.51	1830.01	573.71	977.49	1465.11	1388.91	1125.41	1276.91	1445.99	1584.88
GiantSalamander_f10p60_1070_transcript29295_g1	RecName: Full=60S ribosomal protein L5-B	943.77	1030.31	888.52	1006.17	1648.81	1147.21	1004.8	888.51	1157.78	822.18	1074.11	716.3	443.03	377.64	732.47	1448.78	437.29	669.17	1053.43	1337.01	1019.11	918.1	3446.36	2717.87	837.88	835.26	821.22	660.35	755.13	737.78	696.56	690.66	971.19	1219.79	1187.99	1582.1	962.7	1111.28	2275.9	1867.24	3444.16
GiantSalamander_f34p60_916_transcript29623_g1	PREDICTED: 40S ribosomal protein S4, X isoform [Falco cherrug]	1391.03	1459.98	1178.52	1143.08	1442.39	1317.92	2320.73	838.34	706.23	2211.72	2004.18	1854.06	961.51	853.56	1206.06	1318.62	1200.04	1041.22	1906.93	2171.09	1719.99	2138.02	2190.93	3443.89	1926.98	1816.36	1754.21	2185	2276.99	2065.67	1586.1	1539.23	2057.26	1191	1781	2418.27	2088.2	2147.99	3167.84	3265.18	3088.54
GiantSalamander_f2p41_1728_transcript11049_g1	PREDICTED: argininosuccinate synthase [Pelodiscus sinensis]	36.33	42.93	38.81	44.08	23.85	27.15	3.58	2.18	1.79	4.15	7.18	2.46	2726.81	2726.59	3414.42	1434.74	2173.45	3322.51	286.44	191.21	225.05	64.55	158.38	176.93	208.37	206.96	242.31	115.53	131	129.73	226.19	219.56	158.65	61.74	87.3	240.67	154.93	288.21	256.61	131.69	184.65
GiantSalamander_f2p42_2011_transcript9840_g1	collagen type I alpha 2 [Ambystoma mexicanum]	33.55	36.68	25.51	39.57	28.51	11.01	237.43	40.2	29.96	193.57	157.18	138.34	47.64	47.63	56.46	19.89	9.48	35.37	1291.64	771.26	863.62	2654.02	265.58	1130.05	1466.73	1310.75	920.49	1019.59	1506.24	1046.84	362.02	519.11	506.43	281.51	201.97	3362.45	3209.68	1818.02	1098.23	957.75	615.81
GiantSalamander_f6p60_541_transcript14417_g1	galectin-2 [Xenopus tropicalis]	0.43	0.13	0	0.13	0.2	0.11	0.51	0.36	0.48	0.08	0.52	0.14	1591.14	1205.51	1265.75	3359.7	707.94	1200.86	0.25	0.47	0.15	0.67	0.2	0.36	0	0	0.14	0	0	0	0.34	0.21	0.16	0.07	0.54	0	0.16	0	0	0.19	0.74
GiantSalamander_f6p60_2071_transcript9372_g1	PREDICTED: alcohol dehydrogenase 4 [Xenopus tropicalis]	9.64	8.39	8.78	10.95	6.31	11.7	7.52	7.6	3.73	2.52	12.38	4.01	3359.18	3325.16	2306.73	430.86	2853.2	1946.51	29.77	19.42	36.03	53.03	15.04	43.09	35.6	34.73	30.38	44.05	66.1	51.08	14.8	10.6	8.09	19.44	12.38	66.87	100.53	79.34	39.86	50.97	51.61
GiantSalamander_f9p60_1611_transcript27691_g1	PREDICTED: actin, alpha cardiac muscle 1 [Anolis carolinensis]	6.47	2.15	2.86	3.22	31.28	0.88	25.05	34.19	7.57	22.14	4.22	6.63	0.61	0.41	0.37	1.67	0.66	55.68	231.61	1.46	364.41	3326.01	95.61	910.01	401.57	888.54	350.13	348.02	496.09	606.47	7.15	39.58	17.31	23.19	9.14	50.86	1.67	1.36	0.35	0.38	4.34
GiantSalamander_f9p60_1139_transcript13000_g1	PREDICTED: retinol-binding protein 4 [Picoides pubescens]	283.02	314.51	141.11	97.01	16.3	18.53	3.1	2.45	1.95	0.41	4.53	0.82	2704.98	2819.71	2208.84	221.64	3324.22	2351.62	154.01	82.73	174.18	154.73	25.77	53.26	86.05	66.15	74.66	47.17	137.73	67.07	5.3	7.29	8.24	0.93	0.14	131.92	134.1	98.61	20.46	46.49	17.13
GiantSalamander_f9p60_1551_transcript11688_g1	PREDICTED: tubulin beta-4B chain [Fukomys damarensis]	129.52	106.48	53.78	40.01	17.84	58.66	16.69	1.09	1.03	39.16	16.55	34.39	11.34	11.19	13.97	3.14	9.88	13.95	38.19	21.87	36.3	17.37	6.75	15.15	38.19	38.94	37.05	53.69	27.86	32.43	3200.99	3323.59	1577.6	338.63	1014.4	45.37	52.46	49.11	12.91	14.83	5.64
GiantSalamander_f22p60_1013_transcript13202_g1	ornithine decarboxylase antizyme 1 [Alligator mississippiensis]	3320.03	3279.11	2892.89	2393.9	2525.74	2999.22	1420.17	348.47	267.52	640.18	377.66	492.65	519.33	490.7	393.94	120.49	618.38	360.07	1275.07	1378.24	1350.9	733.71	390.01	931.05	1387.81	1408.68	1267.89	1058.74	1127.85	999.77	1232.38	1209.14	1153.39	229.24	358.95	1536.64	1608.89	1729.54	1403.09	1321.85	591.84
GiantSalamander_f3p33_1679_transcript11258_g1	uncharacterized protein LOC379489 [Xenopus laevis]	109.05	126.89	147.89	124.95	169.44	98.66	353.98	7.77	7.49	335.46	256.61	201.63	8.01	5.91	16.28	26.9	5.31	43.74	116.93	13.04	228.7	3317.18	80.85	477.96	890.96	898.92	681.71	1436.92	2044.27	1789.6	28.2	67.97	53.64	80.79	44.68	96.55	11.46	18.57	19.62	19.37	45
GiantSalamander_f6p60_636_transcript14206_g1	PREDICTED: 60S ribosomal protein L12 isoform X2 [Balaenoptera acutorostrata scammoni]	789.79	881.05	753.96	849.11	1215.17	1036.41	1321.65	751.62	676.36	1401.33	1230.5	1166.21	550.56	509.8	717.03	748.7	694.56	673.71	1129.83	1391.54	1114.76	1308.09	2226.95	2739.9	1153.28	1144.22	1092.77	1241.99	1296.42	1247.74	928.24	989.14	1426.44	1001.67	1522.1	1650.09	1301.64	1405.07	2290.71	2169.57	2723.89
GiantSalamander_f353p60_2229_transcript23552_g1	PREDICTED: kininogen-1 isoform X2 [Myotis lucifugus]	0	0.19	0	0.19	0.15	0	0.24	0.5	0.59	0.08	3.07	0.12	3268.91	3084.82	2507.58	839.22	3198.09	3111.15	0.51	0.43	0.13	0	0	0.06	0	0	0.47	0	0	0	0	0	0	0.39	0.3	0	0	0	0	0.59	0.98
GiantSalamander_f254p60_2594_transcript6090_g1	PXN-FBPL [Xenopus laevis]	0.31	0	0.2	0	0.15	0.14	0	0.62	0.76	0	1.2	0	2045.58	1884.9	3179.2	2025.43	1243.39	3244.7	0.17	0.37	0	0.19	0	0	0	0	0.21	0	0	0	0	0	0	0.43	0.44	0	0	0	0	0.57	0.53
GiantSalamander_f54p60_508_transcript14468_g1	PREDICTED: protein S100-A10 isoform X1 [Odobenus rosmarus divergens]	411.68	409.46	358.02	378.59	355.87	348.03	777.21	394.56	285.1	777.87	651.91	678.08	299.84	268.55	365	297.58	474.62	350.55	1505.7	1512.98	2091.8	1125.47	1200.29	1659.86	2050.68	2084.28	2255.56	2857.11	3130.55	2512.6	1475.46	1598.51	2420.85	955.94	1859.21	1523.57	1710.41	2436.33	1977.43	3241.74	1433.34
GiantSalamander_f301p60_2202_transcript24150_g1	PREDICTED: alpha-2-HS-glycoprotein [Chrysemys picta bellii]	0.04	0.03	0	0.1	0.07	0.06	0.22	0.01	0.2	0.04	2.52	0.01	1971.01	1360.34	551.01	313.06	2548.78	1195.85	0.4	0.21	0.07	0.01	0.17	0.01	0	0	0.2	0	0	0.02	0	0.01	0	0.1	0.42	0.01	0.11	0	0	0.51	0.43
GiantSalamander_f5p60_775_transcript13867_g1	somatostatin precursor [Gallus gallus]	2598.36	2326.41	1835.76	3197.46	1978.44	2702.58	0	0.44	0	0.08	0.89	0.57	0.14	0.42	0.13	0	0	0.03	1.23	0	7.4	15.19	1.23	1.58	0.04	0.04	0.07	0.4	0	0.21	0	0	0.08	0.57	0	0.11	0.28	0.12	0.47	0.24	1.76
GiantSalamander_f4p60_527_transcript14552_g1	Thioredoxin-like protein 1, partial [Stegodyphus mimosarum]	39.74	46.55	56.68	63.33	50.32	49.62	143.49	9.98	16.78	37.15	25.82	23.5	111.53	100.08	134.53	22.06	135.95	88.17	1276.74	1023.77	1749.28	477.57	713.71	1072.48	1293.38	1354.43	1733.99	2992.33	3184.56	2010.72	540.88	439.86	795.13	162.59	377.14	738.4	745.37	1790.04	1603.16	2492.83	779.18
GiantSalamander_f12p60_2194_transcript25090_g1	PREDICTED: keratin, type I cytoskeletal 42 [Sarcophilus harrisii]	0.06	0.03	0.38	0.27	0.34	0.19	0.22	0.66	0.18	0.26	0	0	0.11	0.28	0	0	0	0.04	69.66	2.37	1.46	0.81	273.03	150.83	1907.46	1589.91	3167.56	1293.76	2016.55	731.58	0.32	0.35	0.26	0.12	0	0.37	0.2	0.64	0	0	0.48
GiantSalamander_f130p60_595_transcript30335_g1	PREDICTED: dynein light chain 2, cytoplasmic isoform X1 [Chrysemys picta bellii]	1574.66	1711.6	1562.68	1325.81	1349.16	1872.97	1368.88	697.63	528.46	1895.97	1449.93	1550.86	338.33	331.47	493.33	529.98	453.92	336.97	1198.3	1249.12	1733.72	900.57	1588.77	1541.93	1492.74	1619.48	1789	2481.94	2442.69	1616.09	2139.57	2065.81	2858.87	1509.15	3154.46	1409.99	1264.31	1973.84	2005.46	2738.88	1614.39
GiantSalamander_f2p24_2746_transcript21910_g1	PREDICTED: collagen alpha-1(I) chain-like, partial [Acanthisitta chloris]	15.81	36.68	13.64	41.9	67.55	10.21	189.28	60.81	41.4	145.77	129.98	71.85	35.8	44.84	56.07	49.18	6	40.56	695.12	1211.43	371.64	2975.55	894.8	1668.29	808.27	1544.58	424.99	1182.35	632.72	752.19	111.62	497.36	317.91	490.81	360.26	2015.27	2700.09	1106.94	3148.59	1541.05	2055.64
GiantSalamander_f2p19_5618_transcript15428_g1	PREDICTED: myosin-7 [Macaca fascicularis]	0.68	0.8	0.43	1.35	1.55	0.71	1764.05	1350.33	707.59	2986.34	3147.59	2274.45	0.03	0.02	0.01	0.04	0.01	0.15	12.18	0.24	30.42	116.26	24.61	74.03	141.53	134.97	115.7	80.61	109.01	104.39	1.73	5.81	5.96	15.74	2.74	21.66	0.11	0.24	0.01	0.13	0.16
GiantSalamander_f2p25_1117_transcript12856_g1	PREDICTED: 60S ribosomal protein L19-like [Cyprinodon variegatus]	851.33	848.52	777.44	783.93	1416.84	966.45	1483.31	1298.37	1298.33	1725.96	1873.98	1529.89	519.85	450.21	927.47	2587.25	744.81	765.07	854.35	1036.79	959.66	1197.97	2892.29	2556.42	953.08	873.63	896.88	1222.73	1258.1	1150.09	779.3	758.9	1327.44	1360.76	1719.48	1257.13	862.47	1145.7	2146.25	2461.94	3147.1
GiantSalamander_f26p60_423_transcript30822_g1	ATP synthase subunit epsilon, mitochondrial, partial [Ophiophagus hannah]	1384.13	1414.48	1280.13	1321.49	2010.98	1387.09	3137.91	1505.16	1119.44	2880.29	2443.24	2494.33	937.14	926.24	1004.34	266.83	1248.98	759.78	884.12	991.74	912.1	1155.29	1227.34	1470.1	1358.29	1175.5	1140.56	1656.94	1788.71	1337.89	964.22	920.64	1269.34	671.01	1013.84	987.28	1048.89	1164.8	1522.65	1981.2	1503.61
GiantSalamander_f3p58_1756_transcript10985_g1	PREDICTED: ribonuclease 4 [Myotis davidii]	4.19	3.55	2.8	3.17	0.69	2.28	38.01	2.14	2.38	15.57	5.35	5.24	3098.79	3024.81	2593.96	124.3	2273.13	2618.86	8.39	5.89	11.62	3.36	0.49	1.13	3.54	3.99	6.01	2.29	5.09	1.76	7.69	5.8	8.37	2.87	0.54	3.99	5.75	11.81	1.44	1.12	1.02
GiantSalamander_f2p25_2108_transcript25561_g1	LOC397864 protein [Xenopus laevis]	0.35	0.17	0.22	0.8	14.54	1.08	0.09	0	0.67	0.53	2.32	0.12	0	0.01	0	0	0.33	0.2	8.23	250.51	59.33	13.88	2091.34	1779.09	27.09	117.77	55.33	171.36	168.08	198.5	0.56	0.42	0.22	0	0	2.25	7.38	90.9	3041.6	2993.84	1243.55
GiantSalamander_f3p39_752_transcript13915_g1	PREDICTED: prostate stem cell antigen-like [Pelodiscus sinensis]	1.55	1.6	0.64	0.19	0.53	1.05	0.23	0.77	0.43	0.21	0	0.63	0.04	0.26	0.17	0.08	0.11	0.11	522.8	683.47	472.17	139.89	40.55	288.45	581.4	588.99	411.49	64.02	51.44	312.86	2186.91	2384.28	3042.16	610.06	1102.79	489.83	944.77	679.65	345.85	10.69	269.73
GiantSalamander_f87p60_1275_transcript28557_g1	ADP/ATP translocase [Rugosa rugosa]	2186.18	2182.51	2102.95	1548.17	1424.49	1673.74	2116.73	628.18	351.06	1637.36	1039.3	1212.92	868.98	846.71	859.08	426.99	712.63	884.71	2571.25	2808.28	2332.58	1148.41	1157.87	2591	2179.47	2032.12	2152.19	1340.24	1395.26	1566.06	3023.42	2956.46	2481.13	1042.96	1785.14	3041.12	2674.38	2400.58	2953.35	1796.04	2036.24
GiantSalamander_f12p60_1324_transcript28594_g1	ribosomal protein L3 [Xenopus laevis]	1014.75	1223.58	1014.41	865.71	910.11	1002.85	1562.59	1024.69	830.44	1120.13	1229.9	939.63	620.68	616.37	1057.32	919.03	508.19	958.94	1500.75	1812.5	1400.77	1015.53	2153.14	2873.41	1122.91	1163.92	1108.51	650.48	806.94	794.44	1235.98	1392.11	1526.3	1221.33	1437.66	1988.47	1366.16	1423.4	2122.86	1393.44	3037.73
GiantSalamander_f4p60_3388_transcript2365_g1	PREDICTED: inter-alpha-trypsin inhibitor heavy chain H2 [Chelonia mydas]	0	0.11	0	0.26	0	0	0.27	0.43	0.55	0	2.1	0	3027.03	2657.29	304.85	142.27	2256.59	1450.47	0.31	0.24	0.07	0	0	0	0	0	0.38	0	0	0	0	0	0	0.07	0	0	0	0	0	0.49	0.75
GiantSalamander_f4p60_829_transcript29861_g1	PREDICTED: pancreatic progenitor cell differentiation and proliferation factor B-like isoform X1 [Chelonia mydas]	1786.72	2276.92	2059.23	1610.72	2244.84	1869.22	1538.13	1447.84	1097.2	1538.4	1852.14	1419.2	645.44	512.12	1092.46	1027.11	754.17	728.08	1022.18	990.04	1607.79	1145.92	1918.71	1439.47	1313.86	1444.21	1370.88	1078.97	1167.28	1169.83	519.25	634.07	855.47	861.42	646.74	1103.45	1003.39	1102.39	981.62	901.06	1590.84
GiantSalamander_f2p33_2085_transcript9527_g1	ACTG1 protein, partial [Homo sapiens]	1373.57	1444.86	1410.99	1249.45	689.47	1181.82	625.35	219.1	87.92	331.67	222.1	239.35	723.94	547.08	435.35	288.84	446.18	448.43	2369.1	1988.94	2948.72	959.45	391.88	1191.97	1671.85	1845.03	2076.66	1430.67	1288.03	1595.48	1574.76	1719.71	1729.5	268.69	227.56	2212.76	2336.12	2415.57	1554.84	1172.77	476.95
GiantSalamander_f22p60_523_transcript30526_g1	cytochrome c oxidase subunit 6a polypeptide 1 [Xenopus tropicalis]	737.85	840.91	796.22	822.92	1052.34	931.19	1402.38	1515.55	1025.77	2895.81	2927	1815.73	367.37	361.57	812.46	1158.74	383.76	669.03	459.32	513.29	567.12	457.65	941.28	873.51	630.81	672.68	606.46	573.61	600.62	619.25	821.45	938.95	877.25	1101.42	1611.44	610.18	470.27	531.59	790.31	636	1119.03
GiantSalamander_f69p60_1209_transcript28839_g1	PREDICTED: L-lactate dehydrogenase B chain [Cricetulus griseus]	550.47	557.25	537.95	495.74	540.63	487.86	1719.84	754	655.05	2922.72	2624.98	2235.7	34.6	34.31	34.67	28.32	15.01	18.3	716.71	814.89	804.74	460.25	610.6	795.51	997.63	1035.66	1122.72	947.96	938.32	937.21	955.54	994.29	976.65	449.68	807.95	929.71	1000.81	1156.34	907.66	1179.12	896.13
GiantSalamander_f2p39_1418_transcript28320_g1	ribosomal protein S6 [Xenopus laevis]	868.67	923.26	819.15	798.84	1143.19	928.12	1774.81	1199.17	1034.66	1833.12	1641.19	1634.04	742.13	704.11	1106.8	1356.61	1109.23	923.06	1217.99	1521.67	1307.39	1638.41	2275.78	2636.51	1281.29	1312.61	1339.86	1577.66	1700.18	1486.15	1027.33	1049.55	1635.53	1093.54	1602.13	1609.01	1396.68	1687.61	2522.07	2910.29	2618.9
GiantSalamander_f36p60_2711_transcript5390_g1	larval type I keratin [Rana catesbeiana]	2.82	0.8	1.05	0.32	0.51	0.54	0.28	0.67	0.5	0.19	0.05	0.18	0.1	0.24	0.03	0.08	0.12	0.31	1769.86	2909.77	1319.7	396.8	32.48	855.42	811.6	1470.55	432.04	19.32	65.29	594.81	676.48	1209.77	418.83	107.15	147.87	1502.44	2304.89	733.64	125.54	0.7	220.22
GiantSalamander_f4p60_2096_transcript25697_g1	serotransferrin-B precursor [Xenopus laevis]	0	0	0	0	72.17	0	0	2.89	0	0.55	0.45	1.89	0.36	0.14	0.07	1802.86	0.18	0.72	0	0	0	0	3.66	1.02	0	0	0	0	0	0	0	0	0	0.27	1.59	0	0	0	0	0	18.94
GiantSalamander_f2p35_3671_transcript1705_g1	.	589.93	641.12	678.3	1024.73	2079.88	995.83	518.23	2903.13	1662.92	434.19	906.27	472.94	68.99	41.75	266.91	2025.57	51.76	175.19	196.22	309.91	170.16	193.96	1434.9	547.3	135.56	153.06	118	104.72	53.49	86.79	104.24	157.64	231.09	1769.55	1693.33	224.68	143.64	208.7	455.07	333.05	1618.28
GiantSalamander_f80p60_1636_transcript27616_g1	alpha-1-antiproteinase precursor [Xenopus laevis]	0.13	0.12	0	0.11	0.07	0.2	0.4	0.29	0.52	1.37	1.97	0.88	2841.19	2852.9	2716.51	605.74	1929.01	2228.95	0.31	0.36	0.25	0.67	0.02	0.07	0	0.01	0.33	0.01	0.06	0.01	0	0	0.01	0.32	0.49	0.01	0.07	0.06	0.01	0.39	0.67
GiantSalamander_f15p60_504_transcript14554_g1	ribosomal protein L30 [Alligator mississippiensis]	927.83	949.4	879.97	722.83	874.03	945.13	1526.72	679.33	594.34	1643.07	1153.24	1233.77	631.4	599.76	926.34	703.88	1077.32	702.97	1303.34	1579.78	1387.2	1402.5	1655.34	2381.46	1321.83	1274.95	1231.78	1775.69	2140.58	1540.93	1089.98	1025.09	1696.87	953.09	1469.52	1940.9	1693.19	1762.6	2167.14	2837.04	2279.51
GiantSalamander_f2p16_904_transcript13434_g1	thioredoxin [Bombina orientalis]	25.85	58.43	23	62.87	95.68	80.56	49.47	146.88	58.68	154.32	88.6	151.37	41.56	64.74	118.55	411.56	66.22	163.65	83.7	264.3	104.29	112.62	127.87	299.64	83.14	215.84	60.5	51.15	40.81	183.22	238.68	471.87	285.61	876.02	2806.39	75.85	187.63	95.61	147.29	62.29	537.2
GiantSalamander_f10p60_1279_transcript28783_g1	RecName: Full=Prothymosin alpha; Short=Prot-alpha [Pelophylax esculentus]	1558.54	1512.95	1382.69	1909.03	1522	2012.95	899	245.07	219.22	1081.8	1008.02	866.46	408.28	345.47	450.16	293.24	569.48	399.46	1423.24	1462.44	1555.83	1014.22	1039.26	1278.54	1756.99	1810.36	1871.73	2654.25	2625.85	2128.53	1899.16	2044	2802.18	1385.51	2393.83	1326.1	1322.46	2148.94	1731.23	2203.46	1343.64
GiantSalamander_f8p60_510_transcript14521_g1	40S ribosomal protein S23 [Salmo salar]	739.07	838.02	731.39	657.43	1035.97	848.62	1449.53	837.6	705.9	1480.77	1336.8	1131.46	678.38	652.84	986.18	863.35	1030.08	850.74	1234.53	1542.78	1270.11	1449.33	1985.32	2799.76	1246.11	1288.35	1261.55	1721.84	1913.63	1473.11	1070.18	990.96	1759.42	961.72	1428.12	2120.92	1512.08	1693.64	2509.08	2640.19	2393.27
GiantSalamander_f39p60_514_transcript14383_g1	.	5.05	8.92	5.61	12.32	19.48	10.95	0.82	1.53	2.08	0.88	5.51	1.01	0	0.25	0	0	0.38	1.08	510.57	510.19	355.34	704.16	1223.79	1416.36	740.82	489.2	405.48	1482.12	1565.17	1018.82	49.48	63.56	97.19	225.61	247.62	1137.8	896.62	879.22	1928.94	2795.58	2173.76
GiantSalamander_f3p28_3123_transcript19804_g1	RecName: Full=Calsequestrin-1; AltName: Full=Calsequestrin, skeletal muscle isoform; Flags: Precursor	8.98	1.06	1.57	2.32	20.91	0.64	18.36	0.56	0.37	0.95	1.4	0.55	0.64	0.22	0.19	1.23	0.37	49.57	144.72	0.37	180.19	2793.67	35.77	462.33	411.84	494.25	337.49	502.58	664.65	788.47	4.05	12.9	8.15	11.8	4.68	33.27	1.25	0.45	0.18	0.57	2.61
GiantSalamander_f112p60_1841_transcript9950_g1	PREDICTED: alpha-1-antitrypsin-like [Alligator sinensis]	0.13	0.11	0.03	0.18	0.03	0.02	0.5	0.23	0.54	0.02	1.19	0.05	2788.93	2379.56	1424.63	187.7	1259.23	1271.37	0.33	0.15	0.24	0.14	0.41	0.01	0	0	0.31	0	0	0	0	0.02	0.04	0.21	0.4	0	0.11	0.04	0	0.41	0.62
GiantSalamander_f2p26_3460_transcript17995_g1	PREDICTED: mucin-5B-like [Pelodiscus sinensis]	3.76	0.68	0.24	0.16	0.47	0.28	0.14	0.46	0.26	0.03	0	0.05	0.05	0.17	0.01	0.03	0.15	0.59	1800	2779.76	64.1	175.59	29.65	827.87	964.88	1231.06	311.95	36.68	26.55	481.23	271.07	384.53	112.72	30.7	229.92	1162.19	1769.51	94.91	256.88	0.2	550.68
GiantSalamander_f16p60_2645_transcript22343_g1	PREDICTED: keratin, type II cytoskeletal 5 isoform X2 [Ceratotherium simum simum]	3.27	0.96	1.08	1.38	0.83	0.69	0	1.46	0.21	0.13	0	0.35	0	0.11	0	0	0.63	0.33	2778.81	1409.57	2450.65	228.92	0	134.02	1847.24	1983.11	1537.2	78.08	95.35	810.71	1511.03	1686.34	469.83	5.45	1.91	932.29	1472.59	1138.02	63.68	6.03	0.91
GiantSalamander_f6p60_1258_transcript28761_g1	PREDICTED: V-set domain-containing T-cell activation inhibitor 1-like [Alligator mississippiensis]	445.15	373.03	526.61	286.73	622.38	323.53	2766.89	153.25	376.01	398.56	741.03	307.06	135.79	82.15	116.87	18.71	328.55	30.56	289.86	413.31	225.04	285.84	364.32	167.25	251.72	156.45	205.91	165.45	368.52	147.3	981.98	714.72	758.86	273.89	248.29	174.46	155.42	101.07	94.05	329.57	126.88
GiantSalamander_f2p18_1801_transcript26864_g1	PREDICTED: vimentin, partial [Opisthocomus hoazin]	427.57	415.59	470.16	428.37	669.24	427.95	1320.29	568.4	500.9	828.84	1078.07	712.51	200.13	137.11	244.8	671.46	338.5	165.9	475.73	448.2	729.36	798.83	760.69	865.99	559.86	500.41	595.97	606.43	849.84	642.21	480.57	438.84	637.44	452.77	495.13	384.29	385.9	378.72	445.47	680.94	592.4
GiantSalamander_f57p60_797_transcript13791_g1	.	0	0	0	0	0.3	0	0	0.46	0	0.07	0.2	0	0	0	0	0	0.15	0	19.05	747.92	29.34	108.49	7.72	13.91	18.57	1369.49	26.38	906.1	8.44	8.33	0	9.76	0.28	0	0	4.84	292.48	22.96	2742.79	7.07	11.29
GiantSalamander_f2p23_2551_transcript6191_g1	chymotrypsin like elastase family member 1 precursor [Xenopus tropicalis]	4.35	0.11	0.08	0.42	0.45	0.05	0.1	0.04	0.01	0.15	0.06	0.09	0.05	0.03	0.01	0.12	0.31	0	2719.86	1.34	73.12	34.57	0.57	0.32	1392.76	0.86	62.38	33.03	0.02	0.39	1983.42	2.14	435.85	0.94	1.27	1149.28	0.67	124.45	57.79	0.03	0.17
GiantSalamander_f42p60_3282_transcript18215_g1	hypothetical histidine-rich protein [Xenopus laevis]	0.09	0.07	0	0.25	0.17	0.11	0.31	0.24	0.33	0.12	1.74	0.04	2712.24	2389.91	1274.94	1679.46	2202.44	2192.46	0.44	0.31	0.11	0.07	0.16	0.02	0	0	0.34	0	0	0.03	0	0	0	0.13	0.6	0	0.19	0	0	0.32	0.84
GiantSalamander_f2p35_2899_transcript20782_g1	PREDICTED: keratin, type I cytoskeletal 15 [Chrysemys picta bellii]	0.55	0.41	0.59	0	0.65	0.46	0.1	0.58	0.11	0.17	0	0.16	0.05	0.18	0.22	0	0.08	3	979.61	653.85	2681.86	45.9	47.02	151	634.53	1145.9	976.52	138.88	111.95	520.15	456.62	593.7	937.08	145.81	72.91	242.04	307.64	746.29	70.94	84.95	98.99
GiantSalamander_f7p60_746_transcript30036_g1	PREDICTED: cold-inducible RNA-binding protein isoform X3 [Merops nubicus]	2236.61	2348.86	2517.89	2672.6	709.13	1733.47	456.65	297.19	167.95	605.8	326.6	322.7	184.34	192.62	197.65	113.23	82.78	107.49	328.41	204.51	538.73	330.5	128.24	108.67	358.21	343.97	509.37	352.48	297.02	280.28	483.06	382.29	466.15	90.47	107.03	214.1	129.95	443.23	140.97	139.55	113.01
GiantSalamander_f10p60_731_transcript13961_g1	PREDICTED: 60S ribosomal protein L10a-like [Python bivittatus]	918.21	899.75	975.5	874.5	946.86	953.33	1444.84	509.81	511.29	1175.58	804.32	1005.7	560.54	538.09	625.69	706.26	869.62	666.48	1181.01	1358.94	1382.15	1639.21	1288.05	2662.92	1268.87	1182.64	1364.04	1456.35	1641.59	1574.01	1077.7	1055.71	1501.73	683.14	926.72	1566.86	1361.12	1821.62	2451.34	2332.89	1818.03
GiantSalamander_f290p60_1900_transcript26233_g1	RecName: Full=L-lactate dehydrogenase A chain; Short=LDH-A	1248.96	1288.94	1422.6	1279.51	1487.07	1456.63	758.18	241.24	187.21	520.29	480.72	394.78	341.62	375.13	336.56	273.3	344.93	328.71	105.11	35.38	217.13	1873.55	60.23	296.65	533.59	624.06	443.08	957.96	926.32	1206.04	97.88	116.68	129.65	46.06	60.49	80.93	27.79	40.53	56.23	56.85	38.66
GiantSalamander_f15p60_456_transcript30767_g1	.	0.66	0.83	0.7	0.6	10.29	0.82	0	0.76	1.34	0.24	1.6	0.21	0.22	0.36	0	0.69	0	1.49	330.67	344.83	417.78	243.11	2334.3	1232.43	595.25	467.57	673.03	990.14	946.51	654.62	61.28	53.27	163.39	356.45	366.26	538.65	290.2	583.54	1197.1	2009.33	2640.82
GiantSalamander_f17p60_436_transcript30724_g1	mitochondrial ATP synthase subunit f [Ictalurus punctatus]	651.81	709.91	647.08	785.35	1103.17	860.09	1634.05	829.55	530.18	2252.01	1784.5	1832.56	456.82	426.17	523.78	290.03	595.59	434.79	466.26	551.22	468.32	641.97	419.74	678.8	734.59	709.62	591.59	949.2	1034.47	868.57	609.74	589.49	770.08	324.43	747.73	535.39	545.51	601.61	796.01	1027.26	547.87
GiantSalamander_f88p60_1713_transcript10954_g1	RecName: Full=Arginase, hepatic	1.17	0.57	0.4	0.7	0.6	1.11	4.76	0.74	0.77	0.93	2.25	1.13	2151.64	2300.8	2629.6	576.53	1760.96	1966.24	21.47	6.71	20.51	1.05	0.69	1.84	1.13	0.92	1.99	8.05	4.51	9.05	3.05	3.4	5.06	1.47	2.66	2.99	2.61	6.8	2.06	2.59	1.88
GiantSalamander_f2p25_1739_transcript10778_g1	uromodulin-like protein type 2 [Rana pirica]	3.15	0.94	0.64	1.38	0.73	0.82	0.2	0.71	0.32	0.19	0.03	0.1	0.05	0.2	0.02	0.33	0.18	0.41	1252.01	1874.21	207.9	293.98	12.23	413.95	1902.74	1444.37	627.03	106.75	199.3	1035.4	1102.08	1187.28	476.54	44.49	480.29	1649.85	2624.44	286.71	714.29	0.64	547.76
GiantSalamander_f2p28_2453_transcript23694_g1	PREDICTED: apomucin-like [Microtus ochrogaster]	0.13	0	0.2	0.71	17.51	0.89	0.12	0	0.11	0.09	1.79	0.07	0	0	0	0.38	0.12	0.39	354.19	626.24	225.57	90.95	487.5	147.6	1.8	5.18	3.01	38.75	43.68	37.51	0.41	0.12	0	2.61	0.19	1459.8	319.46	256.49	2619.63	1000.94	839.94
GiantSalamander_f16p60_787_transcript29895_g2	Zgc:153867 protein [Danio rerio]	412.63	437.38	427.44	414.47	404.39	414.09	2619.26	1984.28	1185.62	2416.88	1816.51	1838.8	495.42	356.81	773.36	1157.88	477.45	477.93	1767.76	1964.23	2303.5	861.88	1773.63	1624.9	1493.37	1535.42	1574.06	1377.71	1309.5	1068.24	1483.34	1534.49	1920.57	1439.96	1799.99	1903.32	1604.84	2092.85	1824	2016.97	2072.78
GiantSalamander_f2p18_2129_transcript9195_g1	tubulin beta-4A chain [Xenopus tropicalis]	1599.9	1944.37	1354.2	2394.56	2617.77	2038.1	323.65	199.99	224.22	394.3	394.29	326.88	155.13	155.3	167.42	295.04	95.33	123.75	401.67	408.66	481.49	281.99	643.24	383.16	329.8	391.21	358.08	304.49	273.18	305.02	642.35	684.06	573.24	635.17	773.71	449.58	396.82	460.63	434.44	494.93	612.17
GiantSalamander_f3p55_2488_transcript23255_g1	PREDICTED: chymotrypsin-like elastase family member 1 [Anolis carolinensis]	2.01	0.57	0.28	0.56	2.25	0.53	0.24	0.2	0.1	0.12	0.33	0.24	0.06	0.09	0.12	0.05	0.17	0.52	1269.21	1020.13	217.08	70.07	35.2	465.97	672.24	693.15	168.31	108.28	83.71	544.78	1077.6	2421.59	742.57	996.15	2616.93	530.55	859.84	330	104.27	93.42	235.83
GiantSalamander_f5p60_1374_transcript12379_g1	PREDICTED: annexin A1 [Melopsittacus undulatus]	1.98	2.05	2.14	1.54	5.37	0.65	0.2	0.34	0.34	0.46	1.1	0.16	0.26	0.23	0.35	0.04	0.16	1.06	1098.19	667.34	1094.11	308.02	393	932.84	1096.62	1182.32	1737.95	1720.33	1508.33	1425.07	392.81	314.45	583.23	87.66	141.14	595.44	438.33	1606.37	1132.98	1445.3	583.01
GiantSalamander_f3p60_596_transcript14278_g1	serum albumin precursor [Ambystoma maculatum]	0	0	0	0	0	0	0	0	0	0	0	0	40.16	46.5	22.23	2589.44	59.21	49.26	0	0	0.34	0.52	0	0	0	0	0.07	0	0	0	0	0	0	0	0.14	0	0.34	0	0	0	0
GiantSalamander_f3p60_612_transcript14238_g1	prepro-mesotocin [Taricha granulosa]	664.45	949.96	385.68	2585.5	2519.55	1587.21	0	0.28	0.09	0	0	0.16	0.05	0	0	0	0	0	0	0	0	0	0.1	0.06	0.18	0	0	0.23	0	0	0	0	0	0	0	0	1.16	0	0	0	0.26
GiantSalamander_f19p60_558_transcript30505_g1	PREDICTED: 60S ribosomal protein L27a [Latimeria chalumnae]	883.31	923.68	828.23	801.06	1239.38	963.98	1347.35	996.4	916.67	1440.36	1419.29	1229.21	642.32	596.82	976.2	889.53	1000.07	728.75	941.21	1142.75	1003.53	1050.81	1839.59	2031.25	1084.69	1021.27	1006.72	1364.39	1530.05	1149.08	871.09	823.02	1418.08	1027.95	1385.23	1272.59	1129.4	1343.16	1907.54	2582.1	2085.09
GiantSalamander_f41p60_545_transcript14404_g1	.	1.15	0.75	1.22	0.62	3.97	1.86	0.07	0.14	0.12	0	0.22	0	0	0.07	0	0	0.07	0.2	105.34	25.85	1193.8	4.71	33.87	16.49	436.41	288.26	407.06	432.35	474.81	1094.08	0	0	83.28	0.65	0.45	22.12	6.76	1157.32	71.16	92.95	33.79
GiantSalamander_f7p60_550_transcript30627_g1	Ubiquitin-60S ribosomal protein L40, partial [Bos mutus]	1038.19	1063.36	983.27	880.22	1085.82	929.1	1743.77	604.32	502.31	1681.44	1240.59	1309.25	649.48	612.38	808.58	459.76	810.55	692.56	1350.13	1500.69	1489.93	1465.36	1474.47	2213.42	1412.57	1451.68	1386.43	1743.93	1885.12	1460.59	1429.35	1353.86	2043.77	908.47	1495.3	1951.05	1600.81	1846.54	2258.11	2548.99	1800.93
GiantSalamander_f141p60_1801_transcript10588_g1	group-specific component (vitamin D binding protein) precursor [Xenopus laevis]	0.15	0.04	0.02	0.19	0.05	0.05	0.41	0.35	0.66	0	1.85	0	2247.23	1785.83	1644.59	456.63	1932.45	1624.68	0.26	0.28	0.12	0.07	0.1	0.02	0	0	0.39	0	0	0	0.01	0	0.03	0.23	0.57	0.02	0.11	0	0	0.55	0.35
GiantSalamander_f32p60_452_transcript14535_g1	PREDICTED: cytochrome c oxidase subunit VIc isoform X1 [Xenopus tropicalis]	717.74	756.62	666.22	720.73	897.52	896.65	1719.71	789.88	451.76	2540.49	1746.06	1880.11	707.11	685.21	929.59	190.47	710.21	580.1	522.62	571.57	613.94	696.23	465.59	582.91	875.02	943.98	822.37	1164.01	1258.45	937.86	843.17	841.78	1122.45	445.52	1053.19	553.44	642.8	793.57	685.99	978.86	469.66
GiantSalamander_f6p60_1890_transcript10440_g1	PREDICTED: keratin, type II cytoskeletal 5-like isoform X12 [Anolis carolinensis]	2.96	0.99	0.57	1.81	3	1.35	0.38	1.28	0.44	1.27	0.17	0.48	0.05	0.42	0.08	0.91	0.22	1.09	1174.25	2135.7	1017.62	873.5	390.21	2037.63	1096.56	1423.6	540.57	116.84	168.2	1286.03	906.45	1165.32	974.33	673.82	1059.08	938.55	1866.07	800.29	1027.71	7.05	2531.98
GiantSalamander_f19p60_3249_transcript2570_g1	Keratin, type II cytoskeletal 75, partial [Podiceps cristatus]	1.69	0	0.43	0.44	0.68	0.35	0.16	0	0	0.54	0.01	0	0.38	0.09	0	0	0.24	0.17	1565.21	2.46	589	605.99	7.72	6.63	2515.79	3.81	1584.49	1950.91	2047.16	3.77	17.57	0.28	1.32	0	0	2117.7	1.62	695.9	582.1	1052.63	1.9
GiantSalamander_f2p31_1025_transcript29332_g1	PREDICTED: uncharacterized protein LOC101731543 isoform X2 [Xenopus tropicalis]	0.21	0	0.09	0	0.06	0.04	0.42	0	0.17	0.21	0.33	0.06	1410.73	1268.05	2498.45	1434.1	755.72	1483.65	0.24	0.18	0.17	0.06	0.16	0.02	0	0	0.12	0	0	0	0	0	0.08	0.5	0.15	0.02	0.16	0	0	0.16	0.45
GiantSalamander_f4p60_748_transcript14005_g1	PREDICTED: 40S ribosomal protein S17 [Bubalus bubalis]	783.48	784.47	368.54	693.92	625.9	863.89	1353.26	870.54	439.97	1234.49	662.98	1211.11	575.32	508.55	445.04	1030.91	422.79	733.33	1036.71	1227.7	591.93	1271.45	1180.37	2334.62	1097.03	1067.58	530.24	732.57	743.41	1272.38	813.54	829.41	675.63	508.75	1302.81	1544.93	1156.54	733.61	2238.97	1403.3	2496.9
GiantSalamander_f6p60_783_transcript29960_g1	PREDICTED: fatty acid-binding protein, brain [Falco cherrug]	2246.3	2282.64	1718	2080.77	1982.52	2489.4	887.52	319.44	175.23	742.43	456.18	605.5	22.67	22.73	25.49	24.35	38.54	22.04	17.44	8.37	33.1	118.33	12.83	25.31	45.88	55.59	34.82	56.3	72.72	51.02	11.79	12.33	9.89	16.59	18.31	13.06	13.58	10.88	6.49	15.11	12.1
GiantSalamander_f2p56_2641_transcript5909_g1	PREDICTED: inter-alpha-trypsin inhibitor heavy chain H3 isoform X2 [Nannospalax galili]	0	0.15	0	0	0.2	0	0.14	0.25	0.27	0.02	1.83	0.04	1112.08	1683.59	575.37	503.09	2483.07	1207.65	0.5	0.2	0.06	0.14	0	0	0	0	0.23	0	0.02	0.03	0	0	0	0.08	0.12	0	0.11	0	0	0.4	0.59
GiantSalamander_f25p60_876_transcript13557_g1	NADH dehydrogenase (ubiquinone) 1 alpha subcomplex, 4 b [Xenopus laevis]	800.22	793.56	772.05	817.8	1322.68	931.79	1865.85	1056.02	578.04	2471.72	1926.9	2065	410.43	384.34	607.58	290.27	352.07	311.74	478.6	551.37	577.09	665.83	498.07	584.12	842.97	867.84	859.05	1198.46	1043.71	963.08	975.81	928.68	1267.92	903.01	1773.01	514.32	549.14	777.41	765.15	836	725.8
GiantSalamander_f36p60_572_transcript14330_g1	PREDICTED: cytochrome c oxidase subunit 6B1 [Chinchilla lanigera]	670.74	755.92	661.87	719.75	1099.17	803.28	1907.86	856.1	565.21	2470.44	1879.88	1896.1	830.15	924.46	1023.04	284.55	1101.31	852.97	562.04	733.22	629.33	722.8	494.04	808.61	752.09	830.54	673.49	816.84	990.99	804.77	800.07	813.93	982.62	433.13	878.7	631.89	734.85	699.34	804.97	1092.44	615.73
GiantSalamander_f44p60_1570_transcript27797_g1	PREDICTED: WAP four-disulfide core domain protein 3-like [Oreochromis niloticus]	0.21	0.13	0.16	0.42	2.05	0.25	0	0.02	0.22	0.07	1.37	0.09	0.15	0.1	0	0	0.34	0.25	132.14	22.36	123.72	12.64	136.52	56.58	188.11	194.82	407.57	829.96	419.6	290.48	0.05	0.48	1.05	1	0.07	20.15	2.91	195.69	443.6	314.2	177.98
GiantSalamander_f45p60_3327_transcript18537_g1	Keratin, type II cytoskeletal 75, partial [Phoenicopterus ruber ruber]	0	0	0.37	0.42	0.15	0	0.05	0.07	0	0.35	0	0	0	0.2	0	0	0	0	25.22	752.09	564.59	619.83	125.45	1126.96	50.19	1078.87	1456.1	2447.84	2049.02	1494.78	2.22	6.1	2.86	2.68	0.78	76.92	385.66	1074.96	1994	1150.9	224.01
GiantSalamander_f3p43_1145_transcript29114_g1	Eukaryotic translation initiation factor 1 [Pteropus alecto]	2395.57	2302.44	2311.74	1826.19	1816.94	1994.23	1538.51	572.49	350.86	1394.36	988.92	1253.28	405.93	406.98	466.73	157.6	275.53	282.08	967.28	839.78	1385.33	752.97	492.51	653.68	1067.6	1088.94	1111.08	1054.13	844.04	1025.16	1224.06	1286.56	1517.86	392.92	826	813.49	929.74	1316.11	804.65	774.28	660.84
GiantSalamander_f24p60_1980_transcript9970_g1	PREDICTED: RNA-binding protein with multiple splicing 2 [Lepisosteus oculatus]	10.15	13.22	6.75	8.1	2.12	5.72	2391.93	1111.95	344.37	1988.67	804.3	1582.19	8.56	7.2	7.44	2.43	1.22	2.92	6.43	7.79	4.3	2.58	2.04	2.57	4.27	3.98	2.38	1.58	2.34	2.71	18.02	23.75	13.05	3.75	8.79	5.28	6.3	2.77	3.37	2.18	5.67
GiantSalamander_f40p60_1145_transcript29040_g1	high mobility group protein-2 (HMG-2) [Ambystoma mexicanum]	1104.88	1116.76	1127.27	824.2	579.73	923.23	801.85	226.18	199.55	762.32	588.86	885.75	447.93	374.79	582	233.88	420.64	353.69	1510.56	1359.44	1696.27	647.71	704.84	821.89	1432.54	1427.56	1707.88	1674.94	1367.49	1318.37	1280.18	1291.22	2390.27	702.41	1225.09	1398.12	1361.09	2275.57	1200.26	1641.3	1042.25
GiantSalamander_f3p25_6266_transcript57_g1	PREDICTED: collagen alpha-1(I) chain-like, partial [Acanthisitta chloris]	20.06	18.4	19.25	20.08	33.57	9.46	154.46	30.96	24.73	56.07	88.85	56.93	35.18	21.78	43.09	17.14	7.16	32.77	1197.43	440.74	613.96	1289.51	407.87	1369.96	896.37	677.97	498.37	460	1158.5	792.3	237.91	322.09	267.89	262.16	188.2	2383.93	1224.32	1099	854.94	826.05	900.49
GiantSalamander_f4p60_507_transcript14543_g1	.	63.02	57.71	67.39	36.36	192.37	43.45	279.1	89.37	433.66	33.67	231.86	53.45	28.22	21.94	36.56	45.11	108.07	8	37.94	83.43	31.65	25.41	137.24	22.72	33.27	35.14	23.47	36.79	62.12	17.36	132.42	138.73	199.4	152.49	122.06	20.13	42.11	16.21	15.87	106.73	31.2
GiantSalamander_f2p60_1145_transcript12949_g2	PREDICTED: cold-inducible RNA-binding protein isoform X3 [Merops nubicus]	1103.72	1124.06	2185.9	2373.33	1151.33	1392.22	296.4	28.25	14.96	828.85	225.04	341.22	151.57	169.3	380.88	54.66	121.85	128.53	280.43	289.68	1196.72	341.18	74.06	177.61	255.01	326.96	695.89	317.15	295.63	338.84	470.1	483.08	1376.52	133.85	291.64	267.57	284.24	1101.31	438.06	245.84	115.88
GiantSalamander_f8p60_708_transcript14026_g1	PREDICTED: ATP synthase F(0) complex subunit C3, mitochondrial [Austrofundulus limnaeus]	963.24	1186.56	976.76	1066.35	1293.93	1306.41	1457.05	1296.69	952.62	2279.68	2331.14	1890.42	519.52	547.25	929.51	2372.89	364.73	803.67	794.83	954.99	839.88	764.45	1418.8	1702.35	922.03	955.67	938.27	750.64	892.53	962.46	921.44	942.17	1160.76	1383.12	1828.46	1011.85	880.45	891.96	1302.2	865.87	1879.47
GiantSalamander_f3p60_518_transcript30614_g1	.	0	0	0	0	1.57	0.7	0	3.32	0	0	3.77	0	0	0.08	0	0	0.23	0.15	128.2	140.35	75.79	141.59	760.74	112.65	0.26	1.36	0	0.84	3.42	1.08	0.1	1.5	0.99	7.8	8.41	111.02	51.13	10.95	186.8	243.68	66.06
GiantSalamander_f21p60_1706_transcript27357_g1	Tubulin alpha-1C chain [Fukomys damarensis]	1387.91	1953.71	1416.48	2345.2	1835.41	2128.22	242.93	67.91	58.57	206.26	220.05	178.57	60.61	72.44	55.9	37	228.73	115.08	86.78	109.16	93.72	237.59	123.97	226.51	97.28	117.12	77.39	195.67	293.42	205.2	80.02	95.72	61.91	72.92	61.2	117.64	109.21	57.73	136.12	188.48	110.42
GiantSalamander_f42p60_840_transcript29699_g1	Trimx protein, partial [Pachytriton brevipes]	0.09	0.11	0.73	0.75	6.87	0.41	0.16	0.06	0.14	0.42	1.44	0.03	0.24	0.24	0.03	0.04	0.18	0.15	545.69	360.35	34.12	329.74	604.88	687.23	821.33	587.41	1132.92	2148.64	2344.52	873	6.85	4.67	3.15	14.49	10.77	531.45	172.01	301.11	1628.97	1901.17	572.99
GiantSalamander_f6p60_1327_transcript12515_g2	PREDICTED: macrophage-capping protein [Alligator sinensis]	31.96	30.82	30.85	23.77	32.57	19.85	55.26	26.43	23.66	34.74	52.27	31.7	309.86	150.66	285.22	504.43	275.81	282.97	2006.26	2343.66	1703.3	624.28	1120.56	2058.63	1990.78	2263.73	1987.04	1020.93	905.45	1557.95	1323.31	1334.83	1752.7	861.84	1446.03	1514.66	1714.11	1932.94	1277.93	938.4	1833.36
GiantSalamander_f70p60_1531_transcript27961_g1	PREDICTED: elongation factor 1-gamma [Chrysemys picta bellii]	629.3	666.26	621.57	648.48	805.84	736.3	882.96	579.48	500.52	851.96	908.71	695.29	320.68	291.03	543.59	970.62	317.3	534.15	865.98	1007.3	816.63	811.13	1683.16	1924.48	623.1	583.78	568.51	460.8	545.48	558.98	640.72	656.5	727.23	833.07	1015.15	1152.13	744.89	796.77	1624.24	1106.57	2329.63
GiantSalamander_f16p60_1191_transcript12775_g1	RecName: Full=Glutathione S-transferase P 1; AltName: Full=BBGSTP1-1; AltName: Full=GST class-pi	358.29	462.33	407.5	445.49	569.97	372.95	143.63	69.85	50.75	172.69	158.9	73	788.46	770.04	990.93	662.14	627.8	703.77	1432.86	2328.11	834.72	594.94	1132.16	1040.89	1034.25	1373.87	822.38	358.26	493.65	472.82	1294.45	1677.41	1241.23	906.63	676.35	1894.92	2309.88	1301.4	1660.3	1018.27	1076.38
GiantSalamander_f2p28_2754_transcript21613_g1	PREDICTED: inter-alpha-trypsin inhibitor heavy chain H3 [Pelodiscus sinensis]	0	0	0	0.17	0	0	0	0	0.6	0	0	0	2325.46	42.51	48.67	1.76	13.71	10.42	0	0	0	0	0	0.04	0	0	0.07	0	0	0	0	0	0	0	0	0	0	0	0	0.05	0.11
GiantSalamander_f3p29_3698_transcript1541_g1	PREDICTED: fibrinogen alpha chain [Xenopus tropicalis]	0	0	0	0.05	0.01	0	0.03	0.15	0.53	0	0	0	691.37	2323.41	579.94	6.94	8.53	1313.07	0	0.2	0.02	0	0	0	0	0	0.4	0	0	0	0	0	0	0	0.03	0	0	0	0	0.03	0.72
GiantSalamander_f4p60_4710_transcript399_g1	PREDICTED: myelin proteolipid protein isoform X1 [Pelodiscus sinensis]	199.89	452.97	705.87	573.91	2322.43	98.14	0	0.11	0	0.02	0.04	0.06	0.05	0	0.03	0.02	0.01	0.03	2.19	0.73	3.4	62.68	2.71	4.51	3.87	3.54	3.22	5.13	5.01	4.78	0.07	0.19	0.19	0.75	0.35	0.82	0.94	0.61	0.82	1.31	0.96
GiantSalamander_f6p60_1505_transcript28051_g1	PREDICTED: tubulin alpha-1A chain-like [Xenopus tropicalis]	728.8	910.38	766.55	795.75	399.54	769.27	15.04	6.62	4.8	8.82	5.51	5.82	6.28	3.81	8.52	1.73	3.07	11.46	20.84	11.31	27.42	27.55	12.24	25.49	19.74	13.04	18.63	30.72	15.56	17.8	2141.56	2313.12	1001.04	680.55	1374.58	25.13	19.18	24.26	7.7	7.34	8.85
GiantSalamander_f28p60_1191_transcript12862_g1	PREDICTED: beta-2-glycoprotein 1 [Chelonia mydas]	8.76	11.03	10.48	8.63	2.59	1.22	58.95	107.3	22.06	49.41	31.67	42.82	2053.52	1956.07	2311.88	310.49	1244.56	1429.27	0.32	0.12	0.28	6.97	0.63	0.22	2.15	1.75	1.79	4.76	3.35	2.75	0.02	0.05	0.09	0.29	0.25	0.08	0.06	0.04	0.02	0.34	0.49
GiantSalamander_f14p60_1806_transcript10754_g1	isocitrate dehydrogenase 2 (NADP+), mitochondrial [Xenopus laevis]	869.57	789.11	365.42	478.62	213.35	577.2	2263.49	895.02	306.15	2294.62	917.73	1805.02	673.23	613.83	432.37	593.04	336.57	849.24	439.12	438.58	258.85	770.17	137.27	694.51	643.8	669.7	296.06	240.46	313.01	669.52	775.2	830.78	325.2	182.68	638.35	438.27	378.56	167.3	350.12	136.04	453.18
GiantSalamander_f41p60_529_transcript14384_g1	PREDICTED: protein S100-P [Chelonia mydas]	1.35	0.41	0.47	0.93	7.34	0.11	4.6	0.68	0.38	0.74	1.25	0	10.16	0.78	5.35	0	0.29	5.06	726.8	503.2	898.04	360.11	685.08	941.02	951.7	826.21	1071.26	1961.6	2014.44	1154.24	48.1	62.49	164.3	64.01	79.6	661.94	531.34	1005.65	1321.82	1965.16	662.78
GiantSalamander_f12p60_971_transcript13400_g1	RNA-binding protein AxRNBP [Ambystoma mexicanum]	1068.46	1013.75	1050.46	750.48	673.58	853.32	1162.64	619.22	543.25	649.67	477.71	496.74	695.85	670.14	978.26	335.95	830.11	811.42	1764.09	1840.91	2275.92	679.74	1067.07	1362.45	1499.99	1386.88	1556.45	940.97	888.77	1095.19	1741.3	1821.2	2188.14	901.59	1302.31	1708.45	1307.84	1975.16	1454.41	1532.72	1499.38
GiantSalamander_f6p60_512_transcript30561_g1	PREDICTED: ATPase inhibitor, mitochondrial [Gallus gallus]	582.3	607.52	577.43	548.83	973.87	693.79	1459.11	574.47	485.25	2268.7	1817.81	1436.33	270.36	249.19	328.5	198.84	192.65	261.05	292.04	415.65	357.8	303.83	342.03	536.55	394.61	432.47	359.12	377.11	360.86	386.94	395.37	405.46	529.04	311.79	454.17	524.36	323.34	370.43	457.82	499.24	435.71
GiantSalamander_f38p60_766_transcript29966_g1	ATP synthase subunit O, mitochondrial [Xenopus tropicalis]	558.06	540.88	516.68	492.06	527.07	580.61	1468.84	413.82	298.82	2146.88	1562.05	1644.38	343.54	347.13	399.26	144.37	412.07	292.96	392.63	425.33	472.72	488.57	298.3	449.62	573.7	574.85	568.13	724.16	804.09	648.07	581.46	557.9	633.57	221.6	420.3	413.23	467.99	529.36	596.17	675.93	399.5
GiantSalamander_f4p60_1423_transcript28315_g1	hypothetical protein DAPPUDRAFT_116839 [Daphnia pulex]	1.18	2.04	1.43	2.73	9.87	2.55	0.66	3.37	1.35	4.74	5.04	2.17	0.23	0.51	0.62	1.26	0.61	1.17	298.01	278.96	201.4	132.23	968.4	606.81	302.34	454.07	1102.9	1008.66	1081.95	517.54	29.61	25.59	19.67	28.21	50.01	138.28	120.88	416.14	1848.95	1476.67	726.08
GiantSalamander_f46p60_1537_transcript11672_g1	uncharacterized protein LOC379455 [Xenopus laevis]	39.35	38.5	39.93	39.6	31.88	33.96	154.18	30.05	21.62	204.9	96.53	152.55	99.93	66.34	87.66	46.24	192.87	76.71	1616.7	1577.04	1317.75	941.94	421.3	1242.38	1610.86	1384.44	1462.28	1782.42	2092.98	1578.62	1083.14	1054.52	1176.21	366.12	625.97	2012.95	2259.98	2234.07	1549.39	2087.2	833.98
GiantSalamander_f8p60_980_transcript13366_g1	cold-induced RNA-binding protein [Pachytriton brevipes]	931.4	966.76	879.3	723.01	924.51	957.26	888.56	400.69	241.14	912.49	767.4	871.79	441.9	384.7	706.32	447.57	441.01	494.22	1168.74	1266.7	1416.12	653.89	1195.4	1453.25	1187.37	1210.34	1253.76	1491.3	1308.5	1316.53	1084.33	1062.99	1724.35	1307.22	2221.92	1337.35	1222.43	1445.7	1483.04	1848.88	2113.42
GiantSalamander_f2p23_2833_transcript20935_g2	cytokeratin type II [Notophthalmus viridescens]	0.08	0	0.46	0.67	0.51	0	0.12	0	0.11	0.21	0	0	0.11	0.25	0.03	0	0.03	0	122.98	0.09	0.85	0.83	116.67	0.18	2217.25	0.99	1998.98	1727.35	1564.81	0.77	0	0	0.04	0.08	0	0.43	0.01	0.4	0.04	0.09	0.34
GiantSalamander_f10p60_606_transcript30424_g1	uncharacterized protein LOC415253 [Danio rerio]	479.28	468.6	490.46	542.43	677.46	617.21	1261.08	859.36	603.14	2216.7	1668.16	1485.53	283.37	255.83	462.18	415.95	200.73	345.2	377.28	436.49	476.5	336.87	437.65	588.95	479.25	495.43	488.43	417.58	444.22	508.24	544.76	550.99	759.01	543.81	906.08	454.05	349.11	522.7	539.31	375.26	626.25
GiantSalamander_f9p60_1068_transcript13163_g1	PREDICTED: 60S ribosomal protein L5 [Protobothrops mucrosquamatus]	568.54	574.96	497.2	594.18	734.22	628.84	1106.58	264.07	217.61	1073.83	820.64	850.71	451.23	406.8	495.47	389.83	846.03	568.98	926.48	1059.87	835.85	1406.51	1039.93	2030.14	974.27	924.16	896.49	1341.48	1481.61	1245.32	760.48	696.93	959.7	488.92	774.9	1284.59	1090.14	1132.03	1950.01	2208.06	1441.65
GiantSalamander_f102p60_1999_transcript9757_g1	toe pad keratin 4 [Hyla cinerea]	4.77	3.27	3.22	0.93	3.72	10.55	0.11	0.49	0.36	0.11	0.34	0.15	0.09	0.21	0	0	0.21	0.31	442.57	85.8	1660.84	29.08	167.18	73.12	700.16	1008.13	1181.32	917.85	467.9	1192.49	78.6	116.21	196.11	56.19	108.08	86.62	50.78	147.01	130.06	161.32	165.16
GiantSalamander_f4p60_479_transcript30642_g2	PREDICTED: 40S ribosomal protein S17 isoform X2 [Chrysemys picta bellii]	0.14	0.36	683.54	1.21	987.72	1.28	0.49	0.86	427.43	0.21	821	0.56	0.19	0.31	571.19	0.31	831.75	0.28	0.46	0.21	1113.44	0.41	1147.17	0	0.11	0	903.6	1357.47	1525.79	0.09	0	0.28	1089.77	586.57	0.24	0	0.33	1274.27	0.1	2196.22	0.44
GiantSalamander_f2p60_683_transcript14091_g2	larval alpha-globin [Hynobius retardatus]	6.84	13.12	11.87	11.55	8.55	12.17	36.81	1.18	4.66	9.97	4.59	8.76	4.94	5.5	6.17	1.78	9.82	2.21	5.05	17.01	5.2	8.53	5.82	9.27	4.75	6.5	6.01	4.73	4.28	8.47	15.55	30.13	32.83	1.89	9.5	4.47	9.69	4.36	4.44	5.43	7.47
GiantSalamander_f3p38_576_transcript14371_g1	Chain A, Solution Structure Of Calcium-s100a13 (minimized Mean Structure)	28.95	22.84	16.95	17.62	31.24	26.42	86.6	76.26	40.76	85.85	68.9	81.57	42.7	36.76	64.89	137.81	84.75	76.65	1372.56	2004.31	606.98	551.47	1256.14	1715.55	1839.4	1665.5	1079.94	1246.27	1217.23	1283.3	880.46	818.68	920.99	758.73	1396.58	1637.95	2105.02	1401.24	1989.82	1951.05	2162.37
GiantSalamander_f2p60_2048_transcript25900_g1	fibrinogen gamma chain precursor [Xenopus laevis]	0	0.17	0.02	0.04	0	0.14	1.35	0.21	0.34	0.07	0.39	0	1089.24	1380.92	2125.76	17.72	552.17	1082	0.16	2.78	0.95	0.37	0.38	0.17	0	0.14	0.26	0.02	0	0.13	0	0	0.12	0.25	0.36	0.75	0.8	1.06	0.77	0.7	0.58
GiantSalamander_f13p60_710_transcript30053_g1	ATP synthase F(0) complex subunit C3, mitochondrial [Xenopus tropicalis]	369.76	381.44	330.84	348.61	278.84	416.18	1373.62	296.98	270.81	2119.63	1392.4	1364.53	401.34	419.35	508.23	127.41	301.68	340.14	315.03	311.44	483.82	301.15	157	367.47	529.15	589.37	550.73	638.48	683.1	653.82	619.79	639.84	779.76	180.64	448.6	380.61	383.69	529.78	372.54	493.57	174.96
GiantSalamander_f6p60_1465_transcript28187_g1	hypothetical protein DAPPUDRAFT_116839 [Daphnia pulex]	0.58	0.88	0.71	1.61	2.45	0.9	1.1	0.29	0.49	1.94	1.26	1.65	0.23	0.2	0.08	0.06	0.3	0.7	696.68	262.63	148.11	86.24	316.4	516.29	690.09	533.14	844.66	2069.99	1287.4	749.14	80.8	42.7	8.85	19.59	41.66	307.69	145.05	244.65	912.74	828.27	396.64
GiantSalamander_f2p22_1475_transcript11955_g1	PREDICTED: annexin A1 [Melopsittacus undulatus]	2.09	1.22	1.79	1.47	1.57	0.5	0.22	0.37	0.09	0.45	0.51	0.14	0.2	0.29	0.08	0	0.38	0.41	1299.68	574.96	1163.05	351.17	66.48	456.62	1387.25	1540.72	2034.05	2061.33	1963.58	1688.82	506.35	396.79	356.25	21.42	29.64	571.67	516.28	1425.26	757.67	881.33	117.67
GiantSalamander_f2p19_1686_transcript27445_g1	PREDICTED: fibrinogen beta chain [Geospiza fortis]	0.06	0.03	0	0.05	0.04	0.07	0.14	0.03	0.26	0	0.87	0	2058.46	1259.99	840.94	385.84	1050.15	952.07	0.12	0.2	0.13	0	0.01	0.03	0.01	0	0.32	0	0	0.06	0.02	0	0	0.05	0.09	0	0	0	0	0.28	0.25
GiantSalamander_f6p60_530_transcript30565_g1	PREDICTED: protein S100-A2 [Aotus nancymaae]	0.34	0.27	1.3	0	1.48	0.55	0.38	1.2	0.82	0.66	0.31	0.36	0	0.54	0.27	0.4	0	0.93	512.45	839.51	899.25	222.94	408.15	664.9	193.78	209.66	148.64	25.23	15.1	77.93	69.43	77.72	161.6	59.11	102.78	978.69	2056.62	1364.87	290.78	80.84	1047.34
GiantSalamander_f11p60_838_transcript29683_g1	Wu:fj06d02 protein [Xenopus laevis]	471.46	470.31	425.86	469.04	614.75	550.99	950.92	483.98	396.8	995.07	1044.74	847.52	399.93	340.86	548.8	1440.09	548.56	524.59	855.2	1039.33	795.39	1090.4	1458.92	1740.63	889.43	799.5	776.2	1009.64	1039.21	1015.05	718.18	679.13	1018.79	839.44	1297.13	1105.98	985.45	1011.93	1693.12	1587.77	2043.86
GiantSalamander_f6p60_572_transcript14340_g1	Finkel-Biskis-Reilly murine sarcoma virus (FBR-MuSV) ubiquitously expressed [Alligator mississippiensis]	697.58	767.77	646.9	659.72	913.45	807.65	1065.78	503.06	486.68	1093.33	1054.43	849.75	450.58	393.45	592.62	774.11	686.45	509.09	849.84	1006.44	918.17	995.8	1370.65	1679.39	933.69	930.78	874.42	1237.6	1396.59	1058.69	873.61	845.28	1333.01	709.14	1133.14	1276.53	970.22	1206.93	1692.86	2048.54	1529.34
GiantSalamander_f35p60_733_transcript13969_g1	PREDICTED: retinoid-binding protein 7 [Odobenus rosmarus divergens]	0.06	0	0	0.07	0.44	0	0.48	0.08	0.75	0.13	0.45	0.08	686.31	666.55	868.34	1477.91	581.3	956.66	14.08	12.73	2.26	26.16	113.78	46.73	20.35	14.21	13.03	12.72	14.82	13.49	2.34	1.68	1.25	7.2	4.86	17.81	8.58	7.97	20.97	27.4	38.82
GiantSalamander_f4p60_534_transcript30578_g2	peripheral myelin protein 2 [Xenopus laevis]	1.14	90.67	80.27	55.63	0.33	0.59	10.74	127.13	3.35	509.65	1.78	4.72	0.14	2.08	5.56	2.54	0	0.22	27.57	840.55	776.9	500.82	9.97	15.82	31.37	1312.18	2040.17	30.13	21.61	18.39	4.75	243.2	447.01	1.04	3.58	24.9	964.51	1726.17	1673.27	24.34	13.1
GiantSalamander_f5p60_561_transcript14393_g1	Phosphatidylinositol-4-phosphate 3-kinase C2 domain-containing subunit alpha [Myotis davidii]	451.11	477.51	424.46	406.71	778.64	536.2	836.44	732.05	774.71	924.55	1029.28	773.19	382.51	365.16	721.42	719.14	553.23	539.99	618.67	812.24	732.2	650.44	1709.85	1678.15	633.87	654.55	593.28	754.17	816.32	711.6	549.55	535.3	919.77	970.94	1350.8	938.91	794.94	877.9	1458.22	1727.67	2024.45
GiantSalamander_f22p60_2082_transcript25658_g1	enolase 3 [Xenopus laevis]	10.5	3.75	7.72	4.47	10.77	3.8	248.05	100.37	62.53	218.17	175.45	126.68	4.18	3.27	3.54	2.52	6.19	27.32	91.19	6.06	213.37	2023.47	48.61	275.42	651.38	756.82	617.27	949.01	1219.22	1200.94	9.16	24.81	16.07	15.83	5.87	54.85	7.11	4.7	4.73	3.7	7.91
GiantSalamander_f31p60_1113_transcript29133_g1	PREDICTED: cold-inducible RNA-binding protein isoform X1 [Pan paniscus]	9.5	8.88	9.58	43.42	40.55	57.36	56.41	25.08	14.26	298.39	203.1	210.98	24.22	25.98	45.19	226.98	114.81	191.6	75.74	109.84	80.28	144.85	209.03	373.81	102.18	110.39	109.81	253.73	236.84	252.79	96.33	92.14	122.64	293.28	586.04	79.25	73.61	78.94	331.63	302.46	413.71
GiantSalamander_f9p60_873_transcript29721_g1	PREDICTED: galectin-4-like [Xenopus tropicalis]	0.13	0.37	0	0	3.47	0.02	0.12	13.93	0	0.02	0	0.06	0.08	0.02	0	0	0.16	1.08	597	746.2	764	179.61	2005.32	224.89	1.54	1.88	0.05	2.73	10.77	1.84	0.34	5.31	0.11	8.17	4.4	475.9	585.96	173.21	129.02	329.93	151.57
GiantSalamander_f2p23_777_transcript13836_g1	ferritin heavy chain [Andrias davidianus]	200.02	293.5	1300.78	1161.85	869.51	773.8	231.67	21.25	43.08	283.08	161.1	178.43	242.37	266.85	849.2	246.39	1447.58	890.05	396.67	437.08	785.72	1455.47	520.25	1323.07	345.32	287.78	1704.91	1053	1090.49	774.66	596.54	760.74	1987.11	79.31	176.25	449.63	362.29	1373.86	1622.72	851.41	429.34
GiantSalamander_f2p33_4260_transcript709_g1	.	514.92	653.56	772.06	897.83	813.68	701.95	415.59	1985.01	1196.24	429.16	611.17	365.03	85.09	59.47	326.77	979.49	46.69	168.69	176.94	229.29	187.3	147.47	721.43	318.7	110.46	146.76	131.59	86.29	42.6	71.81	129.32	189	223.99	935.15	947.47	169.95	122.88	192.64	286.36	166.31	789.36
GiantSalamander_f17p60_1419_transcript12170_g1	PREDICTED: creatine kinase B-type isoform X1 [Cariama cristata]	1746.39	1962.86	1793.96	1424.05	1361.29	1410.67	278.25	201.74	179.26	374.67	326.25	268.38	58.68	51.23	92.99	23.74	64	45.41	7.96	1.94	30.5	96.15	9.83	23.15	40.06	28.34	43.06	49.43	87.18	71.88	16.73	20.82	78.72	24.63	11.69	8.43	7.83	10.61	3.4	23.03	11.48
GiantSalamander_f5p60_313_transcript31130_g1	Leukocyte cell-derived chemotaxin 2 [Anas platyrhynchos]	1.07	0	3.11	0	0	1.27	10.45	1.62	30.68	0	1.45	4	81.35	129.69	303.17	1962.09	130.25	127.98	10.83	40.35	6.79	12.57	38.31	41.45	4.74	15.88	9.17	7.05	2.63	9.65	18.18	27.65	27.09	291.65	144.3	16.8	14.5	6.35	23.28	3.64	82
GiantSalamander_f2p19_3305_transcript18752_g1	fibrinogen alpha chain precursor [Xenopus laevis]	0.05	0.08	0	0.1	0	0.03	0	0.23	0.16	0.02	0	0	1960.22	1206.79	390.51	1.79	669.67	229.81	0.07	0	0	0.06	0	0	0	0	0.24	0.02	0	0	0	0	0.02	0.15	0.02	0	0.04	0.04	0	0.08	0.41
GiantSalamander_f14p60_1103_transcript29149_g1	cornifelin homolog [Xenopus tropicalis]	10.05	9.07	9.57	12.91	12.52	10.96	0.28	0.33	0.17	0.31	1.01	0.27	3.45	3.24	5.25	2.58	1.48	6.38	612.63	283.99	1767.64	97.05	686.63	630.8	645.54	741.79	1046.12	866.63	608.31	802.89	285.33	275.53	440.75	301.52	444.3	211.97	130.05	862.26	1007.34	473.65	813.12
GiantSalamander_f2p39_3119_transcript19507_g1	PREDICTED: phospholipase A2 inhibitor and Ly6/PLAUR domain-containing protein-like [Xenopus tropicalis]	0.03	0.03	0.09	0.04	4.17	0.33	0.08	0.17	0.05	0.06	2.01	0	0.2	0.1	0	0.1	0	0.03	0.22	39.39	12.14	37.79	852.23	0.13	0.08	292.52	543.64	0	489.06	0.05	0.36	0.13	0.17	0.23	0.04	0.33	0.41	76.8	1936.99	928.37	0.31
GiantSalamander_f57p60_7091_transcript15231_g1	carbamoyl phosphate synthetase, partial [Litoria caerulea]	0.16	0.14	0.07	0.19	0.16	0.15	0.16	0.11	0.3	0.04	0.63	0.02	995.35	1014.85	1930.89	898.06	736.4	1336.74	0.1	0.18	0.11	0.05	0.06	0.02	0	0.01	0.13	0	0.02	0.01	0.03	0.01	0.01	0.21	0.21	0.01	0.08	0.01	0	0.17	0.22
GiantSalamander_f20p60_870_transcript29724_g1	PREDICTED: fibroblast growth factor-binding protein 1 [Chrysemys picta bellii]	132.91	210.56	130.1	189.85	269.81	119.72	5.18	1.97	0.92	4.38	1.24	2.03	10.9	2.71	27.03	11.67	1.66	1.39	813.02	701.67	1496.86	192.75	266.36	392.49	771.2	1022.38	1026.41	1925.47	1104.39	1655.91	1254.22	1215.1	1065.48	357.21	794.2	936.19	1049.51	1614.47	516.14	525.26	399.58
GiantSalamander_f13p60_757_transcript13897_g1	PREDICTED: lipocalin-like [Chelonia mydas]	1530.9	1920.07	1377.66	1673.09	959.14	419.73	41.48	31.77	41.36	25.72	48.25	22.49	71.07	46.52	79.85	92.79	49.61	7.43	322.58	449.06	450.81	173.4	533.3	323.75	69.43	56.27	53.93	30.17	41.89	32.54	24.37	29.93	55.99	69.05	26.83	274.11	313.12	241.43	171.5	278.57	120.46
GiantSalamander_f117p60_4077_transcript796_g1	PREDICTED: LOW QUALITY PROTEIN: WAP four-disulfide core domain protein 3 [Zonotrichia albicollis]	1.65	1.19	0.94	2.23	0.94	1.06	7.42	0	0.26	3.57	0.89	4.01	1920.03	1233.75	872.78	0.32	562.44	659.82	276.5	114.02	184.59	47.3	0	64.35	232.01	169.38	496.24	131.13	65.83	133.33	16.03	8.43	15.13	0.08	0	191.62	75.02	315.79	69.27	29.26	0.4
GiantSalamander_f7p60_839_transcript29834_g2	thioredoxin [Bombina orientalis]	153.45	244.13	148.75	252.11	162.32	264.59	147.66	49.87	22.48	330.38	112.47	241.19	232.21	271.74	349.85	190.46	265.01	323.27	476.79	640.91	456.75	387.87	89.78	297.13	491.85	782.96	337.75	193.61	195.32	610.97	1531.36	1913.27	1070.24	439.37	1322.11	327.16	630.25	381.27	208.89	109.23	204.75
GiantSalamander_f4p60_3157_transcript19253_g1	PREDICTED: tubulin beta chain [Gekko japonicus]	1304.25	1542.51	1168.65	1907.12	1555.69	1899.88	260.66	54.03	44.68	327.25	210.04	250.53	128.53	120.7	139.49	59.21	72.35	105.55	327.43	338.24	420.72	217.76	181.1	284.32	268.25	310.17	307.6	245.17	214.12	258.81	530.58	560.59	535.46	157.06	247.5	355.82	328.96	407.43	319.49	270.57	247.45
GiantSalamander_f36p60_1131_transcript29095_g1	PREDICTED: cold-inducible RNA-binding protein isoform X3 [Merops nubicus]	1589.44	1663.01	14.24	11.09	1701.67	1900.17	415.34	97.51	77.84	3.6	423.73	495.9	226.94	231.94	4.49	0.8	180.35	198.32	455.33	450.25	8.47	2.07	219.2	330.7	367.68	465.94	3.55	477.33	405.1	519.53	622.89	667.58	8.66	310.44	617.08	427.63	406.33	6.51	2.4	450.5	285.2
GiantSalamander_f43p60_801_transcript29836_g1	.	4.84	4.02	5.36	4.99	18.02	2.44	0.28	1.63	0.36	0.83	1.13	0.27	10.96	9.02	38.82	20.08	4.08	17.33	431.64	510.96	312.1	309.13	1293.09	1036.15	479.21	442.16	422.66	824.37	666.05	603.09	613.53	556.09	681.45	1112.82	1809	591.09	464.08	609.57	1456.33	1203.97	1747.83
GiantSalamander_f3p60_1352_transcript12370_g1	solute carrier family 25 (mitochondrial carrier; adenine nucleotide translocator), member 4 [Xenopus laevis]	4.97	5.27	6.56	2.95	7.59	2.62	1332.92	864.37	666.03	1895.54	1750.77	1448.74	0.31	0.5	0.61	0.93	0.28	9.19	42.73	0.31	138.41	526.65	22.44	212.17	369.88	452.12	350.17	471.1	512.14	534.01	3.69	12.64	10.92	16.31	14.77	22.9	0.35	0.63	0.05	0.25	1.18
GiantSalamander_f92p60_2084_transcript9191_g1	prothrombin precursor [Xenopus tropicalis]	0.16	0.34	0.16	0.17	0.4	0.14	0.39	0.26	0.6	0.05	0.97	0.02	1084.36	936.85	1532.08	905.22	958.98	1879.08	1.97	0.99	2.48	0.58	2.12	2.37	0.57	0.09	0.56	0.23	0.23	0.27	1.11	0.79	1.56	2.63	3.29	1.91	0.54	2.7	0.41	1.36	2.2
GiantSalamander_f20p60_1760_transcript10911_g1	PREDICTED: reticulon-1 isoform X2 [Manacus vitellinus]	881.94	893.75	911.1	1357.74	1641.86	1319.79	6.26	2.81	1.82	4.88	3.33	2.74	0.5	0.18	0.31	0	0.06	0.08	0.39	0.24	5.51	30.76	0.89	2.9	0.42	0.87	0.75	0.84	0.2	0.69	0	0.07	0.77	0.58	0.96	0.73	0.34	0.87	1.04	1.21	2.2
GiantSalamander_f9p60_2272_transcript24632_g1	serotransferrin-B precursor [Xenopus laevis]	8.36	4.1	10.14	0.11	0	0.06	0	0.59	0	0.01	0.4	0	1613.58	1868.94	908.11	1.06	861.07	1355.07	0	0	2.21	0.41	0	0	0	0.09	0.74	0	0.55	0	0.09	0.22	0	0.19	0.18	0.7	0	0.01	2.59	3.4	1.94
GiantSalamander_f20p60_1066_transcript13078_g1	PREDICTED: uncharacterized protein LOC104401397 [Nestor notabilis]	1293.43	1229.4	1107.52	1458.37	1335.71	1651.01	436.28	122.36	67.13	529.5	358.99	485.66	224.65	214.79	237.57	63.16	260.43	207.69	427.26	456.68	458.81	398	392.75	511.29	542.82	512.23	555.37	628.67	609.89	593.09	482.65	493.12	563.37	312.36	661.5	497.2	533.15	632.52	569.97	757.55	656.18
GiantSalamander_f5p60_786_transcript29950_g1	PREDICTED: LOW QUALITY PROTEIN: 40S ribosomal protein S29 [Pteropus vampyrus]	449.82	424.62	408.13	446.29	670.05	523.17	872.94	426.65	427.89	1041.87	941.85	859.32	280.99	262.8	386.57	329.97	588.74	383.46	563.22	741.22	711.29	788.33	1029.48	1388.39	656.36	608.91	632.13	916.46	1114.7	833.63	485.74	479.5	834.67	523.02	771.95	887.51	693.59	862.88	1400.63	1823.5	1274.48
GiantSalamander_f24p60_1352_transcript28517_g2	V-type proton ATPase 16 kDa proteolipid subunit [Xenopus tropicalis]	1346.95	1507.06	1445.58	1498.2	1552.27	1608.18	185.61	32.89	23.09	199.78	154.06	148.64	142.95	129.21	134.38	54.5	121.26	110.59	264.98	279.75	286.04	134.18	68.79	151.3	231.48	242.84	225.56	216.88	184.74	195.21	300.05	310.85	307.91	66.18	99.53	284.21	307.71	297.92	238	215.04	88.71
GiantSalamander_f4p60_2305_transcript24479_g1	serotransferrin-B precursor [Xenopus laevis]	0.32	0.23	0.32	1.99	0	0.39	0.09	0.19	0.81	0.08	6.76	0	109.05	72.57	430.4	1819.13	59.82	110.6	0	0	0	0.86	0	0	0.83	0	0	0	0	0	0.19	0	0.13	0	0	0.85	0	0.66	0	0	0
GiantSalamander_f4p47_2303_transcript8211_g1	serotransferrin-B precursor [Xenopus laevis]	0.01	0.1	8.3	6.73	15.07	3.79	0.69	0.02	1.05	0	1.53	1.41	461.21	319.58	1816.18	0.09	361.81	1243.85	1.07	0	2.6	0	0	0.49	0.4	0.45	0.06	0.82	0	1.09	0.12	0	0	0.31	0.25	3.37	0.7	2.36	2.56	4.67	2.45
GiantSalamander_f91p60_512_transcript14490_g1	40S ribosomal protein S23 [Xenopus tropicalis]	534.78	522.95	513.35	514.83	736.41	579.08	920.54	253.15	250.55	613.92	436.41	516.14	373.97	407.6	320.05	169.38	639.61	370.4	784.91	917.7	865.93	976.91	640.71	1331.17	771.78	723.84	711.13	1032.24	1259.97	933.65	648.23	566.96	740.89	238.17	357.95	1147.46	974.33	1073.02	1491.96	1796.57	855.45
GiantSalamander_f2p51_2382_transcript24037_g1	keratin 14, type I [Xenopus laevis]	0.46	0.54	0.73	0.41	0.71	0.4	0.17	0.36	0.38	0.13	0	0.08	0.02	0.08	0.05	0	0.17	0.28	1548.75	1788.55	1024.28	247.26	202.38	962.44	768.65	884.12	318.84	38.38	31.14	171.2	182.26	415.06	429.24	360.26	296.18	836.75	1565.5	783.34	109.19	57.34	298.94
GiantSalamander_f33p60_1115_transcript29146_g1	PREDICTED: uncharacterized protein LOC104401397 [Nestor notabilis]	883.7	888.5	798.73	1166.46	946.69	1196.09	387.64	90.86	51.43	558.12	358.08	496.22	225.5	206.24	205.44	81.82	255.89	190.13	422.82	437.57	384.86	417.51	317.3	518.36	599.26	520.34	566.27	690.6	668.8	633.63	539.79	534.55	575.35	317.6	722.31	470.4	516.2	573.95	587.58	709.45	547.59
GiantSalamander_f27p60_412_transcript30875_g1	PREDICTED: ATP synthase subunit e, mitochondrial [Anolis carolinensis]	546.17	588.63	519.16	619.84	1022.92	788.51	1160.8	749.19	660.17	1745.11	1480.25	1469.19	281.94	277.72	462.48	176.62	378.99	312.49	285.45	382.75	418.79	391.97	400.47	569.06	460.73	478.55	456.72	602.21	667.01	558.3	439.27	468.8	692.69	485.36	863.96	429.62	369.98	474.04	547.75	747.76	502.63
GiantSalamander_f88p60_1298_transcript28574_g1	PREDICTED: phosphoglycerate mutase 2 [Alligator sinensis]	1.31	0.59	0.68	1.17	9.36	0.15	44.43	38.4	17.16	88.82	57.74	52.46	0.37	0.21	0	0.67	0.36	15.81	34.44	0.32	74.35	744.86	41.09	179.82	307.48	371.1	234.46	392.39	505.66	526.54	1.96	9.38	8.29	17.04	5.2	27.66	0.58	0.41	0.22	0.21	2.23
GiantSalamander_f3p60_1711_transcript11123_g1	annexin A1 [Xenopus laevis]	104.82	129.64	103.44	121.24	63.04	38.91	523.25	179.56	146.89	447.42	351.1	386.68	195.73	115.69	165.84	131.26	223.62	105.4	1310.52	1268.07	1385.82	832.74	644.21	1294.13	1508.65	1355.91	1419.33	1376.6	1656.92	1399.43	1454.42	1361.28	1474.47	718.14	1095.23	1413.28	1527.62	1684.46	1329.59	1760.56	1148.38
GiantSalamander_f3p60_1408_transcript28361_g2	60S ribosomal protein L17, partial [Bos mutus]	569.23	541.14	508.22	528.33	734.27	583.65	973.51	356.31	353.34	776.79	657.91	726.16	423.65	407	494.2	417.77	495.96	437.41	838.14	991.36	819.11	1022.8	1311.59	1587.86	889.45	833.83	879.72	988.38	1048.37	951.9	710.38	680.91	964.09	602.3	807.2	979.26	923.39	1047.32	1523.16	1514.02	1745.9
GiantSalamander_f2p18_2784_transcript21099_g1	PREDICTED: heat shock protein HSP 90-beta [Sarcophilus harrisii]	1450.3	1594.14	1458.19	1505.75	879.12	1331.11	735.47	151.46	108.52	723.98	441.75	507.88	384.83	434.41	321.09	445.99	405.69	564.56	949.73	952.18	872.4	1041.48	369.34	1096.78	801.11	753.86	786.4	584.77	653.05	797.85	1221.15	1220.88	816.85	284.52	381.13	1117.22	972.86	856.97	1128.11	621.83	629.68
GiantSalamander_f16p60_788_transcript13818_g1	PREDICTED: peroxiredoxin-2 [Stegastes partitus]	395.24	412.59	435.74	381.88	610.56	467.07	805.44	145.97	309.13	397.21	466.69	265.52	59.97	46.03	59.62	37.62	123.5	33.39	194.39	297.47	168.03	186.2	250.17	190.06	214.7	226.87	225.36	109.22	189.71	144.21	383.1	335.04	425.63	133.06	173.96	171.81	174.71	142.67	139.62	219.11	181.66
GiantSalamander_f3p60_972_transcript29478_g1	MGC85216 protein [Xenopus laevis]	338.02	322.83	301.62	333.43	563.42	407.4	1094.04	879.65	680.64	1716.56	1496.88	1455.84	255.34	256.96	421.93	354.99	280.1	281.07	269.15	327.03	323.72	335.9	417	489.48	404.44	443.83	421.55	537.47	496.07	494.1	417.86	429.58	585.35	466.98	818.91	302.79	307.49	414.39	498.47	626.57	581.64
GiantSalamander_f20p60_1695_transcript11280_g1	PREDICTED: pentraxin fusion protein-like [Chelonia mydas]	0.14	0.15	0.17	0.25	0.24	0.31	0.07	0.19	0.23	0	0.6	0.08	596.18	413.5	428.22	768.33	679.47	1705.96	0.12	0.33	0	0.1	0.1	0.1	0	0.1	0.13	0.01	0	0.02	0	0.05	0.05	0	0.43	0	0.13	0.03	0	0.2	0.16
GiantSalamander_f96p60_2317_transcript24256_g1	PREDICTED: complement component C9 [Geospiza fortis]	0.05	0.05	0.05	0.07	0.04	0.04	0.34	0.37	0.46	0.02	1.38	0.01	1517.48	1580.81	954.55	113.79	1688.17	1174.79	0.29	0.13	0.09	0.03	0.03	0.02	0.02	0.02	0.19	0	0.02	0.02	0.01	0.01	0	0.2	0.26	0.03	0.08	0.08	0.03	0.36	0.5
GiantSalamander_f2p21_1245_transcript12671_g1	PREDICTED: balbiani ring protein 3-like [Camelus dromedarius]	0.08	0	0	0.08	0	0.33	0	0.08	0.07	0.07	1.39	0	0	0.07	0	0	0.15	0.2	10.45	1.39	3.14	8.8	41.59	27.61	6.65	5.79	7.02	89.78	102.56	67.76	0.01	0.13	0.16	0.12	0	1.33	2.38	9.07	46.16	66.95	64.12
GiantSalamander_f20p60_1145_transcript12731_g1	LOC548390 protein, partial [Xenopus tropicalis]	0.61	0.03	0.89	0.88	5.97	0.26	0.2	0.87	0.23	0.51	0.5	0.04	0.37	0.15	0.02	0.27	0.31	0.19	1225.41	754.44	1239.41	403.63	670.51	737.35	1376.02	1038.82	1663.15	1518.29	1230.06	787.68	52.04	36.81	73	35.28	31.85	805.89	724.1	1366.36	1063.26	1296.77	614.92
GiantSalamander_f4p37_4618_transcript15781_g1	alpha-2-macroglobulin precursor [Xenopus laevis]	0.18	0.13	0.15	0.15	0.21	0.29	0.24	0.34	0.43	0.15	1.01	0.14	1186.21	942.47	999.15	709.34	1109.29	1655.22	0.19	0.26	0.11	0.07	0.18	0.13	0.01	0.07	0.21	0.05	0.07	0.1	0.05	0.08	0.09	0.27	0.4	0.06	0.08	0.06	0.05	0.46	0.37
GiantSalamander_f2p12_7096_transcript15233_g1	collagen type I alpha 2 [Ambystoma mexicanum]	16.46	18.05	14.32	19.23	20.54	6.8	134	34.04	22.24	85.27	70.47	63.38	23.86	24.84	30.67	10.91	5.1	17.82	730.98	437.52	503.17	1188.2	246.21	670.8	727.4	698.55	483.22	450.88	729.69	494.14	203.19	290.52	261.9	172.19	145.45	1655.14	1626.97	995.87	719.01	566.15	557.36
GiantSalamander_f15p60_520_transcript14476_g1	PREDICTED: up-regulated during skeletal muscle growth protein 5 [Oryzias latipes]	449.57	466.33	382.29	482.61	659.55	573.99	1354.26	537.48	388.85	1653.7	1235.57	1364.56	457.86	426.54	605.89	169.87	515.46	386.88	492.55	588.9	516.03	511.67	442.76	688.36	702.02	719.64	672.11	887.31	913.32	729.37	647.23	653.8	833.7	435.43	883.62	593.47	640.04	688.25	811.09	987.03	652.31
GiantSalamander_f4p49_2910_transcript4473_g1	putative RNA-directed DNA polymerase from transposon BS [Exaiptasia pallida]	0.06	0.04	0.13	0.3	0.18	0.16	0.22	0.16	0.14	0.15	0.01	0	0.04	0.26	0.01	0.01	0.04	0.01	66.25	19.93	29.5	0.81	646.91	141.05	800.28	858.25	1647.25	886.16	735.59	315.95	0.06	0.04	0.05	0.16	0.06	0.29	0.11	1.85	6.38	7.18	1.93
GiantSalamander_f78p60_1818_transcript10691_g1	thyroid hormone down-regulated protein (gene 17) precursor [Xenopus laevis]	3.78	0.67	0.58	0.48	0.41	0.39	0.16	0.69	0.16	0.04	0	0.01	0.05	0.08	0.01	0.05	0.2	0.24	1193.29	1394.94	843.7	3.27	46.72	120.35	1046.88	1644.32	816.65	32.16	24.08	386.71	352.58	248.22	157.92	18.58	57.06	64.41	90.84	584.05	11.83	0.14	17.94
GiantSalamander_f3p18_2678_transcript5908_g1	troponin C, slow skeletal and cardiac muscles [Xenopus tropicalis]	0.23	0.33	0.15	0.52	1.19	0.66	1643.2	448.49	327.56	1386.19	817.62	1068.41	0.03	0.03	0.02	0.11	0.03	0.12	14.72	0.23	25.63	173.33	4.24	58.3	172.12	152.46	133.61	177.38	208.94	217.96	2.34	6.89	5.19	7.78	2.49	21.24	0.15	0.16	0.01	0.05	0.21
GiantSalamander_f4p35_5614_transcript15404_g1	chymotrypsin like elastase family member 1 precursor [Xenopus tropicalis]	2.52	0.09	0.21	0.36	0.19	0.03	0.07	0.02	0.04	0.07	0.07	0.09	0.04	0.03	0.01	0.06	0.18	0.06	1369.68	15.01	202.28	124.27	1.7	9.44	664.21	6.78	260.31	49.04	0.38	3.84	1636.21	8.23	504.67	11.01	25.76	584.28	9.03	286.4	126.75	0.73	6.42
GiantSalamander_f2p60_431_transcript30852_g3	.	0	0	0	0	7.63	0.19	0.13	5.77	0	0	1.88	0	0	0	0	0	0.25	1.51	38.75	37.93	40.14	48.09	544.69	30.04	2.92	4.98	0.13	3.74	15.98	4.46	0.16	6.82	0.74	12.06	8.73	326.68	205.68	76.37	122.3	509.1	447.19
GiantSalamander_f10p60_363_transcript30992_g1	PREDICTED: NADH dehydrogenase [ubiquinone] 1 beta subcomplex subunit 1 [Pelodiscus sinensis]	420.46	452.81	427.81	461.3	668.56	541.85	757.03	621.69	509.1	1626.61	1483.66	1146.25	187.82	214.24	400.98	473.36	325.53	239.12	252.36	325.77	329.4	375.84	547.66	430.24	345.2	406.48	401.81	507.63	612.4	449.82	335.97	346.67	555.68	486.69	908.94	286.34	342.17	439.5	515.38	814.22	541.61
GiantSalamander_f15p60_3208_transcript19174_g1	Keratin, type II cytoskeletal 75, partial [Gavia stellata]	0	0	0	0	0	0.4	0	0	0.33	0.16	0	0	0	0.3	0	0	0	0	92.74	102.44	166.28	209.72	0	368.98	674.18	274.96	535.43	1586.67	1625.3	491.88	0	0.1	0	0	0	299.62	23.19	178.29	924.53	11.83	0
GiantSalamander_f4p60_1827_transcript10710_g1	PREDICTED: four and a half LIM domains protein 2 isoform X2 [Alligator sinensis]	12.26	12.61	10.57	16.1	18.12	12.31	1280.57	771.25	485.27	1622.34	1080.57	1423.55	0.96	1.19	1.3	0.69	1.57	0.59	9.03	9.75	5.57	11.62	7.98	8.4	7.07	5.77	4.77	7.23	9.07	5.63	2.63	3.21	3.63	3.66	4.67	9.66	9.32	7.87	8.37	11.8	9.83
GiantSalamander_f4p60_938_transcript29560_g1	PREDICTED: sarcolipin [Pelodiscus sinensis]	1.44	0.38	0.21	0.54	5.56	0.19	8.99	0.71	0.58	0.83	2.7	0.37	0.6	0	0.1	0.96	0.32	18.15	26.27	0.06	24.83	866.04	19.32	95.68	233.22	295.09	167.22	433.33	392.41	488.95	2.04	5.94	4.75	14.46	3.38	18.34	0.51	0.64	0	0.18	1.97
GiantSalamander_f3p16_2998_transcript20662_g1	PREDICTED: keratin, type II cytoskeletal 5-like [Gavia stellata]	0.45	0	0	0	3.51	0	0	0	0	0	0	0.05	0	0	0.03	0	0	0.25	1.53	2.23	1.14	1.29	1617.93	10.04	2.95	1.41	3.28	7.49	5.91	2.67	0.23	0	0.31	9.02	2.35	2.18	1.48	4.71	15.56	30.83	1049.83
GiantSalamander_f2p46_2932_transcript20546_g1	cytokeratin type II [Notophthalmus viridescens]	0	0.15	0	0.62	0	0.29	0.11	0.5	0.04	0	0	0.01	0	0.14	0	0	0.06	0	6.07	1.54	0.56	0.13	2.99	101.7	105.81	1602.8	1526.86	1374.46	1394.03	1201.78	0.13	0	0.03	0	0	0.05	0	0.13	0.08	0	1.36
GiantSalamander_f2p60_1099_transcript13205_g2	RecName: Full=Peroxiredoxin; AltName: Full=Animal blastomere protein, 25 kDa; Short=ABP-25; AltName: Full=Thioredoxin peroxidase; AltName: Full=Thioredoxin-dependent peroxide reductase	385.63	490.5	387.71	428	570.21	492.68	66.59	41.56	34.68	54.14	51.09	55.02	50.12	17.82	32.73	14.48	15.82	16.35	754.04	884.32	927.57	312.22	946.38	867.88	824.03	813.18	965.64	1108.3	903.48	718.46	708.99	736.55	1134.45	581.27	892.79	858.99	838.97	1120.02	934.89	1223.08	1108.22
GiantSalamander_f315p60_2743_transcript4980_g1	PREDICTED: plasminogen [Xenopus tropicalis]	0	0.08	0	0.02	0.03	0.03	0.12	0.25	0.58	0	1.21	0	783.9	1596.33	645.9	127.2	1307.87	1269.42	0.1	0.21	0	0	0.03	0.01	0	0.04	0.25	0.01	0.01	0	0.16	0.13	0.22	0.16	0.21	0	0.09	0	0	0.28	0.43
GiantSalamander_f2p41_1039_transcript29307_g1	PREDICTED: stathmin-3 isoform X1 [Ornithorhynchus anatinus]	1171.13	1210.53	1255.98	1477.59	1190.93	1573.78	16.59	17.95	3.6	8.05	3.39	2.43	1.84	1.16	3.07	3.99	0.28	0.56	2.7	1.21	10.02	27.47	3.65	4.96	3.31	3.03	2.03	1.81	1.45	1.18	3.69	2.32	3.34	2.28	3.09	4.94	2.17	2.67	2.68	1.22	4.29
GiantSalamander_f5p60_868_transcript29715_g1	WAP four-disulfide core domain protein 2 [Melipona quadrifasciata]	0	0	0.05	0.18	0.5	0	0.02	0	0.29	0.08	1.18	0.11	0.05	0.08	0	0	0.15	0	117.19	25.96	35.01	27.31	93.33	124.62	81.45	98.33	192.28	426.24	349.17	293.03	0.16	0.05	0.33	0.42	0	27.83	14.01	149.14	180.29	279	105.9
GiantSalamander_f25p60_807_transcript13745_g1	.	140.1	98.25	125.23	134.24	252.83	114.9	621.18	33.21	149.4	79.74	179.49	64.53	53.78	42.96	42.48	21.72	179.35	15.21	76.07	149.82	67.01	114.44	131.63	74.82	72.28	61.38	61.37	72.37	111.82	62.79	299.57	258.52	376.16	124.47	209.74	45.35	68.63	37.31	69.1	158.06	78.43
GiantSalamander_f9p60_2916_transcript4467_g1	PREDICTED: vitronectin [Gekko japonicus]	1.77	3.3	2.31	2.17	2.28	1.11	0.93	0.53	0.32	0.44	1.23	0.35	1548.25	1538	1474.96	937.42	715.85	1504.09	0.19	0.19	0.19	0.12	0.06	0.02	0.06	0.07	0.23	0.06	0.1	0.04	0.61	0.78	0.2	0.2	0.31	0.06	0	0.04	0	0.35	0.49
GiantSalamander_f4p48_386_transcript14827_g1	6.8 kDa mitochondrial proteolipid-like [Scleropages formosus]	641.88	660.64	563.43	547.56	739.02	621.01	1145.3	624.09	545.71	1546.22	1471.66	1194.56	491.97	437.92	608	508.18	539.92	411.3	406.46	443.42	418.82	563.8	447.15	546.42	570.11	618.93	540.35	831.81	843.3	639.45	661.21	616.26	942.5	500.43	1027.18	436.44	472.1	503.47	669.9	925.44	521.63
GiantSalamander_f17p60_966_transcript29546_g1	FKBP1B protein, partial [Xenopus laevis]	679.86	478.18	512.2	406.27	290.07	1280.61	230.3	105.41	73.55	258.67	185.36	237.96	58.28	49.89	56	24.16	91.69	57.77	41.46	30.53	70.54	197.91	29.18	59.58	99.75	114.46	83.63	120.62	115.38	122.42	29.78	28.5	40.54	18.04	25.52	31.47	28.05	32.91	22.94	35.62	33.44
GiantSalamander_f145p60_3149_transcript2939_g1	PREDICTED: keratin, type II cytoskeletal [Xenopus tropicalis]	32.32	39.95	26.79	44.96	6.64	9.67	70.99	14.1	5.69	29.37	10.35	12.73	7.43	11.24	27.25	8.84	8.29	15.82	91.36	81.83	205.3	64.54	112.45	63.22	37.2	45.95	43.75	26.42	19.1	23.54	860.86	1266.79	1429.1	876.4	1108.88	281.63	174.41	194.45	202.69	98.51	248.85
GiantSalamander_f2p60_3134_transcript3252_g1	Inter-alpha-trypsin inhibitor heavy chain H2, partial [Balearica regulorum gibbericeps]	0.09	0.05	0.04	0	0.21	0.16	0.03	0	0	0.07	0	0.02	1.65	3.18	1513.31	331.99	5.74	361.23	0	0	0	0.25	0.03	0.02	0.01	0.03	0	0.02	0.02	0.02	0.02	0.04	0.03	0.15	0.27	0	0.03	0.02	0	0	0
GiantSalamander_f24p60_1759_transcript27159_g1	ATP synthase subunit beta, mitochondrial [Xenopus tropicalis]	902.85	1046.29	1014.2	977.4	738.92	953.01	1091.83	657.47	531.65	1508.16	1335.05	1115.33	292.37	265.97	449.92	618.49	229.3	379.36	543.77	508.54	508.04	508.61	649.44	831.1	556.13	552.76	532.45	432.11	521.33	496.03	701.69	774.68	665.7	493.68	729.6	687.28	457.9	505.36	699.29	542.63	850.53
GiantSalamander_f11p60_2738_transcript5713_g1	envelope protein pan-Mars-Env2 [Didelphis virginiana]	20.88	26.02	28	4.04	8.48	5.38	268.28	59.6	1505.59	86.5	308.99	204.23	2.09	6.47	6.09	4.05	1.07	2.75	277.15	88.21	293.45	43.61	145.92	18.49	119.1	47.52	63.98	35.18	26.91	11.79	105.47	23.45	132.59	82.89	45.93	189.81	46.53	129.62	119.62	57.6	15.55
GiantSalamander_f10p60_3548_transcript17720_g1	fibrinogen alpha chain precursor [Xenopus laevis]	0	0.03	0	0.03	0	0	0.01	0	0.45	0	0.84	0.03	1007.44	1234.19	513.08	42.34	824.59	1502.66	0.2	0.2	0	0	0	0.07	0	0.03	0	0	0	0	0	0	0	0	0.14	0	0	0	0	0.29	0.19
GiantSalamander_f2p17_2039_transcript9836_g1	unnamed protein product [Mus musculus]	764.91	840.32	813	1003.16	1502.06	874.12	0.13	0.16	0	0	0.22	0.2	0.29	0.15	0.64	0.02	0	0.25	0.5	0.16	6.9	44.51	0.79	4.89	0.12	0.16	0.2	0.29	0.12	0.08	0.02	0.05	0.23	0.2	0.13	0.18	0.38	0.22	0.17	0.3	0.97
GiantSalamander_f30p60_1337_transcript28603_g1	malate dehydrogenase 2 [Xenopus laevis]	468.38	492.54	457.16	382.99	360.04	417.01	1080.02	685.03	411.84	1499.7	1361.92	1157.18	288.47	274.83	496.17	365.66	257.79	404.48	295.84	306.79	313.21	424.51	320.2	486.48	409.79	409.95	385.72	339.79	438.13	437.33	444.48	451.24	431.95	292.5	517.26	369.02	283.89	259.69	379.47	316.83	478.84
GiantSalamander_f7p60_508_transcript14538_g1	PREDICTED: cytochrome c oxidase subunit 7A1, mitochondrial-like [Xenopus tropicalis]	0.99	0.6	0.92	1.33	5.28	2.57	485.21	582.49	410.82	1493.44	1255.06	1016.73	236.92	235.21	441.53	699.6	202.46	263.65	12.25	0.64	28.93	253.76	16.08	73.2	119.27	133.43	87.32	218.45	224.96	236.21	0.8	5.09	7.45	17.76	4.82	12.21	0.09	0.84	0.84	1.11	1.14
GiantSalamander_f23p60_1360_transcript28399_g1	epithelial cell adhesion molecule [Xenopus laevis]	4.21	6.2	6.73	4.14	11.14	5.35	2.41	0.43	0.17	1.26	1.01	0.63	16.38	8.55	23.94	1.11	7.82	9.96	948.1	676.38	1490	202.69	282.86	328.67	935.44	920.86	1060.02	907.79	782.18	892.7	857.3	828.14	1028.44	333.64	676.25	700.88	785	1086.15	597.36	616.78	453.39
GiantSalamander_f2p60_2356_transcript24164_g3	transposase [Acipenser fulvescens]	59.83	72.39	66.76	79.74	37.66	69.33	17.52	40.59	2.39	9.11	7.73	8.52	5.99	6.75	3.83	2.5	3.43	6.51	777.1	990.68	840.77	319.14	1489.44	231.53	15.57	27.88	8.93	13.94	22.6	14.64	49.75	70.43	26.03	27.74	22.12	1043.96	831.58	409.72	228.57	189.02	403.62
GiantSalamander_f5p60_219_transcript31311_g1	.	0	37.04	16.45	0	20.69	32.12	185.28	1138.41	1065.45	119.23	637.61	173.01	42.2	16.28	126.48	1484.94	19.44	25.95	45.08	32.97	46.09	223.67	392.21	166.35	133.9	128.82	248.9	303.21	200.49	163.37	22.08	58.99	285.46	636.7	290.86	611.76	188.75	156.45	225.64	510.22	979.88
GiantSalamander_f33p60_2153_transcript9088_g1	PREDICTED: sodium/potassium-transporting ATPase subunit beta-1 [Alligator mississippiensis]	918.83	873.93	939.42	932.91	1480.87	873.39	233.57	152.12	98.42	261.23	227.79	273.23	37.53	32.21	42.82	11.62	24.59	25.46	109.34	108.85	134.45	72.81	47.9	52.1	123.89	125.08	147.1	98.98	70.74	88.75	156.95	171.74	165.23	114.79	197.47	128.77	121.07	155.37	73.2	83.17	86.12
GiantSalamander_f5p60_2787_transcript21753_g1	PREDICTED: uncharacterized protein LOC105948240 [Xenopus tropicalis]	15.18	14.38	16.2	6.84	6.45	5.52	142.72	45.35	1480.4	74.76	186.23	98.9	4.58	3.54	3.28	3.93	1.56	10.5	315.19	41.97	308.67	43.95	114.88	64.93	137.1	37.7	69.02	51.2	31.52	50.45	148.76	22.37	128.89	153.21	135.47	227.79	33.64	170.5	124.95	64.12	156.81
GiantSalamander_f2p40_3249_transcript18918_g1	PREDICTED: keratin, type II cytoskeletal [Xenopus tropicalis]	0.76	0.21	1.26	0.92	0	0.78	6.28	0	0	0.16	0.61	0.04	0.12	0.38	0	0	0	0.28	1137.97	808.22	1065.61	887.61	10.63	342.25	627.6	621.5	656.3	996.54	667.44	899.89	59.66	55.48	30.75	0	1.81	1309.11	1471.47	937.41	586.1	662	22.95
GiantSalamander_f7p60_1553_transcript11782_g1	PREDICTED: ribonuclease pancreatic delta-type isoform X1 [Rattus norvegicus]	1.65	2.82	2.09	1.38	3.14	0.69	49.91	14.4	7.32	18.99	9.58	10.89	418.63	299.85	1426.72	1437.38	332.28	515.68	2.72	3.79	5.56	3.4	1.59	2.66	1.34	2.2	2.1	2.24	0	1.03	1.51	1.63	3.95	5.33	7.29	2.21	0	3.71	3.64	3.19	2.33
GiantSalamander_f4p60_656_transcript14166_g1	.	236.5	277.99	269.37	444.01	656.96	487.3	353.17	153.16	81.44	969.95	648.69	761.56	25.95	29.04	28.79	22.1	45.89	47.7	29.7	34.67	47.02	119.48	62.82	76.63	64.47	77.36	66.61	167.2	182.84	145.27	39.83	49.24	48.83	43.17	96.57	26.4	35.56	39.41	89.89	98.34	60.01
GiantSalamander_f244p60_2131_transcript8874_g1	PREDICTED: calmodulin isoform X1 [Xenopus tropicalis]	1160.95	1394.3	1382.4	1448.12	939.8	1191.25	131.18	59.64	39.86	134.64	119.21	111.9	81.11	76.74	95.81	171.64	89.48	91.03	318.19	289.03	290.37	176.91	199.19	242.38	236.14	231.02	224.91	197.47	194.09	202.21	318.25	343.79	300.99	207.75	332.92	362.89	290.71	284.8	244.59	235	303.81
GiantSalamander_f93p60_991_transcript13181_g1	PREDICTED: myosin regulatory light chain 2, smooth muscle minor isoform [Lepisosteus oculatus]	418.58	409.81	386.6	353.08	240.31	382.32	1267.65	247.85	156.29	840.52	476.53	654.23	316.87	323.6	216.02	92.82	325.76	153.59	1194.66	1018.4	1447.41	689.61	261.82	521.67	1271.98	1186.7	1268.34	1229.53	1324.91	1025.05	1144.27	1152.6	991.66	226.59	309.76	1184.42	1302.87	1437.77	912.72	916.94	407.86
GiantSalamander_f2p18_570_transcript14321_g1	PREDICTED: ATP synthase subunit g, mitochondrial [Latimeria chalumnae]	471.41	451.32	436.64	441.33	451.29	499.16	1082.86	834.57	630.57	1441.2	1418	1119.2	314.08	311.5	621.19	771.86	287.51	527.23	368.87	430.04	382.02	341.93	552.07	657.71	465.51	447.66	422.09	285.19	353.22	385.02	415.08	479.13	468.83	501.03	644.73	423.38	398.07	371.36	524.26	315.5	859.05
GiantSalamander_f2p15_2440_transcript23567_g2	PREDICTED: chymotrypsin-like elastase family member 1 isoform X1 [Xenopus tropicalis]	0.14	0.38	0.14	0.12	1.01	0.34	0.06	0.3	0.16	0	0.13	0.1	0.02	0.06	0.04	0.05	0.01	0.3	70.26	1439.27	68.76	69.66	62.11	586.53	23.84	709.02	104.58	21.94	34.1	395.5	110.22	637.39	153.04	309.96	801.37	25.75	990.31	112.01	68.05	37.41	292.13
GiantSalamander_f9p60_645_transcript14146_g1	ATP synthase subunit d, mitochondrial [Danio rerio]	293.01	287.1	267.45	245.44	324.15	321.82	832.8	544.02	383.65	1436.32	1040.24	976.28	198.56	189.73	358.81	292.18	192.6	220.89	248.85	287.2	328.27	281.84	350	471.17	372.58	390	391.78	438.95	424.62	440.79	420.08	428.05	614.11	388	718.63	349.07	259.62	391.22	458.51	407.82	406.89
GiantSalamander_f9p60_3567_transcript17759_g1	PREDICTED: phospholipase A2 inhibitor and Ly6/PLAUR domain-containing protein [Microtus ochrogaster]	810.03	1030.57	1052.06	1436.31	1066.49	836.19	0.14	0.14	0.04	0.02	0.3	0.15	0.17	0.21	0.19	0.01	0.07	0.2	0.71	0.26	7.79	62.56	0.83	6.87	0.97	0.89	0.8	1.69	4.22	1.23	0.04	0.11	0.2	0.37	0.2	1.77	1.3	0.77	1.42	1.6	1.51
GiantSalamander_f7p60_1231_transcript28838_g1	uncharacterized protein LOC734681 [Xenopus laevis]	18.62	13.45	10.52	5.49	4.29	2.86	93.65	25.02	14.58	62.93	42.16	21.65	133.46	50.44	82.79	73.18	95.89	56.3	462.53	417.51	620.08	188.02	33.85	107.86	390.43	412.67	306.2	57.57	71	108.71	1425.4	1153.59	1403.41	406.49	898.12	271.85	476.22	518.82	56.86	71.48	122.41
GiantSalamander_f11p60_3068_transcript3542_g1	Keratin, type II cytoskeletal 75, partial [Cathartes aura]	0	0	0.8	0.16	6.17	0.62	0	0.24	0	0.29	0	0	0.2	0.12	0	0	0	0	1	362.07	464.95	148.92	224.96	718.66	1.53	443.83	446.23	1049.29	876.1	587.24	0.1	7.6	12.98	17.51	4.39	2.03	322.09	630.12	1078.28	1424.94	227.32
GiantSalamander_f19p60_477_transcript30728_g1	cytochrome c oxidase subunit VIIb [Xenopus laevis]	247.69	299.79	263.21	241.72	344.92	347.02	746.17	377.34	252.45	1423.1	908.43	884.64	204.45	202.36	293.29	87.13	256.71	180.36	179.87	234.18	248.7	220.05	173.59	314.16	281.59	349.43	289.92	430.47	501.63	364.02	329.45	330.45	460.57	171.97	392.33	316.22	242.37	293.86	302.39	385.47	209.03
GiantSalamander_f38p60_6038_transcript15315_g1	PREDICTED: myosin-4 [Xenopus tropicalis]	0.66	0.38	0.14	0.34	4.73	0.12	6.08	0.22	0.06	0.25	0.1	0.24	0.33	0.09	0.08	2.52	0.05	21.1	95.88	0.1	132.73	1142.55	11.72	211.11	387.71	466.18	336.99	425	449.5	1190.62	0.19	0.28	0.85	1.02	0.08	8.13	0.38	0.61	0.12	0.22	2.1
GiantSalamander_f4p60_1214_transcript12763_g1	troponin T type 3 (skeletal, fast), partial [Scaphiopus couchii]	0.79	0.21	0.31	1.2	10.83	0	1.7	0	0.3	0.68	0.05	0	0	0.07	0	4.81	0.36	2.4	129.9	1.32	436.39	871.62	206.89	1420.33	253.14	273.72	215.02	271.24	443.71	424.24	11.34	34.16	17.7	85.88	33.65	28.96	0	0	0.11	0	4.34
GiantSalamander_f11p60_2009_transcript26005_g1	serum albumin precursor, partial [Plethodon wehrlei]	0.11	0	0	0	0	0	0.34	0	0	0	0.76	0	165.5	213.81	1405.23	405.46	374.87	602.24	0	0	0	0.13	0.65	0	0	0.06	0	0	0	0	0	0	0	0	0	0	0	0	0	0	0
GiantSalamander_f5p60_768_transcript13889_g1	.	0	0.08	0	0.14	0.12	0.3	0.09	0.59	0.24	0	0.19	0.08	0.12	0.25	0.03	0	0	0.62	295.57	433.81	679.32	80.06	182.94	236.4	395.11	810.3	500.59	308.23	221.36	155.85	1.18	4.29	12.31	0.79	0.5	129.95	195.32	531.61	1404.06	227.61	191.82
GiantSalamander_f2p34_1585_transcript27761_g1	PREDICTED: uromodulin-like [Xenopus tropicalis]	0.39	0.32	0.41	0.15	0.99	0.39	0.08	0.67	0.53	0	0	0	0.05	0.27	0.07	0.39	0.03	0.1	447.61	1001	150.07	148.69	5.13	317.39	424.4	618.99	301.66	47.78	1.1	370.37	340.69	335.04	254.6	12.63	159.45	1396.85	803.05	226.42	511.79	0.35	195.26
GiantSalamander_f19p60_784_transcript13855_g1	PREDICTED: matrix Gla protein [Xenopus tropicalis]	1.14	1.67	1.14	1.51	3.91	1.44	106.89	16.78	12.96	61.79	214.14	39.27	5.41	5	15.74	2.2	4.79	5.21	1086.51	1330.24	1393.58	320.02	418.75	783.04	190.35	181.35	232.62	80.46	196.86	104.98	576.37	602.13	457.61	336.81	219.45	156.66	204.31	164.71	59.54	61.2	73.37
GiantSalamander_f17p60_2445_transcript23702_g1	SPARC precursor [Xenopus tropicalis]	285.1	322.5	328.29	300.23	301.07	198.89	581.22	267.17	166.44	390.43	375.39	326.93	81.71	79.36	104.07	64.39	36.82	57.03	1073.93	790.56	860.84	1115.39	500.99	987.3	881.93	817.45	564.15	534.1	859.08	652.91	257.04	374.51	314.47	313.16	210.25	1392.32	1340.72	900.57	696.11	784.53	686.86
GiantSalamander_f3p41_4292_transcript731_g1	PREDICTED: sarcoplasmic/endoplasmic reticulum calcium ATPase 1 isoform X1 [Latimeria chalumnae]	1.13	0.32	0.38	0.49	3.76	0.12	5.96	0.63	0.43	0.88	0.69	0.54	0.23	0.07	0.06	0.47	0.1	18.48	48.57	0.13	66.22	1344.1	13.93	203.66	113.81	144.29	108.76	193.73	329.94	320.85	1.39	3.56	2.8	5.98	1.83	10.14	0.35	0.28	0	0.08	1.07
GiantSalamander_f49p60_1161_transcript12837_g1	.	820.8	809.21	662.45	1021.07	599.16	1286.01	409.62	98.05	72.74	558.82	313.36	460.31	155.19	136.11	131.87	53.28	184.35	144.63	973.47	967.85	1028.04	411.62	252.16	483.39	891.81	877.23	913.38	1007.26	878.59	899.41	1012.37	1014.97	1364.6	359.87	709.75	1082.08	1046.27	1374.89	630.83	723.75	461.22
GiantSalamander_f8p60_734_transcript14001_g1	PREDICTED: cystatin-like [Chrysemys picta bellii]	870.63	726.89	589.78	652.4	795.18	657.42	644.8	213.69	145.04	731.33	487.74	565.9	805.63	1020.33	1371.68	407.71	973.78	890.7	99.63	122.84	161	117.35	30.86	58.68	147.1	179.13	146.6	122.09	144.54	116.28	107.81	124.98	164.74	52.42	73.88	82.94	127.62	123.72	34.53	55.99	38.78
GiantSalamander_f20p60_3048_transcript3804_g1	PREDICTED: fructose-bisphosphate aldolase C [Cuculus canorus]	866.72	1001.2	1023.37	1369.47	1353.16	1028.75	56.36	46.09	31	63.07	61.06	40.79	4.74	3.4	3.51	15.81	3.06	3.54	31.13	31.04	11.69	61.15	11.14	46.06	48.61	56.97	22.43	19.04	15.7	48.54	16.51	15.23	8.96	16.39	23.18	63.55	46.9	18.22	24.91	6.99	49.38
GiantSalamander_f2p25_1535_transcript11790_g1	PREDICTED: tubulin alpha-1A chain [Clupea harengus]	1056.96	1150.54	1171.14	703.5	546.1	770.2	251.09	300.64	219.54	196.75	267.66	181.59	79.84	62.57	146.52	190.47	15.29	57.35	260.33	206.66	296.13	95.24	495.03	257.1	195.74	189.82	230.93	75.18	58.9	69.91	1282.16	1368.81	844.96	780.24	784.55	280.45	194.4	269.78	232.94	109.38	526.04
GiantSalamander_f2p18_5420_transcript15461_g1	PREDICTED: uncharacterized protein LOC100490320 [Xenopus tropicalis]	1.2	1.85	1.59	0.81	1.69	0.88	1.93	0.81	0.29	1.28	0.6	1.62	0.2	0.46	0.58	0.23	0.12	0.17	188.77	147.56	706.29	17.18	27.86	33.4	52.6	159.64	187.9	40.09	19.5	46.12	982.64	1360.47	1325.67	365.71	397.26	51.69	82.55	550.34	53.25	64.72	43.89
GiantSalamander_f6p60_843_transcript29562_g1	ferritin heavy chain [Andrias davidianus]	26.04	16.89	19.99	16.67	36.54	24.68	44.98	4.71	9.5	5.32	27.8	6.46	44.43	2.18	4.29	5.79	15.08	3.29	206.34	196.01	196.67	77.33	233.4	285.03	151.35	106.21	146.41	79.45	72.13	86.81	384.85	362.04	550.34	338.33	391.31	172.21	206.25	187.86	223.74	160.48	490.14
GiantSalamander_f18p60_959_transcript29515_g1	ATP synthase F(0) complex subunit B1, mitochondrial [Xenopus tropicalis]	358.96	353.01	325.38	322.72	330.64	416.35	979.87	322.7	265.01	1358.65	1068.52	1111.94	252.82	251.73	338.57	265.74	302.02	276.55	314.31	332.13	338.81	340.45	333.81	449.07	456.74	465.71	445.99	598.4	610.15	518.14	427.23	422.91	496.51	254.28	493.59	363.84	359.21	427.44	458.58	666.45	444.84
GiantSalamander_f23p60_841_transcript13639_g1	PREDICTED: retinoic acid receptor responder protein 2-like [Xenopus tropicalis]	4.23	7.74	6.96	13.46	29.5	3.8	0.3	0	0.09	0	0.78	0	441.11	511.25	560.93	288.07	662.89	652.81	0.09	0.08	0.25	0.38	0.28	0.11	0	0	0.06	0.16	0.09	0.09	0	0	0	0.03	0.45	0.19	0.32	0.13	0.13	0.4	0.75
GiantSalamander_f4p57_1731_transcript27272_g1	Keratin, type I cytoskeletal 42, partial [Charadrius vociferus]	0.35	0.07	0.61	0.33	1.27	0.18	0.08	0.21	0.29	0.04	0.24	0	0	0	0	0	0.05	0.19	166.86	59.24	173.65	127.69	280.76	166.62	516.29	164.52	509.6	1346.06	224.94	166.57	0.35	0.62	1.7	11.27	2.73	269.49	29.21	416.11	444.53	223.97	273.43
GiantSalamander_f11p60_1638_transcript27563_g1	PREDICTED: phospholipase A2 inhibitor subunit gamma B-like [Xenopus tropicalis]	120.35	145.96	106.61	112.92	126.5	62.28	1344.65	615.15	400.33	1340.04	1034.57	1043.7	67.97	76.39	87.17	71.27	43	45.39	159.71	119.15	123.91	195.55	297.52	148.05	129.46	109.28	93.53	114.05	147	109.61	68.91	81.63	49.83	58.81	49.94	264.7	157.13	116.79	179.98	195.63	158.61
GiantSalamander_f75p60_3602_transcript1707_g1	PREDICTED: keratin, type I cytoskeletal 12 [Alligator mississippiensis]	0.46	0.14	0.51	0.16	0.08	0.12	0	0.21	0.11	0.11	0.15	0.04	0.05	0	0	0	0.18	0.12	1258.18	740.57	1332.76	16.8	61.64	145.98	294.94	449.42	387.81	45.16	29.47	312.1	121.12	119.82	100.91	29.74	60.61	323.71	179.81	1012.09	37.37	20.84	28.1
GiantSalamander_f11p60_471_transcript30752_g1	.	939.57	977.69	927.02	760.03	980.69	1020.36	659.06	412.69	351.15	446.51	449.1	365.85	330.22	317.51	519.36	158.57	360.71	256.56	625.16	869.3	692.71	365.37	504.5	771.54	686.97	683.55	591.84	556.54	626.05	478.2	899.81	884.98	1331.26	674.74	1123.95	877.24	854.09	871.4	811.34	994.92	779.11
GiantSalamander_f3p48_1713_transcript27312_g1	ribosomal protein S27-3 [Salmo salar]	344.34	313.76	307.85	321.99	481.78	373.55	716.96	468.71	440.03	748.79	731.82	682.96	256.81	224.87	463.68	480.39	371.84	354.98	469.75	598.18	536.84	615	1048.41	1067.21	510.04	463.31	458.69	584.18	592.41	579.13	389.63	382.29	629.36	625.04	841.24	649.2	553.86	643.44	988.44	1149.32	1329.56
GiantSalamander_f3p60_477_transcript30733_g1	.	0	0	0	0.18	0.14	0.29	0	0.19	0.4	0.11	0	0	0	0.21	0	0	0	0.09	16.42	2.41	1.1	0.21	420.7	100.85	861.38	624.2	1323.25	456.29	499.2	210.07	0.12	0	0	0	0	0	0	0.11	0.1	0	0.22
GiantSalamander_f11p60_1639_transcript11384_g1	Heterogeneous nuclear ribonucleoprotein A3, partial [Ophiophagus hannah]	1096.04	1094.31	1059.71	947.28	600.01	1024.06	661.02	244.18	193.65	645.79	502.33	498.07	328.8	287.18	512.68	489.39	268.69	340.92	1024.2	871.62	1243.44	692.77	804.62	930.06	870.7	807.95	990.1	818.82	743.35	837.5	1019.59	1006.7	1147.62	692.85	1065.34	874.38	701.23	1021.17	949.24	1124.29	1321.16
GiantSalamander_f9p60_2592_transcript22698_g1	PREDICTED: polyubiquitin-like [Monodelphis domestica]	1234.47	1301.69	1238.89	1021.89	622.94	1042.99	729.22	224.31	155.24	833.79	627.77	613.52	462.67	462.12	588.85	309.62	471.17	433.59	776.39	758.16	844.65	505.79	294	495.26	763.76	796.17	796.3	519.57	496.08	701.52	1313.58	1319.24	1220.76	354.14	708.9	749.67	859.37	857.92	526.45	501.3	484.46
GiantSalamander_f20p60_469_transcript30708_g1	ubiquinol-cytochrome c reductase complex [Xenopus tropicalis]	248.78	242.44	226.82	242.13	413.41	324.29	773.76	782.57	628.09	1318.97	1256.49	1016.69	180.02	174.49	372.82	243.11	170.16	261.46	179.71	221.28	242.55	173.99	340.78	340.71	249.71	262.54	253.68	275.74	249.33	273.83	202.75	207.07	330.64	281.55	465.22	231.15	175.82	286.92	289.42	346.98	384.81
GiantSalamander_f20p60_2165_transcript25226_g1	synaptosomal-associated protein, 25 kDa [Cynops pyrrhogaster]	786.29	848.33	957.49	1035.07	1316.2	873.65	0.05	0.22	0	0.02	0.04	0.1	0.06	0.08	0.02	0	0.01	0.03	0.34	0.08	5.71	30.81	0.7	2.36	0.13	0.11	0.16	0.25	0.01	0.05	0	0	0.12	0.12	0	0.23	0.41	0.15	0.08	0.19	0.89
GiantSalamander_f8p60_2526_transcript6514_g1	PREDICTED: probable ATP-dependent RNA helicase DDX5 [Tupaia chinensis]	1240.97	1218.91	1312.35	1132.78	749.31	1088.57	444.16	228.82	123.28	411.99	338.46	298.94	209.46	181.12	289.01	115.75	257.64	165.22	726.77	668.07	614.78	401.45	419.57	718.05	633.35	519.94	635.51	569.04	493.38	530.78	745.94	696.83	681.47	361.5	417.12	748.26	634.3	662	771.29	679.51	531.7
GiantSalamander_f4p60_1932_transcript26395_g1	serotransferrin-B precursor [Xenopus laevis]	2.67	0.68	3.25	0.22	0.65	0.24	0	0	0	0	0.26	0.06	752.94	1311.46	129.12	7.25	287.53	255.68	0	0.1	0.93	0	0	0.07	0	0.12	0	0	0	0	0	0	0	0.09	0	0.35	0.22	0.63	0.42	0.4	0.08
GiantSalamander_f3p43_2695_transcript22108_g1	LOC447981 protein, partial [Xenopus tropicalis]	450.74	480.84	434.25	404.69	511.08	505.52	792.49	298.51	273.09	584.34	497.53	538.73	323.67	340.73	304.11	246.03	398.88	370.25	614.16	696.98	662.28	766.96	662.43	1309.74	598.21	589.07	576.72	640.76	677.92	739.4	548.19	545.01	629.2	268.59	364.91	796.86	659.31	757.57	1132.22	1049.74	899.09
GiantSalamander_f3p57_822_transcript29835_g1	cytochrome c oxidase subunit Va [Xenopus laevis]	342.17	386.08	189.72	311.48	250	365.63	965.4	491.83	166.78	1309.1	444.57	951.15	247.99	252.23	208.11	161.76	75.21	227.19	338	403.7	208.36	288.01	177.89	441.47	481.37	539.8	260.76	196.87	203.11	444.93	561.97	586.64	394.13	172.95	588.12	409.68	378.79	241	411.14	160.17	484.44
GiantSalamander_f4p60_709_transcript30152_g2	40S ribosomal protein S9 [Chelonia mydas]	248.39	273.47	260.8	242.48	313.44	304.11	527.43	394.09	349.41	502.44	570.85	411.37	173.54	158.52	314.47	195.91	159.92	229.36	474.67	611.73	479.58	520.86	941.47	1147.2	419.51	419.03	384.12	282.32	365.03	347.13	449.73	449.98	591.71	522.62	669.96	810.88	500.22	510.9	907.48	589	1308.35
GiantSalamander_f19p60_1284_transcript12656_g1	60S ribosomal protein L4 [Fukomys damarensis]	0.33	0.45	698.95	0.58	824.89	0.65	0.37	0.44	321.26	0.56	840.13	0.72	0.19	0.16	496.27	0.45	471.61	0.31	0.19	0.26	793.44	0.4	1161.7	0.25	0.2	0.23	684.31	664.23	728.8	0.07	0.28	0.17	827.82	643.75	0.76	0.3	0.26	823.67	0.4	1192.18	0.48
GiantSalamander_f8p60_2020_transcript9697_g1	serum albumin precursor, partial [Plethodon wehrlei]	0	0	0	0	0.35	0	0	0.25	0.01	0	0	0.04	50.84	70.2	960.75	7.03	206.77	848.68	0.14	0	0.2	0	0	0	0	0	0.1	0	0	0	0	0	0.14	0	0	0	0	0	0	0.16	0.17
GiantSalamander_f2p60_2527_transcript6596_g1	fibrinogen gamma chain precursor [Xenopus laevis]	0.08	0	0	0	0.02	0.08	0	0	0.15	0	0.26	0	247.69	367.38	959.4	459.91	354.19	738.06	0.97	0.14	0	0.01	0.05	0	0	0	0.1	0	0	0	0	0	0	0.14	0.32	0	0.23	0	0.07	0	1.14
GiantSalamander_f9p60_378_transcript14822_g1	.	0.34	0.5	0.41	1.24	1.98	0.72	0.23	0.46	0.17	0.25	0.21	0	0.33	0.28	0	0	0	1.4	713.39	980.57	934.42	176.46	297.42	683.9	1060.73	1078.41	761.67	379.33	407.53	859.39	510.35	532.98	1086.75	367.89	794.46	525.75	788.14	1280.09	452.26	396.26	800.92
GiantSalamander_f63p60_1185_transcript12934_g1	PREDICTED: calmodulin [Egretta garzetta]	913.46	989.73	864.85	1083.07	1277.98	1025.43	158.34	36.58	18.4	154.68	78.01	124.24	100.97	90.95	93.75	15.17	100.96	61.82	364.81	297.67	389.73	275.79	86.93	146.25	447.08	442.34	559.07	631.73	607.91	392.98	587.15	565.44	565.6	95.84	225.59	305.54	350.18	563.85	284.65	342.17	114.86
GiantSalamander_f4p60_759_transcript30043_g1	.	162.43	115.76	154.62	277.8	693.62	293.63	358.45	846.95	1263.1	944.57	932.54	1271	36.63	45.21	62.7	227.17	48.94	87.28	49.49	98.23	84.46	89.95	217.36	103.7	66.1	101.08	71.18	86.19	108.57	127.38	165	206.88	203.63	691.83	416.27	44.42	78.92	93.26	100.2	141.06	162.35
GiantSalamander_f33p60_1589_transcript11585_g1	PREDICTED: heterogeneous nuclear ribonucleoprotein K isoform X3 [Sturnus vulgaris]	800.24	806.87	808.38	666.1	283.96	698.6	413.11	103.94	78.01	509.56	323.26	430.75	265.42	231.55	250.04	165.55	368.68	240.62	876.6	716.63	1181.63	563.44	384.8	720.8	800.04	828.73	989.89	1101.22	1011.06	995.62	1068.77	1056.58	1269.46	341.61	593.15	857.24	859.99	1203.31	829	1129.32	598.46
GiantSalamander_f3p60_1676_transcript27194_g1	PREDICTED: fibrinogen beta chain [Pelodiscus sinensis]	0	0.11	0.06	0	0.01	0	0.1	0.13	0.4	0	0.02	0	56.6	1264.44	1247.65	198.45	38.79	1195.37	0	0.16	0	0	0.02	0	0	0	0.13	0	0	0.03	0	0	0.03	0.17	0.17	0	0.06	0	0.02	0	0.2
GiantSalamander_f11p60_752_transcript13918_g1	sarcolipin [Gallus gallus]	15.91	0.96	1.36	1.9	17.41	0.66	25.02	0.13	0.56	0.75	2.94	0.37	1.35	0.31	0.17	1.81	0.25	48.9	57.2	0.57	153.6	977.73	35.79	280.5	184.9	311.91	181.47	250.14	245.14	250.44	3.3	14.03	16.31	17.78	5.93	25.92	1.48	0.39	0.11	0.63	0.82
GiantSalamander_f2p47_2631_transcript5957_g1	40S ribosomal protein S2 [Xenopus tropicalis]	303.85	251.94	248.37	188.04	365.94	268.39	594.58	336.55	386.6	491.51	557.64	394.81	244.48	199.82	343.99	371.98	257.36	308.69	578.5	654.64	534.8	398.34	955.81	1258.55	493.16	437	397.72	386.03	432.36	363.69	434.18	371.44	511.38	385.36	449.85	851.25	551.79	568.97	972.32	912.06	1133.34
GiantSalamander_f4p60_629_transcript14186_g1	LOC100145142 protein [Xenopus tropicalis]	107.86	1.81	6.75	6.96	63	1.3	89.29	0.84	0.54	2.64	3.57	0.15	4.81	1.92	0.34	2.46	0.59	179.53	108.47	0	199.86	1258.41	4.34	148.74	417.71	1140.33	393.39	276.97	227.58	567.99	2.14	5.37	12.66	2.74	0.93	112.83	3.52	1.42	0.37	0.48	2.52
GiantSalamander_f9p60_4912_transcript15658_g1	PREDICTED: elongation factor 2 [Ornithorhynchus anatinus]	878.53	1006.45	942.32	1003.84	568.21	876.27	963.03	261.48	154.7	742.62	496.28	465.47	386.49	407.21	407.15	287.92	436.77	577.2	1025.39	943.49	787.15	799.7	582.03	1194.97	743.37	663.27	664.39	434.94	587	498.32	863.21	874.5	577.79	313.53	412.76	1253.31	942.01	696.2	1257.43	622.12	836.57
GiantSalamander_f55p60_1944_transcript10256_g1	PREDICTED: cofilin-1 isoform X2 [Physeter catodon]	1103.34	1135.15	1072.69	1091.73	855.56	1253.12	689.43	204.46	93.01	742.26	468.53	575.29	241.8	218.68	206.95	93.44	223.86	180.77	793.47	713.65	1218.02	379.79	335.79	522.57	673	810.41	848.44	1013.34	853.56	908.05	861.46	953.83	1002.86	280.53	546.95	677.45	729.54	1045.27	775.3	860.38	476.92
GiantSalamander_f43p60_1895_transcript26426_g1	PREDICTED: LOW QUALITY PROTEIN: actin, cytoplasmic 2 [Equus przewalskii]	521.81	668.07	519.56	601.33	483.93	606.35	217.4	398.17	163.3	196.38	182.03	152.94	102.45	85.56	169.05	84.53	111.01	153.04	147.82	165.98	148.41	200.38	401.8	313.95	122.74	127.58	113.71	255.08	264.99	208.91	796.48	804.39	340.91	503.51	963.24	248.62	210.46	136.81	642.3	352.6	544.83
GiantSalamander_f15p60_534_transcript30341_g1	PREDICTED: beta-microseminoprotein E1-like [Callithrix jacchus]	0.11	0	0.12	0	8.43	0.22	0	0	0	0	1.6	0	0.07	0.15	0.07	0	0.07	0.49	74.67	36.08	68.6	215.65	498.07	52.15	2.5	1.51	0	5.68	11.37	3.6	0.09	1.5	0.5	9.27	4.01	746.19	258.89	86.64	225.7	361.39	232.94
GiantSalamander_f2p30_668_transcript14136_g1	PREDICTED: protein S100-A13-like [Cuculus canorus]	19.25	17.74	12.26	8.71	10.58	12.92	54.4	20.11	11.16	28.03	22.06	22.19	26.97	23.19	30.1	53.42	48.57	38.81	817.74	1019.5	327.54	310.6	299.22	574.26	1093.73	984.25	621.73	787.98	708.32	729.3	516.15	474.74	422.02	167.03	365.08	794.73	1243.55	746.42	823.05	868.73	488.62
GiantSalamander_f2p34_2344_transcript24188_g1	serine--pyruvate aminotransferase [Xenopus tropicalis]	0.04	0.01	0	0.04	0.03	0	0.14	0.15	0.26	0.11	0.46	0.02	559.04	621.66	1082.93	1242.94	424	722.02	0.03	0.13	0.08	0.07	0.05	0.01	0	0	0.07	0.01	0.04	0	0	0.05	0	0.14	0.22	0	0.06	0.02	0	0.13	0.17
GiantSalamander_f41p60_1069_transcript29148_g1	PREDICTED: peptidyl-prolyl cis-trans isomerase B [Lepisosteus oculatus]	506.99	488.94	240.64	350.93	234.39	449.83	618.98	376.81	143.15	532.08	284.29	502.14	744.62	678.86	447.9	1233.57	377.99	931.57	826.39	893.4	426.88	553.44	358.75	1042.03	704.32	666.89	313.86	306.92	295.39	732.76	649.1	650.71	445.48	285.65	913.56	1073	989.95	508.78	961.7	527.06	1037.73
GiantSalamander_f5p60_2667_transcript22291_g1	chymotrypsin like elastase family member 1 precursor [Xenopus tropicalis]	0.03	0.38	0.05	0.36	0.14	0.14	0.07	0.36	0.07	0.03	0.06	0.04	0	0.02	0	0	0.01	0.16	36.32	1228.14	67.97	44.98	9.34	131.83	19	1103.83	159.36	20.02	49.11	453.69	41.13	941.64	65.66	21.56	45.38	15.75	1191.81	116.32	30.55	5.74	32.47
GiantSalamander_f2p20_2525_transcript7043_g1	peptidylaminoacyl-L/D-isomerase precursor, partial [Bombina variegata]	0.08	0.11	0.05	0.13	11.54	0.18	0.05	11.46	0.04	0.04	0.59	0.06	0.1	0.14	0.02	0	0.12	0.54	513.67	555.5	441.56	391.46	1221.64	163.59	4.77	8.05	0.04	6.31	15.27	4.15	0.17	12.3	1.26	10.48	6.08	1132.35	726.21	300.5	357.18	566.2	403.54
GiantSalamander_f3p56_505_transcript14483_g1	PREDICTED: 60S ribosomal protein L22-like 1 isoform X2 [Chelonia mydas]	351.33	325.64	271.1	343.94	437.66	443.87	894.86	315.42	252.85	885.45	626.34	736.44	211.41	166.02	204.33	150.69	394.77	272.69	517.56	601.67	633.13	891.46	573.54	822.8	625.74	646.74	578.2	825.09	887.45	756.83	528.48	494.6	871.19	325.09	570.12	559.84	641.45	814.91	952.55	1216.98	741.81
GiantSalamander_f21p60_826_transcript13711_g1	PREDICTED: sarcolipin [Pelodiscus sinensis]	0.19	0.27	0.4	0.39	0.73	0.14	47.9	21.43	17.4	72.29	51.88	72.22	1.43	0.47	10.44	0.94	0.06	4.66	98.24	2.09	134.54	1215.95	24.27	358.55	330.96	340.92	254.88	592.38	437.3	437.94	6.74	20.8	18.7	15.29	10.26	21.89	0.74	1.77	2.63	3.22	1.13
GiantSalamander_f3p60_364_transcript14875_g1	unnamed protein product [Oncorhynchus mykiss]	188.22	144.27	210.64	150.26	2.51	99.44	232.76	0.72	0.27	32.11	2.64	10.89	244.39	193.12	208.82	2.17	235.08	226.12	888.72	606.92	1212.93	415.19	3.78	191.19	829.46	612.84	862.46	531.93	552.67	589.48	825.52	775.28	625.34	1.43	0	492.69	836.72	974.4	355.9	641.98	2.77
GiantSalamander_f12p60_2830_transcript21148_g1	PREDICTED: inter-alpha-trypsin inhibitor heavy chain H3 [Pelodiscus sinensis]	0	0.02	0	0.14	0	0	0	0	0.13	0	0	0	730.21	1207.23	250.69	162.85	26.78	678.91	0	0.05	0.1	0	0.12	0	0.02	0.01	0.13	0	0	0	0	0	0	0.06	0	0.03	0.1	0	0	0.13	0.27
GiantSalamander_f3p27_2604_transcript6446_g1	glul-prov protein, partial [Xenopus tropicalis]	729.96	950.37	1206.36	593.84	303.95	529.77	24.65	2.09	1.54	14.48	4.86	7.7	19.94	22.94	24.54	0.12	23.16	14.97	516.88	598.6	213.09	119.32	16.82	228.85	331.65	358.94	275.81	182.86	127.73	179.95	387.95	449.26	242.67	10.49	32.31	449.31	470.64	266.56	272.21	91.57	50.25
GiantSalamander_f12p60_500_transcript29404_g2	adenylate kinase isoenzyme 1 [Gallus gallus]	150.58	152.74	166.75	96.99	36.19	179.81	17.57	2.69	1.4	11.99	13.93	10.63	8.41	10.89	8.46	2.45	11.94	24.84	62.69	2.67	123.29	1204.53	31.79	375.62	205.62	218.99	146.67	290.31	484.1	369.5	6.32	13.66	5.45	10.89	1.51	20.42	3.21	1.58	4.16	4.21	4.24
GiantSalamander_f5p60_3847_transcript1255_g1	PREDICTED: myosin-binding protein C, fast-type isoform X4 [Gekko japonicus]	1.64	1.45	0.85	1.47	4.93	0.27	6.89	0.89	0.57	3.02	3.25	1.93	0.23	0.12	0.1	0.63	0.17	14.87	59.96	0.26	88.22	946.14	36.05	307.65	145.09	149.57	108.58	170.9	250.73	262.64	1.03	2.68	2.06	5.41	1.02	11.26	0.27	0.15	0.05	0.12	0.92
GiantSalamander_f2p18_2736_transcript22140_g1	.	0.65	0.38	0.34	0.13	5.18	0.32	0.17	22.08	0.07	0.02	0.22	0.05	0.01	0.06	0	0.02	0.17	0.89	323.46	548.99	507.35	202.49	1196.72	174.15	3.35	9.36	0.12	3.93	10.4	4	0.14	14.24	2.46	22.52	10.56	435.34	429.81	232.05	155.68	159.34	310.42
GiantSalamander_f17p60_1402_transcript12270_g1	PREDICTED: amine sulfotransferase-like [Pelodiscus sinensis]	1.57	0.91	0.99	0.26	0.3	0.89	0.5	0.4	0.42	1.03	0.73	0.73	766.24	826.61	708.52	127.28	634.35	436.3	0.29	0.34	0.69	1.6	0.96	0.1	0	0.07	0.12	0.03	0.17	0.15	0.09	0.06	0.12	0.3	0.52	0.13	0.12	0.23	0.12	0.43	0.3
GiantSalamander_f4p60_3081_transcript3600_g1	PREDICTED: keratin, type II cytoskeletal 75 [Felis catus]	0.15	0	0.09	0.49	3.96	0	0.06	0	0.01	0.18	0.37	0.04	0	0	0	0	0.3	0.01	21.62	36.18	35.29	83.1	364.5	96.76	212.1	94.76	177	468.17	328.78	130.91	0	0.48	0.77	6.7	0.77	61.4	36.2	86.49	524.5	1180.49	146.16
GiantSalamander_f6p60_1250_transcript28810_g1	RecName: Full=Troponin C, skeletal muscle	28.91	15.14	17.69	23.51	38.82	13.01	50.67	0.62	0.6	2.48	2.97	0.48	1.5	0.58	0.4	1.76	0.41	104.72	300.5	1.53	477.91	803.67	95.66	1014.37	849.49	1175.98	846.04	592.28	925.52	880.74	23.4	82.88	41.86	106.77	37.47	91.64	2.01	1.43	0.25	0.7	3.74
GiantSalamander_f2p20_3005_transcript20271_g1	PREDICTED: collagen alpha-1(III) chain-like, partial [Tyto alba]	33.26	65.47	33.54	36.31	21.03	15.29	677.29	276.69	180.84	458.43	196.64	369.81	75.74	102.51	97.42	32.14	17.2	66.35	246.46	182.79	206.12	985.8	106.24	356.8	577.46	899.81	380.79	58.86	475.24	703.87	94.23	241.97	140.3	102.07	90.3	854.71	1175.91	478.27	509.74	442.59	369.08
GiantSalamander_f164p60_874_transcript13577_g1	PREDICTED: profilin-1-like [Alligator sinensis]	204.24	211.74	193.21	252.07	240.88	293.62	288.18	80.89	78.34	381.91	278.77	304.28	240.43	169.48	269.1	237.82	285.82	256.54	704.72	748.98	1172.62	387.02	502.06	747.6	521.69	583.65	510.72	602.16	514.13	657.44	475.39	538.81	915.75	387.12	579.11	864.34	882.91	916.74	626.2	778.64	748.09
GiantSalamander_f8p60_511_transcript14505_g1	PREDICTED: cytochrome b-c1 complex subunit 7 [Xenopus tropicalis]	263.63	253.17	217.19	307.06	277.35	344.71	838.08	217.76	111.87	1171.45	707.34	857.88	202.49	191.19	260.09	64.26	176.57	178.72	245.23	232.76	280.63	267.05	142.18	215.07	403.66	398.17	379.66	473.9	468.38	410.79	401.64	365.9	495.79	163.22	411.56	249.65	255.03	353.85	290.35	328.72	183.21
GiantSalamander_f21p60_970_transcript29509_g1	PREDICTED: stathmin isoform X1 [Ochotona princeps]	625.91	618.55	464.15	932.29	818.31	1090.91	254.28	52.82	39.73	624.24	405.84	605.16	124.68	113.25	132.81	68.11	210.33	165.25	516.52	472.22	623.95	305.34	226.65	377.97	485.98	544.06	606.49	849.93	806.76	657.04	413.58	440.84	871.66	227.98	481.92	552.83	601.07	904.58	491.65	859.04	325.38
GiantSalamander_f2p60_849_transcript13694_g1	PREDICTED: neuroendocrine protein 7B2 [Sarcophilus harrisii]	772.15	766.41	686.41	866.02	825.91	1016.38	0.22	0.57	0.27	0	0.23	0.21	0.09	0.09	0.23	0.21	0	0.15	1.66	1.1	4.55	15.66	2.17	3.7	1.29	1.7	1.94	1.86	1.24	1.35	0.07	0.44	0.25	0.53	0.52	1.25	3.53	0.56	1.35	1.43	3.4
GiantSalamander_f2p60_519_transcript30612_g1	PREDICTED: 14-3-3 protein beta/alpha isoform X2 [Lepisosteus oculatus]	997.18	1159.79	942.98	1045.87	123.65	712.47	60.02	4.74	4.31	41.81	12.83	19.53	159.61	210.63	25.73	11.88	207.78	89.33	331.58	154.31	294.25	161.09	14.97	58.1	340.99	335.07	379.29	498.23	616.45	358.78	442.23	393.59	147.94	14.76	7.95	260.98	268.93	266.55	141.07	140.3	10.21
GiantSalamander_f2p19_2085_transcript9406_g1	PREDICTED: kininogen-1 isoform X2 [Pantholops hodgsonii]	0.21	0	0	0.05	0	0.08	0.15	0	0	0	0	0.02	4.39	5.52	330.11	167.39	3.01	4.41	0	0	0.09	0.1	0.1	0	0	0.02	0	0	0.03	0	0.02	0	0.01	0	0.28	0	0.13	0	0	0	0
GiantSalamander_f23p60_1308_transcript12423_g1	malate dehydrogenase, peroxisomal isoform Mdh1x [Rattus norvegicus]	527.96	514.4	515.69	486.6	409.51	469.41	853.32	238.86	172.55	1139.04	622.49	777.81	246.79	229.43	274.93	66.89	190.84	159.43	233.47	232.78	274.03	260.88	127.45	229.25	346.71	340.55	388.55	394.37	376.12	385.56	442.39	410.98	406.43	137.75	222.24	252.97	232.62	324.92	213.33	255.81	192.39
GiantSalamander_f2p15_4270_transcript16256_g1	predicted protein [Nematostella vectensis]	2.41	3.38	4.29	5.83	7.72	2.46	3.98	16.5	16.02	8.8	13.66	3.74	0.53	0.42	1.68	10.35	0.4	1	551.51	741.59	205.25	143.66	64.62	264.23	479.5	547.58	190.37	26.37	31.37	175.53	290.14	455.23	223.18	288.41	451.41	755.27	1136.58	262.21	448.93	1.36	832.08
GiantSalamander_f5p60_774_transcript13901_g1	uncharacterized protein LOC495981 [Xenopus laevis]	62.57	64.28	44.2	36.43	58.24	54.96	296.01	240.45	217.36	670.74	495.11	548	440.36	437.35	867.79	766.42	433.53	516.68	498.93	589.66	343.34	225.52	833.71	749.42	695.41	712.19	858.47	834.61	757.04	615.19	640.84	644.22	807.43	604.85	1094.08	643.24	474.1	696.49	1094.93	1100.3	815.88
GiantSalamander_f3p57_1342_transcript28564_g1	annexin A2 [Bombina maxima]	97.56	104.49	102.68	95.72	47.81	78.01	276.16	50.16	78.55	224.71	203.04	122.34	134.02	118.7	191.89	49.68	185.32	192.55	910.4	683.36	1134.01	510.07	288.42	702.99	875.26	877.11	973	769.64	806.31	884.74	451.75	499.66	631.49	141.1	164.21	801.73	780.57	975.5	785.92	750.88	363.07
GiantSalamander_f13p60_1199_transcript28929_g1	.	109.92	116.41	123.01	150.28	207.95	179.48	165.23	229.77	135.18	163.09	179.37	149.31	63.57	49.87	112.7	104.24	63.88	89.16	435.72	534.13	365.65	242.82	687.72	596.74	325.52	322.19	320.53	208.38	223.1	250.3	466.36	470.35	464.06	714.35	971.17	437.08	407.54	341.93	477.53	360.2	870.63
GiantSalamander_f3p50_3842_transcript1289_g1	PREDICTED: protein-glutamine gamma-glutamyltransferase E-like [Chrysemys picta bellii]	0	0	0	0	0	0.19	0.07	0	0	0	0	0	0	0	0	0	0.04	0	545.27	253.88	701.42	158.96	0.2	52.37	537.06	487.69	430.09	1130.3	603.08	636.56	0.38	0	0.11	0	0	101.81	54.09	205.16	358.74	17.72	0.21
GiantSalamander_f2p24_2772_transcript21766_g1	PREDICTED: vegetative cell wall protein gp1-like [Pelodiscus sinensis]	0.07	0.08	0.05	0.03	6.23	0.07	0.02	2.41	0.02	0	0.67	0.08	0.05	0.04	0	0.01	0.08	0.5	193.92	172.94	122.09	185.17	1120.57	103.59	1.36	1.27	0.05	3.56	8.13	2.48	0.17	1.55	0.46	5.96	2.95	579.19	202.67	83.47	256.41	346.37	311.99
GiantSalamander_f2p15_2402_transcript24119_g1	PREDICTED: 14-3-3 protein beta/alpha-A [Astyanax mexicanus]	509.37	494.54	474.38	596.28	594.56	574.95	363.01	159.74	112.16	429.29	335.77	396.28	77.1	59.09	81.04	107.22	99.31	72.18	697.96	605.9	706.37	508.72	741.89	736.29	749.31	667.03	815.98	978.93	886.05	823.86	418.7	413.97	542.24	429.43	682.49	629.52	605.85	780.56	886.42	1034.09	988.56
GiantSalamander_f2p26_3000_transcript20231_g1	PREDICTED: inter-alpha-trypsin inhibitor heavy chain H3-like isoform X3 [Aquila chrysaetos canadensis]	0.02	0.03	0.01	0.09	0.04	0.02	0.15	0.04	0.15	0.01	0.98	0.01	1117.78	915.44	704.45	361.36	953.63	844.67	0.07	0.1	0.08	0.04	0.04	0	0	0.01	0.1	0	0.01	0.02	0	0	0.01	0.1	0.18	0.02	0.05	0	0	0.26	0.2
GiantSalamander_f6p60_4051_transcript1026_g1	PREDICTED: uncharacterized protein LOC102354522 [Latimeria chalumnae]	1.66	1.25	1.64	0.94	1.05	0.78	2.45	0.54	0.42	0.38	0.41	0.43	81.78	54.61	76.95	26.82	74.08	24.76	592.07	634.84	537.28	99.15	58.34	164.87	519.35	644.89	448.3	66.76	51.48	227.68	1038.94	1112.79	982.85	297.25	419	397.83	642.84	517.67	62.91	34.95	129.01
GiantSalamander_f6p60_533_transcript14426_g1	PREDICTED: NADH dehydrogenase [ubiquinone] 1 beta subcomplex subunit 7 [Pelodiscus sinensis]	195.27	227.25	172.8	197.3	314.68	270.54	500.7	555.06	549.43	940.07	1111.31	684.57	112.84	129.9	290.7	295.03	86.47	193.5	147.05	180	225.02	135.66	320.74	296.68	187.99	223.73	192.7	144.32	162.85	181.63	202.57	212.05	327.05	330.48	413.78	195.79	142.16	201.28	218.51	145.5	338.07
GiantSalamander_f14p60_3176_transcript3056_g1	PREDICTED: keratin, type II cytoskeletal 75 [Felis catus]	0	0	0	0	0	0	0	0	0	0.27	0	0	0	0	0	0	0	0	74.97	76.52	76.95	121.17	0.37	90.59	409.96	184.34	388.7	1110.91	938.84	349.45	0	0	0	0	0	129.99	21.28	143.26	411.45	59.78	0
GiantSalamander_f69p60_2336_transcript24002_g1	keratin 19, type I [Xenopus laevis]	48.1	63.15	32.29	62.75	14	15.27	155.42	26.29	13.78	23.45	20.25	15.66	64.92	66.27	73.99	38.76	63.67	82.33	78.49	68.17	179	156.57	222.08	147.75	56.14	67.75	24.13	39.96	41.86	91.13	870.13	1109.09	1076.32	452.69	487.58	251.79	150.77	145.48	363.25	200.25	216.96
GiantSalamander_f3p28_2983_transcript20375_g1	PREDICTED: inter-alpha-trypsin inhibitor heavy chain H3 [Pelodiscus sinensis]	0.05	0	0	0	0	0	0.22	0	0	0.05	0	0	31.68	2.42	1044.91	327.37	2.11	1.71	0	0	0.04	0	0	0	0	0	0	0	0.02	0	0	0	0	0.15	0.19	0	0	0	0	0.1	0
GiantSalamander_f13p60_1366_transcript28481_g1	PREDICTED: betaine--homocysteine S-methyltransferase 1 [Sarcophilus harrisii]	13.6	19.43	24.57	21.7	30.83	13.68	2.04	0.13	0.25	0.78	0.99	0.3	1026.89	1102.75	921.13	1084.31	404.26	571.07	19.88	2.99	52.11	422.54	99.53	111.01	40.81	45.33	40.56	59.35	74.87	88.45	3.99	9.12	9.89	21.69	11.46	17.17	2	2.87	12.73	17	12.68
GiantSalamander_f3p56_2689_transcript22168_g1	PREDICTED: catalase [Marmota marmota marmota]	10.43	12.14	10.2	8.83	6.52	3.56	71.48	15.91	18.22	77.01	39.66	57.04	973.54	1095.47	709.39	169.93	462.17	544.79	24.05	35.55	32.96	12.18	11.29	12.41	10.11	9.96	10.95	14.26	13.32	7.04	18.49	16.73	18.18	6.14	6.44	24.75	36.57	26.15	10.29	16.26	10.62
GiantSalamander_f241p60_2653_transcript4604_g1	RecName: Full=Zinc-binding protein A33	983.52	1091.93	1039.81	1000.21	543.55	958.32	261.85	155.31	109.49	270.48	225.43	225.61	155.91	148.01	215.1	139	111.75	162.55	558.89	443.54	732.16	220.72	217.59	356.83	356.89	393.44	481.91	272.47	266.29	314.43	671.9	707.56	740.6	300.98	446.51	471.61	397.07	643.67	366.01	329.66	342.85
GiantSalamander_f10p60_1861_transcript26789_g1	SET [Homo sapiens]	682.37	743.37	661.63	828.15	580.11	937.34	409.53	146.25	87.69	499.61	412.86	434.41	201.53	184.8	305.88	347.82	222.33	293.05	702.54	703.48	747.46	464.98	644.32	751.53	529.89	535.61	579.47	495.26	463.61	556.99	599.55	656.87	895.81	594	990.71	664.13	532.82	692.73	785.28	780.49	1028.11
GiantSalamander_f7p60_1902_transcript10497_g1	PREDICTED: alpha-enolase isoform X1 [Calidris pugnax]	958.94	989.82	987.33	948.75	875.56	1087.22	336.57	136.09	91.3	298.04	254.53	255.73	508.48	463.93	544.66	531.69	424.83	604.07	455.55	471.81	383.05	597.36	279.18	677.8	441.43	438.19	351.66	473.41	415.94	507.86	507.68	481.4	468.22	247.78	386.89	614.33	451.36	377.65	554.58	534.35	515.51
GiantSalamander_f13p60_1098_transcript29228_g1	PREDICTED: histone H3.3-like [Aotus nancymaae]	717.75	691.82	664.15	854.27	616.4	939.75	318.59	155.64	124.35	553.08	369.84	466	169.87	149.21	237.75	100.12	189.18	173.28	473.85	532.35	437.77	300.74	428.84	411.67	505.9	492.67	569.85	539.2	536.48	428.95	510.57	531.71	653.06	468.77	773.66	667.01	602.7	629.8	511.91	502.96	582.42
GiantSalamander_f3p60_1101_transcript29156_g2	guanine nucleotide-binding protein subunit beta-2-like 1 [Xenopus tropicalis]	250.55	284.73	247.34	227.65	271.98	266.95	458.05	284.06	289.18	455.63	401.5	361.49	170	163.56	290.96	147.21	132.15	204.2	462.94	581.52	480.41	325.22	712.95	1004.77	396.42	373.39	355.28	285.9	262.58	287.02	351.69	358.54	459.3	331.76	400.92	819.66	484.7	522.67	743.88	482.14	1080.36
GiantSalamander_f6p60_688_transcript14078_g1	PREDICTED: galectin-1 [Ornithorhynchus anatinus]	29.59	58.63	49.78	54.21	47.71	75.58	99.29	41.78	38.24	124.29	152.47	256.56	37.81	46.45	97.93	108.97	46.63	145.15	249.49	345.83	435.32	414.91	489.19	780.15	255.33	308.75	258.53	395.34	421.46	508.18	57.34	118.14	137.22	145.35	178.94	469.67	550.92	539.69	338.52	462.66	1079.49
GiantSalamander_f4p60_672_transcript30203_g1	selenoprotein W, 2b [Danio rerio]	68.21	61.37	31.03	38.35	19.97	38.46	645.2	118.57	50.78	233.25	102.38	234.41	182.29	190.21	86.85	49.88	142.96	154.2	634.51	692.1	319.01	265.08	113.96	460.92	589.22	510.16	283.62	244.62	261.1	416.62	1074.28	941.62	454.93	67.96	175.05	663.14	646.86	413.17	607.24	330.22	215.79
GiantSalamander_f24p60_2134_transcript25480_g1	Carboxypeptidase E [Rattus norvegicus]	1055.77	823.51	917.34	845.55	734.34	1073.89	17.87	3.59	2.36	8.81	3.67	8.91	0.44	0.61	0.55	0.04	0.19	0.22	7.53	5.25	8.49	11.8	2.18	3.29	12.08	10.92	10.59	9.25	11.86	7.63	4.49	4.87	3.22	1.63	1.87	3.23	4.91	2.29	2.03	2.68	2.28
GiantSalamander_f19p60_3223_transcript18751_g1	Keratin, type II cytoskeletal 75, partial [Podiceps cristatus]	0.06	0.1	0	0	0	0	0	0	0	0.11	0.55	0	0.04	0.17	0	0	0	0	7.75	404.88	50.39	69.24	4.45	240.07	11.8	801.47	130.48	242.56	123	1066.13	0.24	8.37	0	0	0.81	13.94	932.51	256.3	366.95	81.13	27.03
GiantSalamander_f2p50_709_transcript30148_g1	PREDICTED: uncharacterized protein LOC101731543 isoform X2 [Xenopus tropicalis]	0	0	0.03	0	0.3	0.23	0.07	0.51	0.57	0	0.16	0.06	14.77	13.9	22.43	892.46	384.4	828.26	0	0.26	0.17	0.07	0	0	0	0	0	0	0	0	0	0	0	0	0.22	0.04	0.12	0.14	0.13	0	0
GiantSalamander_f3p60_1753_transcript27215_g1	PREDICTED: lymphocyte antigen 6A-2/6E-1-like [Xenopus tropicalis]	25.07	31.89	22.87	28.04	37.51	20.52	5.94	3.16	1.36	2.86	4.05	4.04	20.83	25.64	33.63	4.35	4.58	15.47	529.54	501.06	1059.39	121.85	201.77	440.27	471.59	566.82	577.4	451.43	350.59	696.61	154.72	187.8	274.98	112.62	145.47	487.24	446.67	764.07	318.67	272.63	401.37
GiantSalamander_f18p60_747_transcript13933_g1	Cu/Zn superoxide dismutase [Cyprinus carpio 'jian']	390.82	399.18	379.27	449.98	488.09	495.44	317.76	77.05	58.39	265.06	183.6	193.7	863.5	871.79	768.49	217.18	799.12	912.27	289.78	295.84	387.37	184.97	128.66	234.91	289.27	284.33	340.55	313.76	279.82	252.87	356.16	340.19	393.31	91.29	176.41	316.02	265	380.96	326.66	331.85	151.36
GiantSalamander_f11p60_897_transcript13592_g1	PREDICTED: glutathione S-transferase Mu 3-like isoform X1 [Alligator sinensis]	318.5	302	281.82	358.89	450.16	362.51	479.41	309.48	309.22	581.76	612.41	541.46	633.66	600.83	883.71	754.88	769.53	981.71	446.4	540.75	328.7	472.69	774.81	986.97	412.63	375.71	344.48	450.39	450.74	450.18	572.28	530.78	592.15	553.55	779.39	618.33	549.49	467.29	909.59	871.14	1057.29
GiantSalamander_f30p60_1370_transcript28534_g1	voltage-dependent anion-selective channel protein 2 [Xenopus tropicalis]	464.68	511.64	465.38	455.06	452.88	481.29	887.14	275.09	209.48	1046.07	778.52	705.8	151.64	149.2	169.89	83.32	142.89	157.45	362.73	365.52	506.74	506.73	291.84	474.62	467.87	498.77	513.83	472.11	532.03	507.85	478.93	496.26	570.77	261.31	376.5	403.02	340.51	455.21	422.02	360.1	341.89
GiantSalamander_f2p40_1546_transcript27970_g1	PREDICTED: neuromodulin [Alligator mississippiensis]	723.35	827.97	721.34	1043.55	828.92	916.87	0.4	0.14	0	0.24	0.61	0.85	0.21	0.19	0.2	0	0.02	0.32	4.38	1.46	7.21	22.61	3.87	7.1	5.03	6.19	5.04	7.25	8.17	7.25	0.06	0.06	0.35	0.97	0.18	3.36	2.15	1.02	1.55	1.68	5.23
GiantSalamander_f11p60_580_transcript30426_g1	PREDICTED: ribonuclease UK114 [Stegastes partitus]	103.96	105.02	91.3	118.87	109.89	161.92	99.79	34.87	25.25	171.48	121.26	97.93	677.08	760.11	805.16	495.95	949.01	644.35	31.63	30.99	32.31	52.57	30.99	43.17	34.4	34.86	31.82	44.79	54.47	44.2	35.79	30.93	46.98	23.42	40.87	49.33	38.59	39.47	38.51	52.38	37.43
GiantSalamander_f5p60_689_transcript30189_g1	cytochrome c-like protein, partial [Equus caballus]	199.3	191.17	191.35	201.42	212.44	243.45	741.04	219.95	153.25	1031.22	515.32	770	50.6	48.88	37.52	6.51	36.64	25.64	139.43	117.52	273.58	120.36	49.62	89.86	228.64	284	256.97	344.19	280.35	298.73	282.79	288.06	311.98	101.61	267.74	121.53	111.08	255.78	142.75	143.85	66.11
GiantSalamander_f6p60_489_transcript14580_g1	.	0	0	0	0	0	0.39	0	0.68	0	0	0.27	0	134	155.49	335.3	1030.68	112.09	98.62	0	0.26	0	0	0	0	0	0	0	0	0.09	0	0	0.05	0	0	0	0.21	0	0	0	0	0
GiantSalamander_f2p37_1620_transcript27629_g1	PREDICTED: serpin B10-like [Chrysemys picta bellii]	6.2	6.9	4.33	4.3	3.29	1.83	0.47	0.28	0.29	0.36	0.47	0.17	0.53	0.29	1.48	0.09	0.18	1.31	431.34	406.78	332.17	261.11	259.97	337	759.1	728.98	1028.93	923.27	848.08	668.97	141.31	145.4	138.32	64.98	94.25	487.59	407.15	472.33	485.42	570.25	415.48
GiantSalamander_f21p60_1624_transcript27671_g1	PREDICTED: tryptophan 2,3-dioxygenase [Chelonia mydas]	0.72	0.69	1.07	0.6	0.61	0.37	0.1	0	0.13	0.01	0.94	0	1027.17	970.27	920.08	80.01	914.46	733.33	0.19	0.15	0.03	0.03	0.09	0	0	0	0.23	0	0	0	0.04	0	0.01	0.11	0.13	0	0	0.04	0	0.09	0.42
GiantSalamander_f14p60_527_transcript14493_g1	cytochrome c oxidase subunit VIIa polypeptide 2 (liver) [Xenopus laevis]	247.39	244.82	210.77	229.92	332.16	302.52	786.09	364.53	229.53	1020.31	791.53	850.72	162.05	163.47	262.69	133.28	206.6	151.59	251.39	278.6	367.97	206.45	268.09	277.19	361.01	427.4	406.77	554.02	511.5	419.23	547.07	537.32	794.87	403.66	891.08	252.82	286.69	463.61	426.29	612.75	328.02
GiantSalamander_f2p60_1278_transcript28776_g2	.	60.72	59.71	63.04	65.22	0.18	0.31	241.37	0.58	0.37	318.13	0.55	0.62	184.56	152.95	540.21	1020.24	0.86	1.04	200.49	230.74	190.48	295.61	0.47	0.73	201.69	212.68	154.17	201.36	0.46	0.29	131.12	167.16	224.46	0.52	1.12	212.42	203.84	176.36	350.33	0.37	1.91
GiantSalamander_f29p60_821_transcript13737_g1	PREDICTED: LOW QUALITY PROTEIN: histone H3.3 [Felis catus]	376.87	383.67	336.86	549.59	366.97	611	313.52	62.3	53.87	398.97	178.82	341.86	271.98	281.52	261.2	80.51	361.14	227.11	529.81	425.3	747.26	328.2	182.63	321.06	484.42	549.32	624.37	939.69	940.27	715.98	615.02	636.19	1010.19	218.41	460.02	511.23	534.47	909.27	488.16	669.25	287.75
GiantSalamander_f2p60_2506_transcript6837_g2	fibrinogen alpha chain precursor [Xenopus laevis]	0.04	0	0	0.05	0	0	0.33	0	0	0.07	0.6	0	863.14	0	0	1003.99	662.29	0.11	0.06	0	0.11	0	0.05	0	0	0	0	0	0	0.01	0	0	0	0	0.03	0	0.04	0	0	0.24	0
GiantSalamander_f2p44_1568_transcript11643_g1	Myozenin-1-like [Xenopus laevis]	1.42	0.31	0.67	0.65	7.11	0.35	30.24	11.86	12.32	31.52	39.63	22.59	0.17	0.19	0.07	1.81	0.17	19.64	52.33	0.24	108.2	939.88	41.2	311.37	202.66	222.07	179.56	278.14	368.93	394.2	3.42	10.43	8.49	17.75	5.76	15.46	0.39	0.38	0.14	0.32	0.92
GiantSalamander_f2p60_923_transcript13531_g2	PREDICTED: cofilin-1 isoform X2 [Physeter catodon]	25.68	24.28	30.69	27.4	283.8	31.57	69.46	575.72	427.33	120.42	350.46	224.45	11.26	6.56	95.42	269.98	13.65	35.87	34.89	53.34	57.71	20.51	668.11	215.65	25.75	27.61	34.11	42.12	26.64	36.08	23.67	26.47	139.59	546.33	741.09	27.34	32.7	80.23	125.11	358.41	732.41
GiantSalamander_f16p60_2625_transcript6132_g1	PREDICTED: secretogranin-1 [Chelonia mydas]	835.12	756.15	799.82	895.38	470.27	872.99	0.13	0.11	0.02	0.07	0.1	0.28	0.39	0.14	0.11	0.01	0.14	0.08	0.7	0.33	4.09	8.41	0.51	0.48	4.54	3.09	4.17	3.15	3.67	2.63	0.21	0.39	0.41	0.43	0.24	1.63	6.26	1.78	1.03	2.4	1.67
GiantSalamander_f2p30_5309_transcript15485_g1	fibrinogen gamma chain precursor [Xenopus laevis]	0.19	0.03	0.08	0.13	0.13	0.05	0.66	0.16	0.15	0.05	0.38	0.04	996.44	914.19	889.52	449.43	613.64	663.16	0.75	1.51	0.52	0.11	0.45	0.07	0.03	0.03	0.21	0.06	0.04	0	0	0	0.01	0.16	0.19	0.65	0.38	0.35	0.59	0.47	0.71
GiantSalamander_f2p28_1502_transcript11916_g1	.	41.67	44.73	64.29	42.06	101.58	111.21	115.49	249.62	208.68	155.31	332.38	317.23	110.66	101.53	296.71	329.71	286.57	477.63	124.7	134.24	182.15	167.83	504.81	559.2	111.49	112.25	120.18	115.9	213.64	290.84	88.43	106.24	150.84	396.02	656.51	166.82	109.78	145.22	167.47	384.43	992.72
GiantSalamander_f3p32_3476_transcript17955_g1	PREDICTED: collagen alpha-1(III) chain-like, partial [Tyto alba]	31.51	5.63	20.85	12.37	23.66	4.92	638.04	70.17	38.74	153.32	187.02	165.64	84.84	21.66	101.29	5.64	21.62	28.35	182.01	82.65	141.05	353.73	81.65	192.57	585.28	382.27	376.02	988.48	452.72	307.89	70.65	79.91	172.35	78.26	23.28	646.26	406.5	502.3	281.21	490.49	129.76
GiantSalamander_f8p60_620_transcript30311_g1	PREDICTED: C-C motif chemokine 28-like isoform X1 [Latimeria chalumnae]	0	0	0	0.65	4.61	0.08	0	0.05	0	0.06	1.22	0	0.05	0.05	0	0	0.25	0	2.49	1.81	2.22	51.18	258.5	37.87	12.11	3.96	12.31	285.07	298.46	85.02	0	0.31	0.55	9.39	3.08	58.92	18.58	51.87	470.41	987.27	312.32
GiantSalamander_f9p60_760_transcript13906_g1	PREDICTED: proline-rich transmembrane protein 1-like [Cyprinodon variegatus]	0	0.13	0.06	0.06	0.1	1.19	1.81	0.6	0.48	0.41	1.12	1.1	94.2	56.54	94.36	116.21	174.4	213.44	4.16	1.2	2.35	0.72	0.46	1.48	0.08	0.53	0.63	2.24	1.45	3.28	0.47	0.79	0.8	0.63	2.24	0.57	1.18	1.64	1.13	1.77	1.24
GiantSalamander_f2p60_846_transcript29790_g2	PREDICTED: galectin-4-like [Xenopus tropicalis]	0.21	0.29	0	0.11	4.09	0.36	0.22	37.4	0.11	0.03	0.03	0	0	0.03	0	0.1	0.21	0.4	703.88	523.2	985.85	108.28	816.11	155.28	3.14	8.15	0.06	1.56	2.75	1.63	0.04	11.72	1.68	14.21	8.59	556.32	652.95	389.11	95.53	51.6	116.51
GiantSalamander_f5p60_633_transcript30288_g1	PREDICTED: retinoic acid receptor responder protein 2 [Canis lupus familiaris]	0	0	0	0	0.15	0	0.1	0	0.13	0.06	0.21	0	235.2	159.01	153.93	198.75	319.07	423.17	0	0.06	0	0.05	0	0	0	0	0	0	0	0	0	0	0	0.16	0.13	0	0.06	0	0	0.14	0
GiantSalamander_f3p60_699_transcript30158_g2	PREDICTED: waprin-Rha1 [Tribolium castaneum]	0.16	0.47	0	0	0.81	0.07	0.13	0	0	0.03	0.25	0.1	0	0	0	0	0.29	0	223.63	66.99	123.53	33.88	91.31	163.88	132.96	168.84	331.56	685.66	349.54	388.99	0.32	0.28	1.92	0.5	0.22	69.29	24.73	364.87	264.66	291.37	129.25
GiantSalamander_f2p60_531_transcript14479_g3	.	225.38	313.38	280.61	413.18	981.98	287.46	0	0.15	0.06	0	0.15	0.58	0.15	0.08	0	0	0.07	0.07	152.65	271.78	17.66	58.55	43.77	152.08	90.48	70.7	25.84	14.29	18.82	106.82	82.07	113.99	268.38	213.01	236.34	91.88	179.07	16.64	88.97	2.69	172.18
GiantSalamander_f2p60_773_transcript29967_g1	PREDICTED: glutathione S-transferase P 1-like [Xenopus tropicalis]	0	0	0	0	0.58	0	0	0.37	0.35	0.9	1.21	0.14	5.17	8.69	11.55	282.02	11.72	16.07	2.44	5.07	2.42	0.72	69.29	7.46	1.81	3.71	3.52	1.53	3.47	2.33	2.13	5.36	5.68	138.54	31.09	0.83	1.92	4.98	6.73	4.12	73.57
GiantSalamander_f2p12_1557_transcript11974_g1	PREDICTED: uromodulin-like [Xenopus tropicalis]	0.26	0.36	0.22	0	0.1	0.6	0.12	0	0.11	0.18	0	0.05	0.13	0.22	0	0.15	0.05	0.49	197.06	978.23	73.78	171.31	0.06	176.72	191.47	438.59	150.98	18.08	0.14	145.65	90.7	270.37	161.32	0.24	295.45	321.83	962.29	106.68	481.75	0	418.95
GiantSalamander_f15p60_1463_transcript28215_g1	PREDICTED: interleukin enhancer-binding factor 2 [Protobothrops mucrosquamatus]	918.34	976.59	868.99	829.96	628.39	879.6	491.94	211.43	162.69	566.41	473.82	465.14	212.93	189.29	315.15	378.35	160.46	253.65	737.17	696	863.34	422.09	562.6	783.81	587.09	595.5	651.28	422.35	425.6	495.96	710.46	765.77	967.7	398.62	632.29	872.58	693.4	829.74	770.77	669.57	856.15
GiantSalamander_f3p32_3430_transcript18137_g1	reverse transcriptase-like protein [Takifugu rubripes]	0.16	0.15	0.28	0.28	0.34	0.18	0.15	0.17	0.16	0.07	0.02	0.03	0.06	0.14	0.02	0.01	0.02	0.01	47.1	5.07	5.16	0.51	515.97	129.9	635.73	442.11	975.71	364.11	429.08	193	0.14	0.1	0.13	0.26	0.14	0.18	0.11	0.39	1.4	1.5	0.62
GiantSalamander_f3p60_2069_transcript25869_g1	PREDICTED: chromogranin-A [Chrysemys picta bellii]	534.21	734.12	679.92	504.18	655.37	938.11	2.41	0.68	2.06	0.39	5.99	0.33	0.62	0.33	1.07	0.16	2.23	0.23	0.51	1.05	3.12	6.66	3.05	0.49	1.63	2.81	5.16	1.22	2.46	0.58	1.23	1.54	4.49	2.52	0.56	0.42	11.99	0.9	0.3	2.43	1.02
GiantSalamander_f5p60_1986_transcript9980_g1	PREDICTED: fatty acyl-CoA hydrolase precursor, medium chain-like [Chelonia mydas]	0.15	0.18	0.09	0.15	0.15	0.07	0.27	0.08	0.21	0.1	0.73	0.08	774.11	760.94	878.1	973.21	730.8	870.32	0.1	0.09	0.26	0.37	0.54	0.28	0.01	0.05	0.14	0.05	0.06	0.14	0.01	0.03	0	0.04	0.39	0.03	0.06	0.03	0.01	0.22	0.16
GiantSalamander_f28p60_1271_transcript28744_g1	PREDICTED: nucleophosmin isoform X1 [Picoides pubescens]	216.06	230.94	218.04	206.85	194.54	215.67	324.41	131.92	89.76	317.11	269.15	288.41	174.64	173.54	259.88	356.32	382.9	197.41	430.97	542.72	566	464.12	482.68	621.45	414.96	405.78	460.19	629.95	626.58	496.48	412.86	473.65	803.26	303.62	540.48	525.28	564.54	695.82	678.88	971.85	848.95
GiantSalamander_f9p60_448_transcript14755_g1	PREDICTED: NADH dehydrogenase [ubiquinone] 1 alpha subcomplex subunit 1 [Latimeria chalumnae]	225.42	243.39	233.88	227.47	443.25	291.64	581.2	443.86	290.67	967.12	712.03	730.49	86.48	70.28	158.29	45.81	103.44	89.73	108.16	138.75	171.52	152.38	154.17	195.54	179.65	185	157.94	226.31	245.99	205.33	159.89	171.03	257.25	174.19	319.18	153.6	136.76	181.5	159.38	250.35	189.19
GiantSalamander_f2p54_556_transcript30507_g1	PREDICTED: ATP synthase-coupling factor 6, mitochondrial [Apteryx australis mantelli]	206.66	189.65	182.07	204.84	269.73	269.93	520.91	288.09	174.65	964.75	759.52	791.03	118.46	110.62	219.32	194.41	148.81	128.56	144.89	157.73	172.58	147.44	170.16	194.34	215.06	211.79	212.88	296.31	310.59	261.2	255.59	252.93	369.58	307.66	608.39	152.32	155.04	213.9	195.81	298.65	212.43
GiantSalamander_f20p60_2101_transcript25334_g1	PREDICTED: DBIRD complex subunit ZNF326 [Chelonia mydas]	961.1	964.43	956.86	737	655.71	768.96	526.88	282.7	183.8	525.04	470.33	490.87	260.78	223.26	348.47	430.83	353.53	224.4	585.43	577.37	681.77	466.59	430.4	562.78	531.77	526.49	620.15	574.11	542.1	564.58	690.43	691.6	897.77	466.46	826.49	568.73	598.78	723.11	569.96	829.12	773.87
GiantSalamander_f3p60_774_transcript29995_g2	PREDICTED: small muscular protein isoform X1 [Chelonia mydas]	0.79	1.16	0.5	1.35	1.92	0.42	843.76	316.68	210.69	960.73	702.24	844.23	1.53	2.77	1.46	0.8	3.42	3.48	16.84	0.47	37.89	188.87	6.35	70.69	136.04	160.18	104.63	151.4	156.74	170.95	14.19	19.86	12.73	10.11	12.36	9.42	0.51	0.86	0.55	0.44	1.25
GiantSalamander_f3p36_456_transcript14672_g1	PREDICTED: cytochrome c oxidase subunit 8A, mitochondrial [Cavia porcellus]	553.29	613.15	547.84	528.76	746.53	669.5	278.2	219.69	139.96	244.41	166.96	166.46	126.01	134.96	216.03	126.05	48.86	89.38	286.66	379.55	276.71	125.39	351.48	371	326.09	343.92	307.1	221.09	210.48	223.89	628.88	621.45	659.32	541.82	959.75	402.85	332.99	381.84	337.71	238.96	471.49
GiantSalamander_f23p60_1822_transcript10834_g1	PREDICTED: brain acid soluble protein 1 [Leptosomus discolor]	845.73	754.51	700.71	925.66	777.46	957.41	37.29	12.96	7.37	33.67	23.02	25.53	126.57	135.77	127.76	51.91	85.71	84.26	50.79	35.43	72.82	56.63	26	32.04	16.84	15.03	12.31	15.19	25.98	14.91	30.63	26.77	39.21	23.04	27.56	38.55	37.14	36.75	14.25	14.51	21.86
GiantSalamander_f56p60_1501_transcript11889_g1	PREDICTED: serpin B5 [Chelonia mydas]	0.18	0.12	0.43	0.54	2.73	0.23	0.07	0.26	0.16	0.14	0.72	0.01	0.09	0.11	0.07	0.08	0.13	0.23	290.28	206.94	284.04	161.79	293.49	299.17	519.8	476.19	643.12	954.93	944.7	605.36	22.33	26.35	37.04	39.06	35.34	286.02	260.13	362.45	444.17	593.02	344.26
GiantSalamander_f3p52_664_transcript30240_g1	PREDICTED: translocon-associated protein subunit delta isoform X1 [Xenopus tropicalis]	359.41	397.52	252.2	291.51	256.22	342.27	486.55	533.47	276.63	512.22	375.07	408.04	271.09	247.38	334.88	560.24	273.03	466.51	398.77	529.92	305.65	352.93	471.38	760.06	342.48	340.35	211.13	213.24	234.39	337.53	315.46	327.56	308.16	285.18	578.41	773.65	450.88	304.4	662.84	449.97	952.09
GiantSalamander_f2p55_2441_transcript7154_g1	PREDICTED: apomucin-like [Microtus ochrogaster]	0.06	0.1	0.04	0.18	8.22	0.55	0.04	0.03	0.13	0.08	0.32	0	0.05	0.05	0	0.2	0	0.08	91.01	194.54	56.82	30.75	170.52	45.64	0.47	1.24	1.14	12.24	12.04	12.55	0.1	0.01	0.02	0.77	0.23	473.17	89.72	93.21	942.25	440.11	328.56
GiantSalamander_f12p60_469_transcript14628_g1	Glycylpeptide N-tetradecanoyltransferase 2 [Myotis brandtii]	280.32	387.37	362.71	503.2	935	549.7	51.38	23.51	19.45	72.04	66.51	67.7	19.67	15.95	23.63	7.64	41.24	25.56	8.74	6.66	14.88	35.76	19.16	23.1	12.89	12.41	7.51	29.14	36.92	23.06	4.99	4.06	6.5	12.16	11.9	27.61	25.33	27.97	34.07	37.6	28.17
GiantSalamander_f2p16_2664_transcript6056_g1	keratin 5, partial [Ambystoma mexicanum]	0	0	0	0	0	0	0	0	0	0	0	0	0	0	0	0.01	0	0.01	2.21	0.43	6.65	0	139.25	1.42	2.68	3.41	4.33	3.56	3.38	6.61	0.13	0	0.3	8.44	1.36	0.21	0.11	0.59	1.2	1.44	5.77
GiantSalamander_f2p58_1976_transcript9973_g1	ATP synthase subunit alpha, mitochondrial [Xenopus laevis]	471.8	471.84	454.43	415.83	313.17	428.73	763.54	191.62	129.53	927.64	624.85	652.99	258.45	246.1	292.22	105.14	204.65	208.11	424.29	347.03	455.58	337.37	221.06	396.99	525.98	516.37	597.02	518.8	494.47	541.87	675.34	613.18	679.03	186.84	350.2	430.19	340.96	510.56	410.31	455.7	268.5
GiantSalamander_f16p60_3305_transcript18601_g1	PREDICTED: keratin, type II cytoskeletal [Xenopus tropicalis]	0	0	0.01	0.02	1.85	0	2.33	1.72	1.21	0.46	0	0	0.01	0	0.08	0	0.21	0	765.24	181.75	643.96	465.57	196.31	421.53	438.8	230.27	315.44	422	927.3	427.29	39.73	48.09	7.63	20.94	6.94	869.64	225.77	210.15	388.87	674.3	208.11
GiantSalamander_f11p60_1341_transcript28526_g1	cysteine-rich secretory protein 2 [Crotalus oreganus helleri]	0.14	0.03	0.1	0.36	9.61	0.43	0.02	0.02	0.13	0	1.07	0.06	0.08	0.02	0.05	0.07	0.1	0.18	161.68	413.69	146.59	36.98	179.12	55.71	1.46	4.81	2.35	35.14	50.54	25.17	0.19	0.11	0	1	0.68	551.68	148.09	157.16	919.75	700.46	456.6
GiantSalamander_f427p60_2068_transcript8907_g1	complement factor I precursor [Xenopus tropicalis]	0	0.14	0	0.06	0	0	0.84	0.12	0.26	0.22	0.89	0	627.6	661.89	572.36	74.64	763.58	673.42	0	0.07	0	0	0	0	0	0	0.09	0	0	0	0	0	0	0.13	0.21	0	0	0	0	0	0.26
GiantSalamander_f2p16_4957_transcript15656_g1	PREDICTED: LOW QUALITY PROTEIN: titin [Ornithorhynchus anatinus]	1.91	0.19	0.26	0.35	2.38	0.13	548.68	445.66	264.34	698.7	579.21	598.43	0.21	0.18	0.03	0.34	0.07	15.26	78.74	0.27	136.98	921.69	25.54	255.05	318.86	328.16	266.4	347.45	242.13	464.16	6.96	20.02	12.8	16.67	10.75	19.88	0.53	0.27	0.01	0.19	0.7
GiantSalamander_f4p30_3659_transcript1760_g1	Atp1a1a.1 protein [Xenopus laevis]	725.35	921.26	904.81	905.87	572.43	601.88	282.72	124.91	74.57	358.91	253.41	242.74	9.57	12.19	14.02	8.41	8.79	10.91	14.52	10.9	21.72	43.17	8.95	18.8	20.9	19.56	20.66	14.64	25.5	19.63	15.48	21.49	16.58	7.41	8.44	21.7	14.18	15.37	15.64	15.66	12.82
GiantSalamander_f2p42_1542_transcript27900_g1	hypothetical protein DAPPUDRAFT_116839 [Daphnia pulex]	1.57	0.75	0.4	0.34	1.43	0.32	1.1	0.65	0.63	0.13	0.38	1.06	0.12	0.08	0	0	0	0.1	280.27	88.74	8.67	13.78	199.98	210.8	266.9	173.44	149	623.83	347.21	184.36	47.57	22.93	0.38	11.86	19.12	133.56	46.74	15.56	224.05	304.89	194.31
GiantSalamander_f8p60_2078_transcript9501_g1	PREDICTED: LOW QUALITY PROTEIN: actin, cytoplasmic 2 [Bison bison bison]	426.61	465.89	452.61	690.6	564.1	667.06	132.47	52.56	25.1	138.11	97	93.28	99.57	97.13	70.05	66.69	174.21	105.77	394.29	381.11	624.84	406.29	194.04	507.03	311.25	330.23	335	619.98	576.01	611.78	245.73	268.84	268.82	143.98	157.6	465.49	484.49	431.41	682.52	760.97	313.44
GiantSalamander_f2p22_3523_transcript2151_g1	alpha-1-antiproteinase precursor [Xenopus laevis]	0.02	0.03	0.01	0.09	0.05	0.01	0.14	0.08	0.2	0.01	0.51	0.03	896.9	905.47	791.4	494.56	514.78	693.28	0.07	0.09	0.03	0.03	0.02	0	0	0	0.12	0.01	0	0.01	0.01	0	0.01	0.07	0.14	0	0.02	0.01	0	0.08	0.25
GiantSalamander_f2p49_866_transcript13636_g1	.	0.25	0	0.14	0	0	0	0.09	0	0	0	0.04	0	0	0.04	0	0.24	0.18	0	10.85	0	5.78	32.2	2.18	0	59.52	0	86.95	225.46	0.21	0.08	0	0	0.83	0.13	0	50.58	0	31.36	93.4	0.81	1.8
GiantSalamander_f7p60_3726_transcript1482_g1	PREDICTED: neuronal membrane glycoprotein M6-a isoform X2 [Ornithorhynchus anatinus]	660.11	622.96	633.14	755.66	383.95	825.81	0.06	0.13	0.02	0.07	0.1	0.08	0.12	0.18	0.09	0	0.45	0.07	0.05	0.01	0.64	2.65	0.16	0.15	0.11	0.13	0.09	0.2	0.07	0.1	0.01	0.01	0.05	0.03	0	0.05	0.1	0	0.02	0.05	0.26
GiantSalamander_f4p60_2138_transcript9137_g1	neurofilament light polypeptide [Rattus norvegicus]	142.36	424.04	558.68	384.04	894.22	126.95	0.02	0.02	0	0.03	0.1	0.08	0.02	0.02	0.03	0.02	0.01	0.02	0.66	0.24	6.03	70.85	2.9	7.64	0.18	0.12	0.22	0.75	0.45	0.58	0.02	0.05	0.1	0.53	0.18	0.25	0.14	0.14	0.12	0.38	1.07
GiantSalamander_f5p60_503_transcript14564_g1	.	0	0.93	0.27	0.15	5.65	0.38	0.17	17.25	0	0	0	0.16	0.08	0	0.15	0	0.08	0.65	156.03	214.75	292.93	185.28	826.75	130.2	2.9	5.79	0	3.99	9.79	2.99	0.41	7.08	1.93	16	13.19	425.01	321.31	178.69	256.09	188.09	246.26
GiantSalamander_f3p35_5991_transcript73_g1	PREDICTED: myosin-6 [Peromyscus maniculatus bairdii]	1.03	0.6	1.99	2.04	1.93	0.66	750.47	882.24	591.71	554.09	892.63	607.44	0.01	0.01	0.03	0.25	0.01	0.11	1.78	0.14	3.1	35.1	4.75	7.65	38.14	30.89	33.94	50.19	79.35	93.13	1.12	3.83	4.83	17.14	3.34	7.73	0.06	0.05	0.02	0.07	0.24
GiantSalamander_f2p32_1007_transcript29390_g1	PREDICTED: cathelicidin-OH antimicrobial peptide-like [Chelonia mydas]	0.19	0.04	0.21	0.11	0.81	0.04	0	0.05	0.3	0.03	0.44	0.02	0.05	0.03	0.02	0.03	0	0.19	88.37	66.25	192.87	14.28	170.69	93.42	101.96	117.95	216.33	193.16	130.44	178.17	0.16	0.6	3.92	2.67	1.85	31.29	34.76	161.18	132.74	166.87	168.66
GiantSalamander_f3p43_1703_transcript11221_g1	PREDICTED: uncharacterized protein LOC100495238 [Xenopus tropicalis]	0.12	0.33	0.15	0.02	0.37	0.07	0.32	0.1	0.05	0.28	0.23	0.28	0.31	0.18	0.07	0.27	0.64	0.33	242.98	96.12	187.34	24.87	35.44	37.43	68.22	53.93	116.34	75.4	62.27	49.94	411.97	563.92	888.61	34.96	97.85	25.36	7.4	41.07	58.32	42.29	16.33
GiantSalamander_f12p60_547_transcript14416_g1	diazepam binding inhibitor [Xenopus laevis]	450.46	477.02	388.78	553.68	624.81	670.62	414.61	113.02	87.62	517.18	331.32	440.16	570.41	490.36	684.16	201.56	791.59	559.18	379.54	396.44	479.29	275.19	221.64	386.38	423.85	418.53	428.62	587.66	629.22	449.36	395.21	406.33	531.53	150.72	283.08	394.36	422.87	628.87	496.14	847.3	312.71
GiantSalamander_f56p60_2661_transcript5813_g1	PREDICTED: integral membrane protein 2A [Haliaeetus leucocephalus]	520.42	557.94	510.62	381.36	290.95	419.26	434.04	151.03	103.54	271.29	177.55	223.88	259.69	337.41	205.2	89.38	262.93	143.83	670.09	736.91	581.2	316.73	260.87	352.16	672.99	753.41	762.87	614.25	628.53	531.1	682.95	721.17	605.75	277.64	423.24	603.87	883.3	737.3	489.37	537.56	383.03
GiantSalamander_f5p60_2875_transcript20954_g1	myosin light chain 2 [Xenopus laevis]	0.23	0.21	0.41	0.57	2.99	0.3	16.1	5.29	2.34	10.68	8	10.64	0.05	0.06	0.02	0.14	0.14	0.07	30.45	0.54	70.62	318.36	11.15	137.82	577.24	519.67	487.27	620.22	881.48	792.62	6.66	19.68	27.63	35.55	13.16	33.52	0.4	0.35	0.1	0.25	0.96
GiantSalamander_f2p56_1400_transcript12266_g1	PREDICTED: nascent polypeptide-associated complex subunit alpha-like isoform X7 [Pantholops hodgsonii]	241.43	230.43	230.22	264.43	317.07	314.53	285.22	245.49	210.21	327.71	402.26	287.84	153.89	122.92	243.03	881.01	295.29	233.82	257.38	275.54	312.99	319	679.38	596.66	282.05	247.94	280.52	467.99	484.89	394.93	263.1	255.12	423.65	432.95	657.41	336.69	235.51	347.03	627.45	839.87	868.99
GiantSalamander_f7p60_553_transcript30511_g1	PREDICTED: cystatin-B [Aquila chrysaetos canadensis]	40.42	35.64	39.62	30.91	53.31	37.51	153.03	88.48	70.36	144.21	154.21	108.65	67.81	56.86	106.2	52.2	71.21	53.92	435.5	404.44	876.63	167.09	336.07	430.29	383.12	295.82	360.14	220.48	269.58	271.63	342.35	327.6	734.03	205.5	391.88	438.19	434.56	859.13	359.13	432.39	350.67
GiantSalamander_f42p60_1689_transcript10696_g1	PREDICTED: pigment epithelium-derived factor [Papio anubis]	30.68	39.4	36.45	41.97	24.78	13.63	29	102.23	60.74	83.55	72.39	34.31	298.97	296.69	317.77	611.47	215.41	428.01	157	130.56	175.26	277.27	133.58	160.64	137.19	130.72	122.38	128.81	194.26	136.33	40.93	52.32	72.03	96.42	47.42	250.42	282.05	194.47	107.9	110.49	218.31
GiantSalamander_f16p60_6100_transcript15308_g1	PREDICTED: hemopexin [Protobothrops mucrosquamatus]	0.04	0.1	0.06	0.02	0.02	0.01	1.54	0.26	0.24	0.27	0.41	0.14	650.68	795.93	870.91	594.49	261.38	459.19	1.49	0.77	5.15	0.1	1.01	0.3	0.2	0.12	0.17	0.03	0.03	0.08	2.21	2.59	1.14	0.97	3.36	0.08	0.12	0.27	0.01	0.13	0.23
GiantSalamander_f2p57_2792_transcript21495_g1	pyruvate kinase PKM isoform 1 [Xenopus tropicalis]	513.22	651.04	360.41	866.39	342.96	584.08	176.26	196.63	71.63	266.23	147.33	227.21	16.38	10.99	11.73	85.46	7.28	27.62	105.57	62.34	64.11	664.87	41.62	174.28	167.57	159.64	79.47	131.98	184.92	321.57	44.55	49.86	26.78	29.39	57.61	101.46	60.78	29.79	57.69	31.39	83.02
GiantSalamander_f4p43_3324_transcript18517_g1	Keratin, type II cytoskeletal 75, partial [Phoenicopterus ruber ruber]	0.77	0	0.93	0.49	1.29	0	0.14	0	0	0	0.09	0	0	0	0.03	0	0.06	0	230.61	1.53	269.73	82.37	56.96	0.52	866.24	4.18	264.05	643.59	570.09	5.41	4.28	0.15	2.95	1.85	0.15	569.81	6.15	333.7	447.4	436.72	0
GiantSalamander_f2p10_3777_transcript17184_g1	PREDICTED: LOW QUALITY PROTEIN: apolipoprotein B-100 [Chelonia mydas]	0.05	0.05	0.01	0.05	0.08	0	0.11	0	0.06	0.01	0.57	0	647.21	539.98	520.31	119.84	860.83	537.88	0.14	0.04	0.04	0.04	0.02	0.01	0.01	0.01	0.07	0	0	0	0	0	0.01	0.05	0.1	0	0.02	0	0	0.1	0.09
GiantSalamander_f4p60_501_transcript30653_g1	NADH dehydrogenase [ubiquinone] 1 alpha subcomplex subunit 5 [Xenopus tropicalis]	174.82	222.98	169.48	255.95	293.62	253.78	411.34	162.04	186.64	860.3	574.37	524.74	91.93	113.65	100.61	100.31	118.02	86.72	108.45	134.75	111.51	210.11	191.81	187.85	186.8	230.06	155.3	312.69	283.67	231.68	144.97	161.95	202.26	139.29	216.46	134.42	151.07	134.97	207.78	237.12	195.09
GiantSalamander_f2p60_617_transcript14263_g1	Small nuclear ribonucleoprotein F, partial [Bos mutus]	203.08	185.52	185.48	212.1	292.35	278.33	238.14	124.73	114.29	312.24	297.41	302.01	128.01	97.61	277.89	471.49	176.33	169.9	331.99	394.02	500.78	228.18	782.51	583.02	333.49	272.08	346.78	361.54	351.45	346.27	312.5	325.5	667.95	538.6	822.76	453.03	359.21	612.24	492.21	787.22	856.59
GiantSalamander_f40p60_845_transcript13659_g1	PREDICTED: histone H2A.Z [Falco cherrug]	286.56	323.34	238.64	372.53	235.83	503.73	255.03	29.94	31.46	358.97	226.93	305.38	100.43	99.33	105.28	44.63	144.9	110.68	411.1	360.22	574.27	206.36	207.17	319.61	373.77	445.08	471.77	665.53	650.51	503.36	504.99	519.45	852.93	173.42	376.67	442.93	398.92	767.67	391.93	607.07	242.69
GiantSalamander_f21p60_3287_transcript2686_g1	Keratin, type II cytoskeletal 75, partial [Podiceps cristatus]	0	0	0.64	1.35	0	0	0	0.53	0	0.06	0.69	0	0	0	0	0	0	0	11.21	180.3	83.98	74.48	11.39	364.38	22.22	287.53	160.43	345.32	223.06	343.65	0	1.87	0	0.45	0.15	25.4	89.34	269.01	850.9	249.45	30.5
GiantSalamander_f2p41_2940_transcript4053_g1	inner-ear cytokeratin [Rana catesbeiana]	0.69	0	0	0	2.07	0	0	0	0	0	0.36	0.11	0	0	0	0	0.03	0.17	44.98	0.06	0.63	1.06	131.21	0.29	45.12	0.51	1.19	3.99	2.78	0.38	0.06	0	3.01	1.43	0	390.21	0.14	1.66	27.75	358.58	0
GiantSalamander_f2p57_1684_transcript11156_g1	aldehyde dehydrogenase 1 family member A1 [Xenopus laevis]	8.91	6.44	7.09	2.89	0	0.24	13.84	0.15	0	13.59	0.25	2.59	824.06	846.93	519.4	0.83	408.34	389.19	55.27	37.95	29.09	11.4	0	2.42	52.02	44.3	36.68	6.81	11.41	15.95	150.04	126.66	68.48	0.04	0.15	37.97	66.53	44.27	3.21	4.38	0
GiantSalamander_f77p60_1630_transcript11392_g1	PREDICTED: cyclic AMP-dependent transcription factor ATF-4 [Struthio camelus australis]	313.32	406.4	331.91	448.05	528.58	473.87	300.11	549.61	456.15	418.06	530.8	384.02	40.43	43.33	78.82	202.26	46.44	103.9	182.97	220.17	172.06	151.87	586.34	420.52	133.06	152.83	103.08	150.84	116.96	167.94	205.23	274.62	160.53	420.23	602.9	201.89	175.64	163.11	355.01	227.32	782.3
GiantSalamander_f98p60_2215_transcript24728_g1	four and a half LIM domains protein 1 [Xenopus tropicalis]	9.27	8.65	6.69	13.42	8.5	3.69	841.72	294.68	133.28	612.03	431.39	522.66	18.89	11.24	24.67	4.36	8.18	3.95	59.05	6.59	99.76	625.58	10.59	112.81	477.51	432.98	321.56	463.41	473.79	503.32	38.34	70.63	46.04	37.9	35.89	66.7	24.71	19.15	8.49	12.89	7.45
GiantSalamander_f2p50_1414_transcript12209_g1	mal, T-cell differentiation protein-like [Xenopus tropicalis]	0.23	0.18	0.49	0.4	1.56	0.09	0.15	0.37	0.12	0.17	0.74	0.12	0.04	0.16	0.38	0.03	0.03	0.12	179.07	95.05	522.32	31.71	220.68	123.62	341.52	348.37	657.23	837.34	796.34	360.47	17.73	6.34	24.08	5.96	8.24	50.03	28.53	219.79	468.5	396.05	127.2
GiantSalamander_f7p60_427_transcript30874_g1	.	527.87	575.4	506.16	530.07	753.86	653.67	582	310.49	208.9	836.47	775.11	720.23	115.14	111.25	182.9	76.69	233.17	136.23	205.35	220.77	311.45	362.97	239.46	317.68	305.94	299.61	302.86	451.44	505.21	396.62	226.74	246.35	420.25	272.83	477.09	265.71	251.5	339.68	298.22	523.37	318.99
GiantSalamander_f2p60_1441_transcript12124_g1	PREDICTED: uncharacterized protein LOC106854221 [Sturnus vulgaris]	0	0.07	0.15	0	0	0	58.62	11.14	6.47	26.22	13.85	23.79	660.93	606.48	464.49	50.98	836.17	463.98	0.03	0.12	0.12	0.02	0.07	0	0.08	0.03	0.06	0.07	0.2	0.12	0.01	0	0.25	0	0.05	0	0	0	0	0.29	0.18
GiantSalamander_f6p60_1345_transcript12446_g1	histone H2A.J [Mus musculus]	827.61	453.53	392.74	0.47	304.49	663.5	342.09	0.09	48.44	0.51	115.62	269.83	182.2	84.74	78.88	0	74.48	93.61	178.86	92.53	78.9	0.29	70.5	173.77	232.59	98.38	111	121.83	140.04	177.29	243.85	120.93	115.43	57.39	203.96	259.25	111.44	117.77	0.16	92.68	207.75
GiantSalamander_f2p21_3595_transcript17557_g1	NDRG family member 4 isoform A [Alligator mississippiensis]	653.6	789.27	819.13	668.55	230.41	447.58	49.98	21.23	15.12	38.73	29.11	25.11	0.04	0.02	0.03	0	0	0.01	0.33	0.21	3.31	13.26	0.36	0.94	0.99	0.95	0.7	1.14	0.62	0.74	0.05	0.13	0.09	0.14	0.04	0.48	0.35	0.44	0.2	0.1	0.33
GiantSalamander_f4p60_3859_transcript16854_g1	PREDICTED: secretogranin-2 [Alligator mississippiensis]	730.31	817.09	734.29	665.43	361.6	586.74	45.01	4.39	1.25	7.91	2.94	5.77	0.29	0.37	0.3	0	0.15	0.09	1.44	1.4	4.62	5.93	0.19	0.59	1.37	2.03	3.51	2.14	2.15	1.02	10.12	8.75	4.38	0.73	1	0.77	4.54	1.15	0.57	0.72	0.57
GiantSalamander_f5p60_3610_transcript1721_g2	Keratin, type II cytoskeletal 75, partial [Phoenicopterus ruber ruber]	0	0	0.13	0.09	0	0	0.09	0	0	0	0	0	0	0	0	0	0.09	0	465.08	5.81	14.24	25.28	0.12	2.62	816.29	10.06	57	50.59	62.78	12.67	2.39	0.61	0.21	0	0	602.79	14.8	42.05	20.98	15.19	0.06
GiantSalamander_f2p30_4114_transcript842_g1	PREDICTED: collagen alpha-1(XVII) chain isoform X4 [Gekko japonicus]	0.17	0.25	0.21	0.24	0.72	0.2	0.2	0.06	0.12	0.03	0.17	0.08	0.08	0.04	0.05	0.02	0.09	0.35	225.31	216.7	815.14	64.02	62.54	140.93	98.22	136.98	129.41	130.37	62.79	187	93.31	157.14	221.25	73.87	96.05	129.71	120.24	252.84	133.97	198.73	75.32
GiantSalamander_f2p60_1439_transcript12161_g2	hypothetical protein DAPPUDRAFT_116839 [Daphnia pulex]	0.27	5.07	11.4	15.65	6.91	12.5	0.29	0.15	0.03	9.57	2.66	6.38	0.03	0.45	3.51	3.09	0.22	1.11	1.05	16.83	21.41	33.6	264.8	189.31	1.45	71.25	284.92	4.15	193.3	115.37	0.1	1.11	6.69	2.39	6.66	0.25	4.61	42.39	814.24	300.99	252.44
GiantSalamander_f4p60_1164_transcript12910_g1	Microsomal glutathione S-transferase 1, partial [Pygoscelis adeliae]	9.36	8.34	9.31	5.49	5.32	5.69	22.04	3.21	0.82	6.84	3.53	3.09	784.53	766.97	696.91	90.58	813.87	543.26	63.53	57.85	98.93	17.87	19.51	21.76	45.69	54.44	64.01	58.87	53.57	48.84	96.27	119.31	150.4	28.91	55.16	39.25	51.3	89	29.46	38.89	28.99
GiantSalamander_f3p50_1732_transcript11038_g1	clusterin precursor [Xenopus laevis]	564.38	533.74	514.23	399.38	433.66	338.4	282.08	205.62	190.08	180.59	548.84	225.6	5.17	7.65	13.53	2.68	4.17	6.9	5.68	0.69	98.17	22.2	9.85	13.82	11.71	9.34	14.91	13.08	36.8	30.51	0.97	2.7	27.52	2.2	1.18	2.17	2.62	4.25	3.71	6.68	3.45
GiantSalamander_f32p60_2857_transcript21095_g1	PREDICTED: plasminogen isoform X2 [Alligator mississippiensis]	0	0	0	0	0.04	0	0	0	0.02	0	0.2	0	812.65	119.58	138.8	12.69	454.81	139.4	0.12	0	0.07	0.02	0	0	0	0	0.02	0	0	0	0.08	0.02	0	0	0	0	0	0	0	0.18	0.05
GiantSalamander_f15p60_782_transcript13826_g1	lectin, galactose binding, soluble 3, isoform CRA_b [Mus musculus]	0.11	0	0	0	4.33	0	0	12.25	0	0.07	0.29	0	0	0	0	0.12	0	0.94	66.97	121.07	75.69	68.26	602.47	100.84	0	2.15	0	1.5	5.93	1.34	0	3.49	0	9.16	6.21	177.99	115.54	50.31	231.98	808.43	179.06
GiantSalamander_f7p60_2480_transcript23413_g1	PREDICTED: protein-glutamine gamma-glutamyltransferase E-like [Pelodiscus sinensis]	0.37	0.19	0.11	0.06	0.08	0.11	0.05	0.06	0.01	0.03	0	0.08	0	0.01	0	0	0.01	0.27	56.9	41.72	52.72	2.46	0.92	3.71	33.68	62.68	45.91	11.35	13.58	31.36	807.49	583.17	404.43	66.38	127.7	7.02	13.27	18.18	7.73	1.39	2.93
GiantSalamander_f16p60_1099_transcript29155_g1	PREDICTED: nmrA-like family domain-containing protein 1 [Monodelphis domestica]	25.68	31.91	23.81	35.6	29.76	37.96	34.47	7.93	8.47	34.84	24.09	26.12	118.59	110.43	124.02	48.02	92.54	115.94	150.36	144.69	164.22	54.05	64.99	100.62	107.38	115.5	141.41	106.4	90.31	94.76	577.81	553.11	532.16	256.36	599.94	154.69	117.31	228.49	143.58	166	82.37
GiantSalamander_f2p41_2231_transcript24908_g1	NADH dehydrogenase subunit 4 [Andrias davidianus]	122.5	8.57	63.2	232.38	173.91	121.66	128.04	156.58	137.75	177.13	22.85	157.05	57.52	55.24	38.15	55.15	70.4	64.66	57.93	48.53	42.14	101.9	92.3	34.69	51.23	52.83	61.53	98.18	70.59	92.41	103.58	155.53	49.47	265.26	104.74	68.55	48.03	55.36	35.08	41.09	40.86
GiantSalamander_f13p60_873_transcript13628_g1	Transcription factor BTF3, partial [Ophiophagus hannah]	534.96	569.17	577.82	529.61	553.47	600.98	554.14	274.18	193.51	713.53	675.16	574.83	160.73	143.21	251.51	147.15	219.59	203.18	422.83	503.63	474.19	439.16	447.39	658.04	418.2	410.76	436.87	397.47	407.57	421.52	370.81	371.55	558.34	275.59	458.8	517.36	507.91	517.39	609.67	650.2	642.41
GiantSalamander_f4p60_1806_transcript27058_g2	PREDICTED: tubulin beta-3 chain [Otolemur garnettii]	443.69	512.55	356.54	766.73	797.3	755.8	0.17	0.61	0.38	0.05	0.26	0.19	0.17	0.12	0.27	0.04	0.07	0.06	0.56	0.51	2.25	19	0.69	2.38	0.26	0.35	0.31	0.29	0.32	0.34	0.11	0.06	0.13	0.2	0.22	0.42	0.58	0.31	0.18	0.29	0.8
GiantSalamander_f11p60_3957_transcript16727_g1	thyroid hormone down-regulated protein (gene 18) precursor [Xenopus laevis]	0.24	0.45	0.36	0.43	0.05	0.21	0.4	0.5	0.07	1.07	0.09	0.28	0.09	0.35	0.37	0.72	0.11	0.32	270.05	545.69	74.32	94.51	5.37	33.09	220.56	566.72	143.56	6.63	6.67	51.74	162.33	486.59	86.64	20.33	40.58	238.83	793.34	74.68	89.56	0.24	122.68
GiantSalamander_f2p60_492_transcript30657_g1	RecName: Full=Fatty acid-binding protein 2, liver; AltName: Full=Liver basic FABP; Short=LB-FABP; AltName: Full=Liver-type fatty acid-binding protein; Short=L-FABP	0	0	0.29	0	0.06	0	0	1.31	1.66	0.82	0	2.54	46.73	68.02	224.11	792.83	103.87	108.07	0	0.32	0	0.23	0	0	0	0	0	0	0	0.21	0	0	0	0	0	0	0	0	0	0	0
GiantSalamander_f3p60_550_transcript14248_g1	Unknown (protein for MGC:189640) [Xenopus tropicalis]	0	0	0	0	0.39	0	0.08	0	0	0.08	0	0	0	0	0	0	0	0.76	41.43	0	59.97	784.51	0.52	144.92	57.55	53.01	59.79	67.17	220.65	133.5	0.1	0	0.09	0	0	2.63	0	0	0	0	0
GiantSalamander_f40p60_2203_transcript24987_g1	PREDICTED: plasma protease C1 inhibitor [Pelodiscus sinensis]	9.01	10.77	6.03	6.18	4.53	3.78	10.11	8.11	5.33	9.34	11.33	6.34	279.2	256.8	296.29	783.57	228.18	453.27	1.17	0.68	4.59	1	3.13	0.93	10.84	7.61	10.69	7.1	15.75	9.74	1.51	1.07	2.53	4.38	4.38	1.05	0.86	1.92	0.44	2.07	2.95
GiantSalamander_f12p60_3598_transcript1764_g1	fibrinogen gamma chain precursor [Xenopus laevis]	0	0.1	0.06	0	0.2	0.09	0.12	0.09	0.16	0.07	0.53	0.05	377.92	505.34	540.48	398.54	405.25	782.58	0.18	0.54	0.25	0.02	0.02	0.06	0	0	0.07	0	0.01	0	0	0	0	0	0.25	0.07	0.02	0	0.07	0.28	0.23
GiantSalamander_f91p60_2680_transcript21413_g1	PREDICTED: dihydropyrimidinase [Monodelphis domestica]	0.07	0.06	0.12	0.11	0.06	0.22	0.5	0.01	0.04	0.03	0.39	0.03	663.87	782.1	407.54	47.83	587.24	469.82	3.45	3.45	2.66	4.62	1.44	1.94	0.83	0.71	0.78	0.5	0.79	0.62	0.01	0.12	0.05	0.05	0.08	7.69	8.88	6.77	2.99	6.3	2.51
GiantSalamander_f6p60_3039_transcript3681_g1	PREDICTED: keratin, type II cytoskeletal 75-like, partial [Acinonyx jubatus]	0	0.29	0	0	0	0	0	0	0	0	0.28	0.03	0	0	0	0	0	0.17	0.05	1.9	0.62	0.21	780.45	146.01	0.05	0.52	1.63	0.82	1.66	2.26	0	0	0	6.01	6.74	0.11	1.36	0	1.58	84.27	527.41
GiantSalamander_f9p60_824_transcript29848_g1	PREDICTED: mannan-binding lectin serine protease 2 isoform X2 [Chrysemys picta bellii]	0	0.05	0.05	0.06	0.05	0	0.17	0	0.03	0	0.4	0	253.7	229.07	308.49	279.68	384.93	404.14	0.11	0.07	0.1	0.03	0	0	0.03	0	0.03	0	0	0	0	0.05	0.04	0	0.21	0	0	0.04	0	0.09	0
GiantSalamander_f21p60_1444_transcript28227_g1	PREDICTED: MARCKS-related protein [Latimeria chalumnae]	505	519.13	433.99	444.92	334.94	778.77	29.39	13.21	6.85	27.97	16.24	26.74	20.16	20.93	14.26	9.44	5.61	14.45	70.48	69.92	54.59	21.91	35.77	48.04	48.48	37.43	23.77	26.17	19.03	35.13	37.19	41.19	46.25	31.77	49.38	101.79	92.35	54.84	42.27	20.69	99.8
GiantSalamander_f8p60_1473_transcript28039_g1	eukaryotic translation initiation factor 5a-1 [Ictalurus punctatus]	393.55	436.55	378.15	352.67	341.44	333.18	472.7	184.22	149.37	387	327.04	378.57	249.57	261.47	257.75	104.32	347.75	241.51	559.78	567.21	691.77	535.51	597.38	634.55	506.61	523.3	543.89	707.19	692.48	648.59	498.14	489.84	714.57	334.31	548.44	543.2	614.07	778.09	651.66	752.79	694.86
GiantSalamander_f2p60_432_transcript30838_g3	.	0.58	0.5	0	0.23	2.26	0.95	0.78	71.31	0	0	0	0	0.27	0	0.35	0.41	0.5	0.38	268.03	152.85	774.97	13.24	306.21	75.19	4.16	2.87	0.78	4.83	1.68	1.39	0.16	4.05	6.63	11.09	7.09	407.54	126.56	347.21	21.49	21.46	71.16
GiantSalamander_f3p35_2139_transcript9169_g1	PREDICTED: alanine--glyoxylate aminotransferase 2, mitochondrial [Alligator mississippiensis]	1.27	1.21	1.15	0.79	0.08	0.27	0.23	0	0.05	0.08	0.06	0	488.35	774.49	42.13	26.06	64.08	256.81	1.98	2.82	0.32	1.89	0.3	1.27	1.1	1.33	0.17	1.03	0	1.15	0.14	0.14	0	0.17	0.05	2.75	4.58	0	1.16	0	1.76
GiantSalamander_f4p52_3223_transcript19014_g1	PREDICTED: alpha-tectorin-like, partial [Chelonia mydas]	2.6	0.92	0.54	0.13	0.24	0.43	0.12	0.18	0.07	0.07	0.13	0.18	0.01	0.01	0.01	0	0.08	0.09	773.67	672.16	32.72	18.48	51.01	286.77	256.46	435.33	141.68	15.5	2.85	179.59	92.67	95.96	14.32	3.66	27.34	3.14	3.99	13.72	3.27	0.76	6.1
GiantSalamander_f4p60_2951_transcript20420_g1	CR1-3 [Lycodichthys dearborni]	0.04	0.08	0.08	0.05	0.2	0.09	0.03	0.08	0.14	0.09	0.03	0.01	0.02	0.1	0.01	0	0.02	0	23.38	4.3	6.98	0.26	464.91	85.26	488.63	341.84	773.4	277.37	394.17	166.51	0.03	0	0.03	0.02	0	0.09	0.06	0.42	1.09	1.89	0.86
GiantSalamander_f65p60_1801_transcript10372_g1	translation initiation factor eIF4A II [Xenopus laevis]	636.15	649.51	610.86	623.4	506.97	773.15	467.93	176.38	129.91	560.37	430.6	412.48	223.83	211	316.06	288.64	277.5	277.75	499.03	505.7	610.75	495.93	489.43	674.42	487.8	504.93	535.39	580.39	524.03	596.93	607.46	630.63	676.09	398.59	655.74	559.31	499.39	634.88	718.87	667.53	713.98
GiantSalamander_f97p60_1390_transcript12175_g1	actin, aortic smooth muscle [Xenopus tropicalis]	11.37	12.25	15.6	21.3	12.82	6.83	5.61	1.5	5.72	9.02	36.56	4.24	31.12	12.26	74.38	14.05	8.85	15.33	101.67	109.67	113.29	191.07	377.48	99.31	19.77	18.59	17.54	67.96	110.96	54.65	110.24	140.5	126.77	174.24	95.26	533.48	263.59	228.74	513.9	484.14	437.49
GiantSalamander_f89p60_1939_transcript9909_g1	lumican precursor [Xenopus tropicalis]	163.08	177	124.15	150.98	41.88	67.47	63.63	13.95	7.87	42.05	31.18	35.93	30.26	34.37	24.63	5.67	20.63	11.83	284.64	232.18	252.63	654.25	46.11	219.05	386.59	366.24	318.26	299.25	568.22	266.21	96.1	110.21	91.82	38.98	33.19	479.9	770.44	437.99	257.22	280.75	119.89
GiantSalamander_f3p60_1408_transcript12208_g1	keratin 18 [Xenopus laevis]	1.61	1.04	1.48	1.15	1.18	3.47	0.14	0.38	0.01	0.07	0.03	0.06	7.05	0.55	1.36	0.71	0.51	3.44	15.83	20.47	25.66	17.41	45.36	14.56	5.35	3.55	2.81	10.8	4.34	5.71	495.43	520.23	429.01	293.03	561.2	82.86	36.52	43.12	97.28	54.38	49.51
GiantSalamander_f21p60_1645_transcript27556_g1	PREDICTED: fructose-bisphosphate aldolase B isoform X1 [Anolis carolinensis]	34.44	46.75	56.34	33.27	24.31	28.73	50.38	33.61	20.94	78.39	57.24	37.25	359.15	326.51	507.97	313.16	639.71	768.95	270.65	217.2	155.74	158.19	232.31	179	165.53	151.92	111.73	108.52	129.43	100.57	163.89	204.22	97.48	161.7	169.13	373.05	258.69	153.76	289.2	171.62	369.09
GiantSalamander_f2p45_4454_transcript16075_g1	PREDICTED: myosin-7B [Xenopus tropicalis]	0.65	0.58	0.54	0.86	0.76	0.48	206.13	764.22	467.47	192.66	191.78	150.41	0.03	0.04	0.02	0.02	0.01	0.08	8.81	0.15	18.17	53.21	9.09	41.38	55.94	57.28	53.22	43.84	54.41	85.34	0.91	3.02	2.14	11.94	3.19	9.59	0.09	0.03	0	0.01	0.09
GiantSalamander_f3p48_1924_transcript26516_g1	carnosine dipeptidase 1 (metallopeptidase M20 family) [Xenopus tropicalis]	1.4	1.74	0.1	0.27	0.68	0.3	0.47	0	0.38	0	1.75	0.22	710.52	539.93	588.55	430.63	760.93	650.42	15.01	10.79	8.65	18.01	13.74	13.76	25.8	15.33	15.66	16.99	24.31	15.14	10.81	6.38	8.55	8.76	7.71	28.47	13.53	13.66	24.95	36.02	17.12
GiantSalamander_f10p60_3906_transcript16927_g1	thyroid hormone down-regulated protein (gene 18) precursor [Xenopus laevis]	0.54	0.14	0.35	0.29	1.26	0.32	0.67	0.67	0.49	0.65	0.83	0.76	0.33	0.17	0.2	0.51	0.63	0.72	756.76	339.15	45.26	62.03	65.76	136.82	571.32	369.28	92.27	20.67	44.12	150.11	395.86	317.56	48.95	230.72	178.43	742.2	514.07	45.56	62.58	0.65	567.92
GiantSalamander_f15p60_3297_transcript18712_g1	Keratin, type II cytoskeletal 75, partial [Phoenicopterus ruber ruber]	0	0.61	0	0.04	1.82	0	0.03	0.17	0.41	0.03	0	0.03	0	0	0	0	0	0	2.16	136.91	13.64	10.99	29.01	457.96	1.51	19.6	35.45	72.79	38.03	40.21	0	3.79	0.05	3.13	2.36	7.05	119.76	178	753.94	266.82	316.53
GiantSalamander_f4p39_3020_transcript3756_g1	PREDICTED: SURP and G-patch domain-containing protein 2 isoform X2 [Aquila chrysaetos canadensis]	448.26	461.96	451.25	386.05	300.8	427.97	338.13	149.75	83.99	319.23	251.64	274.7	156.48	126.01	236.68	253.28	208.35	163.59	510.43	498.72	494.49	339.35	397.88	581.58	416.89	366.34	441.7	383.79	323.29	390.19	497.42	541.46	676.72	354.32	591.89	568.09	492.84	557.67	521.91	669.95	752.66
GiantSalamander_f2p55_1524_transcript28017_g1	PREDICTED: visinin-like protein 1 [Chrysemys picta bellii]	354.16	428.77	394.88	644.62	752.62	441.06	0.23	0.34	0.22	0.37	0.37	0.37	0.78	1.07	0.72	0.35	1.63	0.46	0.43	0.34	2.37	15.59	0.49	1.65	0.31	0.09	0.18	0.37	0.26	0.31	0.39	0.37	0.5	0.47	0.16	1.15	1.02	0.76	0.55	0.6	1.02
GiantSalamander_f4p60_991_transcript13393_g1	mitochondrial cytochrome c oxidase subunit Va, partial [Spea multiplicata]	174.53	179.53	89.02	186.03	144.34	207.26	511.43	153.73	44.84	752.32	244.45	567.12	158.04	153.76	126.38	69.11	38.45	131.82	235.93	252.92	146.8	141.74	80.66	204.32	296.94	335.09	175.05	139.69	131.27	275.91	447.31	456.1	293.8	119.49	466.13	232.58	247.08	188.59	263.8	106.76	207.52
GiantSalamander_f2p39_1682_transcript27480_g1	PREDICTED: three prime repair exonuclease 2-like [Xenopus tropicalis]	6.58	6.1	2.64	7.38	6.69	8.65	24.36	9.61	3.1	15.37	11.05	12.63	6.75	4.13	4	12.9	6.7	11.86	185.22	130.06	62.74	99.01	360.82	367.81	234.23	152.18	81	113.96	93.27	153.74	38.67	45.43	16.49	29.4	86.29	243.96	109.65	77.48	493.93	198.35	632.41
GiantSalamander_f5p60_4117_transcript853_g1	PREDICTED: neuron-specific protein family member 2 [Anser cygnoides domesticus]	656.05	715.08	654.92	680.06	450.77	748.67	0.02	0.09	0	0	0.08	0.09	0.04	0.04	0.01	0	0.01	0	0.27	0.22	1.14	5	0.29	0.49	0.25	0.27	0.18	0.27	0.05	0.04	0	0	0.07	0.09	0.03	0.26	0.28	0.13	0.17	0.29	0.58
GiantSalamander_f2p13_4222_transcript16290_g1	Ouroboros 1, partial [Hynobius retardatus]	2.69	3.16	3.21	2.26	3.34	1.83	1.14	0.67	0.47	1.99	0.92	1.27	0.02	0.02	0.02	0.01	0.12	0.08	665.54	747.42	337.61	87.23	68.87	261.12	276.39	335.22	123.48	8.85	5.27	47.55	71.22	163.03	130.32	95.13	99.48	433.23	698.3	287.87	22.33	6.77	58.22
GiantSalamander_f2p21_2540_transcript6827_g1	KHDRBS1 protein [Homo sapiens]	650.86	746.66	717.44	577.07	287.11	570.32	213.59	114.08	98.61	164.48	137.16	143.57	122.23	109.11	148.65	259.19	106.78	114.49	340.36	284.02	376.12	192.31	179.67	284.53	250.58	226.28	225.44	190.43	170.58	197.88	315.14	353.82	348.8	175.7	274.13	422.99	308.77	338.27	248.63	264.05	321.75
GiantSalamander_f2p60_1515_transcript28063_g1	PREDICTED: WAP four-disulfide core domain protein 5-like [Pelodiscus sinensis]	0.1	0.01	0.07	0	3.6	0.14	0	0.01	0	0	0.24	0.03	0.04	0	0.02	0.09	0	0.16	32.89	22.92	13.97	33.11	712.42	310.04	75.56	62.29	114.5	159.95	100.6	106.06	0	0.27	0.41	6.89	2.42	10.36	0.72	51.78	557.99	646.61	418.06
GiantSalamander_f114p60_2741_transcript5049_g1	fibrinogen alpha chain precursor [Xenopus laevis]	0.02	0	0	0	0.02	0	0.11	0.28	0.06	0	0	0	26.86	243.65	331.62	38.77	45.54	490.18	0.01	0.03	0.12	0.06	0	0.01	0	0.02	0.03	0	0	0	0	0	0	0.14	0.09	0	0	0	0	0	0.01
GiantSalamander_f2p27_2003_transcript26083_g1	kunitz-type protease inhibitor 2 precursor [Xenopus tropicalis]	1.43	0	1.79	0.52	53.91	13.04	15.62	9.67	4.54	6.96	12.55	11.85	0	0	10.82	3.93	0.33	2.03	3.03	138.95	8.71	30.09	182.96	235.98	3.5	4.18	4.93	3.79	1.73	5.75	6.05	3.66	278	394.97	743.9	2.12	17.16	49.35	312.69	244.92	417.01
GiantSalamander_f2p16_2713_transcript22104_g1	PREDICTED: protein-glutamine gamma-glutamyltransferase E-like [Chrysemys picta bellii]	0	0	0.02	0	0.45	0	0	0	0.14	0	0.44	0	0	0	0	0	0	0.06	0.22	0	0.13	0	106.44	1.65	0.07	0.07	0	0.14	0.15	0	0	0	1.82	0.05	0.72	0	0.08	0	5.5	109.59	155.81
GiantSalamander_f34p60_2383_transcript23992_g1	golli protein J37.1 [Xenopus laevis]	70.17	163.4	678.77	148.7	742.8	37.3	0.5	0	0.1	0	0.35	0.07	0.19	0.09	0.26	0	0.19	1.16	87.22	26.01	125.61	269.98	80.2	140.08	184.94	205.08	199.28	180.1	213.91	218.75	3.24	6.93	6.15	24.96	9.32	41.94	38.65	26.02	15.55	41.26	34.82
GiantSalamander_f3p17_2071_transcript25957_g1	keratin-3, type I cytoskeletal 51 kDa [Xenopus laevis]	0	0	0	0	0	0	0	0	0	0	0	0	0	0	0	0.02	0	0	0.24	0	0.33	0.11	29.22	0.56	0.23	0	0.61	0.96	0.42	0.1	0	0	0	0	0	0.02	0	0.07	0.49	1.47	9.58
GiantSalamander_f2p48_732_transcript13964_g1	.	2.79	0	0	2.31	3.39	3.76	4.79	0.85	5.34	3.98	3.86	3.26	447.51	322.84	649.57	527.99	375.63	546.6	1.91	0.26	0.04	1.29	5.33	3.39	2.33	0.09	0.35	1.74	2.04	1.81	6.35	4.71	6.5	23.91	19.39	2.89	0.04	0	2.49	3.5	5.99
GiantSalamander_f2p34_2523_transcript23031_g1	larval type I keratin [Rana catesbeiana]	1.15	0.24	1.39	0.57	0.55	0.12	0	0	0	0.12	0	0.07	0.37	0	0.14	0.21	0.23	0.22	740.22	550.24	599.28	222.42	110.01	589.05	300.09	110.16	170.81	13.37	3.43	54.49	203.51	66.6	638.67	296.5	533.57	553.14	580.51	471.81	170.82	0.69	685.43
GiantSalamander_f19p60_2034_transcript9672_g1	PREDICTED: 2-acylglycerol O-acyltransferase 1-like isoform X1 [Stegastes partitus]	1.2	1.13	0.37	0.81	0.59	0.18	0.46	0.05	0.1	1.13	0.56	0.09	232.73	214.98	270.4	646.54	209.45	283.57	4.43	2.61	1.57	20.09	29.25	2.26	0.42	0.13	0.2	0.26	0.35	0.46	0.31	0.19	0.31	0.63	0.65	0.73	0.95	0.66	1.2	1.8	1.8
GiantSalamander_f9p60_658_transcript30262_g1	macrophage migration inhibitory factor [Andrias davidianus]	334.9	364.99	311.99	367.6	420.44	481.35	301.32	136.38	130.18	543.59	431.2	419.78	294.97	286.84	433.48	513.29	274.35	372.73	242.49	315.36	276.34	227.28	370.85	467.35	245.35	287.04	261.37	273.05	286.19	294.53	269.33	305.75	495.59	305.67	447.15	338.44	311.24	310.07	338.19	360.28	533.34
GiantSalamander_f13p60_589_transcript30345_g1	PREDICTED: cytochrome b-c1 complex subunit 6, mitochondrial isoform X1 [Condylura cristata]	147.02	131.08	106.85	263.99	342.23	298.61	315.89	186.36	175.23	732.89	577.24	481.99	105.7	109.73	169.4	197.34	120.23	135.59	105.02	131.41	166.16	136.41	158.6	182.46	151.01	170.8	150.29	243.51	187.07	207.14	166.06	174.61	272.78	152.53	300.48	133.57	101.54	186.35	215.54	226.88	206.8
GiantSalamander_f56p60_2440_transcript23496_g1	tissue inhibitor of metalloproteinase 1 [Notophthalmus viridescens]	46.16	63.27	28.22	25.3	9.71	20.83	575.67	291.8	67.67	579.78	165.96	481.05	40.44	47.37	28.11	46.04	9.6	58.98	125.34	81.44	180.44	33.84	18.52	50.62	47.37	45.63	18.2	21.73	24.31	79.94	56.24	66.51	24.79	20.55	48.3	49.19	45.53	27.25	34.24	14.79	47.92
GiantSalamander_f2p60_627_transcript14225_g2	uncharacterized protein LOC100127850 [Xenopus tropicalis]	10.38	10.67	10.23	61.61	106.47	63.55	278.78	115.95	91.86	733.04	546.74	483.49	35.88	35.44	43.34	52.31	76.1	80.5	12.55	14.92	22.52	122.02	64.55	128.65	70.83	78.99	52.03	138.85	147.43	147.46	11.9	14.7	17.14	46.35	62.29	22.75	16.02	14.07	102.19	89.69	92.16
GiantSalamander_f2p14_5758_transcript118_g1	PREDICTED: mucin-2-like [Astyanax mexicanus]	1.33	0.25	0.04	0.14	0.45	0.1	0.03	0.3	0.08	0.02	0	0.01	0.01	0.03	0.02	0.03	0.08	0.12	616.64	732.07	22.33	133.74	55.51	161.21	425.1	554.83	162.38	21.6	21.73	168.01	174.93	220.14	19.35	45.3	41.35	354.22	565.13	29.85	204.64	0.2	90.88
GiantSalamander_f4p60_462_transcript30748_g1	small nuclear ribonucleoprotein G [Gallus gallus]	332.68	382.54	310.89	264.55	323.57	351.06	373.75	256.76	257.32	423.58	372.76	365.43	133.36	123.98	217.44	207.02	214.21	146.19	349.63	430.61	419.67	280.81	384.25	486.51	416.47	394.66	412.52	470.02	490.1	394.07	359.87	368.01	727.13	381.48	731.02	467.8	425.34	549.95	486.65	731.52	548.56
GiantSalamander_f7p60_1993_transcript26140_g1	PREDICTED: keratin-associated protein 5-1-like [Serinus canaria]	0.1	0.05	0.18	0.3	0.91	0	0.05	0.16	0	0.09	0.22	0	0.11	0.09	0	0	0.1	0	182.12	83.29	76.87	96.61	78.27	253.56	468.63	401.56	730.12	663.42	579.52	474.94	0.12	0.1	0.03	1.2	0.54	81.59	9.25	156.53	455.87	175.44	50.45
GiantSalamander_f4p60_1139_transcript12979_g1	PREDICTED: transmembrane protein 176A [Chrysemys picta bellii]	29.83	23.88	22.5	28.64	56.59	30.92	95.1	61.07	27.86	114.99	93.04	100.45	60.97	34.95	59.96	33.26	60.49	62.81	124.26	115.71	25.26	61.54	53.91	127.08	73.2	56.17	24.7	34.9	31.02	60.71	165.84	106.89	129.97	251.66	291.85	103.29	109.82	30.84	91.05	46.38	153.58
GiantSalamander_f5p60_2087_transcript25717_g1	PREDICTED: protein arginine N-methyltransferase 1 isoform X1 [Xenopus tropicalis]	677.71	725.67	685.04	695.51	619.65	700.71	560.09	269.02	177.07	597.27	509.42	499.36	188.34	155.67	254.9	348.26	217.85	187.15	516.44	525.69	540.31	365.92	301.24	498.36	424.55	391.72	417.59	374	356.23	405.39	475	474.98	573.57	290.57	455.21	585.11	549.72	594.36	476.2	619.57	603.82
GiantSalamander_f10p60_1136_transcript13069_g1	ATP synthase, H+ transporting, mitochondrial F1 complex, gamma polypeptide 1 [Xenopus laevis]	68.43	74.76	70.96	64.03	33.09	54.41	526.88	131.68	95.17	723.71	521.78	516.47	179.41	145.81	151.75	164.75	315.87	217.09	140.33	102.54	164.29	337.36	125.29	270.31	250.16	230.14	238.89	448.26	480.1	392.15	100.94	101.53	97.11	48.99	72.07	172.36	129.84	167.54	279.05	372.4	151.67
GiantSalamander_f5p60_372_transcript15017_g1	PREDICTED: glutathione S-transferase P [Ochotona princeps]	0	0	1.04	0	0	0	0.25	0	0	0	0	0	199.84	0	397.85	0	174.59	0.21	24.96	0	26.82	0.11	36.6	0	12.74	0	26.06	7.13	8.25	0	32.44	0	62.76	95.52	0	16.07	0	32.62	0	19.04	0
GiantSalamander_f20p60_582_transcript30673_g1	PREDICTED: 10 kDa heat shock protein, mitochondrial isoform X2 [Fukomys damarensis]	210.46	211.39	175.52	200.56	216.3	248.55	370.58	214.37	171.9	641.42	538.12	564.37	373.04	393.32	718.61	292.36	361.59	310.62	133.42	134.02	285.11	101.63	165.9	133.95	161.58	183.62	205.97	233.64	237.68	210.57	215.51	241.11	467.48	234.15	474.61	143.64	146.89	298.57	166.85	287.25	189.49
GiantSalamander_f3p24_4246_transcript16278_g1	PREDICTED: antithrombin-III [Calypte anna]	0.93	0.88	1.42	1.37	1.01	1.46	2.25	0.82	0.68	2.06	1.2	1.68	593.92	715.74	282.46	93.99	306.22	653.7	2.04	1.36	1.64	2.07	0.61	0.75	1.32	1.62	1.24	0.72	0.51	0.68	0.64	0.59	0.54	0.21	0.2	3.34	0.62	0.48	0.24	1.22	0.24
GiantSalamander_f9p60_3191_transcript3000_g1	actinin, alpha 3 (gene/pseudogene) [Xenopus laevis]	1.17	0.6	0.43	1.27	6.26	0.92	155.59	155.38	101.31	261.27	271.49	199.48	0.19	0.09	0.05	0.77	0.13	11.69	48.17	0.19	92.91	713.15	57.51	301.27	107.18	122.99	95.2	110.98	195.59	195.73	2.41	7.72	5.49	14.74	3.65	11.46	0.26	0.31	0.17	0.16	1.52
GiantSalamander_f4p50_4187_transcript828_g1	B2 keratin [Xenopus laevis]	0.35	0.16	0.34	0.06	0.36	0.1	0.04	0.26	0.1	0.04	0	0.03	0.01	0.04	0.02	0.03	0.03	0.1	265.6	387.49	267.24	47.49	36.65	144.63	69.19	72.07	37.82	6.67	2.61	22.94	30.79	27.69	26.14	7.37	17.41	333.97	709.51	289.06	48.38	10.35	121.83
GiantSalamander_f41p60_1004_transcript13283_g1	PREDICTED: peptidyl-prolyl cis-trans isomerase FKBP3 [Cavia porcellus]	398.12	362.9	375.49	194.66	182.88	240.27	535.64	146.72	101.95	383.62	257.88	302.91	312.52	307.81	380.4	114.93	314.87	191.25	425.2	400.46	557.03	339.19	163.34	252.16	451.32	461.02	480.54	428.68	467.21	388.12	449.65	438.87	708.73	125.49	247.89	390.81	450.75	601.92	323.16	498.8	247.35
GiantSalamander_f5p60_987_transcript13347_g1	PREDICTED: coiled-coil-helix-coiled-coil-helix domain-containing protein 10, mitochondrial isoform X2 [Chrysemys picta bellii]	122.39	123.41	133.22	69.85	104.06	86.92	502.38	337.37	206.09	598.59	525.37	454.77	183.96	182.47	324.44	148.37	148.83	181.37	129.62	146.71	157.23	92.88	116.9	147.12	161.54	167.64	165.76	136.84	124.05	139.39	173.46	173.27	247.28	98.93	189.92	156.21	128.42	174.11	120.95	120.11	129.15
GiantSalamander_f4p57_3320_transcript18580_g1	PREDICTED: inter-alpha-trypsin inhibitor heavy chain H4 [Chelonia mydas]	0	0.1	0	0	0	0	0.19	0.06	0.24	0	0.86	0	248.58	473.2	194.59	25.21	707.13	479.74	0.16	0.09	0	0	0	0	0	0	0.14	0	0	0	0.03	0	0	0.02	0.22	0	0.11	0	0	0	0
GiantSalamander_f2p60_1613_transcript27751_g1	fibrinogen gamma chain precursor [Xenopus laevis]	0	0	0	0.07	0.16	0	1.16	0	0	0.12	0.66	0	704.47	63.21	52.67	372.36	579.92	74.48	0.21	0.06	0	0.03	0.19	0	0	0	0	0	0.04	0	0.07	0.07	0	0.03	0.08	0.17	0.04	0	0.26	0.95	0.11
GiantSalamander_f12p60_1383_transcript12173_g1	RNA binding motif protein, X-linked isoform B [Alligator mississippiensis]	403.49	439.06	377.18	376.71	207.24	431.9	213.82	43.3	28.18	270.22	138.84	200.34	125.44	120.32	179.75	87.3	147.4	119.56	377.57	375.82	543.43	208.09	120.8	320.76	363.47	387.05	414.9	399.51	360.12	408.82	526.73	524.35	703.95	155.06	366.86	458.16	392.39	565.93	309.02	355.25	246.84
GiantSalamander_f2p60_1769_transcript10884_g1	RecName: Full=Argininosuccinate lyase; Short=ASAL; AltName: Full=Arginosuccinase	27.73	20.32	23.41	10.12	13.85	17.77	6.85	3.96	3.34	4.42	4.64	3.24	486.69	562.02	703.87	395.59	334.48	422.51	114.84	113.75	141.7	31.07	106.66	76.5	95.29	110.6	116	73.97	55.51	67.32	134.18	120.22	155.31	51.39	81.23	114.93	109.9	160.04	93.5	103	88.24
GiantSalamander_f15p60_1315_transcript12519_g1	annexin A1 [Xenopus laevis]	5.37	6.4	4.01	7.91	5.32	1.94	31.18	7.21	6.21	28.57	19.67	21.06	5.6	5.6	9.38	2.59	4.41	4.5	510.99	450.91	427.87	289.52	285.18	322.27	537.34	499.05	518.26	653.66	700.68	603.88	212.79	218.45	253.66	137.79	178.53	542.89	631.79	558.71	407.08	615.53	441.48
GiantSalamander_f3p60_504_transcript30654_g3	PREDICTED: protein FAM183A [Xenopus tropicalis]	32.24	54.19	27.45	59.83	146.21	64.58	120.82	147.64	153.55	357.98	286.8	277.04	34.22	58.7	55.71	214.83	87.01	77.51	84.34	251.49	89.34	130.09	511.64	436.32	86.82	180.63	75.71	1.08	197.75	177.45	81.7	175.85	168.52	566.96	697.73	106.86	206.91	108	362.5	445.81	645.47
GiantSalamander_f4p60_1672_transcript27492_g1	PREDICTED: reticulon-4 isoform X2 [Ailuropoda melanoleuca]	356.58	343.25	350.52	443.6	695.65	516.27	271.88	132.42	72.95	268.74	239.73	295.24	93.4	84.64	113.78	36.14	132.3	83.11	109.81	114.25	145.97	164.8	71.53	107.95	134.15	146.78	129.33	123.38	98.96	125.87	93.42	109.05	179.75	80.03	160.1	79.76	91.81	137.17	93.41	106.88	105.03
GiantSalamander_f22p60_1535_transcript11651_g1	RecName: Full=Tubulin alpha chain	157.16	176.36	163.52	117.55	81.75	132.24	160.84	37.85	25.06	113.67	52.29	76.08	82.92	83.24	78.38	19.83	34.25	54.23	525.07	399.41	694.71	266.46	109.99	287.37	460.88	446.95	487.4	366.14	301.96	343.83	287.27	307.94	320.81	70.73	97.35	489.97	368.52	578.94	400.42	197.86	142.36
GiantSalamander_f8p60_1578_transcript27805_g1	PREDICTED: glutathione S-transferase theta-1-like [Lepisosteus oculatus]	3.07	2.06	2.07	1.51	1.19	2.54	1	0.22	0.28	0.53	0.98	0.18	636.69	588.89	515.42	295.45	417.07	473.2	2.76	0.93	3.9	17.8	1.68	2.92	12.39	2.94	6.12	5.55	17.08	16.68	0.98	1.38	1.38	0.73	1.31	1.99	1.25	2.1	1.13	1.33	2.32
GiantSalamander_f20p60_4097_transcript908_g1	RecName: Full=Excitatory amino acid transporter 1; AltName: Full=SEAAT1	478.71	529.43	545.43	576.78	513.74	560.25	0.02	0.08	0.01	0.01	0.03	0.05	0.06	0.05	0	0	0.01	0.02	0.5	0.03	3.76	9.12	0.36	0.72	0.03	0.05	0.05	0.11	0	0.05	0.03	0.02	0.12	0.06	0.03	0.4	0.56	0.19	0.15	0.22	0.7
GiantSalamander_f2p31_4088_transcript16550_g1	PREDICTED: hippocalcin-like protein 4 [Gekko japonicus]	500.18	632.38	641.17	682.02	429.13	500.51	1.25	1.86	1.21	0.59	0.9	0.57	0.58	0.54	0.82	1.33	0.35	0.66	1.4	0.8	2.46	10.18	1.26	1.26	0.79	0.91	0.53	0.71	0.34	0.54	4.56	6.37	2.25	5.15	7.74	1.28	0.66	0.71	0.48	0.4	1.58
GiantSalamander_f5p60_1036_transcript29323_g2	myosin light chain 10 [Xenopus tropicalis]	0.84	0.46	0.96	1.17	4.63	0.97	9.83	0.47	0.14	3.98	0.5	0.39	0.06	0.11	0.15	0.16	0.02	0.13	67.8	0.79	118.54	681.39	23.84	214.93	332.55	292.29	252.65	401.79	519.59	496.45	5.69	18.38	14.42	32.14	13.37	85.69	0.88	0.18	0.12	0.13	0.59
GiantSalamander_f2p8_4216_transcript916_g1	PREDICTED: uncharacterized protein LOC100485162 [Xenopus tropicalis]	0.09	0.16	0.02	0.01	0.11	0.04	0.04	0.05	0.01	0.03	0	0.09	0.9	0.04	0.03	0.07	0.09	0.06	57.15	50.37	43.22	3.44	2.49	14.97	47.6	68.83	67.51	13.06	4.12	28.77	680.05	653.8	515.95	159.86	281.17	19.12	42.52	54.23	11.67	0.39	10.19
GiantSalamander_f9p60_981_transcript29455_g2	PREDICTED: protein DJ-1 [Chelonia mydas]	384.2	435.97	419.53	492.17	507.67	551.07	253.75	76.48	48.12	287.48	229.23	211.19	97.89	102.92	140.6	31.38	104.93	100.36	78.91	72.55	97.28	180.41	69.02	113.05	87.6	80.13	66.2	103.37	120.24	119.81	47.4	45.38	56.59	33.01	43.28	90.33	69.3	63.46	77.2	88.59	74.44
GiantSalamander_f2p13_1734_transcript11197_g1	sodium/potassium-transporting ATPase subunit beta-3 [Xenopus tropicalis]	593.23	638.17	679.15	573.18	642.11	572.06	51.21	20.04	14.13	49.24	40.9	51.86	11.31	12.11	9.05	4.46	15	7.02	14.03	12.31	18.46	35.85	11.3	13.75	16.83	15.45	14.79	18.67	21.1	16.28	13.15	15.21	15.78	8.21	13.16	16.99	23.21	18.74	14.52	19.15	17.97
GiantSalamander_f6p60_1883_transcript10472_g3	PREDICTED: tetraspanin-7 [Monodelphis domestica]	447.8	524.67	493.75	527.72	677.48	548.47	58.08	16	11.29	49.13	46.84	58.46	7.58	14.71	5.05	1.63	9.23	1.96	11.41	10.13	20.55	34	6.4	10.6	7.62	9.34	8.88	13.27	12.04	6.82	5.63	6.52	4.84	3.09	3.07	11.53	13.34	14.65	4.76	6.46	5.32
GiantSalamander_f26p60_786_transcript13824_g1	hematopoietic- and neurologic-expressed sequence 1 [Cynops pyrrhogaster]	373.13	462.68	392.4	355.76	415.24	435.35	268.49	92.25	79.91	536.19	345.65	581.76	153.86	147.55	203.91	136.08	165.16	141.18	373.45	385.68	577.11	213.66	203.37	286.03	306.38	385.62	347.37	340.69	327.5	334.67	372.01	420.01	676.84	243.64	458.73	387.52	372.86	548.42	252.91	290.51	256.9
GiantSalamander_f25p60_1753_transcript10995_g1	PREDICTED: 14-3-3 protein epsilon isoform X1 [Lepisosteus oculatus]	563.47	631.77	601.43	643.13	618.3	673.99	239.2	143.95	101.55	281.23	293.56	234.2	72.98	66.27	101.05	96.5	54.64	85.96	224.24	210.6	266.73	146.55	213.69	231.25	183.13	192.35	197.88	149.58	125.04	149.73	251.37	285.41	313.92	178.14	302.13	226.19	194.94	254.19	263.43	244.35	251.47
GiantSalamander_f2p57_3682_transcript17365_g1	14-3-3 protein beta/alpha, partial [Chelonia mydas]	570.04	572.12	558.62	615.95	557.26	616.62	91.4	36.3	28.58	92.36	74.19	81.74	92.43	104.59	81.19	38.56	128.54	81.02	202.22	175.94	211.5	114.71	84.75	148.51	196.73	210.11	237.2	286.02	270.21	228.96	239.93	240.17	234.95	85.93	159.15	166.29	199.53	260.14	206.2	266.61	121.62
GiantSalamander_f4p60_1492_transcript28110_g1	creatine kinase, mitochondrial 1B [Xenopus laevis]	527.05	536.91	298.51	653.46	305.02	657.46	0.22	0.32	0.14	0.06	0.32	0.08	12.62	3.47	1.54	3.39	1.38	9.75	1.08	0.14	3	17.29	2.07	5.37	2.36	1.18	1.35	1.06	1.45	3.52	0.02	0.02	0.13	0.22	0.04	0.63	0.37	0.06	0.23	0.56	1.1
GiantSalamander_f5p60_577_transcript14306_g1	PREDICTED: NADH dehydrogenase [ubiquinone] iron-sulfur protein 5 [Cyprinodon variegatus]	265.14	279.64	255.31	277.54	426.32	343.98	408.98	542.46	453.86	663.66	671.66	521.73	144.24	121.82	251.92	377.83	122.72	162.06	213.6	279.45	254.67	195.49	523.16	436.46	269.17	276.29	250.11	287.19	290.59	269.33	249.33	253.5	389.61	359	584.04	315.89	241.55	313.23	408.62	422.57	632.78
GiantSalamander_f5p60_2293_transcript8344_g1	glycoprotein M6B isoform A [Alligator mississippiensis]	352.98	221.22	305.76	305.34	228.84	623.43	10.13	4.61	2.8	5.81	1.88	5	1.69	1.61	1.64	0.26	4.3	1.08	6.41	4.53	8.73	15.83	6.27	6.76	8.33	9.93	9.33	14.28	12.43	10.25	5.31	3.66	3.46	4.93	4.99	6.52	8.62	5.29	5.26	6.92	9.75
GiantSalamander_f7p60_1210_transcript12772_g1	PREDICTED: alpha-synuclein [Charadrius vociferus]	303.23	220.34	280.52	316.39	105.14	668.49	1.01	0.75	0.51	2.49	1.14	1.96	0.09	0.07	0	0.06	0.22	0.05	0.8	0.48	1.22	4.52	1.52	2.1	2.44	2.36	1.79	4.28	4.62	3.27	0.02	0.18	0.06	1.25	0.53	0.48	0.49	0.34	0.25	1.37	1.07
GiantSalamander_f2p60_463_transcript30773_g4	PREDICTED: thymosin beta-4 [Alligator mississippiensis]	125.15	127.23	162.96	121.57	151.54	102.99	27.46	9.67	6.24	24.46	11.41	17.55	16.5	8.3	15.3	12.55	9.98	9.13	449.2	357.09	492.25	180.24	251.64	316.62	396.24	281.84	375.76	247.82	239.14	244.23	185.18	176.39	333.86	102.23	143.46	665.75	423.26	570.79	475.53	379.39	372.17
GiantSalamander_f11p60_1221_transcript12801_g1	PREDICTED: tropomyosin alpha-3 chain isoform X2 [Callithrix jacchus]	24.54	29.24	28.02	32.51	44.79	23.77	103.76	71.53	51.91	146.49	164.62	106.22	4.45	5.04	2.46	1.08	3.7	4.48	45.31	7.62	91.25	479.42	59.9	278.45	407.19	345.27	336.56	429.2	593.16	665.08	15.46	23.27	14.88	36.58	8.95	73.21	10.07	12.88	7.71	7.1	5.12
GiantSalamander_f10p60_575_transcript30463_g1	PREDICTED: guanine nucleotide-binding protein G(I)/G(S)/G(O) subunit gamma-5 [Ornithorhynchus anatinus]	167.06	194.31	157.16	164.65	124.55	163.12	379.45	72.95	55.41	460.66	267.22	340.78	172.23	161.95	174.17	43.88	227.93	143.22	400.61	417.86	427.44	254.42	190.38	333.68	485.39	478.9	483.89	618.51	664.4	451.23	499.2	477.21	542.78	168.94	357.48	451.98	518.95	578.61	538.49	573.87	244.73
GiantSalamander_f4p60_803_transcript29905_g2	PREDICTED: anterior gradient protein 2 homolog [Gallus gallus]	1.19	1.44	0.99	2.78	3.21	1.56	0.24	0	0.15	0.71	0.74	0.16	3.11	4.73	5.04	15.61	5.55	12.62	69.19	169.73	20.86	71.59	117.81	91.11	97.37	82.49	11.8	9.59	11.01	68.82	311.65	307.16	113.57	250.77	664.04	376.45	267.25	44.76	559.22	149.16	647.8
GiantSalamander_f473p60_2971_transcript19115_g1	PREDICTED: complement factor B [Peromyscus maniculatus bairdii]	0.86	1.36	0.92	0.89	0	0	7.49	0.92	0.63	2.92	1	0.7	589	620.87	471.96	46.52	478.97	663	1.78	0.87	5.01	1.41	0.23	0.53	3.04	1.63	3.27	1.14	2.02	1.53	8.95	7.69	2.89	0.74	0.78	1.08	1.22	2.01	0.21	1.13	0.57
GiantSalamander_f14p60_561_transcript14379_g1	PREDICTED: cytochrome c oxidase subunit 6B1 [Latimeria chalumnae]	0.88	10.07	9.84	13.66	38.71	6.89	0.81	1.86	2.06	8.92	9.23	7	2.38	0.6	1.09	2.72	1.5	2.71	54.57	75.49	94.05	30.25	209.51	189.52	151.7	174.46	194.55	378.16	263.27	240.44	99.29	99.01	140.01	172.46	342.29	38.41	84.78	157.78	366.79	251.33	234.63
GiantSalamander_f14p60_3589_transcript17558_g1	hypothetical protein [Homo sapiens]	587.36	576.75	516.85	542.1	408.63	523.59	154.81	458.98	202.17	177.83	185.94	136.1	42.57	42.39	79.54	126.21	19.85	31.11	171.76	184.74	214.29	49.33	187.02	90.94	122.23	164.78	149.17	67.17	32.51	55.34	258.3	288.47	398.64	570.45	661.13	111.98	111	186.57	87.2	57.42	170.8
GiantSalamander_f2p60_1353_transcript12437_g1	.	103.79	101.7	121.43	112.27	236.74	221.09	61.96	83.82	52.77	95.6	142.78	98.76	25.72	18.69	96.13	268.26	41.13	52.14	142.03	216.5	164.33	89.47	358.4	291.5	105.42	113	109.01	103.03	67.71	105.6	130.47	143.41	352.54	409.28	660.43	173.93	153.61	227.87	295.19	368.59	529.57
GiantSalamander_f2p49_3144_transcript3332_g1	inter-alpha-trypsin inhibitor heavy chain H2 precursor [Xenopus tropicalis]	0	0	0	0	0.02	0	0	0	0.09	0	0.49	0	0.14	523.48	271.55	0	659.67	451.28	0.12	0.08	0.03	0	0.03	0	0	0	0.1	0	0	0	0	0	0	0	0	0	0.01	0	0	0.09	0.15
GiantSalamander_f19p60_1431_transcript12144_g1	histone H2A.J [Mus musculus]	0.47	523.19	441.56	656.25	364.84	0.42	0.37	140.58	67.3	318.31	142.94	0.17	0.13	93.81	95.09	55.77	84.03	0.13	0.14	94.45	87.62	158.22	88.8	0.1	0.13	103.56	108.19	70.17	138.62	0.15	0.19	129.26	126.85	73.63	0.14	0.14	117.97	123.71	193.56	103.18	0.24
GiantSalamander_f2p60_2325_transcript8141_g1	PREDICTED: LOW QUALITY PROTEIN: glutathione peroxidase 3 [Anolis carolinensis]	225.17	201.67	198.55	227.2	251.38	252.92	305.55	540.66	158.19	445.08	617.54	399.65	394.16	371.5	554.71	655.73	291.01	348.56	13.46	16.01	15.53	12.35	17.98	9.33	10.22	11.21	8.58	7.06	9.01	8.62	5.75	7.62	4.73	7.29	6.5	16.65	16.24	14.03	6.93	10.88	14.6
GiantSalamander_f3p55_2273_transcript24636_g1	troponin T type 3 (skeletal, fast), partial [Scaphiopus couchii]	3.42	0.62	0.99	0.96	6.21	0.51	13.11	0.21	0.07	0.57	0.3	0.14	0.38	0.15	0.17	0.25	0.1	13.42	107.2	0.69	208.77	651.63	28.8	327.86	352.1	398.27	274.21	248.76	267.78	341.49	8.59	24.67	13.18	16.48	5.38	25.64	0.87	0.59	0.05	0.32	0.92
GiantSalamander_f2p60_1135_transcript29082_g2	PREDICTED: phosphoglycerate mutase 2 [Alligator sinensis]	0	0	0	0	2.97	0.35	11.74	2.14	1.95	31.12	8.06	15.82	0.12	0	0.26	0	0.09	7.89	15.15	0.03	35.8	446.22	7.12	80.13	133.3	154.52	109.88	190.08	282.31	267.67	2.05	6.61	2.75	2.52	1.81	11.99	0.37	0	0	0	0.55
GiantSalamander_f12p60_1844_transcript10604_g1	PREDICTED: 14-3-3 protein eta [Chrysemys picta bellii]	369.87	405.96	399.03	508.56	647.69	509.8	72.32	20.23	11.91	86.31	56.68	68.41	11.16	12.14	7.64	2.92	7.94	8.06	9.65	6.49	15.63	45.39	5.35	8.33	14.57	19.05	10.79	23.57	19.62	29.52	23.97	27.44	18	12.73	21.92	8.29	10.23	9.48	4.88	4.08	4.61
GiantSalamander_f12p60_1876_transcript10469_g1	Y box-binding protein 1, partial [Carassius auratus red var.]	82.94	96.62	116.15	79.34	79.55	117.11	202.77	170.88	122.92	201.43	205.03	219.68	233.63	232.16	333.12	154.89	329.72	468.97	268.33	230.54	332.37	389.2	322.71	502.62	236.83	241.18	235.62	243.87	288.75	329.34	190.08	212.87	212.17	237.57	418.55	363.53	231.86	259.49	273.11	255.78	645.91
GiantSalamander_f4p53_1462_transcript28188_g1	PREDICTED: tropomyosin alpha-4 chain-like isoform X11 [Ficedula albicollis]	9.18	15.96	18.37	7.48	15.46	7.45	10.75	31.29	45.32	8.85	93.54	9.44	44.63	21.23	116.84	125.99	17.74	28.64	167.66	148.04	181.41	156.47	604.66	196.94	21.46	17.74	17.55	37.56	82.21	28.92	59.9	105.23	82.99	245.46	156.95	253.02	109.66	144.07	329.51	457.22	479.13
GiantSalamander_f2p60_458_transcript14688_g2	PREDICTED: NADH dehydrogenase [ubiquinone] 1 alpha subcomplex subunit 2 [Lepisosteus oculatus]	120.83	123.68	112.22	103.31	205.98	144.57	295.17	291.15	211.34	644.78	500.15	404.25	48.78	54.3	97.39	92.38	51.61	53.17	72.48	92.6	101.04	84.18	119.83	129.57	96.28	120.08	98.04	131.18	119.31	115.69	91.11	105.97	160.63	116.22	169.01	105.09	88.93	116.99	134.75	145.39	135.08
GiantSalamander_f53p60_2734_transcript5392_g1	PREDICTED: protein disulfide-isomerase [Ornithorhynchus anatinus]	231.7	264.55	246.32	230.73	154.19	204.46	227.71	63.93	44.49	176.84	136.14	128.71	431.39	455.2	373.74	500.48	540.26	599.51	469.39	478.57	457.26	252.78	295.02	350.11	378.33	392.93	344.13	262.61	261.66	334.61	520.45	519.6	365.97	150.81	236.82	644.71	524.9	483.23	516.55	380.03	415.29
GiantSalamander_f3p20_2676_transcript22215_g1	fibrinogen alpha chain precursor [Xenopus laevis]	0	0	0	0	0.06	0	0.06	0	0	0	0.18	0	215.6	2.85	1.92	644.01	190.3	2.43	0.09	0	0.03	0	0	0	0	0	0	0	0	0	0	0	0	0	0	0	0	0	0	0.04	0
GiantSalamander_f37p60_3073_transcript19697_g1	PREDICTED: cytochrome P450 2G1-like [Alligator sinensis]	0.04	0.06	0.03	0.03	0.04	0.04	0.07	0	0.11	0	0.4	0.02	258.23	343.27	373.11	389.62	396.3	643.58	0.27	0.32	0.09	0.19	1.08	0.29	0.06	0.01	0.13	0.1	0.16	0.02	0.04	0.03	0.03	0.07	0.2	0.19	0.11	0.07	0.5	0.42	0.75
GiantSalamander_f10p60_1969_transcript26368_g1	PREDICTED: nucleosome assembly protein 1-like 1 isoform X1 [Peromyscus maniculatus bairdii]	561.84	546.87	512.64	480.06	385.37	489.93	550.98	175.04	120.93	513.38	383.76	448.68	216.65	201.4	234.55	220.65	267.92	181.31	586.66	598.51	580.74	444.08	340.9	481.88	460.69	447.04	468.44	475.12	476.84	463.71	486.55	492.06	592.06	245.69	437.68	557.85	642.31	622.53	505.51	621.44	526.24
GiantSalamander_f8p60_3731_transcript1448_g1	glutamate dehydrogenase 1, mitochondrial [Xenopus tropicalis]	71.19	89.17	60.78	92.23	44.68	84.73	24.12	4.22	2.53	18.45	7.34	15.76	542.75	640.68	207.29	52.11	299.68	384.97	41.84	36.15	44.95	27.23	7.95	19.99	33.67	40.53	33.81	28.38	28.01	42.62	44.18	42.7	34.32	9.39	17.95	37.55	42.93	38.73	19.6	19.43	17.62
GiantSalamander_f3p60_639_transcript14183_g1	PREDICTED: ATP synthase subunit delta, mitochondrial [Astyanax mexicanus]	237.93	233.07	245.67	241.11	205.74	284.53	499.53	312.55	194.93	637.58	518.89	469.31	145.71	158.76	300.09	134.82	102.76	231.85	246.5	250.96	285.43	170.78	300.68	426.87	264.85	229.06	225.63	190.93	225.91	249.37	256.66	265.32	295.6	224.37	316.4	349.38	228.82	259.78	306.59	196.18	449.58
GiantSalamander_f3p42_3383_transcript2357_g1	PREDICTED: inter-alpha-trypsin inhibitor heavy chain H4 isoform X1 [Pelodiscus sinensis]	0.15	0.18	0.14	0	0.1	0.09	0	0.05	0	0	0.18	0	533.53	310.49	264.7	114.69	575.15	404.35	0.06	0.05	0.08	0	0	0	0	0.09	0.04	0	0	0	0	0.07	0.11	0.03	0.12	0	0.05	0	0	0.03	0.32
GiantSalamander_f2p23_3373_transcript2473_g1	PREDICTED: neurofilament medium polypeptide [Latimeria chalumnae]	84.92	242.9	307.67	184.46	635.65	54.22	0.1	0.05	0	0.02	0.07	0.07	0.02	0.01	0.02	0	0	0.01	0.24	0.03	5.28	51.98	0.75	3.98	0.07	0.01	0.03	0.14	0.05	0.09	0	0	0.05	0.07	0.02	0.13	0.09	0.07	0.03	0.04	0.08
GiantSalamander_f2p20_4658_transcript15872_g1	PREDICTED: angiotensinogen [Chrysemys picta bellii]	80.27	115.86	65.93	71.29	14.63	10.46	0.14	0.08	0.15	0.01	0.47	0.03	635.26	607	359.3	107.36	540.06	467.06	0.33	0.15	0.38	1.68	0.06	0.26	0.03	0.05	0.15	0.03	0.03	0.1	0.02	0.03	0.02	0.1	0.11	0.13	0.34	0.05	0.11	0.17	0.28
GiantSalamander_f13p60_1156_transcript12967_g1	reticulocalbin 3, EF-hand calcium binding domain precursor [Xenopus laevis]	0.34	0.44	0	0.45	0.03	0.47	0.34	0.39	0.37	0.85	0.72	0.38	175.71	153.88	220.21	634.32	238.91	220.13	1.76	0.49	4.06	0.71	0.58	1.03	1.05	1.02	1.02	0.38	1.74	1.03	0.54	0.37	0.77	0.37	0.14	1.33	3.22	1.76	0.68	0.87	1.37
GiantSalamander_f2p50_1262_transcript28802_g1	probable ribosome biogenesis protein RLP24 [Xenopus tropicalis]	365.25	363.62	190.36	272.83	182.18	307.68	631.22	254.11	93.45	556.38	269.45	460.74	209.39	171.45	139.15	186.51	157.91	186.12	285.44	289.91	190.04	279.44	144.97	386.28	311.19	254.3	166.13	172.69	196.85	279.49	293.94	241.61	241.93	88.8	272.43	378.96	287.69	231.61	410.75	292.59	351.53
GiantSalamander_f8p60_2831_transcript21205_g1	stromelysin-1/2-a [Cynops pyrrhogaster]	0.03	0.17	0.01	0.19	0.02	0.04	0.02	0	0.01	0	0	0.11	0	0	0.02	0	0	0	33.51	7.73	116.87	0.15	0.54	2.06	3.38	0.58	0.76	2.49	0.04	16.1	593.17	582.12	629.48	143.03	313.5	0.87	0.03	2.8	0.07	0.18	0.04
GiantSalamander_f2p41_545_transcript30541_g1	NADH dehydrogenase 1 beta subcomplex subunit 6-like [Scleropages formosus]	208.36	240.57	203.58	205.55	255.8	260.76	477.87	210.32	121.41	603.77	627.46	485.6	123.29	121.84	168.54	73.86	153.51	139.31	162.4	172.82	213.21	140.08	147.28	226.64	195.95	188.14	187.85	229.47	223.73	216.7	260.69	261.32	308.3	167.68	293.12	214.18	162.6	221.67	207.84	233.81	189.08
GiantSalamander_f3p60_606_transcript14270_g1	NADH dehydrogenase [ubiquinone] 1 beta subcomplex subunit 4 [Xenopus tropicalis]	153.64	156.59	152.12	187.22	203.07	208.48	354.42	195.36	128.14	627.01	469.51	461.6	76.42	80.05	144.87	99.78	74.77	90.43	102	116.86	137.45	111.96	132.17	131.53	141.4	154.41	142.82	181.78	156.45	178.89	157.56	141.85	225.65	168.27	304.65	128.24	115.04	160.17	144.27	151.94	151.84
GiantSalamander_f5p60_900_transcript13541_g1	PREDICTED: translocator protein 2 [Chrysemys picta bellii]	33.25	24.6	35.15	31.88	97.9	34.66	164.43	17.95	102.99	27.31	84.48	39.42	13.37	9.88	14.82	14.15	42.48	7.21	21.13	40.41	19.17	25.81	70.99	27.95	17.75	15.94	17.14	17.81	31.37	16.86	77.21	65.49	101.69	57.63	81.52	16.5	17.11	11.85	22.51	47.91	35.22
GiantSalamander_f7p60_738_transcript13971_g1	Small EDRK-rich factor 2 [Rana catesbeiana]	175.43	192.82	78.45	330.46	188.64	386.98	229.35	119.55	48.38	623.11	243.6	489.22	64.84	68.95	44.5	109.71	60.93	96.56	152.53	180.63	88.21	240.72	118.37	251.95	189.8	197.7	90.61	176.4	168.47	277.75	159.81	187.3	128.23	124.13	463.19	235.68	227.92	107.58	231.59	150.59	305.67
GiantSalamander_f23p60_1622_transcript27462_g1	PREDICTED: tubulin alpha-8 chain [Anser cygnoides domesticus]	89.44	109.92	105.04	127.22	87.58	150.04	229.75	74.64	70.27	306.22	239.81	285.03	105	91.76	136.28	154.63	57.05	143.47	472.78	436.03	621.76	165.21	378.56	407.74	298.71	351.05	420.32	281.63	265.27	277.71	389.78	444.29	571.51	253.36	388.6	498.74	368.17	595.88	503.6	463.28	412.99
GiantSalamander_f6p60_662_transcript30230_g1	selenoprotein W, 2b [Danio rerio]	13.54	5.22	5.6	10.86	3.41	12.02	258.81	39.36	17.71	89.74	45.07	71.39	619.19	574.67	241.09	59.28	383.02	375.88	64.97	59.11	49.9	18.38	34.36	55.88	52.71	33.07	17.53	25.07	15.09	26.11	99.13	91.71	32.84	18.03	25.11	70.2	60.72	38.04	63.5	44.86	34.84
GiantSalamander_f2p44_1246_transcript28796_g1	PREDICTED: RNA binding motif protein, X-linked-like-1 isoform X2 [Leptonychotes weddellii]	106.34	117.09	98.27	150.93	179.87	199.62	93.35	70.34	61.21	169.29	139.06	159.76	43.69	39.45	84.43	113.75	89.67	76.59	133.95	160.07	188.99	128.48	241.83	288.96	127.98	130.38	133.39	228.41	202.56	250.09	151.38	152.78	259.88	366.65	618.01	179.33	160.52	209.27	268.28	355.34	440.58
GiantSalamander_f3p60_2226_transcript8600_g2	PREDICTED: LOW QUALITY PROTEIN: tyrosinase-like [Xenopus tropicalis]	0.01	0.01	0	0	0.02	0.01	0.15	0	0.04	0.01	0	0	9.19	3.95	273.03	609.72	50.14	153.96	0	0.01	0.01	0.09	0	0.04	0	0	0	0	0.03	0.01	0	0	0.01	0.01	0.23	0	0.01	0	0	0	0.08
GiantSalamander_f2p59_2144_transcript25510_g1	PREDICTED: myristoylated alanine-rich C-kinase substrate, partial [Taeniopygia guttata]	363.68	440.17	379.35	614.76	393.68	576.94	40.68	25.42	15.74	48.05	33.99	38.07	4.04	2.83	4.58	2.99	2.34	3.15	47.59	41.88	44.9	59.33	44.6	60.48	39.67	42.87	29.81	41.86	43	44.89	12.06	13.49	21.09	23.89	31.08	63.94	60.28	54.3	52.42	68.98	90.35
GiantSalamander_f4p60_1415_transcript28397_g3	SET [Homo sapiens]	455.74	437.17	439.38	290.05	58.19	280.53	223.52	50.59	57.38	130.93	63.8	87.71	143.74	142.47	149.25	42.67	101.09	107.89	512.89	449.76	612.88	217.54	144.03	290.08	395.76	396.72	466.59	230.52	271.87	296.91	472.04	513.75	557.69	101.75	151.08	594.68	516.66	565.34	326.54	294.38	242.19
GiantSalamander_f2p51_3130_transcript19416_g1	ORF2-encoded protein [Danio rerio]	0.71	0.94	0.95	0.78	1.52	1.04	2.01	2.04	1.51	4.9	5.62	3.14	286.93	241.04	462.37	228	221.44	612.38	0.39	0.49	0.78	0.73	0.86	0.58	0.24	0.29	0.42	0.25	0.14	0.41	0.56	0.65	0.46	0.52	0.6	0.71	0.54	0.87	1.57	0.8	1.18
GiantSalamander_f7p60_2667_transcript22214_g1	PREDICTED: polyadenylate-binding protein 1 [Latimeria chalumnae]	236.7	261.54	249.43	292.11	239.5	292.61	299.97	69.79	42.1	232.12	201.17	219.85	118.39	109.95	94.94	41.1	165.89	156.27	248.23	250.94	198.37	266.4	180.73	379.7	167.33	159	138.15	181.24	191.46	209.56	240.42	246.83	229.53	96.42	141.44	282.5	242.09	198.04	346.04	318.98	239.91
GiantSalamander_f8p60_1660_transcript11399_g1	RecName: Full=Pentraxin fusion protein; Flags: Precursor	0.04	0.15	0.17	0.16	0.26	0.22	0.16	0	0.16	0.14	0.17	0	159.57	190.13	228.12	189.09	344.7	495.73	0.08	0.05	0.14	0.04	0.03	0	0.03	0	0.04	0	0.01	0	0	0	0	0.11	0.16	0.03	0.07	0	0.01	0	0
GiantSalamander_f2p60_3039_transcript3779_g1	otogelin precursor [Xenopus laevis]	1.05	2.1	1.89	4.32	2.63	3.12	0.06	0.06	0.03	0.1	0.07	0.18	0.03	0.06	0.21	0.3	0.32	0.69	205.95	249.07	68.7	42.39	21.92	142.78	91.58	120.75	49.95	8.74	5.26	36.94	532.31	608.86	537.83	307.52	386.88	209.95	262.6	78.8	53.4	1.72	119.28
GiantSalamander_f8p60_497_transcript14566_g1	PREDICTED: NADH dehydrogenase [ubiquinone] 1 alpha subcomplex subunit 6 [Ornithorhynchus anatinus]	169.56	211.11	168.52	174.57	329.63	263.26	282.26	388.97	369.52	607.67	574.35	385.14	69.59	59.74	137.59	149.69	77.48	101.71	109.73	155.83	150.16	106.34	373.95	378.02	120.54	135.6	133.46	120.16	154.07	134.7	130.38	132.18	202.43	256.51	281.91	260.69	118.5	147.78	287.84	181.26	397.17
GiantSalamander_f2p52_2144_transcript9021_g1	serotransferrin-B precursor [Xenopus laevis]	0	0.16	0	0.18	13.42	0	0	0.66	0	0.2	0	0.11	7.83	8.33	21.71	1.88	4.71	11.22	0	0	0.18	0	0.84	0.44	0	0	0	0	0	0	0	0	0	0	0	0	0	0.14	0	0	0.62
GiantSalamander_f13p60_526_transcript30536_g2	PREDICTED: transmembrane protein 258 [Nannospalax galili]	250.91	260.9	246.53	265.32	272.44	297.93	287.71	158.92	134.23	386.27	364.56	336.03	288.73	281.21	453.57	541.27	412.13	406.38	369.69	431.13	297.39	307.16	373.77	418.4	383.58	385.35	317.63	387.79	420.28	370.42	371.11	369.17	524.38	328.36	513.47	498.75	522.32	425.1	427.58	500.3	546.11
GiantSalamander_f12p60_602_transcript30370_g1	PREDICTED: cystatin-B-like [Oreochromis niloticus]	0.08	0	0.18	0.2	1.68	0.25	0	0.17	0.15	0.13	0.24	0	0.05	0.06	0	0	0.11	0	249.93	83.33	48.16	96.87	174.01	258.33	417.54	129.83	201.92	304.35	573.23	385.19	1.68	0.57	2.97	3.69	3.99	309.49	91.97	179.14	388.77	601.28	195.05
GiantSalamander_f89p60_2186_transcript24952_g1	adenosylhomocysteinase B [Xenopus laevis]	33.94	40.63	32.62	35.94	31.9	35.34	42.79	13.14	10.52	35.65	29.62	32.23	353.51	383.72	398.46	547.23	471.7	601.01	230.92	223.55	327.42	199.15	206.48	354.74	160.1	162.71	186.85	213.67	194.36	220.4	132.37	130.15	194.14	66.9	98.12	341.94	293.85	386.76	449.42	518.36	416.87
GiantSalamander_f2p37_1816_transcript26912_g1	PREDICTED: cytochrome P450 2K1-like [Pelodiscus sinensis]	0	0.04	0.02	0	0	0.03	0.07	0.07	0.11	0	0.5	0.01	381.95	490.86	358.37	117.65	598.07	487.12	0.03	0.09	0.03	0.02	0.01	0	0.02	0	0.09	0.08	0.01	0	1.55	3.83	3.03	0.19	0.51	0	0.01	0.04	0	0.08	0.13
GiantSalamander_f13p60_720_transcript30132_g1	mitochondrial pyruvate carrier 2 [Xenopus tropicalis]	197.53	200.02	184.42	195.3	203.38	245.43	343.26	226.38	171.88	596.45	501.13	488.07	192.09	235.32	340.23	188.81	290.81	254.5	152.97	164.9	137.71	106.86	148.83	149.68	199.36	202.72	178.26	194.56	191.76	196.5	301.55	277.63	268.55	263.89	498.39	152.53	175.17	174.11	142.24	166.96	213.19
GiantSalamander_f11p60_1803_transcript10702_g1	coagulation factor 10 precursor [Xenopus tropicalis]	0	0.11	0	0.03	0.14	0.19	0.22	0.25	0.05	0.1	0.6	0.22	269.06	453.54	201.2	33.34	358.06	262.68	0.07	0.07	0	0.03	0	0	0	0	0.09	0	0.02	0.04	0.08	0.02	0.01	0.02	0.14	0	0.05	0.03	0.02	0.13	0.1
GiantSalamander_f2p19_1164_transcript12901_g1	PREDICTED: veficolin-1-like [Anolis carolinensis]	0.49	0.55	0.54	0.69	0.3	0.29	270.42	325.92	163.96	396.3	245.48	295.93	122.94	109.85	192.28	155.04	62.73	81.31	0.66	0.67	1.82	0.59	0.13	0.2	0.41	0.47	0.76	0.85	1.09	0.42	0.04	0.44	0.65	0.23	0.25	0.57	0.32	0.99	0.24	0.62	0.53
GiantSalamander_f13p60_2458_transcript23385_g2	chymotrypsin like elastase family member 1 precursor [Xenopus tropicalis]	0.17	0.15	0	0.12	0.28	0.2	0.06	0.05	0.02	0.01	0.05	0.03	0	0	0.03	0.03	0.01	0.12	166.64	156.9	53.15	5.53	4.21	53.16	28.23	78.49	19.47	22.88	14.46	95.06	334.38	592.23	149.41	190.39	502.1	27.77	82.47	79.69	8.83	13.46	23.65
GiantSalamander_f6p60_495_transcript30647_g1	PREDICTED: transmembrane protein 261 [Fundulus heteroclitus]	140.23	158.81	131.59	129.66	258.59	196.16	286.66	411.03	326.51	485.75	468.48	356.75	78.58	76.36	146.44	248.22	110.17	112.05	138.34	197.85	141.64	161.14	448.13	446.75	168.94	166.18	158.73	233.01	231.68	184.92	120.13	133.48	197.78	281.81	382.75	228.33	157.19	171.92	346.53	460.24	498.27
GiantSalamander_f29p60_2033_transcript25995_g1	Coactosin-like protein [Rana catesbeiana]	113.88	118.39	112.67	105.55	94.54	107.52	62.31	34.8	24.8	46.92	34.13	36.69	48.74	44.01	52.54	46.19	36.29	33.91	329.92	264.95	587.73	91.02	138.47	187.88	175.1	193.23	164.81	145.22	108.43	159.26	168.4	187.2	228.49	132.22	187.68	294.23	291.17	323.26	161.97	204.9	252.01
GiantSalamander_f6p60_1085_transcript29199_g1	NAD(P)H dehydrogenase [quinone] 1 [Xenopus tropicalis]	7.38	9	7.37	11.97	13.05	10.93	2.6	1.29	0.76	6.83	4.9	5.89	6.87	5.43	7.42	5.76	6.91	9.44	47.58	50.34	24.85	27.08	33.11	64.75	49.54	40.12	36.79	30.66	26.25	41.83	244.49	130.89	100.47	102.09	223.09	69.03	50.46	53.6	61.7	40.67	72.66
GiantSalamander_f21p60_5287_transcript176_g1	PREDICTED: complement factor H [Serinus canaria]	13.15	1.99	6.58	0.46	1.15	1.27	125.06	17.89	10.21	109.69	70.09	49.75	538.2	587.19	245.78	30.13	561.27	434.29	1.84	1.49	1.25	2.26	1.97	0.39	0.19	0.19	0.22	0.11	0.21	0.16	4.92	4.89	1.93	1.45	1.47	2.35	3.19	1.76	0.99	2.88	0.85
GiantSalamander_f2p60_1182_transcript28970_g2	low molecular weight slow troponin T [Rhinella marina]	0.64	1.08	0.88	1.59	5.45	1.51	73.3	26.13	13.68	203.49	190.95	188.89	0.78	0.57	2.39	0.24	0.41	0.76	39.16	1.44	72.99	420.02	26.15	154.43	409.98	294.06	304.38	396.3	545.88	583.57	5.72	13.99	14.24	33.61	10.84	49.9	1.04	1.12	2.95	2.89	5.88
GiantSalamander_f3p40_1599_transcript11627_g1	high mobility group box 3 [Xenopus laevis]	514.1	583.36	542.44	412.11	215.22	396.22	101.02	21.83	17.91	45.87	29.75	38.83	67.94	69.98	49.7	5.94	33.21	26.81	102.28	73.44	96.8	41.87	10.13	24.88	109.2	102.19	119.55	77.91	62.22	67.19	104.42	110.85	115.02	9.86	12.96	90.13	89.94	106.34	31.97	35.43	12.5
GiantSalamander_f2p12_841_transcript29879_g1	ribosomal protein L24 [Solea senegalensis]	171.94	160.74	159.61	135.34	219.76	183.65	310.32	179.34	183.53	283.15	235.94	261.16	121.16	113.84	193.63	238.91	178.45	159.24	207.96	277.11	241.13	281.51	565.51	551.39	226	222.49	227.05	263.83	261.46	278.27	194.16	229.45	298.34	244.12	308.05	301.84	243.83	308.43	464.75	535.15	583.2
GiantSalamander_f4p37_1083_transcript29291_g1	PREDICTED: cytochrome b-c1 complex subunit Rieske, mitochondrial [Chrysemys picta bellii]	161.42	167.28	154.93	188.26	138.83	199.15	384.18	95.34	78.54	583.13	388.81	440.3	116.56	104.33	147.23	45.02	103.71	99.53	109.58	101.68	144.05	113.73	80.01	108.26	164.43	185.56	193.03	186.05	164.85	195.89	214.03	217.14	246.68	80.43	156.89	110.69	108.35	168.56	119.4	128.51	99.81
GiantSalamander_f16p60_1051_transcript13296_g1	PREDICTED: HIG1 domain family member 1A, mitochondrial [Chelonia mydas]	265.88	248.01	198.62	231.39	225.53	207.42	389.49	80.66	59.97	333.58	147.78	191.3	48.92	43.53	28.43	3.85	22.33	11.58	192.69	106.26	330.11	29.98	29.55	46.86	191.1	189.41	213.29	428.49	224.1	215.92	582.79	412.7	472.55	69.35	158.67	72.42	75.47	283.39	121.7	123.84	41.24
GiantSalamander_f55p60_1737_transcript10682_g1	PREDICTED: heterogeneous nuclear ribonucleoprotein A/B isoform X1 [Xenopus tropicalis]	361.15	358.42	305.33	513.26	269.93	581.89	95.06	19.81	11.7	167.3	82.32	134.97	56.23	67.4	69.75	22.94	70.14	62.59	203.26	169.99	242.8	140.34	74.7	126.84	173.4	195.72	203.64	290.73	226.88	285.54	228.23	240.91	289.41	88.75	176.24	177.5	180.76	254.83	171.71	195.7	116.6
GiantSalamander_f5p60_813_transcript13806_g1	Chain A, Solution Structure Of Mouse Er	397.64	406.79	388.3	439.86	462.53	498.3	129.22	49.88	36.83	156.2	115.2	122.34	52.65	47.03	65.91	33.45	65.95	49.94	132.12	131.82	184.45	89.56	77.06	97.02	146.75	148.46	167.92	178.03	189.89	149.51	180.92	186.85	275.67	92.91	156.31	132.06	139.47	213.85	125.23	179.44	98.31
GiantSalamander_f5p60_553_transcript30550_g1	NADH dehydrogenase 1 subunit C2 [Osmerus mordax]	163.18	186.35	163.68	186.61	181.55	222.63	336.13	104.76	68.09	581.07	360.69	420.77	155.9	164.38	236.65	85.26	150.93	156.83	108.5	121.51	146.39	131.75	70.29	132.06	169.75	174.31	160.52	204.33	215.56	182.38	159.18	172.19	248.23	82.46	184.61	147.82	133.04	166.76	132.32	151.25	88.85
GiantSalamander_f7p60_438_transcript30813_g1	NADH dehydrogenase-like [Scleropages formosus]	133.97	135.13	112.89	132.13	160.31	161.63	403.5	118.77	88.11	580.74	411.05	442.55	91.94	85.01	93.53	30.55	91.1	88.92	110.21	131.74	109.57	146.17	133.41	178.02	179.51	162.89	156.2	238.43	262.79	199.17	150.2	171.09	181.44	94.1	158.55	148.36	147.98	154.41	183.54	248.55	138.21
GiantSalamander_f13p60_535_transcript14455_g1	PREDICTED: myeloma-overexpressed gene 2 protein homolog [Monodelphis domestica]	217.8	228.37	216.8	300.96	480.36	369.13	196.8	123.41	115.6	252.71	208.95	212.09	103.94	99.38	195.33	154.35	139.46	100.61	88.03	101.58	115.61	96.08	119.34	128.15	109.71	108.24	118.31	133.85	144.62	120.66	116.9	105.55	168.03	132.63	214.54	128.71	107.31	139.25	125.78	187.55	175.34
GiantSalamander_f14p60_970_transcript29519_g1	PREDICTED: mesencephalic astrocyte-derived neurotrophic factor [Chrysemys picta bellii]	173.99	192.58	166.76	117.44	151.69	144.11	156.23	83.09	46.62	116.4	71.14	94.49	232.17	252.92	259.98	112.92	154.76	168.13	328.33	358.45	407.74	106.8	134.05	207.46	266.5	290.16	312.05	205.6	175.29	259.84	578.27	514.63	564.85	200.61	419.94	351.36	298.56	401.82	255.54	204.63	212.71
GiantSalamander_f5p60_2405_transcript7352_g1	kunitz-type protease inhibitor 2 precursor [Xenopus tropicalis]	67.25	63.66	67.04	39.66	6.89	51.3	10.63	0.43	0.15	3.16	1.43	2.77	9.08	8.14	5.87	1.84	3.48	4.29	348.34	319.32	379.2	59.2	11.85	53.94	387.18	395.61	413.81	263.45	161.11	246.73	575.7	533.22	432.21	31.8	41.36	370.05	387.88	406.23	129.17	47.36	18.67
GiantSalamander_f2p60_531_transcript14463_g2	C-Myc-binding protein [Xenopus tropicalis]	42.36	41.49	27.77	43.94	47.64	45.44	55.38	41.34	19.88	84.16	66.74	63.79	14.91	17.73	28.53	31.91	20.02	21.17	45.67	40.74	53.6	27.16	39.95	39.98	43.77	45.97	45.16	70.74	67.26	60.96	258.45	246.18	226.51	235.71	575.68	46.75	44.48	57.33	78.24	86.96	58.45
GiantSalamander_f19p60_1388_transcript12338_g1	PREDICTED: V-type proton ATPase subunit E 1 [Calidris pugnax]	366.5	411.45	385.77	467.29	470.49	570.56	55.38	16.22	12.61	58.92	41	48.06	23.89	23.68	30.53	15.88	16.46	17.8	50.86	53.22	75.34	38.85	30.69	35.42	54.05	60.68	65.79	55.82	43.84	49.07	92.8	111.15	102.47	36.83	74.28	54.86	60.63	70.24	37.64	37.54	41.45
GiantSalamander_f9p60_574_transcript14327_g1	FXYD domain-containing ion transport regulator 3 precursor [Xenopus tropicalis]	207.64	262.75	267.49	262.77	573.55	316.2	23.58	10.06	6.33	13.33	17.24	9.6	3.96	1.84	8.22	2.25	1.66	6.89	188.21	228.07	183.11	340.22	228.65	321.79	263.14	253.94	260.41	337.99	318.18	271.25	183.16	150.82	255.66	155.1	277.74	371.94	295.82	331.69	361.7	446.2	361.39
GiantSalamander_f9p60_550_transcript14452_g1	NADH:ubiquinone oxidoreductase subunit A13 [Xenopus laevis]	145.96	158.14	159.13	165.98	229.67	210.67	282.49	325.4	217.27	573.42	504.52	371.05	53.84	52.29	129.31	127.61	51.95	90.62	101.54	114.3	116.01	63.26	210.34	155.57	117.28	132.95	117.15	100.12	108.18	104.92	146.69	142.99	182.73	271.71	369.58	145.57	101.48	129.13	144.18	122.77	261.29
GiantSalamander_f4p60_229_transcript31201_g1	.	150.34	118.48	112.57	185.87	573.01	199.2	152.58	158.74	159.55	88.86	151	152.68	3.63	21.57	31.34	19.04	35.51	40.81	93.59	50.2	90.37	55.3	164.82	125.57	69.12	20.04	65.78	51.19	54.79	92.33	33.11	31.52	90.01	157.38	187.32	83.41	92.15	62.86	178.03	192.09	167.66
GiantSalamander_f5p60_1863_transcript26751_g2	PREDICTED: peroxiredoxin-5, mitochondrial [Chrysemys picta bellii]	86.81	115.3	93.52	102.04	84.29	90.54	18.08	9.38	7.4	14.64	12.21	12.57	62.57	74.61	105.51	40.29	40.15	70.18	458.56	449.32	352.13	104.18	215.17	301.59	370.93	381.95	384.93	216.34	198.77	223.3	562.15	572.23	439.54	236.68	434.21	511.1	434.44	464.42	420.3	303.45	402.31
GiantSalamander_f9p60_4455_transcript16122_g1	cathelicidin precursor [Tylototriton verrucosus]	0.98	1.32	1.61	1.8	0.74	1.1	1.76	0.33	0.2	1.22	1.01	1.06	5.74	3.93	4.96	2.08	3.65	2.65	83.61	18.84	572.12	3.47	12.46	25.43	33.12	71.17	138.64	93.44	94.56	157.1	8.22	9.52	20.64	2.91	3.6	7.24	9.7	79.18	6.61	13.1	9.69
GiantSalamander_f18p60_610_transcript14188_g1	PREDICTED: keratinocyte-associated protein 2 [Alligator mississippiensis]	156.17	170.22	150.5	119.25	152.56	136.95	201.03	188.94	156.35	299.54	306.69	216.67	163.41	152.79	309.87	433.12	116.86	220.61	221.97	303.36	227.69	156.77	414.6	394.87	205.05	212.86	185.72	120.18	145.61	164.65	244.36	228.89	312.09	366.43	474.36	442.85	322.23	256.81	342.4	228.82	572.04
GiantSalamander_f5p60_1140_transcript29056_g2	apolipoprotein IA-I10 [Anguilla japonica]	454.99	492.47	344.44	571.95	113.47	126.72	2.2	0.6	0.37	1.26	1.8	0.58	2.53	3.5	3.63	3.01	9.58	3.28	2.16	0.58	2.65	19.78	1.53	4.76	8.48	8.46	5.56	9.05	13.47	9.31	0.46	0.82	2.63	3.27	0.76	41.47	38.34	29.72	32.34	30.82	11.23
GiantSalamander_f2p60_646_transcript30291_g3	PREDICTED: 60S ribosomal protein L35a [Acinonyx jubatus]	155.62	4.69	145.38	144.33	268.06	6.45	242.43	215.86	253.61	271.89	276.68	5.5	90.19	2.36	156.58	446.71	108.06	3.82	152.92	10.03	196.01	185.36	571.59	13.93	172.33	7.92	169.5	207.34	215.82	5.47	140.4	9.68	260.24	293.06	10.34	264.22	5.25	234.26	396.42	401.15	12.43
GiantSalamander_f36p60_1765_transcript26967_g1	PREDICTED: resistin-like [Gekko japonicus]	0.12	0.36	0.19	0.37	0.6	0.18	68.83	21	3.04	12.99	7.53	9.77	345.08	169.84	569.25	99.28	174.85	272.84	0.86	0.31	13.23	0.05	1.33	0.17	0.1	0.06	0.15	0.58	0.25	0.38	4.2	2.12	1.95	1.43	3.74	0.69	0.8	6.29	0.22	0.45	0.52
GiantSalamander_f5p60_1285_transcript28695_g1	PREDICTED: lysozyme C-like [Xenopus tropicalis]	0.1	0.06	0.05	0.35	0.27	0.1	0	0	0.05	0.04	0.61	0	0.03	0.03	0	0	0.08	0.05	12.61	13.26	20.99	6.88	48.9	64.17	38.98	51.8	71.29	382	184.3	140.79	0.37	0.26	0.57	0.07	0.07	0.69	0.11	7.8	145.55	93.05	57.89
GiantSalamander_f10p60_2591_transcript6268_g1	PREDICTED: transcobalamin-1 [Chrysemys picta bellii]	0.81	0.62	0.8	0.82	1.57	0.55	4.57	1.16	2.51	1.33	5.36	2.22	21.26	10.36	28	22.87	7.82	11.89	115.68	84.63	174.8	18.71	126.24	51.51	91.88	119.07	325.7	60.22	67.65	53.64	39.33	21.85	29.56	18.92	38.79	232.67	68.75	324.29	262.3	115.21	263.9
GiantSalamander_f7p60_1171_transcript12870_g1	PREDICTED: tachykinin-3 [Chelonia mydas]	79.28	98.12	64.89	52.45	59.28	57.9	0.08	0	0	0.02	0	0	17.64	89	150.62	148.78	35.8	110.65	0.1	0	0.78	1.8	0.04	0.26	0	0.04	0	0	0	0	0	0	0	0.05	0.09	0.06	0.13	0.02	0	0	0.01
GiantSalamander_f2p21_2930_transcript20691_g1	Nucleolin [Chelonia mydas]	512.4	512.98	530.08	373.73	183.88	352.18	315.07	86.29	58.17	258.92	191.23	191.58	155.38	153.69	173.32	135.9	128.11	135.66	500.21	441.3	565.26	342.24	214.06	450.29	380.99	382.71	463.31	352.88	335.32	393.44	462.76	439.46	530.23	143.9	209.82	529.38	413.81	531.15	446.33	477.51	389.77
GiantSalamander_f7p60_3695_transcript1536_g1	FXYD domain containing ion transport regulator 6 precursor [Xenopus laevis]	401.02	447.36	379.47	562.96	428.17	445.32	66.76	44.75	29.99	107.75	90.12	98.29	2.63	2.95	2.42	3.62	0.97	1.56	9.37	8.4	13.68	20.57	5.46	10.33	10.33	11.9	9.36	9.44	10.93	10.49	5.28	6.85	8.55	3.13	3.82	9.41	11.1	7.82	4.46	3.1	5.98
GiantSalamander_f22p60_1704_transcript11079_g1	.	0.11	0	0.2	0.12	1.66	0.23	2.13	1.04	0.46	9.89	9.11	8.78	0.24	0.45	0.17	0.19	0.27	0.11	265.13	228.44	154.41	220.1	225.27	245.84	192.4	178.74	243.41	455.62	373.86	341.96	1.58	2.13	4.18	10.86	6.87	279.13	255.84	380.77	418.36	412.6	343.12
GiantSalamander_f4p60_2359_transcript24184_g1	PREDICTED: coagulation factor XIII B chain-like isoform X1 [Calidris pugnax]	1.08	0.1	0.44	0.03	0.01	0	1.97	0.19	0.23	1.01	0.93	0.24	373.19	471.78	233.16	1.42	562.2	169.26	0.08	0.03	0.03	0.06	0.05	0	0	0	0.04	0	0	0	0.47	0.43	0.02	0.04	0.11	0.09	0.23	0.08	0	0.06	0.12
GiantSalamander_f13p60_948_transcript29555_g1	biliverdin reductase B [Xenopus laevis]	80.67	86.36	87.55	96.25	163.5	96.63	237.21	30.81	87.9	82.2	168.78	80.45	57.9	55.7	94.92	118.9	79.1	79.75	82.08	125.4	59.66	70.73	156.2	113.19	61.77	56.71	45.75	37.58	62.7	55.68	159.81	148.87	166.87	135.03	180.01	83.59	82.53	43.84	87.23	93.24	139.42
GiantSalamander_f9p60_6585_transcript37_g1	PREDICTED: SH3 domain-containing protein C23A1.17-like isoform X1 [Salmo salar]	0.02	0.08	0.09	0.06	0.21	0.1	0	0.03	0.02	0.03	0.32	0.02	0.03	0.02	0	0	0.03	0	62.58	17.39	13.82	22.17	47.32	77.19	40.67	47.57	116.41	244.45	125.52	131.13	0.04	0.21	0.27	0.29	0.18	23.87	8.24	85.23	120.13	149.16	67.02
GiantSalamander_f20p60_1318_transcript12478_g1	PREDICTED: alcohol dehydrogenase 1A [Chrysemys picta bellii]	0	0	0	0.13	0.13	0	0.05	0.26	0.4	0.22	1.44	0.04	559.35	272.35	286.47	51.55	452.34	245.22	0.08	0.11	0	0	1.13	0.01	0.04	0.1	0.08	0.02	0	0.02	0	0	0	0.24	0	0	0.05	0	0.02	0.25	0.41
GiantSalamander_f15p60_1415_transcript28291_g1	mCG1038069, partial [Mus musculus]	402.51	417.01	408.79	399.15	558.86	430.77	162.22	83.59	61.21	201.02	139.92	168.52	58.15	54.88	77.52	28.32	53.12	40.41	138.07	129.57	195.47	100.52	95.99	100.83	151.6	163.1	180.85	198.08	182.1	163.4	170.42	167.4	257.76	111.03	222.43	134.96	145.64	223.83	126.93	165.91	125.12
GiantSalamander_f10p60_990_transcript29431_g1	sarcolipin [Gallus gallus]	0.4	0.22	0.14	0.08	2.62	0	5.89	0.24	0	0.65	0.47	0.41	0.23	0.04	0	0	0	10.63	26.93	0	25.06	557.95	4.18	58.77	141.24	242.95	106.94	167.54	146.35	164.72	0.8	4.19	1.9	3.09	0.68	12.87	0.42	0.44	0.03	0	0.47
GiantSalamander_f2p30_2580_transcript6389_g1	fibrinogen alpha chain precursor [Xenopus laevis]	0.04	0.02	0	0.01	0	0	0.04	0.36	0	0	0	0.04	1.08	3.54	553.25	0.91	1.05	116.76	0	0.12	0	0.03	0	0	0	0	0	0	0	0	0	0	0	0.19	0.01	0	0	0	0	0	0
GiantSalamander_f5p47_4666_transcript423_g1	decorin precursor [Xenopus tropicalis]	15.03	14.88	12.41	11.93	7.42	4.04	76.33	27.47	17.3	45.62	66.52	44.15	29.19	36.88	24.71	13.52	26.76	11.74	266.66	214.41	259.85	308.62	84.09	198.69	327.13	322.85	242.61	206.59	319.53	208.77	112.65	140.52	138.77	80.93	83.63	380.93	553.04	342.02	151.97	198.18	164.06
GiantSalamander_f15p60_2208_transcript25075_g1	RecName: Full=Keratin, type II cytoskeletal 8; AltName: Full=Cytokeratin-8; Short=CK-8; AltName: Full=Keratin-8; Short=K8	112.64	107.76	84.67	48.84	35.96	40.99	327.14	143.1	62.64	299.32	222.46	231.31	379.25	442.92	552.86	234	200.89	397.53	39.91	24.92	107.76	78.28	155.5	52.95	6.92	6.59	7.66	11.64	17.08	11.64	59.72	71.74	71.38	63.2	53.86	58.56	33.76	39.46	50.62	45.9	39.7
GiantSalamander_f4p60_1940_transcript10201_g1	phosphoglycerate kinase 1 [Xenopus laevis]	368.06	387.2	398.9	540.22	484.1	469.77	240.43	78.16	59.28	308.58	248.44	248.97	94.64	88.37	100.79	60.79	85.12	105.09	145.8	130.89	167.3	522.48	72.15	184.27	241.3	260.67	235.46	284.78	298.21	352	149.66	157.05	160.01	56.8	94.28	130.47	120.5	149.8	139.45	134.67	109.33
GiantSalamander_f2p60_520_transcript14519_g2	PREDICTED: NADH dehydrogenase [ubiquinone] 1 alpha subcomplex subunit 7 [Chrysemys picta bellii]	86.43	108.12	84.89	137.27	195.87	165.67	265.36	149.91	106.36	551.86	453.79	404.34	24.82	25.21	33.75	33.67	36.46	36.17	35.09	50.22	45.87	90.54	92.27	107.56	72.03	81.79	53.15	132.77	128.31	122.11	58.42	62.16	65.98	60.66	117.34	59.49	60.15	51.42	120.06	129.41	140.44
GiantSalamander_f10p60_4279_transcript16243_g1	.	3.21	2.84	2.16	0.73	1.23	1.38	0.08	0.04	0	0.02	0	0.07	0.05	0.11	0.34	0.16	0.01	0.77	0.31	0.13	0.76	0.34	0.28	1.83	2.43	0.73	0.61	2.64	0.26	0.9	548.41	551.84	168.93	111.21	297.97	0.8	0.28	0.4	0.25	0.1	0.56
GiantSalamander_f2p60_833_transcript29862_g2	NADH dehydrogenase [ubiquinone] 1 beta subcomplex subunit 9 [Sparus aurata]	177.44	196.08	178.45	184.77	265.83	241.29	395.97	240.81	168.09	551.28	449.97	443.61	138.13	135.79	231.39	108.55	123.98	129.35	106.33	125.47	148.07	135.68	125.53	154.72	179.45	199.24	194.86	223.95	209.97	198.49	176.43	183.53	257.02	124.88	219.47	125.94	131.35	171.84	131.3	157.87	137.12
GiantSalamander_f2p28_2422_transcript7368_g1	PREDICTED: nebulin-like, partial [Phalacrocorax carbo]	1.51	0.16	0.29	0.28	2.06	0.08	8.29	0.96	0.3	3.95	1.77	1.7	1.26	2.09	2.51	2.11	2.35	9.39	28.98	0.08	53.18	299	34.97	217.29	133.39	149.16	108.68	169.12	92.67	203.8	2.29	7.8	7.66	15.25	7.29	10.62	0.27	0.16	0.02	0.08	0.88
GiantSalamander_f6p60_3781_transcript17122_g1	PREDICTED: LOW QUALITY PROTEIN: WAP four-disulfide core domain protein 3 [Zonotrichia albicollis]	0	0	0	0	1.61	0.88	1.49	4.99	0.72	4.16	0.43	8.85	15.19	98.84	550.35	2.84	119.24	131.28	3.18	20.61	5.15	4.54	50.69	63.5	2.75	16.38	9.64	20.19	11.75	15.71	0.19	0.67	2.58	4.65	7.39	2.16	4	10.61	68.33	84.31	136.38
GiantSalamander_f11p60_1365_transcript12376_g1	transaldolase 1 [Xenopus laevis]	83.9	79.87	74.55	82.97	66.76	95.14	51.51	11.62	9.45	37.48	25.28	28.69	175.2	137.22	156.16	69.55	171.99	116.15	248.7	188.92	325.06	103.28	140.62	197.6	312.24	282.62	422.12	498.88	397.23	308.73	186.95	176.61	224.78	56.86	98.4	192.32	158.23	348.36	280.06	416.2	147.22
GiantSalamander_f3p60_1552_transcript11721_g1	Chain A, Up1, The Two Rna-Recognition Motif Domain Of Hnrnp A1	159.03	181.92	124.23	494.45	179.57	464.2	62.01	23.77	19.87	221.86	142.81	175	33.79	35.14	59.11	113.88	48.71	90.63	142.53	96.79	249.68	129.55	153.16	132.22	92.58	130.86	135.96	211.17	166.97	222.46	212.17	243.83	247.28	251.1	381.36	86.02	84.56	152.64	157.98	196.48	179.41
GiantSalamander_f8p60_1554_transcript28060_g2	PREDICTED: beta-ureidopropionase isoform X1 [Alligator mississippiensis]	13.95	16.57	12.71	15.14	8.73	13.64	38.23	13.4	10.67	46.18	30.7	30.31	267.94	300.62	282.72	199.64	368.14	494.7	27.11	26.53	27.5	26.72	17.33	36.79	25.46	24.24	20.9	24.25	27.19	24.23	15.66	16.7	17.37	9.74	10.41	32.03	25.32	21.84	36.34	32.93	24.41
GiantSalamander_f5p60_395_transcript14798_g2	reactive oxygen species modulator 1 [Xenopus tropicalis]	214.23	183.35	176.48	281.6	375.17	299.21	357.64	178.24	135.71	506.1	428.11	374.54	226.65	199.25	350.4	311.26	353.38	261.68	182.85	213.73	232.99	226.16	302.28	318.42	222.6	182.63	178.47	262.58	343.05	254.04	225.28	212.62	354.48	262.08	424.03	224.07	215.84	254.52	344.16	545.57	380.41
GiantSalamander_f83p60_2718_transcript21847_g1	PREDICTED: keratin, type I cytoskeletal 42-like [Xenopus tropicalis]	0	0.07	0.19	0.13	0	0.15	0	0.07	0	0.03	0	0	0.03	0	0	0.03	0	0	14.81	2.08	0.11	0.35	423.17	78.45	463.52	455.64	545.18	388.34	431.68	182.91	0.55	0.26	0.21	0.08	0	0.06	0	0.17	0.08	0.31	0.22
GiantSalamander_f46p60_1844_transcript26612_g1	PREDICTED: T-complex protein 1 subunit epsilon [Chrysemys picta bellii]	423.87	440.23	407.91	407.07	441.68	440.86	466.9	181.21	145.81	432.61	351.5	368.95	207.44	206.92	223.89	175.48	248.01	188.58	385.53	380.02	423.8	434.12	315.8	508.18	410.52	416.03	424.5	424.52	431.3	449.44	459.83	445.71	479.85	240.36	348.46	381.01	383.62	454.1	437.12	544.28	413.9
GiantSalamander_f3p60_1624_transcript11566_g2	PREDICTED: blood vessel epicardial substance [Caprimulgus carolinensis]	8.92	10.18	8.81	9.04	9.45	12.11	362.61	224.19	105.16	498.08	356.59	543.22	0.14	0.02	0.07	0.06	0	0.57	4.48	0.14	7.14	37.08	0.75	14.12	12.09	16.77	9.04	11.8	14.76	16.97	3.53	2.96	2.12	1.89	3.12	0.87	0.14	0.15	0.1	0.18	0.02
GiantSalamander_f9p60_1028_transcript13308_g1	iron-sulfur cluster assembly enzyme ISCU, mitochondrial [Xenopus tropicalis]	471.59	542.31	473.83	329.96	381.51	388.31	393.73	150.86	111.1	198.31	155.75	177.17	113.55	130.61	154.71	29.49	93.39	65.04	156.09	178.72	182.76	75.48	52.56	81.25	172.74	174.88	195.12	86.33	105.96	80.01	165.8	173.49	241.09	50.44	90.94	187.86	202.89	227.67	90.14	107.57	75.6
GiantSalamander_f2p60_1542_transcript27973_g1	.	25.34	24.61	28	22.93	24.18	12.81	203	111.07	59.07	162.08	176.16	162.37	27.64	20.42	43.16	14.1	20.55	19.11	225.71	238.8	180.4	540.01	133.79	369.04	270.4	287.35	219.92	298.06	250.86	276.79	44.23	69.89	109.05	70.33	65.13	327.08	379.64	309.18	258.42	267.74	271.44
GiantSalamander_f3p60_2047_transcript9600_g1	GTP-binding nuclear protein Ran, partial [Aptenodytes forsteri]	258.55	260.65	245.39	291.26	271.06	339.38	224.54	59.88	51.04	266.39	193.19	240.68	120.74	118.12	145.37	108.01	201.8	126.37	290.17	290.91	434.07	249.4	251.92	297.33	272.53	298.34	339.97	505.33	495.47	417.51	315.52	315.2	495.07	221.51	384.69	279.7	331.05	476.13	361.88	527.81	337.56
GiantSalamander_f17p60_3327_transcript18555_g1	PREDICTED: delta and Notch-like epidermal growth factor-related receptor [Chrysemys picta bellii]	513.47	539.85	520.43	489.08	347.44	479.46	22.98	8.38	4.45	16.16	13.78	14.2	0.06	0.08	0.02	0	0.01	0.07	0.2	0.08	1.67	4.57	0.17	0.33	0.41	0.34	0.54	0.51	0.67	0.53	0.01	0.04	0.08	0.05	0.03	0.16	0.31	0.1	0.06	0.15	0.27
GiantSalamander_f25p60_1311_transcript28589_g1	CD9 [Andrias davidianus]	8	9.08	23.5	5.68	9.7	5.47	62.34	17.06	13	51.03	17.75	50.86	36.61	31.37	42.81	3.91	35.19	19.14	284.48	256.92	370.38	130.15	78.82	192.8	317.16	348.69	415.88	466.5	537.58	392.53	376.22	372.04	328.72	116.19	272.31	253.25	305.47	449.28	287.63	394.33	147.9
GiantSalamander_f2p54_794_transcript29674_g1	PREDICTED: acyl carrier protein, mitochondrial [Myotis lucifugus]	192.78	237.21	184.37	206.29	362.36	300.65	406.08	240.99	172.32	537.35	479.8	445.66	77.51	86.78	148.53	139.7	72.8	113.94	111.12	156.66	167.77	95.63	175.46	196.86	149.94	177.85	153.44	131.81	130.05	141.38	198.72	228.78	292.95	197.47	362	138.68	141.07	191.22	188.17	152.9	240.79
GiantSalamander_f4p60_1510_transcript28056_g1	peroxiredoxin 6 [Xenopus laevis]	153.87	153.28	149.72	152.76	145.34	139.43	451.85	73.51	54.02	228.95	199.27	190.92	315.18	279.28	283.61	111.22	296.89	253.36	340.67	328.48	381.73	254.51	154.9	347.78	282.9	246.8	252.11	278.4	263.08	273.56	397.35	343.71	349.73	131.63	199.99	295.96	257.22	275.56	323.68	312.92	234.66
GiantSalamander_f23p60_3638_transcript17343_g1	tubulin alpha	62.49	88.62	61.85	432.93	433.91	535.24	4.62	5.18	3.05	11.62	19.41	10.65	1.63	0.87	1.77	2.83	1.08	3.2	1.9	0.97	2.67	27.07	9.62	13.84	2.77	3.56	2.94	5.75	10.34	7.94	5.18	8.39	3.89	8	10.49	1.35	1.31	1.81	3.62	6.78	6.74
GiantSalamander_f26p60_3414_transcript18163_g1	PREDICTED: probable ATP-dependent RNA helicase DDX17 isoform X2 [Chrysochloris asiatica]	159.34	192.02	204.28	235.36	163.63	184.91	75.41	170.4	140.63	90.46	184.67	95.59	23.5	16.62	48.03	303.78	25.96	57.26	67.67	59.3	52.17	62.56	294.1	148.69	58.69	46.71	50.97	57.84	50.32	47.34	60.12	65.32	67.34	264.72	234.09	85.86	46.98	60.65	123.97	102.8	398.25
GiantSalamander_f5p60_2616_transcript22522_g1	60S ribosomal protein L18 [Xenopus tropicalis]	204.83	202.98	192.81	183.57	246.95	206.45	345.98	164.98	172.92	335.81	313.95	276.68	118.44	110.41	150.22	232.67	156.47	155.15	231.6	265.05	242.48	288.6	421.61	528.54	235.76	221.87	225.3	251.1	287.02	265.12	205.27	188.15	262	199.96	247.65	330.26	242.96	274.8	468.24	457.89	534.03
GiantSalamander_f2p54_2517_transcript23242_g1	PREDICTED: proSAAS isoform X1 [Latimeria chalumnae]	414.71	406.53	260.31	533.64	204.36	462.87	0.08	0.09	0	0.2	0.15	0.11	0.99	0.72	0.27	0.68	0.49	1.15	0.54	0.42	1.47	8.46	0.29	1.38	0.48	0.47	0.76	0.28	0.2	0.7	3.62	2.17	1.59	0.96	3.2	0.31	0.3	0.34	0.7	0.26	0.65
GiantSalamander_f3p60_1783_transcript10915_g2	coagulation factor 10 precursor [Xenopus tropicalis]	0.08	0	0.02	0.12	0	0.09	0.17	0.1	0.24	0.1	0.75	0.2	387.75	213.79	306.67	54.01	533.57	352.91	0.07	0	0.06	0.05	0	0	0.08	0.01	0.04	0.03	0.07	0	0	0	0.04	0.04	0.07	0.04	0	0.07	0.02	0.12	0
GiantSalamander_f4p60_1495_transcript28095_g3	PREDICTED: organic solute transporter subunit alpha [Chrysemys picta bellii]	0.23	0.51	0.59	0.26	0.56	0.38	1.83	0.64	0.16	0.66	0.96	0.79	338.79	364.1	533.17	126.31	193.08	277.9	0.83	0.95	0.75	0.76	0.68	1.56	1.37	1.33	1.75	0.28	0.4	1.18	2.15	1.7	2.57	0.8	2.19	1.57	1.03	1.84	0.91	0.42	2.86
GiantSalamander_f2p60_525_transcript30584_g1	.	29.37	28.21	27.46	22.4	65.49	29.05	9.75	5.76	5	5.63	8.1	11.07	2.87	1.34	3.14	2.39	0.88	2.64	75.87	104.77	20.77	32.77	44.24	113.35	62.72	64.58	27.32	19.33	15.75	52.28	190.07	180.38	206.43	363.79	532.8	75.25	83.81	39.61	57.05	19.37	173.26
GiantSalamander_f5p60_1166_transcript29080_g3	uncharacterized protein LOC379593 [Xenopus laevis]	266.26	265.54	195.29	216.46	223.29	232.2	347.13	227.61	146.87	532.71	507.87	426.49	232.02	215.44	325.96	259.29	142.86	220.82	15.79	9.72	18.92	115.87	28.74	46	38.92	29.33	29.43	49.15	70.96	60.24	11.41	13.87	17.08	27.41	13.37	25.4	19.5	12.67	15.94	29.85	20.22
GiantSalamander_f2p22_2651_transcript5959_g1	PREDICTED: galectin-4-like [Xenopus tropicalis]	0.18	0.07	0.04	0.05	2.15	0.08	0.03	5.52	0.04	0.02	0.12	0.01	0.01	0.01	0	0	0.06	0.15	265.31	143.2	278.29	68.09	532.45	58.96	0.67	0.92	0.04	0.52	2.88	0.44	0.03	1.81	0.12	3.06	1.35	138.62	193.64	61.62	43.26	53.48	36.63
GiantSalamander_f4p60_490_transcript30705_g2	unnamed protein product, partial [Oncorhynchus mykiss]	1.36	1	1.58	1.79	4.37	1.61	5.82	4.62	5.55	4.17	5.83	2.19	85.99	39.1	104.49	254.39	61.99	144.83	76.92	78.32	76.44	58.02	531.92	138.46	78.87	66.12	96.39	124.03	101.83	54.56	7.16	9.46	11.77	18.87	16.93	214.5	79.15	67.28	222.46	187.4	195.88
GiantSalamander_f4p60_2362_transcript24132_g2	synaptophysin [Cynops pyrrhogaster]	290.7	133.11	308.57	233.22	15.8	530.29	0.37	0.3	0	1.24	0.74	0.64	0.08	0	0	0	0	0	0	0	0.08	1.91	0	0	0	0.05	0	0.15	0	0	0	0	0	0	0	0	0.17	0	0	0.07	0
GiantSalamander_f7p60_1571_transcript11497_g1	heterogeneous nuclear ribonucleoprotein H3 [Xenopus tropicalis]	187.48	189.72	168.39	231.04	171.55	265.5	143.67	109.75	84.96	202.66	161.23	205.93	80.21	66.13	125.74	109.5	86.51	121.53	302.39	265.19	408.73	166.08	266.62	308.25	221.66	256.73	311.91	353.47	281.02	343.51	333.21	346.9	516.42	322.97	530.22	255.66	228.06	412.25	307.62	439.81	439.34
GiantSalamander_f8p60_456_transcript30763_g1	uncharacterized protein LOC100049137 [Xenopus laevis]	118.22	115.64	111.19	138.23	239.28	193.76	180.06	175.78	149.28	410.83	442.67	329.76	56.95	65.94	144.75	172.31	84.95	100.13	85.21	96.6	123.08	91.65	185.93	169.71	108.45	114.42	115.55	153.96	155.05	146.92	113.87	92.16	184.85	187.25	298.06	118.19	93.97	143.42	158.64	211.5	196.16
GiantSalamander_f18p60_1177_transcript12872_g1	PREDICTED: PLAC8-like protein 1 isoform X1 [Lepisosteus oculatus]	0.79	0.51	0.68	1.53	1.55	1.07	2.72	0.99	0.51	2.11	3.64	1.9	43.29	26.34	48.8	64.24	72.68	102.62	6.49	2.9	6.58	1.62	2.03	1.62	1	1.2	1.34	1.51	3.06	1.61	2.77	2.65	2.43	5.33	11.1	2.74	2.62	3.22	1.41	2.26	3.37
GiantSalamander_f14p60_2217_transcript8092_g1	PREDICTED: keratin, type I cytoskeletal 12 [Alligator mississippiensis]	0.03	0	0.01	0.04	0.7	0.08	0	0	0	0.02	0.44	0.03	0.04	0.05	0	0	0	0.02	4.91	3.72	1.72	32.6	64.91	13.59	1.26	1	0.97	23.95	21.51	8.54	0.04	0.07	0.06	0.42	0.45	95.85	11.34	75.9	347.06	527.29	149.17
GiantSalamander_f5p60_1362_transcript12388_g1	PREDICTED: nuclease-sensitive element-binding protein 1-like [Balaenoptera acutorostrata scammoni]	402.95	414.1	399.5	477.21	509.4	480.96	54.78	28.2	16.96	121.63	120.47	101.36	5.99	4.45	7.78	11.7	6.66	10.71	10.01	10.61	12.62	27.52	15.47	23.64	9.96	8.28	8.71	16.61	25.73	19.78	6.91	8.22	6.73	12.93	15.52	7.12	7.02	4.84	9.16	12.99	18.24
GiantSalamander_f2p37_1660_transcript27533_g1	Darmin protein, partial [Xenopus laevis]	526.09	375.16	102.81	3.65	41.75	80.38	0.04	0	0	0.1	0.08	0.07	0.74	0.74	0.81	0.3	1.69	1.38	0.22	0	0.23	0.56	0.17	0.03	0.13	0.12	0.11	0.14	0.28	0.06	0	0	0.06	0.03	0.02	0.14	0.01	0	0.03	0.1	0.05
GiantSalamander_f11p60_2864_transcript4617_g1	PREDICTED: proactivator polypeptide isoform X7 [Aquila chrysaetos canadensis]	450.57	521.27	509	393.1	363.82	352.57	99.28	65.03	49.63	90.75	84.57	72.98	204.23	237.27	229.46	114.6	171.63	110.14	135.88	130.29	131.17	72.28	88.58	63.49	129.29	141.19	162.35	118.97	102.53	88.55	212.5	207.06	170.97	113.97	142.61	135.53	167.8	151.81	98.33	102.26	108.53
GiantSalamander_f10p60_2031_transcript26071_g1	PREDICTED: 14-3-3 protein zeta/delta [Calypte anna]	252.81	322.38	289.88	282.47	247.84	406.2	45.74	4.17	2.89	31.31	23.25	35.32	28.45	38.23	22.56	4.75	32.96	23.38	267.12	270.03	520.92	99.86	65.4	179.71	280.52	392.4	438.15	438.47	359.89	408.59	219.29	302.06	335.46	35.1	68.07	217.86	291.91	498.03	231.6	353.82	76.42
GiantSalamander_f3p60_1064_transcript13173_g1	putative ornithine decarboxylase antizyme variant 1 [Taeniopygia guttata]	124.97	125.02	96.7	138.29	206.57	227.23	235.31	58.39	36.73	144.46	85.01	117.35	86.87	100.54	63.64	31.46	148.9	99.64	266.35	288.44	386.04	129.76	120.7	260.42	238.04	278.54	272.83	328.04	301.28	316.11	306.4	307.17	379.32	91.5	168.79	248.74	265.73	451.7	376.71	359.4	168.61
GiantSalamander_f217p60_3254_transcript2293_g1	PREDICTED: protein-glutamine gamma-glutamyltransferase 6 [Tarsius syrichta]	0.2	0.12	0.15	0.23	1.1	0	0	0	0	0	0.18	0.09	0	0.08	0	0	0	0.18	96.06	77.07	159.85	20.49	109.2	170.88	74.98	75.52	49.94	166.8	72.58	134.67	0	0.25	0.01	0	0.07	9.93	7.02	59.52	519.78	323.76	106.62
GiantSalamander_f4p60_745_transcript30042_g2	.	0	0.2	0	0.07	0	0	0.12	0.12	0.07	0	0.16	0	173.83	126.37	519.59	319.84	164.04	136.07	0.04	0	0	0	0	0	0	0	0	0	0	0	0	0	0	0.04	0.25	0	0.08	0	0	0.04	0.05
GiantSalamander_f2p9_4836_transcript15805_g1	Unknown (protein for IMAGE:5440084) [Xenopus laevis]	0.66	0.76	0.67	0.95	0.17	0.09	0.09	0.16	0.17	0.11	0.39	0.06	298.13	256.06	276.94	519.49	317.55	497.38	0.2	0.23	0.59	0.6	0.58	0.31	0.33	0.11	0.15	0.14	0.7	0.42	0.02	0.09	0.08	0.15	0.18	0.46	0.25	0.26	0.34	0.29	0.62
GiantSalamander_f2p21_1861_transcript10685_g1	PREDICTED: core histone macro-H2A.2 [Chlamydotis macqueenii]	356.15	345.61	315.04	295.42	141.19	339.81	152.88	25.56	22.82	104.18	69.16	93.07	100.99	91.7	100.28	30.08	76.69	77.03	401.16	298.98	453.29	143.27	111.58	168.95	411.66	407.92	517.32	515.43	413.46	379.26	391.64	405.57	468.3	104.72	194.45	358.19	343.94	500.39	265.69	324.54	140.79
GiantSalamander_f6p60_2685_transcript5651_g1	PREDICTED: selenoprotein P isoform X2 [Marmota marmota marmota]	29.66	12.2	55.74	9.65	20.67	23.29	73.15	2.85	0.93	20.33	34.91	71.97	157.79	70.18	144.74	7.95	516.19	186.69	32.27	9.17	57.22	26.55	9.34	36.14	36.15	10.55	53.67	42.82	68.58	47.16	24.11	6.43	30.52	10.29	9.51	22.05	8.57	37.47	8.66	43.62	11.97
GiantSalamander_f5p60_1015_transcript13138_g1	eukaryotic translation elongation factor 1 delta (guanine nucleotide exchange protein) [Xenopus tropicalis]	90.57	123.24	55.21	73.25	75.71	113.79	165.2	167.45	130.4	216.75	140.52	226.12	72.6	87.11	88.6	185.12	59.78	128.41	160.79	264.81	124.93	115.26	177.63	457.94	148.06	198.74	105.54	90.82	93.78	181.58	168.2	204.97	186.51	119.5	375	249.17	228.79	142.33	307.71	178.48	514.64
GiantSalamander_f21p60_2419_transcript7471_g1	phosphoglycerate mutase 1 [Xenopus tropicalis]	413.29	441.73	450.86	349.12	513.34	481.05	188.84	84.87	47.9	164.41	142.83	173.58	33.48	31.03	34.38	25.28	20.34	26.66	54.75	41.11	86.44	28.33	25.36	31.65	62.06	61.04	69.03	78.06	46.47	77.42	109.5	100.22	115.15	43.59	100.11	38.34	37.75	73.12	34.35	40.29	39.79
GiantSalamander_f106p60_2099_transcript9274_g1	.	3.78	4.56	5.3	3.58	9.43	1.99	0.29	0.1	0.19	0.08	0.42	0.11	0.11	0.09	0.08	0.09	0.04	0.1	100.04	64.26	119.2	69.35	512.44	221.76	347.22	220.54	310.08	272.25	283.14	157.81	1.02	1.04	2.59	7.87	2.63	68.71	16.89	52.53	442.4	410.05	260.76
GiantSalamander_f14p60_854_transcript29740_g1	actin-related protein 2/3 complex subunit 3 [Xenopus laevis]	239.27	190.59	181.6	287.78	226.93	370.24	156.81	42.11	32.01	180.96	134.38	147.56	127.13	99.26	155.25	123.94	179.82	149.76	311.91	289.81	348.84	177.77	195.29	294.2	340.52	305.41	354.42	450.4	381.86	337.25	310.74	292.79	386.76	147.44	279.17	267.02	325.04	420	420.83	512.07	251.22
GiantSalamander_f3p35_810_transcript13868_g1	Chain A, Crystal Structure Of The Gaba(A) Receptor Associated Protein, Gabarap	410.69	511.02	497.4	457.58	271.32	443.77	194.39	50.96	27.12	283.24	222.39	154.87	76.91	76.46	136.94	58.81	60.11	91.08	178.33	159.26	164.56	112.17	78.36	127.57	164.17	155.44	153.74	92.89	113.15	92.46	212.51	207.47	171.68	89.33	133.28	211.27	142.49	124.36	149.83	86.64	117.86
GiantSalamander_f15p60_995_transcript13368_g1	PREDICTED: mitochondrial import receptor subunit TOM6 homolog [Anolis carolinensis]	143.51	156.57	143.78	197.17	316.71	166.93	292.47	162.1	112.68	509.84	390.45	291.83	83.67	81.56	111.72	118.84	153.56	101.85	104.86	121.35	179.96	132.37	181.56	181.91	111.78	120.87	114.41	82.75	179.66	145.04	119.23	119.34	191.71	147.3	188.13	149.4	104.52	170.85	258.82	290.3	168.27
GiantSalamander_f2p60_540_transcript30554_g1	.	154.56	157.76	175.87	42.14	70.67	52.22	220.42	185.23	167.44	99.97	81.62	72.59	87.39	79.6	221.66	44.01	54.27	39.69	147.18	196.93	331.73	64.65	112.28	101.48	200.55	189.8	213.44	72.08	61.51	70.79	193.63	202.39	506.68	76.59	131.84	217.28	203.93	310.37	110.24	101.92	139.3
GiantSalamander_f4p53_5227_transcript195_g1	.	0.06	0.04	0.02	0.16	3.04	0.14	0.03	0.05	0.08	0.04	0.22	0.01	0.02	0.03	0.01	0.16	0.05	0.13	120.86	327.18	96.42	27.44	79.18	26.28	1.18	2.45	1.44	17.11	19.04	15.17	0.05	0.02	0	0.54	0.19	446.22	192.16	164.33	506.01	229.73	290.59
GiantSalamander_f20p60_732_transcript13980_g1	protein transport protein Sec61 subunit beta [Xenopus tropicalis]	176.31	187.55	159.22	202.09	288.35	236.42	191.25	76.29	52.46	168.91	152.39	130.34	202.65	212.1	244.77	117.56	286.61	300.07	283.2	360	237.75	212.77	304.65	503.9	260.69	270.11	207.24	252.82	292.99	300.74	237.46	230.48	280.17	151.75	265.36	462.46	375.42	303.62	478.07	449.06	352.48
GiantSalamander_f9p60_724_transcript30119_g1	RecName: Full=Ferritin, lower subunit; Short=Ferritin L	139.1	125.44	136.85	131.67	140.04	157.42	289.02	46.78	128.8	149.52	168.75	129.3	41.9	28.24	62.37	81.47	64.89	37.37	35.28	61.63	49.35	50.61	58.91	44.07	32.02	31.14	37.38	41.48	47.31	37.03	120.37	94.02	177.16	45.47	107.5	28.34	37.99	28.66	28.86	63.05	41.73
GiantSalamander_f14p60_2426_transcript23514_g1	alanine--glyoxylate aminotransferase 2 [Alligator mississippiensis]	0.27	0	0.04	0.1	0.28	0.23	0.64	0.07	0.05	0.05	0.33	0	144.87	17.33	502.33	22.94	382.36	119.82	1.43	0.05	2.93	1.25	1.24	1.21	0.94	0.03	1.3	0.77	2.79	0.45	0.03	0	0.15	0	0.01	1.7	0.03	3.27	1.21	2.78	0.97
GiantSalamander_f20p60_495_transcript30592_g1	COX17 homolog, cytochrome c oxidase assembly protein [Xenopus tropicalis]	83.69	78.27	69.44	66.41	111.84	89.84	301.06	190.45	129.2	465.82	434.75	365.04	88.03	91	141.53	98.89	83.31	87.97	220.58	288.53	333.27	172	253.61	331.51	262.2	316.59	291.62	321.8	281.7	317.29	241.11	265.8	448.77	279.37	501.97	232.74	240.92	379.82	320.99	396.99	443.2
GiantSalamander_f3p38_1757_transcript27209_g1	adenylate kinase isoenzyme 1 [Gallus gallus]	67.94	72.97	76.56	57.06	39.23	86.08	10.53	15.06	21.49	9.42	19.47	8.87	2.59	2.34	7.41	15.01	3.08	10.51	19.87	3.01	36.4	294.43	74.59	126.55	67.46	73.05	50.13	82.43	112.06	100.75	105.83	105.53	41.37	61.17	64.8	8.27	2.51	2.25	5.34	4.62	10.13
GiantSalamander_f8p60_1580_transcript27812_g1	PREDICTED: calsequestrin-2 [Alligator sinensis]	0.58	2.6	0.32	2.66	3.36	0.21	333.68	254.67	139.9	475.92	500.17	423.22	0.06	0.04	0.2	0.48	0.01	0.21	15.45	0.1	34.29	230.99	10.42	77.51	170.54	130.57	137.82	235.44	324.11	312.13	2.93	8.09	6.48	15.36	5.12	11.63	0.2	0.06	0.05	0.25	0.21
GiantSalamander_f2p60_2366_transcript7686_g1	reverse transcriptase-like protein [Takifugu rubripes]	0.13	0.08	0.19	0.11	0.07	0.18	0.08	0.03	0	0.03	0.03	0.11	0.06	0.03	0.13	0.03	0.02	0.07	83.81	116.28	17.71	24.63	12.76	95.53	48.49	56.93	18.03	3.81	2.18	22.15	178.02	221.6	217.19	244.83	499.84	84.63	121.23	29.44	26.83	0.47	121.78
GiantSalamander_f10p60_1390_transcript12265_g1	PREDICTED: UPF0762 protein C6orf58 homolog [Caprimulgus carolinensis]	0.07	0.05	0	0.05	0	0	0.25	0.1	0.14	0	0.44	0	462.33	323.14	499.73	197.69	411.73	293.11	0.09	0	0.03	0.02	0	0	0	0	0.03	0	0.01	0	0	0	0	0.03	0.14	0	0.03	0	0	0.09	0.08
GiantSalamander_f95p60_1931_transcript26373_g1	PREDICTED: heterogeneous nuclear ribonucleoprotein H isoform X7 [Thamnophis sirtalis]	483.08	476.36	449.26	498.75	295.75	490.73	186.02	53.37	50.86	212.59	154.87	159.71	117.16	111.75	137.87	90.92	117.57	116.46	343.07	286.73	373.6	190.91	188.96	234.02	286.99	271.79	313.49	278.49	256.17	285.7	349.21	347.49	391.22	189.99	262.75	335.22	292.67	378.19	295.37	359.7	242.34
GiantSalamander_f33p60_6036_transcript15309_g1	PREDICTED: myosin-3 [Xenopus tropicalis]	0.16	0.06	0.31	0.15	0.89	0.03	1.63	0.14	0.09	0.86	0.02	0.01	0.01	0.02	0.03	0.05	0.02	0.23	40.27	0.1	104.94	498.61	28.27	211.86	115.76	100.45	82.76	141.31	163.14	193.4	3.53	8.12	4.85	8.4	2.88	13.11	0.68	0.06	0	0.05	0.46
GiantSalamander_f4p60_852_transcript13660_g1	PREDICTED: phospholipase A2 inhibitor and Ly6/PLAUR domain-containing protein-like [Xenopus tropicalis]	0	0	0	0	0.13	0	0	0.03	0.08	0.04	0.09	0	0	0.09	0	0	0	0	0	20.72	10.11	22.22	12.86	0	0	240.3	432.83	0	397.71	0	0.11	0.09	0	0	0	0	0.13	40.32	498.03	83.73	0.03
GiantSalamander_f154p60_3299_transcript18588_g1	PREDICTED: fetuin-B [Chelonia mydas]	0.01	0.01	0	0	0	0	0.04	0.12	0.04	0	0.12	0	432.13	497.83	280.32	37.89	170.76	291.94	0.03	0.04	0.02	0	0	0	0	0	0.11	0	0	0.01	0	0	0	0.03	0.02	0	0.01	0	0	0.07	0.06
GiantSalamander_f4p52_4379_transcript617_g1	PREDICTED: sodium- and chloride-dependent GABA transporter 1 [Pelodiscus sinensis]	497.38	482.96	445.94	472.16	330.5	385.37	0.65	0.13	0.02	0	0.15	0.14	0.02	0.03	0	0.03	0.01	0.02	0.07	0.04	0.94	2.49	0.14	0.16	0.06	0.04	0.06	0.11	0	0.04	0.07	0.07	0.07	0.07	0.01	0.06	0.11	0.02	0.01	0.03	0.24
GiantSalamander_f4p58_2368_transcript24154_g1	serum albumin precursor, partial [Plethodon wehrlei]	0	0.15	0	0	0	0	0.1	0	0.08	0	0.23	0	258.46	241.5	181.22	90.04	164.7	149.55	0	0	0.03	0	0	0	0	0	0	0	0	0	0	0	0	0	0.07	0	0	0	0	0	0.27
GiantSalamander_f12p60_963_transcript29528_g1	serine/arginine-rich splicing factor 3 [Alligator mississippiensis]	228.94	241.53	210.42	306.87	274.73	435.02	136.41	47.49	33.59	267.45	165.02	197.5	73.12	61.91	108.55	83.2	104.52	105.21	202.15	216.54	295.48	163.33	213.88	333.68	200.29	207.28	225.2	358.14	340.74	307.26	226	222.9	395.78	197.99	378.72	289.45	215.42	357.83	365.18	454.33	349.94
GiantSalamander_f2p60_1283_transcript12614_g1	PREDICTED: heterogeneous nuclear ribonucleoprotein A/B isoform X2 [Chrysemys picta bellii]	421.79	481.68	455.45	208	55.81	154.34	143.3	29.66	21.86	117.37	45.36	67.08	72.42	81.99	89.55	5.51	23.67	18.92	274.91	164.88	497.01	85.62	23.07	49.09	252.19	288.43	369.74	203.83	172.71	182.61	343.11	378.94	464.36	26.79	44.55	233.75	216.9	398.75	76.7	99.73	31.98
GiantSalamander_f2p35_937_transcript29602_g1	PREDICTED: alcohol dehydrogenase 1, partial [Tinamus guttatus]	0	0	0.15	0.26	0.45	0.11	0.03	0	0.15	0	0	0	16.03	14.29	28.6	0.36	10.69	7.79	18.71	27.08	5.33	6.21	496.98	54.1	31.06	18.12	47	46.62	50.43	14.11	2.62	1.21	5.95	60.51	41.16	14.92	8.24	16.96	82.16	196.56	360.42
GiantSalamander_f2p60_1201_transcript12874_g1	anterior gradient protein [Ambystoma maculatum]	0.3	3.45	2.6	0.16	3.57	0.33	0.1	0.08	0.02	0.1	0.06	0.17	2.06	0.38	2.5	0.23	0.47	1.26	210.84	163.67	332.13	34.51	29.03	78.93	146.26	200.27	181.47	83.37	89.72	176.74	364.14	372.34	495.11	87.1	182.81	192.59	178.11	493.16	139.69	111.18	83.56
GiantSalamander_f8p60_2357_transcript7859_g1	PREDICTED: kelch-like protein 41 [Erinaceus europaeus]	0.61	0.23	0.08	0.82	1.7	0.26	156.25	64.18	38.69	170.68	136.92	139.84	0.01	0.06	0	0.08	0.03	5.25	31.24	0.1	68.83	494.11	14.44	193.57	146.4	167.03	124.12	171.2	218.13	272.14	3.03	10.39	6.62	13.29	4.83	11.78	0.35	0.06	0.03	0.06	0.44
GiantSalamander_f3p60_3386_transcript18246_g1	Protein-glutamine gamma-glutamyltransferase E [Chelonia mydas]	0	0	0	0.3	0	0.05	0	0.19	0	0.15	0.14	0	0.09	0	0	0	0.07	0.01	9.19	62.8	0.93	12.41	0	102.76	6.04	19.34	0.72	94.96	0.44	17.54	0	0.57	1.98	0.53	0	1.17	13.23	21.43	492.39	79.67	0
GiantSalamander_f2p60_1379_transcript28470_g2	PREDICTED: alcohol dehydrogenase 1A-like [Rhinopithecus roxellana]	0.12	0	0.1	0.12	0.16	0.09	0	0.03	0	0.05	0.05	0	95.44	102.98	43.15	0.92	58	37.79	171.17	82.43	34	74.72	8.29	42.63	211.78	141.6	270.29	342.39	491.2	140.44	21.63	12.74	7.84	1.21	1.38	108.18	72.11	53.34	89.47	100.76	5.84
GiantSalamander_f17p60_475_transcript30735_g1	.	0.15	0.18	0.31	0.53	2.65	0.44	0	2.55	0	0	0.61	0.09	0	0	0.18	0	0	0	45.92	45.86	69.53	59.86	324.37	60.86	2.73	1.38	0.1	4.25	5.77	1.93	0.24	2.47	0.45	7.89	6.56	128.27	94.09	34.23	85.6	111.56	92.01
GiantSalamander_f2p30_3218_transcript19079_g1	PREDICTED: glycogen phosphorylase, muscle form [Xenopus tropicalis]	139.46	176.65	163.06	210.44	203.95	176.02	125.92	124.83	85.64	128.46	152.58	106.25	28.42	30.36	36.88	124.24	20.78	39.07	52.1	29.67	68.96	450.52	48.26	113.49	148.24	153.45	123.5	174.67	191.33	215.52	26.83	33.95	29.07	41.45	40.11	41.1	23.39	22.67	24.41	19.32	41.69
GiantSalamander_f18p60_1834_transcript26874_g1	C3 variant 1 [Plethodon cinereus]	1.49	1.46	0.76	3.15	1.75	1.78	5.05	2.44	0.64	4.18	1.96	4.93	0.81	0.35	0.22	1.16	0.19	0.54	152.56	146.51	79.53	31.12	75.84	122.18	249.8	239.3	139.24	144.18	87.16	160.86	56.29	46.46	20.91	16.25	51.99	100.53	76.81	45.76	300.37	75.74	153.69
GiantSalamander_f15p60_1018_transcript29349_g1	PREDICTED: thioredoxin-dependent peroxide reductase, mitochondrial [Sarcophilus harrisii]	196.51	210.36	194.01	181.91	201	190.85	473.97	179.32	151.22	485.28	316.24	380.65	160.73	154.14	177.6	72.6	137.51	139.25	158.28	165.63	177.77	173.72	123.57	243.25	177.21	174.76	163.5	179.89	185.7	188.76	200.09	200.99	241.88	82.17	135.61	220.84	158.82	173.58	223.15	194.58	199.53
GiantSalamander_f11p60_1687_transcript11219_g1	PREDICTED: actin, cytoplasmic 1 [Camelus dromedarius]	403.81	486.08	450.18	464.46	260.6	369.74	92.11	9.42	7.78	46.51	26.2	28.3	20.26	17.05	12.35	5.75	9.24	7.34	89.62	72.04	115.45	37.94	19.37	40.97	49.97	48.96	59.65	20.12	34.78	22.74	53.04	57.86	44.88	7.25	4.19	91.88	73.23	69.79	34.04	20.04	16.64
GiantSalamander_f5p60_1892_transcript10341_g1	MGC64588 protein, partial [Xenopus laevis]	1.8	0.1	0.37	0.21	4.9	0.12	148.67	74.83	56.4	196.07	197.61	125.84	0.27	0.11	0	0.4	0.17	15.11	4.15	0.01	11.14	35.08	1.58	9.2	51.84	62.33	50.41	97.78	137.38	120.22	0.52	1.51	1.72	4.06	0.64	4.1	0.1	0.22	0.04	0.06	0.51
GiantSalamander_f40p60_1962_transcript25965_g1	polyubiquitin-B-like isoform, partial [Coptotermes formosanus]	0.29	0.33	0.31	0.31	0.44	0.27	0.19	0.04	0.09	0.21	0.22	0.13	0.11	0.13	0.07	0.03	0.25	0.2	74.93	34.01	128.49	13.62	133.52	95.67	176.57	124.3	227.3	354.75	266.19	169.67	2.17	0.93	1.71	0.35	1.26	13.26	6.57	75.65	291.79	181.74	104.33
GiantSalamander_f3p38_2656_transcript22406_g1	gelsolin [Xenopus tropicalis]	53.83	62.93	65.67	53.18	53.94	47.73	320.56	139.11	107.12	426.19	370.46	318.31	20.67	16.3	20.17	27.04	12.74	16.8	82	63.66	112.69	104.28	75.68	98.46	53.42	48.07	50.79	49.53	74.97	60.04	45.28	46.17	45.27	36.47	26.85	115.94	76.94	70.34	118.13	94.21	79.65
GiantSalamander_f2p34_2031_transcript26106_g1	LOC100127856 protein, partial [Xenopus tropicalis]	0.24	0.22	0.06	0.09	0.08	0.1	0.23	0.09	0.09	0.13	0.23	0.04	423.82	394.88	242.08	169.65	162.25	483.1	0.02	0.08	0.01	0.03	0.02	0.01	0.02	0.03	0.02	0	0.06	0	0.03	0	0.01	0.04	0.04	0.03	0.12	0.02	0	0.05	0.18
GiantSalamander_f8p60_754_transcript13898_g1	PREDICTED: small nuclear ribonucleoprotein Sm D2 [Aotus nancymaae]	334.45	382.94	334.99	324.46	344.61	374.81	299.32	120.94	99.95	295.72	271.47	254.37	143.8	141.56	220.97	176.03	188.59	167.66	289.06	330.07	399.46	246.54	251.26	338.01	281.75	291.52	292.63	292.33	285.75	273.25	288.83	293.05	482.89	181.95	313.77	402.68	306.43	420.67	330.57	440.88	408.72
GiantSalamander_f24p60_1315_transcript28630_g1	PREDICTED: cysteine dioxygenase type 1 [Chrysemys picta bellii]	27.05	33.53	37.49	26.35	18.2	24.34	7	4.05	4.35	8.53	11.88	15.05	381.56	399.47	449.28	111.88	482.31	328.4	67.18	95.09	10.32	69.23	45.12	52.99	57.67	53.85	36.27	50.24	67.5	32.5	7.11	10.38	5.09	6.87	4.59	112.51	118.09	57.21	81.31	95	66.45
GiantSalamander_f2p60_570_transcript30492_g3	PREDICTED: heat shock factor-binding protein 1 [Astyanax mexicanus]	216.89	168.67	156.11	207.43	287.89	336.77	208.96	138.04	83.03	309.08	299.06	268.85	51.87	43.82	74.58	84.47	67.49	52.53	100.98	100.26	90.18	92.64	143.86	141.56	129.68	96.78	92.15	150.94	163.66	138.18	210.34	175.05	201.07	268.17	482.23	138.31	105.44	118.99	140.28	212.65	194.72
GiantSalamander_f2p42_2770_transcript5076_g1	PREDICTED: cold-inducible RNA-binding protein isoform X3 [Merops nubicus]	268.86	287.12	384.39	482.03	258.03	240.15	73.21	129.38	105.49	94.08	90.92	66.58	27.71	19.2	65.07	55.59	13.69	30.19	50.53	56.09	45.7	42.46	84.25	54.88	43.1	42.18	51.99	22.47	14.33	19.17	38.63	41.94	75.21	104.36	107.38	56.45	42.52	53.12	49.81	33.45	106.58
GiantSalamander_f3p23_2334_transcript8508_g1	PREDICTED: phosphate carrier protein, mitochondrial isoform X2 [Chrysochloris asiatica]	219.5	240.55	232.15	236.89	205.83	237.08	479.62	188.03	138.39	480.55	389.41	382.75	88.46	88.87	131.32	69.81	101.94	115.32	171.13	167.96	166.87	171.4	94.65	206.28	167.85	177.42	161.65	156.09	159.1	176.8	213.78	220.79	234.22	118.17	189.1	207.86	161.76	174.83	189.35	178.81	190.21
GiantSalamander_f4p60_2242_transcript25089_g1	PREDICTED: ADP-ribosylation factor 1 isoform X1 [Mandrillus leucophaeus]	298.52	288.1	284.88	325.62	287.69	446.89	91.05	33.4	22.32	85.01	56.87	71.83	32.17	35.39	36.12	10.96	18.58	16.03	135.9	132	174.91	70.83	66.42	85.8	128.33	147.16	146.42	145.83	117.37	137.47	145.81	139.86	179.03	103	190.88	122.36	155.03	163.61	124.72	105.34	112.93
GiantSalamander_f6p60_1047_transcript13238_g1	PREDICTED: ubiquitin carboxyl-terminal hydrolase isozyme L1 [Pelodiscus sinensis]	297.45	338.99	364.97	414.19	422.41	392.68	1.9	0.65	0.5	1.19	0.92	0.9	0.42	0.46	0.74	0.26	0.36	0.62	3.75	4.02	12.68	28.7	9.9	2.58	2.74	4.28	5	6.62	6.94	6.59	0.37	0.86	1.8	0.37	0.15	4.56	4.6	3.24	1.66	1.19	1.38
GiantSalamander_f15p60_443_transcript30791_g1	PREDICTED: protein transport protein Sec61 subunit gamma-like [Bubalus bubalis]	141	160.02	142.98	139.92	184.67	166.72	201.97	96.15	95.03	223.12	182.31	159.88	143.26	137.88	236.55	155.17	251.63	183.91	222.27	272.62	268.39	184.87	258.88	348.51	231.14	251.31	221.9	287.72	313.38	258.06	224.78	232.04	389.41	195.24	397.62	352.18	314.5	315.57	361.57	478.93	355.38
GiantSalamander_f2p41_2258_transcript8437_g1	PREDICTED: glutamine synthetase [Chelonia mydas]	59.34	33.09	49.5	28.04	477.37	31.76	2.6	19.72	11.32	3.31	23.42	8.83	1.29	0.67	17.14	11.73	4.47	0.68	34.94	50.76	16.34	9.1	183.38	67.63	33.34	14.4	10.39	16.54	17.64	9.51	22	22.43	38.28	221.72	372.19	49.87	29.42	14.48	29.33	95.79	394.63
GiantSalamander_f16p60_2027_transcript26086_g1	PREDICTED: basigin, partial [Alligator sinensis]	383.03	473.48	434.68	477.16	432.99	425.58	186.17	37.95	24.94	140.6	113.96	106.43	125.18	95.87	96.54	27.21	70.59	119.95	139.43	130.06	157.22	108.21	68.64	149.96	109.49	101.26	97.79	100.92	95.25	107.57	123.53	126.16	104.95	39.75	54.7	169.89	118.29	125.21	163.7	108.43	92.58
GiantSalamander_f10p60_614_transcript30377_g1	Chain I, Structure Of Appbp1-Uba3~nedd8-Nedd8-Mgatp-Ubc12(C111a), A Trapped Ubiquitin-Like Protein Activation Complex	255.76	245.26	244.34	296.07	476.66	398.41	256.71	202.85	158.12	360.71	354.19	306.38	83.16	86.78	144.19	145.15	90.61	90.76	143.32	178.8	225.34	112.9	210.85	214.48	156.52	167	160.36	192.89	184.58	172.89	170.81	154.95	313.07	181.01	279.51	196.04	142.19	232.25	193.06	260.15	256.15
GiantSalamander_f5p60_1811_transcript10736_g1	RNA binding protein with multiple splicing 2 [Alligator mississippiensis]	0.3	0.24	0.08	0.54	0	0.11	222.24	17.47	5.24	287.6	79.61	181.3	0.47	0.26	0.05	0	0.05	0.15	0.44	0.13	0.2	0.4	0.04	0.15	0	0.19	0.09	0.23	0.09	0.21	1.3	0.57	0.52	0.07	0.47	0.36	0.17	0	0.14	0	0.11
GiantSalamander_f25p60_5514_transcript15421_g1	PREDICTED: complement C5 [Chelonia mydas]	0.04	0.12	0.07	0.12	0.11	0.08	0.03	0.03	0.06	0	0.28	0.02	404.06	476.33	165.37	61.35	272.79	294.65	0.29	0.17	0.1	0.05	0.08	0.06	0.03	0.05	0.1	0.06	0.05	0.04	0.07	0.07	0.04	0.13	0.09	0.06	0.08	0.08	0.01	0.08	0.15
GiantSalamander_f6p60_2496_transcript23455_g1	ornithine transcarbamylase [Xenopus laevis]	0.17	0	0.22	0.67	0.29	0.82	0.06	0	0.06	0.16	0.36	0.2	475.43	476.3	280.94	45.95	315.97	224.89	4.57	3.53	3.97	9.45	3.93	9.25	7.71	8.01	6.55	12.25	11.27	9.81	8.33	6.09	4.69	2.49	5.59	3.32	3.14	3.69	6.85	10.05	6.71
GiantSalamander_f2p60_1840_transcript26987_g2	PREDICTED: voltage-dependent anion-selective channel protein 1 [Pelodiscus sinensis]	408.19	458.32	401.2	419.31	410.99	436.57	311.17	83.67	53.24	297.29	212.13	278.45	92.66	90.88	84.03	55.32	112.8	77.83	245.56	281.82	274.26	211.23	116.56	234.48	270.37	299.6	284.01	256.43	262.3	281.05	266.11	334.65	331.55	124.32	262.31	241.34	303.96	303.92	235.69	273.4	226.61
GiantSalamander_f9p60_1049_transcript13190_g1	Transcription factor BTF3 4, partial [Tinamus guttatus]	259.09	262.32	237.61	230.11	177.69	249.96	226.02	45.56	38	267.28	175.02	208.88	105.81	103.67	116.56	53.15	128.1	81.85	285.08	243.13	376.86	222.77	113.79	181.49	289.53	332.71	347.52	370.86	355.39	330.6	332.17	332.8	475.49	97.88	198.72	247.01	295.49	421.87	229.84	323.31	154.56
GiantSalamander_f56p60_2753_transcript5158_g1	Keratin, type II cytoskeletal 75, partial [Podiceps cristatus]	0.32	0.06	0.27	0.1	0.27	0.18	0.06	0.16	0.04	0	0	0.05	0	0.02	0	0	0.04	0.14	173.75	230.66	233.01	35.83	36.35	98.97	46.87	48.57	27.52	6.47	2.23	15.64	22.01	17.25	22.91	6.82	15.14	253.7	474.32	236.3	33.31	8.26	113.29
GiantSalamander_f119p60_2878_transcript4435_g1	PREDICTED: alpha-2-antiplasmin [Xenopus tropicalis]	0.04	0.02	0.02	0.04	0.02	0.05	0.04	0.16	0.09	0.09	0.27	0.08	245.42	232.72	352.3	473.63	142.69	329.07	0.03	0.04	0.04	0.03	0	0.02	0.02	0	0.02	0	0.01	0	0	0.01	0.01	0.04	0.05	0.02	0.02	0.01	0	0.06	0.05
GiantSalamander_f12p60_1349_transcript12433_g1	PREDICTED: maleylacetoacetate isomerase isoform X1 [Melopsittacus undulatus]	31.8	40.93	33.21	39.65	46.83	40.83	27.35	20.46	18.75	27.95	23.99	24.15	336.5	285.57	323.77	473.3	212.78	414.06	43.67	43.54	41.73	28.86	42.78	58.08	19.4	21.75	18.72	14.55	16.88	18.63	20.47	23.68	25.14	22.85	28.05	47.67	33.61	31.25	44.51	32.88	53.96
GiantSalamander_f2p34_5008_transcript15608_g1	PREDICTED: complement factor H isoform X1 [Rattus norvegicus]	10.11	0.86	5.29	0.23	0.75	1.47	71.42	10.69	7.26	74.44	43.1	56.36	408.87	472.51	124.92	21.41	440.03	458.56	0.96	0.81	1.18	1.66	1.8	0.33	0.05	0.07	0.22	0.07	0.13	0.08	3.6	3.16	1.05	1.06	1.54	1.99	2.1	1.27	0.79	2.97	1.21
GiantSalamander_f2p44_2308_transcript24562_g1	Aldehyde dehydrogenase X, mitochondrial [Myotis brandtii]	21.31	39.03	23.13	44.14	40.51	19.42	1	2.36	0.14	7.44	3.37	0.85	472.01	451.89	285.47	74.61	339.23	369.2	2.78	35.24	2.71	11.71	39.26	0.95	1.05	4.45	0.9	1.33	3.79	2.1	1.57	10.45	1.49	3.42	0.87	3.24	47.67	4.51	14.39	8.14	2.53
GiantSalamander_f16p60_772_transcript30004_g1	H2afvl protein [Danio rerio]	316.88	370.91	298.55	384.24	275.83	469.56	111.99	72	47.21	209.64	168.27	174.82	42.41	39.28	69.7	33.96	44.48	44.96	153.5	164.87	159.12	101.53	170.75	176.53	150.53	166.82	171.94	192.43	179.28	166.08	168.1	173.59	280.42	174.8	296.93	176.3	176.81	229.05	180.97	209.98	202.61
GiantSalamander_f3p31_4300_transcript16174_g1	PREDICTED: ATP-binding cassette sub-family B member 5 isoform X3 [Anas platyrhynchos]	0.11	0.13	0.13	0.08	0.09	0.04	0.03	0.04	0.01	0.03	0.01	0.03	0.03	0.02	0.02	0	0.04	0	70.27	66.41	32.99	11.22	5.88	12.59	65.68	79.37	83.96	31.25	33.11	20.31	457.97	467.43	204.62	49.78	88.64	40.95	72.07	73.17	27.11	18.03	10.35
GiantSalamander_f4p60_709_transcript14120_g1	PREDICTED: small EDRK-rich factor 1 [Pteropus alecto]	29.03	27.22	28.72	102.08	164.34	118.3	9.47	8.04	5.58	36.02	29.86	29.15	1.19	2.77	2.82	8.72	11.09	8.15	4.2	6.19	6.13	22.1	29.13	26.97	4.66	5.4	4.11	24.11	27.47	20.62	4.34	5.21	7.35	38.61	70.32	6.01	4.91	4.84	30.39	31.07	48.07
GiantSalamander_f4p60_749_transcript30045_g1	GM20210 [Drosophila sechellia]	0	0	0.28	0	0.5	0.13	0.05	0.07	0	0	0.16	0	0	0	0	0	0	0	206.46	89.98	463.48	15.4	84.47	133.92	260.5	195.87	346.62	88.91	143.99	91.87	1.3	1.18	8.58	0.88	0	81.51	41.9	345.87	254.31	101.21	98.44
GiantSalamander_f7p60_1608_transcript11575_g2	keratin, type I cytoskeletal 18 [Xenopus tropicalis]	42.34	39.43	39.08	17.86	18.6	16.98	138.78	57.77	25.18	90.62	70.81	62.9	222.13	252.78	386.85	389.86	224.97	367.07	23.45	6.33	121.87	52.2	141.8	37.46	5.04	5.04	6.23	14.32	8.83	27.69	24.26	26.17	37.97	44.72	42.05	33.48	11.88	23.34	37.43	35.43	27.23
GiantSalamander_f17p60_2905_transcript4516_g1	ADP ribosylation factor 1 [Xenopus tropicalis]	367.16	358	366.67	295.71	148.59	341.25	176.95	35.13	21.81	134.85	76.84	98.61	153.4	170.78	112.08	31.5	142.6	103.53	321.82	270.13	299.92	174.63	77.26	147.73	283.5	282.17	314.62	203.2	214	218.95	462.22	432.49	343.24	87.38	151.54	306.02	320.34	331.76	194.99	161.14	125.26
GiantSalamander_f8p60_531_transcript30533_g1	PREDICTED: NADH dehydrogenase [ubiquinone] 1 alpha subcomplex subunit 3 [Pseudopodoces humilis]	100.07	112.38	100.6	132.23	212.9	163.92	251.51	240.69	180.32	418.41	399.61	340.17	53.76	45.66	83.82	55.14	65.39	79.02	64.31	79.85	77.97	90.64	140.64	184.83	80.93	68.82	75.79	90.09	96.29	96.69	70.53	70.75	104.61	126.59	185.97	100.3	73.4	81.21	157.53	137.07	174.59
GiantSalamander_f2p20_995_transcript29424_g1	PREDICTED: uricase-like isoform X1 [Latimeria chalumnae]	0	0	0	0.08	0	0	0	0	0.06	0.03	0.53	0	292.2	265.3	212.74	283	459.17	407.68	0.17	0	0	0	0.02	0	0	0	0.02	0	0	0	0	0	0	0.03	0.09	0	0	0	0	0.12	0
GiantSalamander_f97p60_2180_transcript7932_g1	PREDICTED: ras-related C3 botulinum toxin substrate 1 [Lepisosteus oculatus]	361.77	321.29	328.26	420.89	319.39	444.7	93	40.14	25.26	82.91	53.56	72.97	56.35	60.5	45.21	14.57	69.16	36.1	182.8	147.08	257.18	119.05	92.81	115.48	168.64	183.53	205.29	249.19	230.76	216.8	214.85	217.94	206.7	102.92	172.74	148.19	185.32	267.98	166.84	205.03	115.99
GiantSalamander_f2p24_3223_transcript19257_g1	PREDICTED: gamma-enolase isoform X2 [Chelonia mydas]	304.47	404.61	420.98	459.07	342.9	276.89	10.76	4.79	3.22	9.93	8.39	8.22	0.57	0.55	0.57	0.6	0.41	0.39	1.7	0.68	4.58	19.85	1.37	2.53	1.66	1.37	1.5	1.86	2.44	1.96	0.73	0.91	0.78	0.74	0.86	1.26	0.85	0.97	0.62	0.74	1.06
GiantSalamander_f45p60_1048_transcript13148_g1	Chain E, Crystal Structure Of The Heterotypic Nucleosome Containing Human Cenp- A And H3.3	298.07	345.83	310.9	310.91	256.88	362.68	99.55	63.62	51.39	149.84	120.61	120.45	31.79	28.85	43.99	24.77	46.6	46.31	170.79	151.5	177.26	142.15	210.02	263.85	178.57	207.54	205.92	412.12	320.98	319.85	203.9	201.56	301.49	150.22	299.24	161.45	130.14	252.86	376.59	457.47	259.36
GiantSalamander_f6p60_486_transcript30723_g1	cytochrome b-c1 complex subunit 8 [Xenopus tropicalis]	314.18	338.28	275.98	381.03	423.67	426.04	291.62	88.29	51.48	455.9	302.23	336.63	106.76	70.21	72.91	37.53	98.61	97.74	108.05	88.33	116.35	153.48	60.12	110.52	153.58	156.2	142.88	246.9	225.07	204.42	176.58	150.35	178.15	58.78	149.9	112.92	108.69	123.22	142.77	159.17	74.59
GiantSalamander_f6p60_652_transcript30258_g1	PREDICTED: glia maturation factor gamma [Chrysemys picta bellii]	332.34	339.83	310.78	334.86	380.47	455.68	242.89	137.16	116.37	384.69	350.83	297.73	188.28	148.78	262.11	327.14	209.69	222.38	199.33	208.9	261.28	153.07	323.94	332.95	230.97	227.29	241.92	313.62	299.44	254.16	180.24	182.69	276.05	203.13	317.41	228.84	195.61	270.05	366.92	426.1	332.22
GiantSalamander_f25p60_2333_transcript7753_g1	5'-aminolevulinate synthase 2 [Xenopus laevis]	90.18	88.44	54.45	93.42	91.13	98.56	454.91	26.74	54.52	84.48	92.03	70.7	36.64	28.42	18.49	53.3	50.16	29.94	78.39	107.07	26.42	71.66	54.06	71.21	45.7	34.9	17.17	19.46	46.75	46.54	219.42	184.96	71.12	46.63	110.72	45.86	45.71	14.31	30.31	28.45	79.97
GiantSalamander_f14p60_1120_transcript29142_g1	ADP-ribosylation factor-like protein 6-interacting protein 1 [Xenopus tropicalis]	288.86	333.73	315.8	304.28	454.68	294.89	70.61	74.21	63.73	98.78	89.99	109.35	66.81	59.74	86.1	38.27	84.53	53.72	81.07	78.9	92.95	44.42	71.16	44.48	82.55	81.22	94.96	97.34	88.28	73.7	153.38	146.89	160.83	114.92	172.49	82.64	85.99	103.91	64.98	76.32	81.73
GiantSalamander_f4p60_658_transcript30221_g2	PREDICTED: 5-hydroxyisourate hydrolase-like [Clupea harengus]	1.01	0.73	2.44	2.43	4.67	3.36	4.42	2.39	2.47	3.41	12.04	2.55	260.5	214.12	352.64	242.8	379.15	373.19	6.47	1.84	1.96	4.79	27.75	16.97	1.79	1.17	0.27	7.26	4.64	2.57	0.15	0.23	1.13	16.66	19.39	10.4	3.1	3.94	6.82	20.91	37.15
GiantSalamander_f126p60_579_transcript30401_g1	PREDICTED: thymosin beta-4 [Alligator mississippiensis]	70.23	91.43	95.91	91.43	135.85	101.26	18.2	7.63	5.52	23.15	14.03	13.27	9.56	5.69	10.48	6.25	6.99	8.09	293.04	277.67	278.71	130.14	230.74	334.96	236.9	220.6	223.35	229.13	221.6	203.02	122.98	125.6	198.93	102.02	130.09	453.73	343.4	355.71	373.72	303.94	343.08
GiantSalamander_f12p60_3364_transcript2417_g1	PREDICTED: protein-glutamine gamma-glutamyltransferase E-like [Chrysemys picta bellii]	0	0	0	0	0	0	0	0.08	0.1	0	0	0	0	0	0	0	0.06	0.03	131.39	72.16	127.1	27.38	16.16	144.45	112.24	106.55	57.58	201.73	84.79	114.75	0.02	0	0	0	0.12	13.65	14.06	50.06	453.68	234.33	11.87
GiantSalamander_f14p60_849_transcript29763_g1	.	0.05	0	0	0.26	0.47	0.23	0	0.03	0.05	0.1	0.19	0	0	0.06	0	0	0	0.03	100.71	86.66	9.63	30.09	113.92	123.46	326.92	263.65	424.51	452.86	292.68	249.91	0.25	0.09	0.07	4.09	0.76	141.62	33.28	98.45	151.91	216.12	160.63
GiantSalamander_f18p60_1985_transcript26386_g1	PREDICTED: LOW QUALITY PROTEIN: T-complex protein 1 subunit zeta [Bison bison bison]	326.29	353.12	324.26	350.5	320	354.24	338.25	99.95	75.86	423.1	300.95	339.93	79.95	74.36	86.44	59.18	105.03	77.22	255.08	241.91	330.33	292.99	141.73	275.78	239.57	255.94	286.08	262.53	256.53	283.39	444.72	447.9	452.64	163.21	288.89	271.59	255.32	344.33	244.55	272.05	215.06
GiantSalamander_f5p60_1110_transcript13027_g1	PREDICTED: protein FAM3B isoform X4 [Alligator sinensis]	1.47	1.53	1.61	2.05	3.56	1.16	10.76	2.86	1.9	15.33	6.94	8.73	30.08	24.36	25.82	6.17	35.55	24.21	201.47	236.17	130.79	64.62	93.53	127.26	253.3	237.81	230.15	212.6	216.58	148.45	451.44	388.45	355.93	142.94	270.14	180.83	226.13	198.84	238.48	195.01	121.74
GiantSalamander_f44p60_1695_transcript26870_g1	cytochrome P450, family 4, subfamily b, polypeptide 1 [Xenopus tropicalis]	0.48	0.71	0.57	0.18	0.58	0.07	0.31	0.04	0.15	0.08	0.19	0.06	425.11	450.47	417.48	139.6	166.43	195.55	81.95	70.03	31.25	10.5	15.1	20.82	71.67	84.58	50.96	11.11	13.62	23.8	253.24	225.48	127.8	56.8	79.78	59.32	67.97	53.93	26.55	10.98	19.71
GiantSalamander_f54p60_4388_transcript563_g1	cytochrome P450 family 1 subfamily A member 1 [Xenopus laevis]	10.31	8.45	5.01	7.77	7.93	5.35	55.21	10.51	7.48	22	17.26	20.65	361.49	424.93	197.5	166.2	259.27	448.74	12.7	17.11	4.77	7.06	4.64	4.62	9.78	7.59	4.52	3.19	6.37	3.87	50.05	46.4	23.32	8.69	17.21	7.27	8.87	3.57	3.42	5.4	4.69
GiantSalamander_f2p25_4427_transcript16097_g1	PREDICTED: serine/arginine repetitive matrix protein 5-like [Austrofundulus limnaeus]	0.26	0.06	0.21	0.22	1.07	0.16	3.59	1.05	0.46	0.67	0.62	0.4	0.18	0.27	0.52	0.14	0.2	0.22	108.38	150.68	139.27	52.5	187.34	170.63	237.93	237.16	299.26	355.61	194.87	212.54	39.18	48.62	76.95	31.69	41.52	74.55	101.54	102.84	448.3	340.48	193.09
GiantSalamander_f4p54_2632_transcript22959_g1	PREDICTED: neuron-specific protein family member 1 [Fulmarus glacialis]	428.14	318.44	407.57	326.32	228.91	447.33	7.15	1.75	0.52	4.53	2.71	5.17	0.7	0.92	0.45	0	0.6	0.26	1.38	0.56	2.03	4.83	0.58	1.41	2.79	2.11	2.34	2.04	4.33	2.7	1.19	1.2	1.02	0.55	0.53	1.3	2.11	0.96	0.32	0.59	1.07
GiantSalamander_f2p60_919_transcript13582_g1	Neurotensin/neuromedin N precursor [Rana catesbeiana]	302.2	303.76	255.14	175.58	268.6	336.15	0.56	0.39	0.12	0.64	0.54	0.35	0.26	0.08	0.51	0	0.03	0.26	4.62	8.11	5.44	7.35	17.43	3.51	0.2	0.3	0.11	2.98	4.39	2.77	0.06	0.12	0.19	0.65	0	12.45	3	4.35	63.06	69.32	35.14
GiantSalamander_f14p60_602_transcript30343_g1	PREDICTED: NADH dehydrogenase [ubiquinone] 1 alpha subcomplex subunit 11 isoform X1 [Lepisosteus oculatus]	160.3	182.58	168.54	167.68	222.25	216	362.26	155.93	101.25	445.04	303.44	413.66	118.19	111.61	164.2	36.61	129.16	119.75	141.18	182.75	158.02	142.27	137.44	216.52	193.35	203.82	178.63	228.2	236.14	223.66	164.89	164.15	245.02	99.61	185.21	240.39	174.42	211.1	192.65	220.73	164.97
GiantSalamander_f19p60_1673_transcript27477_g1	heterogeneous nuclear ribonucleoprotein A2/B1 [Alligator mississippiensis]	77.81	69.9	78.15	259.11	198.48	246.89	28.37	7.55	8.09	88.53	68.17	71.17	21.17	19.03	36.62	35.03	47.78	49.21	39.88	34.06	52.58	74.3	107.3	87.43	41.16	36.72	61.1	130.14	115.39	93.89	44.71	42	75.44	98.41	139.71	39.61	36.6	66.23	122.43	157.84	132.4
GiantSalamander_f11p60_1837_transcript26786_g1	PREDICTED: T-complex protein 1 subunit alpha [Xenopus tropicalis]	393.17	443.12	393.94	395.16	318.21	382.03	207.16	104.45	84.8	227.01	178.62	184.22	80.99	83.98	102.9	95.72	111.63	82.82	192.77	197.57	239.19	229.43	172.35	270.44	213.13	212.83	211.42	218.86	220.26	227.87	319.47	330.62	334.87	179.74	282.32	216.52	206.87	229.99	232.96	247.78	270.71
GiantSalamander_f17p60_1743_transcript11108_g1	PREDICTED: cytochrome P450 2G1 [Xenopus tropicalis]	0.03	0.02	0.02	0	0	0.02	0.06	0.04	0.07	0	0.32	0	352.06	384.27	425.04	161.76	276.96	442.95	0.08	0.07	0	0.21	0.14	0	0	0	0.08	0	0	0	0	0	0	0.01	0.26	0	0.03	0	0	0.03	0.09
GiantSalamander_f2p60_485_transcript30707_g2	.	113.73	70.27	65.45	54.84	120.93	91.57	193.05	82.34	124	96.26	137.24	117.74	95.61	45.87	71.26	48.61	168.6	74.4	165.64	104.36	124.93	137.42	220.5	299.87	189.47	111.06	114.91	291.84	346.86	223.87	150.73	90.12	171.58	139.21	166.05	194.48	109.19	153.05	175.64	442.18	262.37
GiantSalamander_f2p59_431_transcript30843_g1	UPF0390 protein zgc136864 [Danio rerio]	150.01	144.57	94.47	149.15	178.62	109.12	277.82	155.62	280.92	348.44	442.13	167.44	85	78.66	85.05	360.63	59.4	56.41	147.4	187.38	106.5	137.25	320.37	115.8	159.55	152.65	67.3	117.99	117.43	71.61	147.75	150.16	110.63	253.57	119.03	161.59	127.79	90.95	212.9	195.35	157.88
GiantSalamander_f7p60_1610_transcript27765_g2	PREDICTED: GDP-mannose 4,6 dehydratase [Capra hircus]	16.26	20.22	16.89	24.46	19.98	23.98	10.31	3.5	2.91	12.92	9.05	10.29	3.61	2.29	4.2	3.95	2.55	3.78	189.02	202.84	87.37	68.12	87	146.87	183.26	177.14	167.89	135.68	120.25	120.33	309.97	260.24	198.19	131.88	264.64	195.54	191.71	147.96	222.65	173.84	145.68
GiantSalamander_f2p60_678_transcript14085_g1	PREDICTED: transthyretin [Columba livia]	0	0	0	0	0	0	0.05	0	0.04	0	0.33	0	310.57	439.82	350.34	87.03	329.77	318.42	0.1	0.1	0	0	0	0	0	0	0.18	0	0	0	0	0	0	0.05	0	0	0.05	0.1	0.05	0.08	0.05
GiantSalamander_f2p41_902_transcript13554_g1	cilia- and flagella-associated protein 20 [Xenopus tropicalis]	64.52	65.73	51.9	50.11	46.41	58.62	29.21	18.65	14.7	51.54	40.69	45.9	7.09	6.37	13.2	14.07	5.29	7.11	17.85	19.49	23.88	11.77	22.42	17.62	18.98	17.71	20.64	17.69	15.16	14.91	268.72	263.52	147.52	163.45	439.17	21.19	18.32	22.81	18.14	18.02	27.45
GiantSalamander_f2p18_2358_transcript24234_g1	PREDICTED: elongation factor 1-alpha 1-like isoform X1 [Ovis aries]	8.62	12.88	10.96	96.33	78.72	89.23	3.74	3.06	2.8	44.72	27.57	34.02	2.29	3.71	2.51	7.12	23.69	23.05	1.08	1.82	1.86	29.84	5.2	14.58	1.5	2.15	1.6	14.21	14.64	16.8	1.1	1.36	1.27	5.42	12.48	1.26	2.02	1.12	10.89	6.73	14.63
GiantSalamander_f2p58_3279_transcript18684_g1	beta amyloid peptide precursor	323.82	418.52	436.61	386.57	149.53	359.33	3.29	4.97	3.86	4.5	4.34	4.47	1.56	2.4	6.01	2.04	1.03	1.94	3.42	10.86	7.04	8.39	8.34	6.48	2.76	5.51	3.61	5.38	2.4	2.93	2.44	5.59	10.14	10.71	14.19	2.91	6	6.42	5.25	6.47	9.74
GiantSalamander_f33p60_5481_transcript15411_g1	C4 protein [Xenopus laevis]	2.53	3.07	2.62	2.81	2.02	2.8	0.41	0.15	0.34	0.24	0.48	0.2	209.15	191.17	265.54	428.74	182.26	435.52	0.16	0.15	0.16	0.13	0.2	0.1	0.07	0.06	0.09	0.03	0.06	0.06	0.11	0.12	0.13	0.17	0.29	0.15	0.12	0.13	0.11	0.14	0.19
GiantSalamander_f2p54_1289_transcript12594_g1	.	263.49	296.08	295.79	215.94	216.79	231.95	127.91	153.72	102.98	126.81	158.64	134.17	45.7	31.73	107.56	220.53	46.03	64.18	165.33	159.65	184.21	93.59	261.46	200.77	107.94	97.75	105.79	82.16	59.86	92.2	118.34	133.06	241.52	320.27	435.42	184.54	127.82	178.11	187.18	202.38	369.69
GiantSalamander_f12p60_2447_transcript23936_g1	musculoskeletal embryonic nuclear protein 1 [Xenopus laevis]	4.19	2.66	2.5	4.29	2.38	2.01	174.55	35.14	19.99	227.83	101.78	160.29	0.15	0.27	0.26	0.01	0.37	1.51	47.31	15.43	60.04	427.88	11.54	118.96	122.97	145.52	82.68	171.26	185.36	203.84	9	20.99	11.94	10.57	6.76	57.91	28.66	21.74	34.54	20.2	16.15
GiantSalamander_f4p60_874_transcript29748_g1	PREDICTED: translocon-associated protein subunit gamma [Condylura cristata]	130.63	138.09	127.15	116.13	117.04	131.5	133.58	67.08	45.36	171.55	138.37	143.74	205.92	241.86	336.9	137.1	336.2	280.21	224.17	270.46	245.61	243.67	247.59	311.99	232.93	235.62	239.85	259.45	310.11	269.28	208.95	211.38	286.41	159.72	255.01	330.97	381.54	370.96	390.57	434.52	369.45
GiantSalamander_f7p60_1576_transcript27837_g1	PREDICTED: glutathione S-transferase theta-1-like [Chelonia mydas]	5.21	6.84	11.2	8.07	8.04	9.04	1.97	0.75	0.72	4.15	5.43	2.9	311.68	324.08	433.6	288.28	234.22	391.66	21.84	32.59	16.75	14.42	17.45	22.59	17.17	20.68	16.8	10.3	20.04	20.99	23.53	41.2	29.61	24.64	40.04	18.51	22.48	17.62	25.99	15.89	25.99
GiantSalamander_f6p60_627_transcript30351_g1	huntingtin interacting protein K [Xenopus laevis]	178.66	184.3	98	227.14	175.63	242.95	201.96	121.47	51.31	263.22	146.68	220.02	85.05	81.23	96.03	242.74	40.61	104.11	197.52	216.12	186.07	131.49	209.94	248.12	185.82	186.97	115.27	89.45	77.93	178.67	211.46	216.15	200.48	163.01	425.26	175.99	134.3	160.41	237.92	127.05	432.62
GiantSalamander_f29p60_2002_transcript9744_g1	Chain A, Solution Structure Of Human Srsf2 (Sc35) Rrm	410	417.09	312.73	303.19	225.25	320.66	163.75	119.99	120.28	157.21	133.91	128.59	73.24	71.93	83.46	70.44	48.45	74.76	238.63	224.86	229.45	99.33	187.45	179.33	173.69	190.81	147.37	97.05	88.76	129.25	245.2	305.28	286.82	270.13	431.92	270.67	212.71	240.91	220.5	206.53	259.32
GiantSalamander_f2p20_2552_transcript6680_g1	annexin A4 [Xenopus tropicalis]	11.13	10.13	8.99	11.06	7.78	10.64	25.66	8.15	3.87	39.21	24.47	27.51	390.12	431.88	412.85	134.64	236.67	218.27	53.67	51.49	55.95	39.36	27.42	45.39	55.38	57.17	63.43	61.9	61.15	57.82	48.45	49.48	49.79	20.61	38.48	53.87	61.55	67.52	52.32	61.35	46.12
GiantSalamander_f32p60_2227_transcript8559_g1	PREDICTED: tropomyosin beta chain isoform X7 [Gallus gallus]	83.45	79.6	80.7	84.61	66.17	98.43	149.4	110.47	64.49	156.31	123.1	128.07	27.92	21.04	38.38	176.02	41.5	70.04	117.57	82.64	128.95	108.25	166.45	195.23	57.18	53.04	39.05	83.25	66.24	88.69	46.44	44.22	36.44	112.82	115.33	114.11	64.83	72.54	172.72	156.36	328.81
GiantSalamander_f3p60_582_transcript14315_g1	PREDICTED: homeodomain-only protein [Aotus nancymaae]	4.07	10.74	11.94	9.48	20.63	3.58	254.44	308.16	204.17	427.41	428.6	301.83	0.41	0.86	1.45	1.59	2.07	1.92	2.28	1.53	1.77	2.98	20.39	6.2	9.99	12.72	21.4	26.55	22.49	8.44	3.32	4.12	3.87	14.61	19.16	1.64	0.61	1.93	36.88	29.21	17.16
GiantSalamander_f6p60_3813_transcript17094_g1	Rpl11 protein [Pachytriton brevipes]	134.06	128.75	122.97	122.48	157.08	149.47	229.4	96.3	73.1	224.15	172.78	183.92	97.44	99.32	121.69	109.82	154.35	116.11	186.33	214.69	239.02	203.91	217.47	351.6	188.18	178.8	177.32	234.3	258.28	225.81	160	152.51	215.4	114.68	158.05	278.02	208.93	244.73	343.89	426.97	306.74
GiantSalamander_f115p60_3144_transcript19199_g1	major vault protein [Xenopus laevis]	29.45	38.7	33.66	41.83	40.01	35.59	75.51	40.99	32.61	104.8	96.4	75.12	47.16	31.07	59.15	109.13	46.77	62.04	201.91	229.58	130.46	104.29	182.94	292.02	121.65	131.06	85.97	59.31	69.59	85.3	337.24	355.56	271.11	239.67	304.77	261.93	167.98	147.85	184.32	92.65	363.85
GiantSalamander_f17p60_1340_transcript12432_g1	PREDICTED: urokinase plasminogen activator surface receptor-like [Xenopus tropicalis]	0.24	0.72	0.25	0.79	1.65	0.9	0.15	0.39	0.27	0.31	0.9	0.39	0.14	0.18	0.45	1.6	0.2	0.51	95.44	50.06	176.2	14.72	180.08	150.91	84.27	63.36	145.3	67.07	80.84	56.22	1.39	1.32	3.07	3.26	3.25	48.54	9.68	76.92	165.12	80.59	186.84
GiantSalamander_f2p12_1695_transcript27184_g1	.	297.57	297.85	302.42	242.95	242.89	258.37	239.15	76.2	95.71	144.06	168.49	168.48	66.12	54.46	79.15	93.08	84.66	65.33	194.71	205.32	162.29	172.41	341.16	254.88	174.37	165.06	191.26	199.21	161.73	173.45	195.16	225.58	266.85	167.16	261.89	191.73	175.41	221.61	361.49	382.69	425.95
GiantSalamander_f8p60_639_transcript14211_g1	PREDICTED: prefoldin subunit 1 [Sarcophilus harrisii]	285.4	292.24	271.59	306.27	383.42	334.87	265.88	103.11	66.71	267.1	242.56	223.05	111.83	101.57	144.75	139.93	196.83	108.78	167.34	208.83	187.89	223.15	189.03	235.58	205.26	192.46	196.38	245.63	287.47	200.44	173.2	159.06	237.55	144.8	223.79	202.62	217.76	241	250.41	375.25	269.53
GiantSalamander_f3p60_617_transcript14284_g1	PDZ and LIM domain 7 [Xenopus laevis]	6.32	6.79	5.15	3.2	6.25	4.29	39.19	114.87	54.81	19.69	22.34	19.1	0.05	0	0.1	0.59	0	11.81	35.26	0.47	51.64	346.67	13.19	95.73	158.76	179.32	105.99	131.06	124.64	163.46	1.34	3.8	2.83	3.06	1.52	12.86	0.06	0.12	0	0.05	0.89
GiantSalamander_f4p60_1858_transcript10571_g1	PREDICTED: putative ferric-chelate reductase 1 isoform X1 [Xenopus tropicalis]	0.79	1.4	1.41	1.11	1.86	0.57	0.77	0.17	0.13	0.23	0.25	0.14	4.36	3.46	3.32	1.73	6.3	1.9	120.46	89.03	197.26	37.31	27.8	67.04	182.52	210.74	349.56	250.2	247.52	157.37	182.24	139.28	178.58	19.22	38.66	102.5	97.16	423.36	148.75	151.03	34.65
GiantSalamander_f3p60_2124_transcript25541_g1	.	0.43	0.75	0.51	0.23	1.58	0.32	0.2	0.08	0.15	0.04	0.41	0.12	0.42	0.3	2.44	0.08	0.08	0.43	264.04	237.14	288.93	67.81	218.92	266.83	223.54	219.42	266.27	176.04	135.2	168.88	285.28	292.36	349.85	182.66	329.1	209.86	175.26	266.79	415.89	272.17	310.52
GiantSalamander_f2p24_4417_transcript16165_g1	hypothetical protein BRAFLDRAFT_118605 [Branchiostoma floridae]	0.12	0.03	0.07	0.01	0.07	0.04	0	0.02	0.03	0.02	0.01	0	0	0.02	0.02	0	0.03	0.04	134.83	196.32	149.65	14.7	6	40.36	26.68	36.37	16.21	1.8	0.58	5.93	14.88	12.8	9.4	1.85	3.22	188.1	420.69	158.5	7.76	2.13	21.44
GiantSalamander_f2p45_1884_transcript26557_g1	.	0.08	0.06	0.02	0.09	0.62	0.02	0	0.01	0.01	0	0.05	0	0.01	0.01	0	0.03	0	0	0.03	0.79	0.36	2.1	68.15	0.54	0.58	2.18	4.27	83.69	33.47	0.45	0.03	0.03	0	0.04	0	0.04	0.03	6.55	208.71	185.42	5.68
GiantSalamander_f4p60_571_transcript14339_g1	PREDICTED: small nuclear ribonucleoprotein E [Latimeria chalumnae]	197.41	190.54	176.91	198.72	202.27	258.39	294.2	126.47	101.38	418.8	326.16	354.43	89.25	77.12	158.66	162.41	136.62	95.38	241.74	278.92	268.94	200.09	216.27	287.22	265.38	236.79	257.66	306.13	287.81	240.76	233.01	225.14	419.01	191.62	369.09	275.65	276.65	369.77	305.37	387.97	320.08
GiantSalamander_f2p14_2970_transcript4201_g1	cytochrome c oxidase subunit III [Andrias davidianus]	45.1	38.44	37.37	34.97	46.09	43.12	80.94	202.06	418.39	109.88	152.37	169.61	35.03	33.43	36.11	157.77	46.05	35.63	36.17	39.29	25.43	34.69	52.62	38.26	38.89	39.58	38.32	58.35	52.57	54.83	43.75	37.97	45.18	134.9	73.71	31.09	38.53	40.23	23.52	34.91	40
GiantSalamander_f10p60_1013_transcript29430_g1	uncharacterized protein LOC100137677 [Xenopus laevis]	159.37	154.65	142.11	272.82	278.83	295.63	110.89	46.32	31.44	213.29	192.08	171.37	56.46	59.6	75.97	61.24	82.65	77.45	96.35	95.23	92.63	112.99	130.16	136.02	107.99	90.2	91.74	151.04	139.03	138.17	102.87	101.57	120.94	104.68	179.37	99.05	89.04	97.8	146.33	186.89	159.2
GiantSalamander_f15p60_1823_transcript10792_g1	protein phosphatase type 2A catalytic subunit [Homo sapiens]	364.92	396.36	412.9	342.87	274.93	350.04	105.54	54.93	31.47	85.68	57.1	74.61	45.11	46.87	56.43	8.56	33.05	24.99	144.73	134.56	184.8	59.55	71.75	68.31	122	136.43	156.18	113.73	87.64	101.89	162.65	181.41	198.51	80.7	163.75	125.48	136	171.83	97.25	103.09	104.77
GiantSalamander_f17p60_3606_transcript17560_g1	PREDICTED: nuclear receptor coactivator 4 [Xenopus tropicalis]	75.78	76.9	104.58	74.78	119.49	66.82	83.53	19.68	20.5	29.39	63.54	23.79	47.96	56.96	66.25	16.83	100.63	38.14	47.01	47.34	66.17	45.05	45.84	38.35	49.57	48.73	76.14	62.59	68.57	43.88	116.27	106.74	145.08	56.56	44.96	44.06	48.85	75.43	50.92	87.44	34.83
GiantSalamander_f3p23_4779_transcript354_g1	PREDICTED: alpha-2-macroglobulin-like [Cuculus canorus]	0.11	0.11	0.1	0.12	0.15	0.2	0.04	0.06	0.08	0.04	0.35	0.07	288.35	215.93	315.52	190.01	288.3	411.5	0.08	0.09	0.04	0.04	0.04	0.11	0.05	0.03	0.07	0.04	0.03	0.1	0.06	0.07	0.06	0.07	0.15	0.03	0.02	0	0.03	0.12	0.11
GiantSalamander_f12p60_940_transcript29549_g1	PREDICTED: protein FAM162B-like [Chelonia mydas]	8.04	7.76	9.9	8.24	5.37	10.03	6.39	0.9	0.51	3.81	4.17	3.25	137.35	146.25	126.2	60.96	196.58	83.5	195.9	160.59	187.57	70.03	106.99	130.14	206.38	190.21	237.77	315.99	322.82	200.91	293.08	272.99	242.76	74.08	174.7	114.66	129.2	249.36	221.09	274.56	120.29
GiantSalamander_f11p60_1106_transcript29340_g1	clathrin light chain A [Xenopus tropicalis]	260.52	258.93	253.67	333.44	261.53	356.93	133.88	37.55	27.33	174.12	124.42	137.44	139.48	138.84	167.1	78.88	107.75	115.06	132.37	146.61	146.6	79.83	91.45	133.46	132.04	127.89	125.35	122.48	115.82	126.46	202.8	196.33	214.48	88.1	162.26	136.46	123.61	149.83	158.54	142.34	131.6
GiantSalamander_f11p60_1875_transcript26685_g1	heterogeneous nuclear ribonucleoprotein L [Xenopus tropicalis]	266.57	316.83	292.1	306.43	223.27	331.81	96.07	114.55	103.15	127.86	123.65	139.42	45.86	38.9	96.09	267.97	49.36	83.54	193.02	168.7	255.76	90.73	249.47	226.28	125.93	135.78	159.93	118.4	101.79	119.42	188.32	225.57	315.74	272.4	408.05	212.56	140.45	219.43	186.77	178.93	359.2
GiantSalamander_f12p60_1067_transcript29298_g1	PREDICTED: sorcin isoform X3 [Papio anubis]	261.24	270.67	244.88	223.59	139.39	256.07	152.33	46.7	31.08	147.18	84.22	116.77	79.26	67.9	67.68	32.42	98.99	53.52	196.37	213.82	170.15	117.21	81.56	147.93	218.17	216.86	208.06	214.47	242.51	193.48	407.94	379.51	373.29	149.79	304.7	210.82	227.35	255.54	200.62	211.28	154.37
GiantSalamander_f23p60_2503_transcript23241_g1	PREDICTED: PC4 and SFRS1-interacting protein isoform X2 [Nannospalax galili]	218.07	191.91	163.1	248.6	194.11	209.94	11.62	2.99	0.91	14.43	10.21	10.3	5.57	6.68	4.89	0.59	7.35	4.76	16.79	11.11	15.77	11.66	2.94	4.09	12.35	12.73	12.47	14.83	15.94	13.27	10.79	12.87	14.3	3.9	3.52	13.57	16.53	15.34	4.86	8.54	1.88
GiantSalamander_f2p35_3380_transcript18431_g1	PREDICTED: protein-glutamine gamma-glutamyltransferase E, partial [Chelonia mydas]	0.05	0	0	0.15	0.88	0	0.02	0	0.05	0.03	0.15	0	0	0	0.02	0	0.06	0.05	66.07	94.61	251.06	14.8	152.63	162.42	68.77	99.05	126.33	149.08	159.63	141.83	0.03	0.17	1.76	0.14	0.05	11.93	5.69	96.51	228.52	404.16	86.3
GiantSalamander_f15p60_1516_transcript11882_g1	PREDICTED: dnaJ homolog subfamily A member 1 [Condylura cristata]	211.53	214.22	213.13	217.76	182.73	198.63	181.16	51.58	42.02	174.24	177	152.61	58.87	51.09	87.85	83.85	98.64	87.27	148.48	158.04	145.5	146.18	168.25	234.65	134.02	113.35	124.37	137.35	130.8	125.43	193.03	205.11	197.1	122.28	205.06	155.38	142.16	141.12	263.74	268.07	233.42
GiantSalamander_f9p60_3147_transcript3158_g1	PREDICTED: keratin, type II cytoskeletal 75-like, partial [Acinonyx jubatus]	0.01	0	0	1.16	0.01	0	0.08	0	0	0.15	0	0	0	0	0	0	0	0	0.05	26.66	11.61	48.99	0.02	44.7	75.85	28.78	40.87	403.86	67.85	88.7	0	1.75	0	0	0	49.04	6.12	78.86	287.76	177.49	0
GiantSalamander_f3p50_2225_transcript8588_g1	serotransferrin-B precursor [Xenopus laevis]	0.1	2.9	2.12	2.57	0	0	0.46	0	1.24	0.37	0	0	327.88	402.67	317.4	3.58	228.98	334.26	0	1.58	3.1	0	0	0	0.11	0.35	0	0	0.25	0.1	0.15	0	0	0	0	0	0	1.91	0	0	0.03
GiantSalamander_f24p60_1257_transcript12629_g1	PREDICTED: nicotinamide N-methyltransferase-like [Chelonia mydas]	0.15	0.09	0.05	0.12	3.01	0.31	0.13	3.31	0	0.04	0.22	0.04	0.02	0	0	0	0	0.38	69.75	67.46	79.08	126.49	402.62	96.56	0.9	1.84	0.05	0.59	7.05	2.69	0.04	2.92	0.3	9.21	11.55	112.27	118.11	50.68	86.01	70.48	200.83
GiantSalamander_f15p60_1021_transcript29338_g1	PREDICTED: superoxide dismutase [Mn], mitochondrial [Sarcophilus harrisii]	95.57	93.44	89.22	109.21	101.58	121.59	239.02	37.96	33.26	321.22	216.72	212.98	72.28	68.8	69.32	19.63	115.33	80.72	55.67	70.77	56.42	86.7	49.37	97.17	80.05	82.4	86.09	105.39	123.63	111.69	87.26	99.69	107.92	34.63	48.77	75.25	82.96	80.39	103.61	146.41	56.5
GiantSalamander_f3p60_1957_transcript10162_g1	apolipoprotein M precursor [Xenopus tropicalis]	0.1	0.08	0.02	0.12	0.2	0.03	0.04	0.15	0.3	0.02	0.23	0.06	268.28	274.16	268.5	155.37	234.86	402.19	0.17	0.2	0.09	0.05	0.1	0.05	0.09	0.08	0.08	0.03	0.02	0.05	0	0	0.08	0.11	0.21	0.08	0.11	0.13	0.08	0.06	0.11
GiantSalamander_f3p21_1508_transcript27921_g1	coagulation factor VII precursor [Xenopus laevis]	0.02	0.02	0	0	0	0.08	0.06	0.13	0.16	0	0.26	0.01	172.56	173.72	217.64	79.9	258.3	258.19	0.05	0.07	0.04	0.03	0	0	0	0.02	0.06	0	0	0	0.02	0	0	0	0.15	0	0.03	0	0	0.03	0.05
GiantSalamander_f32p60_1725_transcript11118_g1	PREDICTED: dispanin subfamily A member 2b [Chrysemys picta bellii]	59.25	60.04	49.01	33.8	35.85	34.47	318.12	221.79	116.89	399.72	298.99	303.85	89.64	93.52	130.08	109.18	108.21	115.01	220.25	173.96	320.1	113	144	152.25	148.2	146.42	147.25	127.48	134.37	159.55	153.49	151.38	159.13	139.4	160.76	269.72	175.12	211.09	138.46	141.67	248.55
GiantSalamander_f2p24_4113_transcript16430_g1	Tgm2-prov protein, partial [Xenopus laevis]	19.53	21.79	24.78	29.72	18.6	18.24	303.04	79.05	28.2	388.43	252.44	398.09	11.04	11.13	23.28	5.52	8.76	9.81	30.07	32.32	39.92	19.63	15.82	28.47	14.51	15.84	15.96	14.45	16.11	18.61	13.96	18.67	34.89	21.49	16.95	23.3	24.58	23.35	22.02	43.96	28.86
GiantSalamander_f2p24_5097_transcript15554_g1	Unknown (protein for IMAGE:5440084) [Xenopus laevis]	0.26	0.36	0.33	0.43	0.14	0.12	0.05	0.13	0.11	0.05	0.27	0.02	193.91	158.7	200.48	264.79	248.89	397.88	0.14	0.06	0.16	0.2	0.29	0.15	0.16	0.06	0.07	0.05	0.29	0.17	0.02	0.04	0.02	0.1	0.04	0.14	0.13	0.08	0.09	0.12	0.32
GiantSalamander_f2p29_3254_transcript18943_g1	Keratin, type II cytoskeletal 75, partial [Podiceps cristatus]	0	0	0	0	0	0.6	0	0.12	0	0	0.03	0	0	0	0	0	0	0	0.56	0.05	1.84	0.6	0	396.9	1.11	2.81	2.85	8.12	2.78	3.83	0	0.03	0	0	3.02	0	1.36	2.97	5.55	2.77	0
GiantSalamander_f10p60_698_transcript14039_g1	H/ACA ribonucleoprotein complex subunit 3 [Rana catesbeiana]	191.74	237.67	189.01	264.57	269.49	283.93	156.67	88.03	71.47	215.63	207.13	163.45	94.34	83.66	151.99	88.09	58.66	117.93	157.32	173.8	203.45	92.57	187.08	213.26	142.62	156.54	153.46	101.11	112.17	114.04	173.45	183.99	227.41	151.74	211.83	200.55	156.65	184.57	196.37	119.77	266.62
GiantSalamander_f9p60_1132_transcript13043_g1	ATP synthase, H+ transporting, mitochondrial F1 complex, gamma polypeptide 1 [Xenopus laevis]	306.65	320.17	267.02	275.85	245.13	297.47	81.66	21.77	18.19	16.67	10.91	9.56	141.92	162.27	132.34	13.69	31.67	25.32	199.89	245.93	177.53	75.95	55.12	116.13	229.53	250.27	249.59	108.86	90.65	112.18	393.18	375.95	396.03	84.39	177.6	224.33	265.05	296.96	147.57	128.78	87.73
[truncated: 9,517 more rows]

## Sheet: Table S9
name	Adduct	Metabolite	m/z	RT(s)	Liver												Brain												Fore limb												Tail
[truncated: 539 more rows]
[truncated: 15 more columns]

[truncated: 2 more sheets: Table S10, Table S11]
